# Supplementary material
Source: PubMed Central journal article supplement (PMC5269652)

# Lewis Acid Induced Toggle From Ir(II) to Ir(IV) Pathways in Photocatalytic Reactions: Synthesis of Thiomorpholines and Thiazepanes from Aldehydes and SLAP Reagents

## Supporting Information

Sheng-Ying Hsieh and Jeffrey W. Bode\*

Laboratorium für Organische Chemie, Department of Chemistry and Applied Biosciences  
ETH Zürich, Zürich 8093, Switzerland

bode@org.chem.ethz.ch

### Table of Contents

---

|                                                                                                                                                                                               |     |
|-----------------------------------------------------------------------------------------------------------------------------------------------------------------------------------------------|-----|
| 1. General information.....                                                                                                                                                                   | S2  |
| 1.1 Materials.....                                                                                                                                                                            | S2  |
| 1.2 Blue light reactor and the photocatalytic reaction.....                                                                                                                                   | S2  |
| 1.3 Reaction monitoring and purification.....                                                                                                                                                 | S3  |
| 1.4 Characterization instruments.....                                                                                                                                                         | S3  |
| 2. Preparation of SLAP reagents.....                                                                                                                                                          | S4  |
| 2.1 Synthesis of <b>SLAP TM</b> reagent <b>1a</b> .....                                                                                                                                       | S4  |
| 2.2 Synthesis of <b>SLAP TM</b> reagent <b>1b</b> .....                                                                                                                                       | S5  |
| 2.3 Synthesis of <b>SLAP TM</b> reagent <b>1c</b> .....                                                                                                                                       | S6  |
| 2.4 Synthesis of <b>SLAP M</b> reagent <b>11</b> .....                                                                                                                                        | S8  |
| 3. Photocatalytic synthesis of thiomorpholines and thiazepanes with SLAP reagents.....                                                                                                        | S10 |
| 3.1 Early examinations for imine cyclization condition.....                                                                                                                                   | S10 |
| 3.2 Screening of cyclization conditions.....                                                                                                                                                  | S12 |
| 3.3 General procedure.....                                                                                                                                                                    | S14 |
| 3.4 Substrate scope with non-heterocyclic aldehydes and ketones (Scheme 2).....                                                                                                               | S15 |
| 3.5 Substrate scope with heterocyclic aldehydes (Scheme 3).....                                                                                                                               | S19 |
| 3.6 Preliminary substrate scope of substituted morpholines and thiomorpholines with organo-<br>photocatalyst 2,4,6-triphenylpyrylium tetrafluoroborate (TPP•BF <sub>4</sub> ) (Scheme 4)..... | S24 |
| 3.7 Photocyclization of alkene mimics (Scheme 5).....                                                                                                                                         | S25 |
| 4. Stern-Volmer fluorescence quenching experiments.....                                                                                                                                       | S28 |
| 5. Cyclic voltammogram of several reaction components.....                                                                                                                                    | S29 |
| 6. X-ray crystallography.....                                                                                                                                                                 | S31 |
| 6.1 Crystal structure of <b>14a</b> .....                                                                                                                                                     | S31 |
| 6.2 Crystal structure of <b>14b</b> .....                                                                                                                                                     | S35 |
| 7. References.....                                                                                                                                                                            | S39 |
| 8. NMR spectra.....                                                                                                                                                                           | S40 |

## 1. General information

Reactions with anhydrous solvents were carried out in oven-dried glassware under N<sub>2</sub> using standard manifold techniques.<sup>1</sup>

### 1.1 Materials

Compounds that are not described in the experimental part were synthesized according to literature procedures. Unless otherwise stated, chemicals were purchased from ABCR, Acros, Alfa Aesar, Apollo Scientific, Fluorochem, Maybridge, Merck, Sigma-Aldrich, Strem, or TCI, and were used without further purification. Common organic solvents were used as supplied (ACS or HPLC grade). Anhydrous MeCN, CH<sub>2</sub>Cl<sub>2</sub>, and THF (HPLC grade) were freshly dried by passage over activated alumina under an inert atmosphere of N<sub>2</sub>. 1,1,1,3,3,3-Hexafluoro-2-propanol is abbreviated to HFIP, and 2,2,2-trifluoroethanol to TFE. BF<sub>3</sub>•MeCN (15.2–16.8%, 0.87–0.88 g/mL) was purchased from Sigma-Aldrich and used directly (using 15.2% and 0.87 g/mL for calculating the stoichiometry).

*All the synthesized SLAP reagents were stored under 4 °C to avoid the decomposition.*

### 1.2 Blue light reactor and the photocatalytic reaction

Nichia LumiFlex LED strip (blue light,  $\lambda_{\text{max}} = 467 \text{ nm}$ , 6 W for 30 LEDs) were purchased from Lumitronix<sup>®</sup> LED-Technik (<http://www.leds.de/>) and assembled in a 15×12×12 cm<sup>3</sup> metal case with total 150 blue LEDs (**maximum power: 30 W**). The case was also equipped with a cooling fan (12×12 cm<sup>2</sup>) to maintain the temperature at room temperature. Detailed specification of the blue LEDs can be found in this webpage: <http://www.leds.de/en/LED-strips-modules-oxid-oxid-oxid/Flexible-LED-strips/LumiFlex-LED-Leiste-30-LEDs-50cm-24V-blue.html>.

Photocatalytic reactions were carried out in closed glass vials (sizes depended on reaction scales), neither degassed beforehand nor conducted under dry conditions. The vials were exposed next to the blue LEDs as shown in Figure S1.

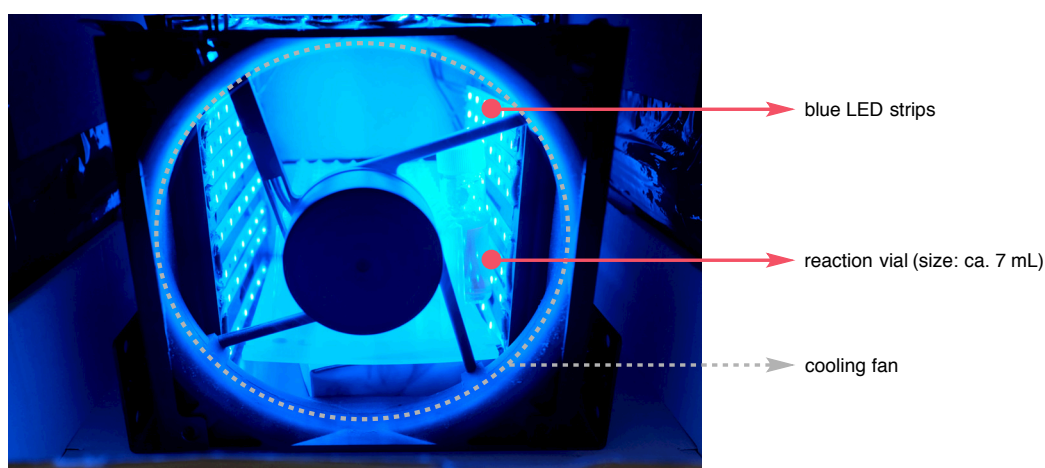

**Figure S1.** Blue light reactor/reaction setup. We thank Dr. Benedikt Wanner from the Bode group of Laboratorium für Organische Chemie at ETH Zürich for the construction of this blue reactor.

### 1.3 Reaction monitoring and purification

Thin layer chromatography (TLC) was performed on glass-backed plates pre-coated with silica gel (*Merck*, Silica Gel 60 F254), and visualized by UV quenching and by staining with basic  $\text{KMnO}_4$ , ninhydrin solution, or phosphomolybdic acid.

Flash column chromatography<sup>2</sup> was performed on silica gel (*Silicycle* SiliaFlash F60, 230–400 mesh) using a forced flow of eluent at 0.4–0.5 bar.

### 1.4 Characterization instruments

NMR spectra were recorded on *Bruker* Avance 400 MHz, and *Varian* Mercury 300 MHz spectrometers using  $\text{CDCl}_3$  as the solvent unless indicated otherwise. The residual signal of the  $\text{CDCl}_3$  was used as the internal standard (7.26 ppm in  $^1\text{H}$  and 77.160 ppm in  $^{13}\text{C}$  NMR). No additional internal standard was used in the measurement of  $^{19}\text{F}$  NMR. Peaks of  $^{13}\text{C}$  NMR from the major isomers were marked with asterisks if able to be recognized.

Infrared (IR) data was obtained on a *JASCO* FT-IR-4100 spectrometer with only major peaks being reported.

Melting points (m.p.) were measured on an *Electrothermal Mel-Temp* melting point apparatus and were uncorrected.

High resolution mass spectra were measured by the Mass Spectrometry Service Facility of Laboratorium für Organische Chemie at ETH Zürich on a *Bruker* Daltonics maXis for ESI-Qq-TOF spectrometer (ESI-MS) or *Micromass* (Waters) AutoSpec Ultima for EI spectrometer (EI-MS).

## 2. Preparation of SLAP reagents

### 2.1 Synthesis of SLAP TM reagent 1a

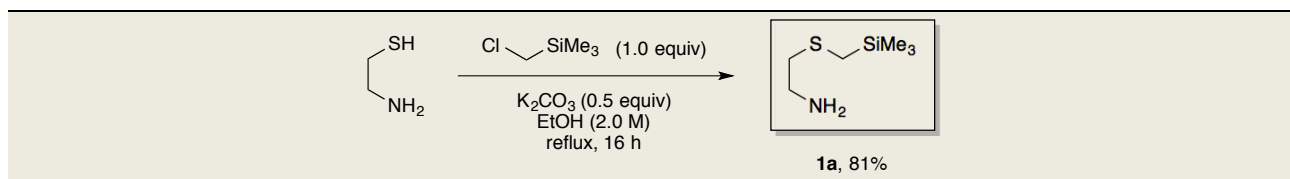

#### 2-(((Trimethylsilyl)methyl)thio)ethanamine (1a)

A mixture of 2-aminoethanethiol (3.1 g, 40.0 mmol, 1.0 equiv), (chloromethyl)trimethylsilane (5.5 mL, 40.0 mmol, 1.0 equiv), and  $\text{K}_2\text{CO}_3$  (2.8 g, 20.0 mmol, 0.5 equiv) in EtOH (20 mL, 2.0 M) was heated to reflux under  $\text{N}_2$  for 16 h. The reaction was cooled to room temperature and filtered through a sintered glass funnel. The filtrate was condensed under *vacuo* and the residue was purified by distillation at reduced pressure to afford the desired product (5.4 g, 82%) as colorless oil.

**b.p.:** 58–60 °C at  $1.5 \times 10^{-2}$  mbar;  **$^1\text{H NMR}$**  (400 MHz,  $\text{CDCl}_3$ ):  $\delta$  [ppm] = 2.84 (td,  $J = 6.2, 1.0$  Hz, 2 H), 2.56 (td,  $J = 6.2, 1.0$  Hz, 2 H), 1.71 (d,  $J = 1.0$  Hz, 2 H), 1.33 (br, 2 H), 0.05 (s, 9 H);  **$^{13}\text{C NMR}$**  (100 MHz,  $\text{CDCl}_3$ ):  $\delta$  [ppm] = 40.3, 40.3, 17.9, -1.7; **HRMS** (ESI): calculated for  $[\text{C}_6\text{H}_{18}\text{NSSi}]^+$ :  $m/z = 164.0924$ , found:  $m/z = 164.0926$ ; **IR** ( $\text{v}/\text{cm}^{-1}$ , neat): 3353, 3287, 2954, 2898, 1575, 1471, 1390, 1320, 1249, 845, 696.



## 2.2 Synthesis of SLAP TM reagent 1b

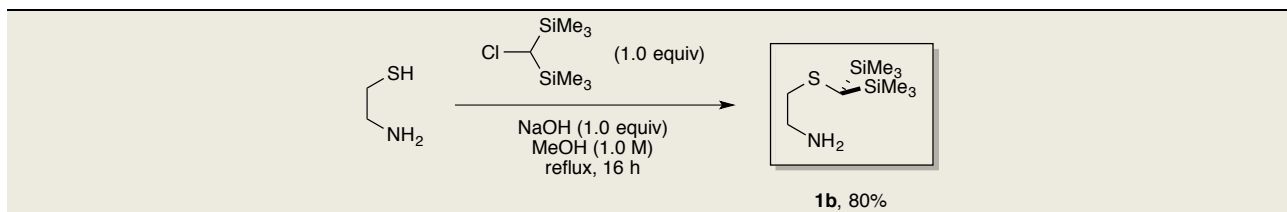

## 2-((Bis(trimethylsilyl)methyl)thio)ethanamine (1b)

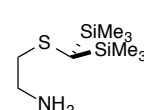 The procedure was modified from the literature.<sup>3</sup> To a stirred solution of NaOH (0.6 g, 16.0 mmol, 1.0 equiv) in MeOH (16 mL, 1.0 M), 2-aminoethanethiol (1.2 g, 16.0 mmol, 1.0 equiv) and bis(trimethylsilyl)chloromethane (3.5 mL, 16.0 mmol, 1.0 equiv) were added. The reaction was refluxed under N<sub>2</sub> for 16 h before cooled to room temperature. Water (10 mL) was added and the mixture was condensed under *vacuo*. The residue was extracted with CH<sub>2</sub>Cl<sub>2</sub> (3×20 mL), and the collected organic extracts were combined, washed with brine, dried over Na<sub>2</sub>SO<sub>4</sub>, filtered, and evaporated under *vacuo*. The residue was purified by distillation at reduced pressure to afford the desired product (3.0 g, 80%) as colorless oil.

**b.p.:** 89–91 °C at  $1.5 \times 10^{-2}$  mbar; **<sup>1</sup>H NMR** (400 MHz, CDCl<sub>3</sub>): δ [ppm] = 2.83–2.80 (m, 2 H), 2.56 (ddd, *J* = 7.1, 5.8, 1.1 Hz, 2 H), 1.57 (br, 1 H), 0.61 (d, *J* = 1.1 Hz, 2 H), 0.10 (s, 18 H); **<sup>13</sup>C NMR** (100 MHz, CDCl<sub>3</sub>): δ [ppm] = 41.0, 40.9, 17.0, –0.1; **HRMS** (ESI): calculated for [C<sub>9</sub>H<sub>26</sub>NSSi<sub>2</sub>]<sup>+</sup>: *m/z* = 236.1319, found: *m/z* = 236.1321; **IR** (ν/cm<sup>-1</sup>, neat): 3361, 3287, 2952, 2898, 2859, 1582, 1464, 1427, 1249, 1001, 842, 770, 683.

## 2.3 Synthesis of SLAP TM reagent 1c

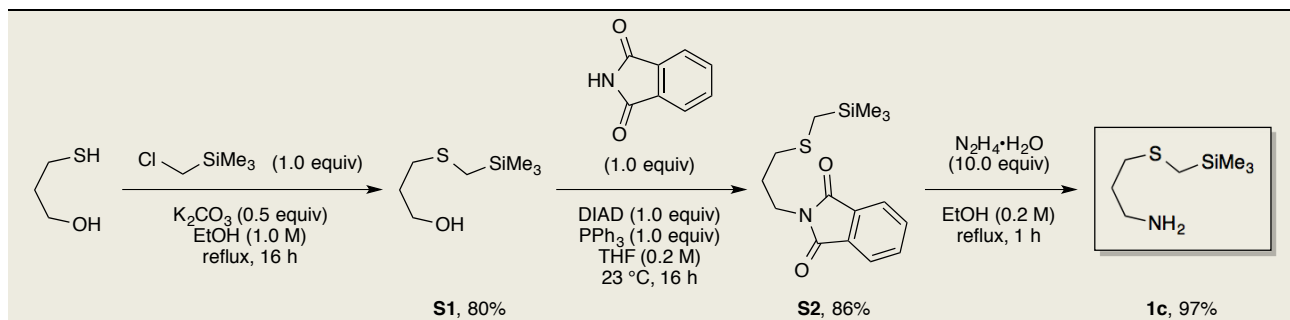

## 3-(((Trimethylsilyl)methyl)thio)propan-1-ol (S1)

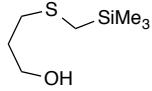
 A mixture of 1-mercapto-2-propanol (2.6 mL, 30.0 mmol, 1.0 equiv), (chloromethyl)trimethylsilane (4.1 mL, 30.0 mmol, 1.0 equiv), and  $\text{K}_2\text{CO}_3$  (2.1 g, 15.0 mmol, 1.0 equiv) in EtOH (30 mL, 1.0 M) was heated to reflux under  $\text{N}_2$  for 16 h. The reaction was cooled to room temperature and filtered through a sintered glass funnel. The filtrate was condensed under *vacuo* and the residue was purified by distillation at reduced pressure to afford the desired product (4.3 g, 80%) as colorless oil.

**b.p.:** 80–82 °C at  $1.5 \times 10^{-2}$  mbar;  $^1\text{H NMR}$  (400 MHz,  $\text{CDCl}_3$ ):  $\delta$  [ppm] = 3.74–3.71 (m, 2 H), 2.61 (td,  $J$  = 7.1, 1.2 Hz, 2 H), 2.02 (br, 1 H), 1.88–1.81 (m, 2 H), 1.77 (s, 2 H), 0.07 (s, 9 H);  $^{13}\text{C NMR}$  (100 MHz,  $\text{CDCl}_3$ ):  $\delta$  [ppm] = 62.1, 33.1, 31.2, 18.4, –1.6; **HRMS** (EI): calculated for  $[\text{C}_7\text{H}_{18}\text{OSSi}]^+$ :  $m/z$  = 178.0848, found:  $m/z$  = 178.0852; **IR** ( $\text{v}/\text{cm}^{-1}$ , neat): 3357, 2953, 2879, 1416, 1391, 1249, 1062, 846, 773, 753, 697.

## 2-(3-(((Trimethylsilyl)methyl)thio)propyl)isoindoline-1,3-dione (S2)

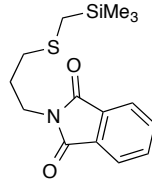
**S1** (1.8 g, 10.0 mmol, 1.0 equiv), phthalimide (1.5 g, 10.0 mmol, 1.0 equiv), and  $\text{PPh}_3$  (2.6 g, 10.0 mmol, 1.0 equiv) were dissolved in anhydrous THF (50 mL, 0.2 M) under  $\text{N}_2$ . This clear solution was cooled to 0 °C and diisopropyl azodicarboxylate (DIAD, 2.0 mL, 10.0 mmol, 1.0 equiv) was added dropwise. The reaction was allowed to warm to room temperature and stirred under  $\text{N}_2$  for 16 h. After the solvent was removed under *vacuo*, the residue was purified by flash column chromatography (5% to 10% hexanes in EtOAc) to afford the product (2.6 g, 86%) as colorless oil.

$^1\text{H NMR}$  (400 MHz,  $\text{CDCl}_3$ ):  $\delta$  [ppm] = 7.81 (dd,  $J$  = 5.5, 3.0 Hz, 2 H), 7.68 (dd,  $J$  = 5.5, 3.0 Hz, 2 H), 3.76 (dd,  $J$  = 7.6, 6.7 Hz, 2 H), 2.55–2.51 (m, 2 H), 1.95 (qd,  $J$  = 7.4, 6.3 Hz, 2 H), 1.74 (s, 2 H), 0.04 (s, 9 H);  $^{13}\text{C NMR}$  (100 MHz,  $\text{CDCl}_3$ ):  $\delta$  [ppm] = 168.4, 134.0, 132.2, 123.3, 37.3, 33.4, 27.7, 18.2, –1.6; **HRMS** (ESI): calculated for  $[\text{C}_{15}\text{H}_{21}\text{NNaO}_3\text{SSi}]^+$ :  $m/z$  = 330.0954, found:  $m/z$  = 330.0955; **IR** ( $\text{v}/\text{cm}^{-1}$ , neat): 2952, 1773, 1714, 1438, 1395, 1365, 1248, 1087, 1011, 847, 719.

## 3-(((Trimethylsilyl)methyl)thio)propan-1-amine (1c)

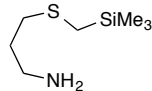
 Hydrazine monohydrate (4.0 mL, 81.3 mmol, 10.0 equiv) was added to a solution of **S2** (2.5 g, 8.1 mmol, 1.0 equiv) in EtOH (41 mL, 0.2 M). The mixture was heated under reflux for 1 h and the white solids precipitated during the reaction. The reaction was cooled to room temperature and sufficient amount of 5%  $\text{NaOH}_{(\text{aq})}$  was added to dissolve the white precipitates. EtOH was removed under *vacuo* and the remained aqueous layer was extracted by  $\text{CH}_2\text{Cl}_2$  (3×20 mL). The combined extracts were washed with brine, dried over  $\text{Na}_2\text{SO}_4$ , filtered, and condensed under *vacuo* to afford the desired product (1.4 g, 97%) as colorless oil without further purification.

$^1\text{H NMR}$  (400 MHz,  $\text{CDCl}_3$ ):  $\delta$  [ppm] = 2.78 (t,  $J$  = 6.9 Hz, 2 H), 2.54 (td,  $J$  = 7.2, 1.0 Hz, 2 H), 2.11 (br, 2 H), 1.77–1.70 (m, 4 H), 0.06 (s, 9 H);  $^{13}\text{C NMR}$  (100 MHz,  $\text{CDCl}_3$ ):  $\delta$  [ppm] = 41.0, 33.6, 32.3, 18.5, –1.6;

**HRMS** (ESI): calculated for  $[\text{C}_7\text{H}_{20}\text{NSSi}]^+$ :  $m/z = 178.1080$ , found:  $m/z = 178.1081$ ; **IR** ( $\text{v}/\text{cm}^{-1}$ , neat): 3354, 2953, 1574, 1485, 1471, 1436, 1390, 1324, 1249, 1132, 844, 773, 753, 696.

## 2.4 Synthesis of SLAP M reagent 11

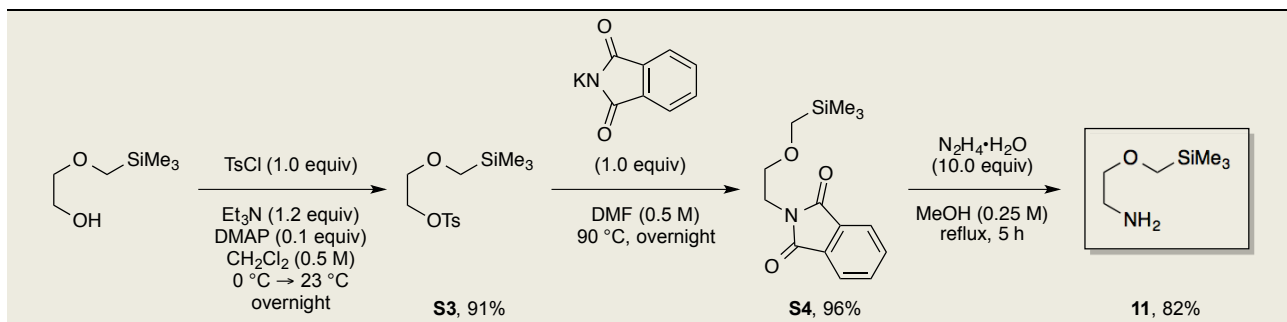

## 2-((Trimethylsilyl)methoxy)ethyl 4-methylbenzenesulfonate (S3)

2-((trimethylsilyl)methoxy)ethan-1-ol (5.9 g, 40.0 mmol, 1.0 equiv),<sup>4,5</sup> 4-toluenesulfonyl chloride (TsCl, 7.6 g, 40.0 mmol, 1.0 equiv) and 4-dimethylaminopyridine (DMAP, 0.5 g, 4.0 mmol, 0.1 equiv) were dissolved and stirred in anhydrous CH<sub>2</sub>Cl<sub>2</sub> (80.0 mL, 0.5 M) under N<sub>2</sub>. The solution was cooled in an ice bath and Et<sub>3</sub>N (6.7 mL, 48.0 mmol, 1.2 equiv) was added slowly. After the completion of addition, the mixture was gradually warmed to room temperature and remained stirred overnight. The reaction was washed with 5% HCl<sub>(aq)</sub> (3×30 mL), water (30 mL), and brine (30 mL). The organic layer was dried over Na<sub>2</sub>SO<sub>4</sub>, filtered, and evaporated under *vacuo* to afford the desired product (11.1 g, 91%) as colorless oil without further purification.

<sup>1</sup>H NMR (400 MHz, CDCl<sub>3</sub>): δ [ppm] = 7.78 (d, *J* = 8.3 Hz, 2 H), 7.33–7.31 (m, 2 H), 4.13–4.10 (m, 2 H), 3.58–3.55 (m, 2 H), 3.05 (s, 2 H), 2.43 (s, 3 H), –0.02 (s, 9 H); <sup>13</sup>C NMR (100 MHz, CDCl<sub>3</sub>): δ [ppm] = 144.8, 133.2, 129.9, 128.0, 72.3, 69.3, 65.7, 21.7, –3.1; HRMS (ESI): calculated for [C<sub>13</sub>H<sub>23</sub>O<sub>4</sub>SSi]<sup>+</sup>: *m/z* = 303.1081, found: *m/z* = 303.1085; IR (ν/cm<sup>-1</sup>, neat): 2956, 2896, 2855, 2807, 1599, 1369, 1359, 1248, 1189, 1177, 1120, 1098, 1017, 925, 862, 816, 778, 664.

## 2-((Trimethylsilyl)methoxy)ethylisoindoline-1,3-dione (S4)

To a stirred solution of **S3** (9.1 g, 30.0 mmol, 1.0 equiv) in DMF (60.0 mL, 0.5 M), potassium phthalimide (5.6 g, 30.0 mmol, 1.0 equiv) was added in one portion at room temperature. The reaction was heated to 90 °C overnight prior to the addition of H<sub>2</sub>O (10 mL). The mixture was cooled to room temperature and DMF was removed under *vacuo*. The residue was suspended with additional brine and extracted with EtOAc (3×50 mL). The organic extracts were combined, washed with water (twice) and brine, dried over Na<sub>2</sub>SO<sub>4</sub>, filtered, and evaporated under *vacuo* to afford the desired product (8.0 g, 96%) as colorless oil without further purification.

<sup>1</sup>H NMR (400 MHz, CDCl<sub>3</sub>): δ [ppm] = 7.82 (ddd, *J* = 5.6, 3.1, 1.3 Hz, 2 H), 7.68 (ddd, *J* = 5.6, 3.1, 1.3 Hz, 2 H), 3.87 (td, *J* = 5.8, 1.3 Hz, 2 H), 3.63–3.60 (m, 2 H), 3.12 (s, 2 H), –0.07 (s, 9 H); <sup>13</sup>C NMR (100 MHz, CDCl<sub>3</sub>): δ [ppm] = 168.3, 133.9, 132.3, 123.2, 71.6, 64.9, 37.1, –3.1; HRMS (ESI): calculated for [C<sub>14</sub>H<sub>19</sub>NNaO<sub>3</sub>SSi]<sup>+</sup>: *m/z* = 300.1026, found: *m/z* = 300.1027; IR (ν/cm<sup>-1</sup>, neat): 2954, 2896, 2856, 2804, 1775, 1714, 1469, 1428, 1392, 1359, 1248, 1189, 1106, 1040, 891, 720.

## 2-((Trimethylsilyl)methoxy)ethan-1-amine (11)

**ATTENTION: The title product is volatile!** Hydrazine monohydrate (12.2 mL, 250.0 mmol, 10.0 equiv) was added to a solution of **S4** (6.9 g, 25.0 mmol, 1.0 equiv) in MeOH (100 mL, 0.25 M). The mixture was heated under reflux for 5 h and the white solids precipitated during the reaction. The reaction was cooled to room temperature and sufficient amount of 2 N NaOH<sub>(aq)</sub> was added to dissolve the white precipitates. MeOH was removed under *vacuo* carefully and the residue was extracted by Et<sub>2</sub>O (4×30 mL). The combined extracts were washed with 2 N NaOH<sub>(aq)</sub> and brine, dried over Na<sub>2</sub>SO<sub>4</sub>, filtered, and condensed under *vacuo* carefully to remove Et<sub>2</sub>O. The residue was purified by distillation at reduced pressure to afford the desired product (3.0 g, 82%) as colorless oil.

**b.p.:** 66–68 °C at 40 mbar; **<sup>1</sup>H NMR** (400 MHz, CDCl<sub>3</sub>): δ [ppm] = 3.41 (t, *J* = 5.1 Hz, 2 H), 3.11 (s, 2 H), 2.81 (t, *J* = 5.1 Hz, 2 H), 1.41 (br, 2 H), 0.04 (s, 9 H); **<sup>13</sup>C NMR** (100 MHz, CDCl<sub>3</sub>): δ [ppm] = 77.5, 65.2, 41.9, -2.9; **HRMS** (ESI): calculated for [C<sub>6</sub>H<sub>18</sub>NOSi]<sup>+</sup>: *m/z* = 148.1152, found: *m/z* = 148.1152; **IR** (ν/cm<sup>-1</sup>, neat): 3369, 2956, 2845, 1575, 1479, 1434, 1309, 1249, 1105, 861, 701.

### 3. Photocatalytic synthesis of thiomorpholines and thiazepanes with SLAP reagents

#### 3.1 Early examinations for imine cyclization condition

Initially, the radical desilylation was inspired from the Yoon and Mariano groups, and we wondered if the imine **S5** from the **SLAP TM** reagent **1a** could perform cyclization under UV-irradiation (Scheme S1).<sup>6-8</sup> However, we didn't observe the cyclization of imine **S5** in degassed MeOH under the exposure of UV while alternation to the degassed solvent HFIP allowed the formation of a non-desilylated thiomorpholine **7c** with unreacted imine recovered. In addition, this condition was not effective for the imine **S6** from morpholine forming **SLAP M** reagent **11**, and the reaction under strong UV light in long reaction time was neither pleasant. As the consequence of these preliminary findings, we decided to re-examine the feasibility of SLAP reagents using different potential photoredox catalysts under visible-light mediated conditions.

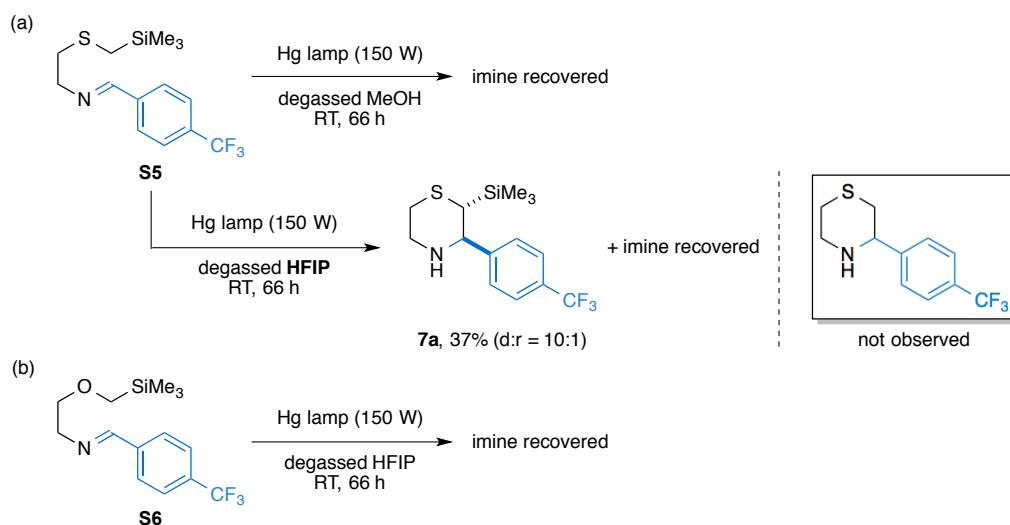

**Scheme S1.** UV-irradiated cyclization of imines from (a) **SLAP TM** reagent **1a** and (b) **SLAP** reagent **11**. (preliminary results from Dr. Jiang Tuo, ETH Zürich).

Different electrochemical values of several photocatalysts for their reductive quenching cycles ( $PC^* \rightarrow PC^-$ ) are illustrated in the Figure S2, with the comparison of the oxidation potentials of different SLAP reagents and the reduction potentials of the formed N-centered radicals. According to this information, several photocatalysts ( $Ir^{III}[dF(CF_3)ppy]_2(dtbbpy)PF_6$ ,<sup>9,10</sup> 2CzIPN,<sup>11,12</sup> 4DAIPN<sup>11,12</sup>) seemed appropriate to our thiomorpholine forming **SLAP TM** reagents.

The corresponding imine **2a** from the **SLAP TM** reagent **1a** was first subject to the photocatalytic cyclization using  $Ir^{III}[dF(CF_3)ppy]_2(dtbbpy)PF_6$  as the catalyst, but only the imine was recovered (Scheme S2). This was probably because the reducing ability of forming  $Ir^{II}[dF(CF_3)ppy]_2dtbbpy$  was not sufficient to reduce the N-centered radical despite high oxidizing ability of photoexcited  $*Ir^{III}[dF(CF_3)ppy]_2(dtbbpy)^+$  species. The other two organic photocatalysts were also applied to the cyclization with the imine but not successful. In the case with 2CzIPN trace amount of product was observed, combined with the imine recovered majorly and unidentified side products. While the condition with photocatalyst 2CzIPN could be promising if optimization is applied, the unreliable preparation protocol of this catalyst and the unexpected formation of side products hampered further investigations.

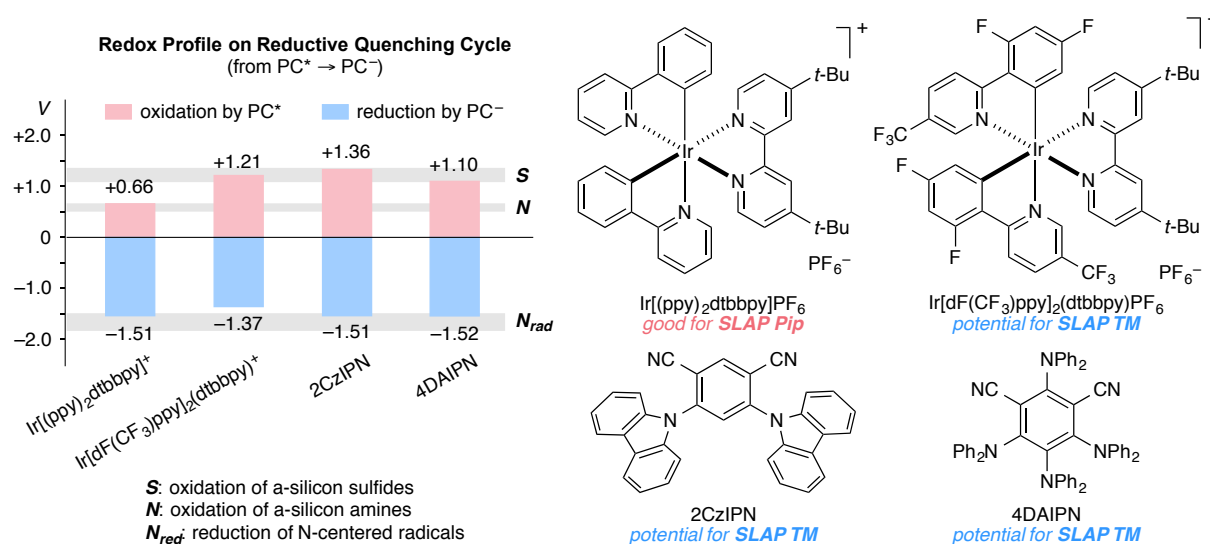

**Figure S2.** Evaluation of potential photocatalysts. PC = photocatalyst.

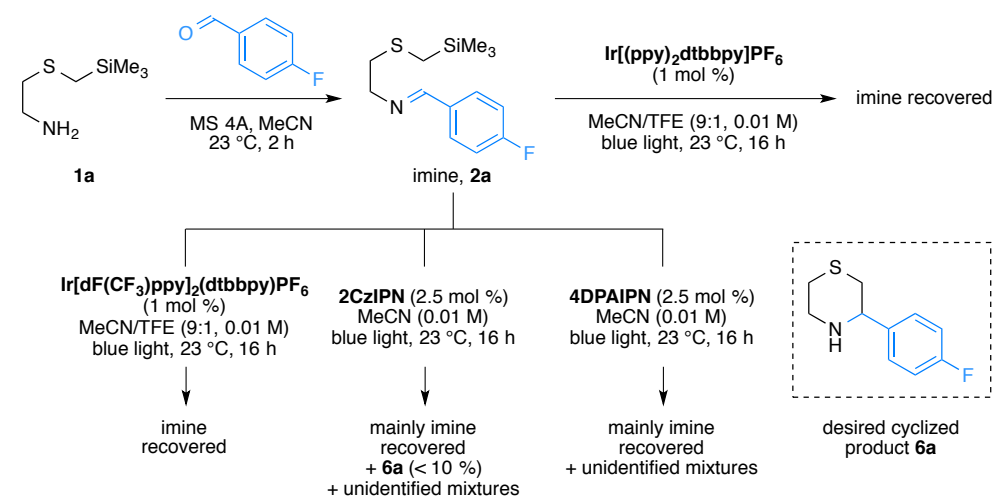

**Scheme S2.** Photocyclization of imine **2a** with potential catalysts.

## 3.2 Screening of cyclization conditions

Table S1. Screening of cyclization conditions.

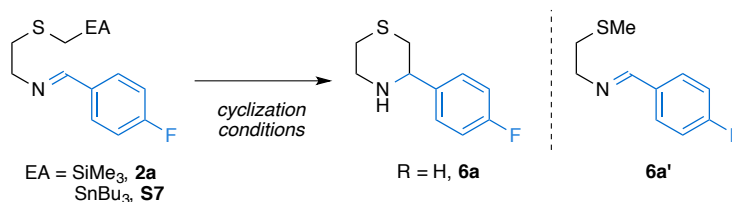

| entry | imine <sup>a</sup> | condition                                                                                                                                                          | result                         |
|-------|--------------------|--------------------------------------------------------------------------------------------------------------------------------------------------------------------|--------------------------------|
| 1     | <b>2a</b>          | <b>SnAP conditions:</b> Cu(OTf) <sub>2</sub> (1.0 equiv), 2,6-lutidine (1.0 equiv), CH <sub>2</sub> Cl <sub>2</sub> /HFIP (4:1, 0.10 M), 23 °C, 16 h               | imine recovered                |
| 2     | <b>2a</b>          | <b>SLAP N-Bn conditions:</b> Ir[(ppy) <sub>2</sub> dtbbpy]PF <sub>6</sub> (1 mol %), MeCN/TFE (9:1, 0.05 M), 23 °C, blue light, 16 h                               | imine recovered                |
| 3     | <b>S7</b>          | Ir[(ppy) <sub>2</sub> dtbbpy]PF <sub>6</sub> (1 mol %), MeCN/TFE (9:1, 0.05 M), 23 °C, blue light, 16 h                                                            | <b>6a</b> , 42% <sup>b</sup>   |
| 4     | <b>2a</b>          | <i>n</i> -Bu <sub>3</sub> NF (2.0 equiv), MS 4A, THF (0.10 M), 60 °C, 16 h                                                                                         | <b>6a'</b> , full desilylation |
| 5     | <b>2a</b>          | CsF (2.0 equiv), MeCN, 60 °C                                                                                                                                       | <b>6a'</b> , full desilylation |
| 6     | <b>2a</b>          | KOTMS (2.0 equiv), MeCN (0.10 M), 23 °C, 16 h                                                                                                                      | <b>6a'</b> , full desilylation |
| 7     | <b>2a</b>          | CsF (2.0 equiv), Ir[(ppy) <sub>2</sub> dtbbpy]PF <sub>6</sub> (1 mol %), MeCN/TFE (9:1, 0.05 M), 23 °C, blue light, 16 h                                           | imine + partial desilylation   |
| 8     | <b>2a</b>          | KOTMS (2.0 equiv), Ir[(ppy) <sub>2</sub> dtbbpy]PF <sub>6</sub> (1 mol %), MeCN/TFE (9:1, 0.05 M), 23 °C, blue light, 16 h                                         | <b>6a'</b> , full desilylation |
| 9     | <b>2a</b>          | TMSOTf (1.0 equiv), Ir[(ppy) <sub>2</sub> dtbbpy]PF <sub>6</sub> (1 mol %), MeCN (0.10 M), 23 °C, blue light, 16 h                                                 | mostly imine recovered         |
| 10    | <b>2a</b>          | TMSOTf (2.0 equiv), Ir[(ppy) <sub>2</sub> dtbbpy]PF <sub>6</sub> (1 mol %), MeCN (0.10 M), 23 °C, blue light, 16 h                                                 | <b>6a</b> , 34% <sup>c</sup>   |
| 11    | <b>2a</b>          | BF <sub>3</sub> •MeCN (2.0 equiv), Ir[(ppy) <sub>2</sub> dtbbpy]PF <sub>6</sub> (1 mol %), MeCN (0.10 M), 23 °C, blue light, 16 h                                  | <b>6a</b> , 36% <sup>c</sup>   |
| 12    | <b>2a</b>          | Bi(OTf) <sub>3</sub> (2.0 equiv), Ir[(ppy) <sub>2</sub> dtbbpy]PF <sub>6</sub> (1 mol %), MeCN (0.10 M), 23 °C, blue light, 16 h                                   | <b>6a</b> , 56% <sup>c</sup>   |
| 13    | <b>2a</b>          | Cu(OTf) <sub>2</sub> (2.0 equiv), Ir[(ppy) <sub>2</sub> dtbbpy]PF <sub>6</sub> (1 mol %), MeCN (0.10 M), 23 °C, blue light, 16 h                                   | <b>6a</b> , 42% <sup>c</sup>   |
| 14    | <b>2a</b>          | Bi(OTf) <sub>3</sub> (1.0 equiv), Cu(OTf) <sub>2</sub> (1.0 equiv), Ir[(ppy) <sub>2</sub> dtbbpy]PF <sub>6</sub> (1 mol %), MeCN (0.10 M), 23 °C, blue light, 16 h | <b>6a</b> , 47% <sup>c</sup>   |
| 15    | <b>2a</b>          | Bi(OTf) <sub>3</sub> (0.5 equiv), Cu(OTf) <sub>2</sub> (1.0 equiv), Ir[(ppy) <sub>2</sub> dtbbpy]PF <sub>6</sub> (1 mol %), MeCN (0.10 M), 23 °C, blue light, 16 h | <b>6a</b> , 46% <sup>c</sup>   |
| 16    | <b>2a</b>          | Cu(OTf) <sub>2</sub> (2.0 equiv), MeCN (0.10 M), 60 °C, 16 h                                                                                                       | <b>6a</b> , 45% <sup>c</sup>   |
| 17    | <b>2a</b>          | Other Lewis acids (TMSOTf, BF <sub>3</sub> •MeCN, or Bi(OTf) <sub>3</sub> , 2.0 equiv), MeCN (0.10 M), 60 °C, 16 h                                                 | imine + hydrolysis             |
| 18    | <b>2a</b>          | Cu(OTf) <sub>2</sub> (2.0 equiv), MeCN (0.10 M), 23 °C, blue light, 16 h                                                                                           | <b>6a</b> , 40% <sup>c</sup>   |
| 19    | <b>2a</b>          | (Cu <sup>I</sup> OTf) <sub>2</sub> •toluene (2.0 equiv), MeCN (0.10 M), 23 °C, blue light, 16 h                                                                    | imine recovered                |

<sup>a</sup>Imine formation was performed with 4-fluorobenzaldehyde and MS 4A in CH<sub>2</sub>Cl<sub>2</sub>. <sup>b</sup>Isolated yield under 0.5 mmol scale. <sup>c</sup>Calculated yield from <sup>1</sup>H NMR measurement of unpurified reaction mixture under 0.1 mmol scale with 1,3,5-trimethoxybenzene as an additional internal standard. BL = blue light; dtbbpy = 4,4'-di-*tert*-butyl-2,2'-bipyridine; dF(CF<sub>3</sub>)ppy = 2-(2,4-difluorophenyl)-5-(trifluoromethyl)pyridine; HFIP = 1,1,1,3,3,3-hexafluoro-2-propanol; ppy = 2-phenylpyridine; TFE = 2,2,2-trifluoroethanol.



## 3-(4-Fluorophenyl)thiomorpholine (6a) (Table S1, entry 4)

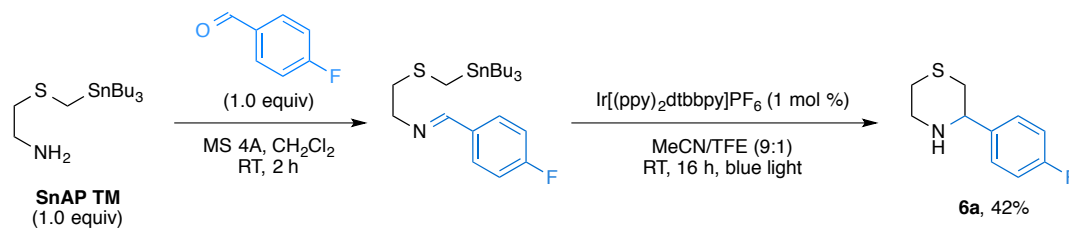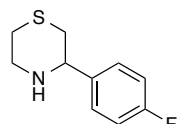

A mixture of the SnAP reagent **SnAP TM** (190.1 mg, 0.5 mmol, 1.0 equiv), 4-fluorobenzaldehyde (54.0 mL, 0.5 mmol, 1.0 equiv), and MS 4A (100.0 mg) in  $\text{CH}_2\text{Cl}_2$  (1.0 mL, 0.5 M) under  $\text{N}_2$  was stirred 2 h at room temperature. The reaction was filtered through Celite and washed with  $\text{CH}_2\text{Cl}_2$ . The filtrate was condensed under *vacuo* and the residue was re-dissolved in MeCN/TFE (9:1, 10 mL, 0.05 M) in a vial (20 mL), followed by the addition of  $\text{Ir}[(\text{ppy})_2\text{dtbbpy}]\text{PF}_6$  (4.6 mg, 5.0  $\mu\text{mol}$ , 0.01 equiv). The vial was closed, and the reaction was stirred for 16 h at room temperature under the exposure of blue LEDs with a cooling fan to maintain the temperature.  $\text{H}_2\text{O}$  (0.1 mL) was added and the reaction was stirred for another 5 min. After the solvents were removed under *vacuo*, the residue was dissolved in  $\text{CH}_2\text{Cl}_2$ , dried over  $\text{Na}_2\text{SO}_4$ , filtered, and condensed under *vacuo*. The residue was purified by flash column chromatography (10–50% EtOAc in hexanes) to afford the desired product (41.3 mg, 42%) with spectral characteristics identical to those previously reported.<sup>13</sup>

$^1\text{H NMR}$  (400 MHz,  $\text{CDCl}_3$ ):  $\delta$  [ppm] = 7.38–7.28 (m, 2 H), 7.08–6.94 (m, 2 H), 3.90 (dd,  $J$  = 10.6, 2.3 Hz, 1 H), 3.42 (dt,  $J$  = 12.5, 3.0 Hz, 1 H), 3.15 (td,  $J$  = 11.9, 2.3 Hz, 1 H), 2.88 (ddd,  $J$  = 13.4, 11.7, 3.0 Hz, 1 H), 2.78 (dd,  $J$  = 13.3, 10.5 Hz, 1 H), 2.42 (dddd,  $J$  = 9.4, 8.0, 4.8, 2.4 Hz, 2 H), 1.91 (br, 1 H);  $^{13}\text{C NMR}$  (100 MHz,  $\text{CDCl}_3$ ):  $\delta$  [ppm] = 162.2 (d,  $J$  = 245.8 Hz), 140.1 (d,  $J$  = 3.2 Hz), 128.2 (d,  $J$  = 8.0 Hz), 115.5 (d,  $J$  = 21.2 Hz), 62.3, 49.2, 35.0, 27.5.

### 3.3 General procedure

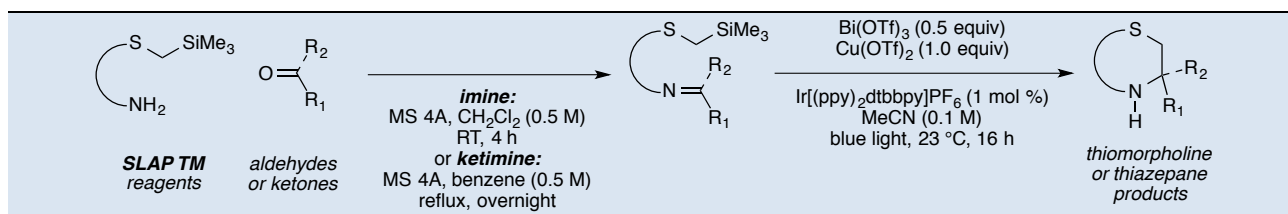

#### General condition for imine formation:

A mixture of a SLAP reagent (0.5 mmol), an aldehyde (0.5 mmol), and MS 4A (100.0 mg) in  $\text{CH}_2\text{Cl}_2$  (1.0 mL, 0.5 M) under  $\text{N}_2$  was stirred at room temperature 4 h. The reaction was filtered through Celite and washed with  $\text{CH}_2\text{Cl}_2$ . The filtrate was condensed under *vacuo* and used directly for cyclization.

#### General condition for ketimine formation:

A mixture of a SLAP reagent (0.5 mmol), a ketone (0.5 mmol), and MS 4A (100.0 mg) in benzene (1.0 mL, 0.5 M) under  $\text{N}_2$  was stirred at reflux overnight. The reaction was filtered through Celite and washed with  $\text{CH}_2\text{Cl}_2$ . The filtrate was condensed under *vacuo* and used directly for cyclization.

#### General condition for photo-cyclization:

The reaction was carried out in a closed vial (7 mL) with no need to be degassed beforehand or under dry conditions. To a solution of the corresponding imine or ketimine (0.5 mmol, 1.00 equiv) in MeCN (5.0 mL, 0.05 M),  $\text{Cu}(\text{OTf})_2$  (180.8 mg, 0.50 mmol, 1.00 equiv),  $\text{Bi}(\text{OTf})_3$  (160.4 mg, 0.25 mmol, 0.5 equiv), and  $\text{Ir}[(\text{ppy})_2\text{dtbbpy}]\text{PF}_6$  (4.6 mg, 5.00  $\mu\text{mol}$ , 0.01 equiv) were added. The reaction was stirred for 16 or 48 h at room temperature under the exposure of blue LEDs (30 W) with a cooling fan to maintain the temperature.  $\text{NH}_3(\text{aq})$  (1 mL, ca. 12 M) was added and the reaction was stirred for another 10 min. After the solvents were removed under *vacuo*, the residue was re-dissolved in  $\text{CH}_2\text{Cl}_2/\text{NH}_3(\text{aq})$  and filtered through Celite. The filtrate was extracted with  $\text{CH}_2\text{Cl}_2$  and the combined organic layers were washed with  $\text{NH}_3(\text{aq})$ . The final organic extracts were dried over  $\text{Na}_2\text{SO}_4$ , filtered, and condensed under *vacuo*. The residue was purified by flash column chromatography to afford the desired thiomorpholine product.

### 3.4 Substrate scope with non-heterocyclic aldehydes and ketones (Scheme 2)

#### 3-(4-(Trifluoromethyl)phenyl)thiomorpholine (6b) (Scheme 2)

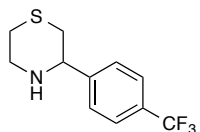

The photomediated synthesis of **6b** followed the general procedure with **1a** (81.7 mg, 0.5 mmol, 1.0 equiv) and 4-(trifluoromethyl)benzaldehyde (68.3  $\mu$ L, 0.5 mmol, 1.0 equiv) for 16 h. The desired product (83.3 mg, 67%) was obtained by flash column chromatography (10–50% EtOAc in hexanes) with spectral characteristics identical to those previously reported.<sup>13</sup>

**<sup>1</sup>H NMR** (400 MHz, CDCl<sub>3</sub>):  $\delta$  [ppm] = 7.66–7.54 (m, 1 H), 7.54–7.43 (m, 1 H), 3.99 (dd,  $J$  = 10.5, 2.2 Hz, 1 H), 3.57–3.33 (m, 1 H), 3.16 (td,  $J$  = 11.9, 2.3 Hz, 1 H), 2.89 (ddd,  $J$  = 12.9, 11.7, 3.0 Hz, 1 H), 2.78 (dd,  $J$  = 13.3, 10.6 Hz, 1 H), 2.45 (ddt,  $J$  = 11.9, 10.9, 2.4 Hz, 1 H), 1.82 (br, 1 H); **<sup>13</sup>C NMR** (100 MHz, CDCl<sub>3</sub>):  $\delta$  [ppm] = 148.2 (q,  $J$  = 1.4 Hz), 130.0 (q,  $J$  = 32.4 Hz), 127.1, 125.7 (q,  $J$  = 3.8 Hz), 124.2 (q,  $J$  = 272.0 Hz), 62.6, 49.0, 35.0, 27.5; **<sup>19</sup>F NMR** (377 MHz, CDCl<sub>3</sub>):  $\delta$  [ppm] = –62.5.

#### 3-(4-Nitrophenyl)thiomorpholine (6c) (Scheme 2)

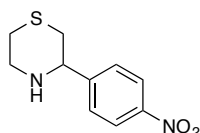

The photomediated synthesis of **6c** followed the general procedure with **1a** (81.7 mg, 0.5 mmol, 1.0 equiv) and 4-nitrobenzaldehyde (75.6 mg, 0.5 mmol, 1.0 equiv) for 16 h. The desired product (83.5 mg, 74%) was obtained by flash column chromatography (30–70% EtOAc in hexanes) as yellowish solids.

**m.p.**: 125–126 °C; **<sup>1</sup>H NMR** (400 MHz, CDCl<sub>3</sub>):  $\delta$  [ppm] = 8.23–8.02 (m, 2 H), 7.69–7.43 (m, 2 H), 4.02 (dd,  $J$  = 10.4, 2.3 Hz, 1 H), 3.43 (dt,  $J$  = 11.8, 3.0 Hz, 1 H), 3.14 (td,  $J$  = 11.9, 2.3 Hz, 1 H), 2.86 (ddd,  $J$  = 13.3, 11.7, 3.0 Hz, 1 H), 2.73 (dd,  $J$  = 13.2, 10.5 Hz, 1 H), 2.52–2.32 (m, 2 H), 1.84 (br, 1 H); **<sup>13</sup>C NMR** (100 MHz, CDCl<sub>3</sub>):  $\delta$  [ppm] = 151.4, 147.4, 127.5, 123.9, 62.2, 48.7, 34.8, 27.4; **HRMS** (ESI): calculated for [C<sub>10</sub>H<sub>13</sub>N<sub>2</sub>O<sub>2</sub>S]<sup>+</sup>:  $m/z$  = 225.0692, found:  $m/z$  = 225.0693; **IR** (v/cm<sup>-1</sup>, neat): 3325, 2940, 2901, 2815, 1596, 1516, 1350, 1310, 1109, 985, 856, 845, 735.

#### Methyl 4-(thiomorpholin-3-yl)benzoate (6d) (Scheme 2)

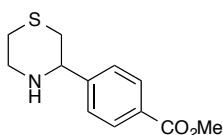

The photomediated synthesis of **6d** followed the general procedure with **1a** (81.7 mg, 0.5 mmol, 1.0 equiv) and methyl 4-formylbenzoate (82.1 mg, 0.5 mmol, 1.0 equiv) for 16 h. The desired product (84.6 mg, 71%) was obtained by flash column chromatography (30–70% EtOAc in hexanes) with spectral characteristics identical to those previously reported.<sup>13</sup>

**<sup>1</sup>H NMR** (400 MHz, CDCl<sub>3</sub>):  $\delta$  [ppm] = 7.99–7.92 (m, 2 H), 7.42–7.38 (m, 2 H), 3.95 (dd,  $J$  = 10.5, 2.2 Hz, 1 H), 3.87 (s, 3 H), 3.46–3.38 (m, 1 H), 3.13 (td,  $J$  = 11.9, 2.3 Hz, 1 H), 2.92–2.82 (m, 1 H), 2.80–2.71 (m, 1 H), 2.42 (ddt,  $J$  = 13.2, 12.4, 2.3 Hz, 2 H), 1.83 (s, 1 H); **<sup>13</sup>C NMR** (100 MHz, CDCl<sub>3</sub>):  $\delta$  [ppm] = 166.8, 149.2, 130.0, 129.6, 126.6, 62.6, 52.1, 49.0, 34.8, 27.5.

#### 3-(4-Methoxyphenyl)thiomorpholine (6e) (Scheme 2)

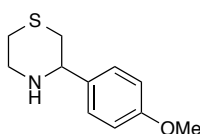

The photomediated synthesis of **6e** followed the general procedure with **1a** (81.7 mg, 0.5 mmol, 1.0 equiv) and 4-methoxybenzaldehyde (60.8  $\mu$ L, 0.5 mmol, 1.0 equiv) for 16 h. The desired product (51.7 mg, 49%) was obtained by flash column chromatography (30–70% EtOAc in hexanes) with spectral characteristics identical to those previously reported.<sup>13</sup>

**<sup>1</sup>H NMR** (400 MHz, CDCl<sub>3</sub>):  $\delta$  [ppm] = 7.34–7.23 (m, 2 H), 6.91–6.81 (m, 2 H), 3.87 (dd,  $J$  = 10.6, 2.2 Hz, 1 H), 3.79 (s, 3 H), 3.43 (dt,  $J$  = 12.3, 3.2 Hz, 1 H), 3.16 (td,  $J$  = 11.9, 2.3 Hz, 1 H), 2.89 (ddd,  $J$  = 12.9, 11.6,

3.0 Hz, 1 H), 2.81 (dd,  $J = 13.2, 10.7$  Hz, 1 H), 2.43 (ddt,  $J = 13.1, 11.9, 2.3$  Hz, 2 H), 1.81 (s, 1 H);  $^{13}\text{C}$  NMR (100 MHz,  $\text{CDCl}_3$ ):  $\delta$  [ppm] = 159.0, 136.6, 127.6, 113.9, 62.4, 55.3, 49.3, 35.0, 27.5.

### *N*-(4-(Thiomorpholin-3-yl)phenyl)acetamide (**6f**) (Scheme 2)

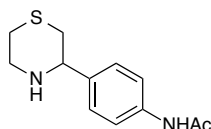

The photomediated synthesis of **6f** followed the general procedure with **1a** (81.7 mg, 0.5 mmol, 1.0 equiv) and *N*-(4-formylphenyl)acetamide (86.1 mg, 0.5 mmol, 1.0 equiv) for 16 h. The desired product (71.2 mg, 60%) was obtained by flash column chromatography (EtOAc: $\text{CH}_2\text{Cl}_2 = 2:1$  to EtOAc: $\text{CH}_2\text{Cl}_2$ :MeOH = 2:1:0.3) with spectral characteristics identical to those previously reported.<sup>14</sup>

$^1\text{H}$  NMR (400 MHz,  $\text{CDCl}_3$ ):  $\delta$  [ppm] = 7.67 (br, 1 H), 7.46–7.40 (m, 2 H), 7.30–7.24 (m, 2 H), 3.87 (dd,  $J = 10.6, 2.2$  Hz, 1 H), 3.42 (dt,  $J = 12.1, 3.0$  Hz, 1 H), 3.14 (td,  $J = 11.9, 2.3$  Hz, 1 H), 2.87 (ddd,  $J = 13.4, 11.7, 3.0$  Hz, 1 H), 2.77 (dd,  $J = 13.4, 10.6$  Hz, 1 H), 2.46–2.36 (m, 2 H), 2.13 (s, 3 H), 1.94 (br, 1 H);  $^{13}\text{C}$  NMR (100 MHz,  $\text{CDCl}_3$ ):  $\delta$  [ppm] = 168.7, 140.2, 137.4, 127.2, 120.3, 62.5, 49.2, 34.9, 27.5, 24.6.

### 3-Mesitylthiomorpholine (**6g**) (Scheme 2)

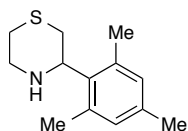

The photomediated synthesis of **6g** followed the general procedure with **1a** (81.7 mg, 0.5 mmol, 1.0 equiv) and 2,4,6-trimethylbenzaldehyde (73.7  $\mu\text{L}$ , 0.5 mmol, 1.0 equiv) for 16 h. The desired product (26.2 mg, 24%) was obtained by flash column chromatography (hexanes to 20% EtOAc in hexanes) as pale yellow solids.

**m.p.:** 58–59 °C;  $^1\text{H}$  NMR (400 MHz,  $\text{CDCl}_3$ ):  $\delta$  [ppm] = 6.84 (s, 2 H), 4.41 (dd,  $J = 10.9, 2.5$  Hz, 1 H), 3.47 (dt,  $J = 11.7, 3.1$  Hz, 1 H), 3.30 (dd,  $J = 13.1, 10.9$  Hz, 1 H), 3.14 (td,  $J = 11.7, 2.2$  Hz, 1 H), 2.94 (ddd,  $J = 13.0, 11.7, 2.9$  Hz, 1 H), 2.51 (br, 6 H), 2.42 (dq,  $J = 12.9, 2.4$  Hz, 1 H), 2.29 (dd,  $J = 13.2, 2.3$  Hz, 1 H), 2.26 (s, 3 H), 1.62 (s, 1 H);  $^{13}\text{C}$  NMR (100 MHz,  $\text{CDCl}_3$ ):  $\delta$  [ppm] = 136.8, 136.7, 136.6, 130.3, 60.3, 50.2, 30.2, 27.8, 21.6, 20.8; **HRMS** (ESI): calculated for  $[\text{C}_{13}\text{H}_{20}\text{NS}]^+$ :  $m/z = 222.1311$ , found:  $m/z = 222.1315$ ; **IR** ( $\text{v}/\text{cm}^{-1}$ , neat): 3321, 2921, 2822, 1610, 1445, 1416, 1317, 1290, 1115, 984, 852, 712.

### 3-(Thiophen-3-yl)thiomorpholine (**6h**) (Scheme 2)

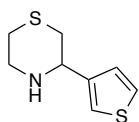

The photomediated synthesis of **6h** followed the general procedure with **1a** (81.7 mg, 0.5 mmol, 1.0 equiv) and thiophene-3-carbaldehyde (45.7  $\mu\text{L}$ , 0.5 mmol, 1.0 equiv) for 16 h. The desired product (49.7 mg, 54%) was obtained by flash column chromatography (10–50% EtOAc in hexanes) with spectral characteristics identical to those previously reported.<sup>13</sup>

$^1\text{H}$  NMR (400 MHz,  $\text{CDCl}_3$ ):  $\delta$  [ppm] = 7.29 (dd,  $J = 5.0, 3.0$  Hz, 1 H), 7.20 (dt,  $J = 2.8, 1.2$  Hz, 1 H), 7.08 (dd,  $J = 4.9, 1.3$  Hz, 1 H), 4.07 (dd,  $J = 10.5, 2.4$  Hz, 1 H), 3.43 (dt,  $J = 12.3, 3.1$  Hz, 1 H), 3.15 (td,  $J = 11.9, 2.4$  Hz, 1 H), 2.94–2.73 (m, 2 H), 2.56 (dt,  $J = 13.1, 2.3$  Hz, 1 H), 2.42 (dq,  $J = 13.2, 2.5$  Hz, 1 H), 1.90 (s, 1 H);  $^{13}\text{C}$  NMR (100 MHz,  $\text{CDCl}_3$ ):  $\delta$  [ppm] = 145.3, 126.1, 126.0, 120.6, 58.3, 49.0, 34.5, 27.5.

### (*E*)-3-Styrylthiomorpholine (**6i**) (Scheme 2)

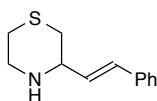

The photomediated synthesis of **6i** followed the general procedure with **1a** (81.7 mg, 0.5 mmol, 1.0 equiv) and 3-methyl-2-butenal (62.9  $\mu\text{L}$ , 0.5 mmol, 1.0 equiv) for 16 h. The desired product (32.8 mg, 32%) was obtained by flash column chromatography (50–80% EtOAc in hexanes) as pale yellow solids.

**m.p.:** 93–94 °C;  $^1\text{H}$  NMR (400 MHz,  $\text{CDCl}_3$ ):  $\delta$  [ppm] = 7.38–7.27 (m, 4 H), 7.26–7.21 (m, 1 H), 6.57 (dd,  $J = 16.0, 1.1$  Hz, 1 H), 6.18 (dd,  $J = 16.0, 7.0$  Hz, 1 H), 3.62–3.52 (m, 1 H), 3.40 (dt,  $J = 12.2, 3.1$  Hz, 1 H), 3.10 (td,  $J = 11.9, 2.4$  Hz, 1 H), 2.80 (ddd,  $J = 13.2, 11.5, 3.0$  Hz, 1 H), 2.67 (dd,  $J = 13.1, 10.2$  Hz, 1 H), 2.50 (dt,  $J = 13.0, 2.2$  Hz, 1 H), 2.45–2.38 (m, 1 H), 1.77 (s, 1 H);  $^{13}\text{C}$  NMR (100 MHz,  $\text{CDCl}_3$ ):  $\delta$  [ppm] =

136.8, 131.7, 130.7, 128.7, 127.8, 126.5, 59.8, 48.2, 33.1, 27.6; **HRMS** (ESI): calculated for  $[C_{12}H_{16}NS]^+$ :  $m/z = 206.0998$ , found:  $m/z = 206.1002$ ; **IR** ( $\nu/cm^{-1}$ , neat): 3308, 3025, 2906, 2820, 1494, 1448, 1415, 1312, 1121, 1016, 967, 761, 736, 693.

### 9-Oxa-4-thia-1-azaspiro[5.5]undecane (6j) (Scheme 2)

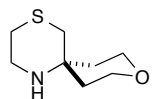

The photomediated synthesis of **6j** was modified from the general procedure with **1a** (81.7 mg, 0.5 mmol, 1.0 equiv), dihydro-2*H*-pyran-4(3*H*)-one (46.2  $\mu$ L, 0.5 mmol, 1.0 equiv), and additional  $BF_3 \cdot MeCN$  (0.8 mL, 1.0 mmol, 2.0 equiv) for 48 h. The desired product (20.1 mg, 23%) was obtained by flash column chromatography (EtOAc:CH<sub>2</sub>Cl<sub>2</sub> = 2:1 to EtOAc:CH<sub>2</sub>Cl<sub>2</sub>:MeOH = 2:1:0.3) as yellowish oil.

**<sup>1</sup>H NMR** (400 MHz, CDCl<sub>3</sub>):  $\delta$  [ppm] = 3.74 (ddd,  $J = 11.6, 7.1, 4.5$  Hz, 2 H), 3.58 (dt,  $J = 12.1, 4.9$  Hz, 2 H), 3.15–3.02 (m, 2 H), 2.54 (s, 2 H), 2.53–2.44 (m, 2 H), 1.86–1.68 (m, 5 H); **<sup>13</sup>C NMR** (100 MHz, CDCl<sub>3</sub>):  $\delta$  [ppm] = 63.5, 47.8, 41.2, 37.4, 36.1, 28.4; **HRMS** (ESI): calculated for  $[C_8H_{16}NOS]^+$ :  $m/z = 174.0947$ , found:  $m/z = 174.0950$ ; **IR** ( $\nu/cm^{-1}$ , neat): 3418, 3302, 2946, 2859, 1660, 1462, 1431, 1298, 1237, 1101, 1028, 1015, 841, 734, 703.

### *trans*-3-(4-(Trifluoromethyl)phenyl)-2-(trimethylsilyl)thiomorpholine (7a) (Scheme 2)

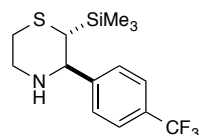

The photomediated synthesis of **7a** followed the general procedure with **1b** (117.8 mg, 0.5 mmol, 1.0 equiv) and 4-(trifluoromethyl)benzaldehyde (68.3  $\mu$ L, 0.5 mmol, 1.0 equiv) for 16 h. The desired product (72.8 mg, 46%, dr > 10:1) was obtained by flash column chromatography (10–30% EtOAc in hexanes) as yellowish oil.

**<sup>1</sup>H NMR** (400 MHz, CDCl<sub>3</sub>):  $\delta$  [ppm] = 7.64–7.52 (m, 2 H), 7.45 (d,  $J = 8.1$  Hz, 2 H), 3.89 (d,  $J = 10.2$  Hz, 1 H), 3.38 (dt,  $J = 12.0, 3.1$  Hz, 1 H), 3.14 (td,  $J = 11.9, 2.4$  Hz, 1 H), 2.93 (ddd,  $J = 12.9, 11.8, 3.2$  Hz, 1 H), 2.55 (d,  $J = 10.2$  Hz, 1 H), 2.42 (dt,  $J = 12.8, 2.6$  Hz, 1 H), 1.68 (s, 1 H), –0.28 (s, 9 H); **<sup>13</sup>C NMR** (100 MHz, CDCl<sub>3</sub>):  $\delta$  [ppm] = 147.9 (q,  $J = 1.4$  Hz), 130.5 (q,  $J = 32.4$  Hz), 128.4, 125.6 (q,  $J = 3.8$  Hz), 124.1 (q,  $J = 272.1$  Hz), 65.5, 49.0, 34.5, 28.8, –2.2; **<sup>19</sup>F NMR** (377 MHz, CDCl<sub>3</sub>):  $\delta$  [ppm] = –62.5; **HRMS** (ESI): calculated for  $[C_{14}H_{21}F_3N_2SSi]^+$ :  $m/z = 320.1111$ , found:  $m/z = 320.1111$ ; **IR** ( $\nu/cm^{-1}$ , neat): 3297, 2954, 2911, 2826, 1675, 1619, 1417, 1326, 1251, 1166, 1126, 1068, 1017, 932, 853, 840, 699.

### *trans*-3-(4-Nitrophenyl)-2-(trimethylsilyl)thiomorpholine (7b) (Scheme 2)

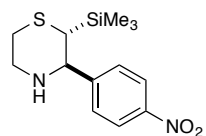

The photomediated synthesis of **7b** followed the general procedure with **1b** (117.8 mg, 0.5 mmol, 1.0 equiv) and 4-nitrobenzaldehyde (75.6 mg, 0.5 mmol, 1.0 equiv) for 16 h. The desired product (64.9 mg, 44%, dr > 10:1) was obtained by flash column chromatography (10–50% EtOAc in hexanes) as yellowish solids.

**m.p.**: 110–111 °C; **<sup>1</sup>H NMR** (400 MHz, CDCl<sub>3</sub>):  $\delta$  [ppm] = 8.16 (d,  $J = 8.8$  Hz, 2 H), 7.52 (d,  $J = 8.8$  Hz, 2 H), 3.95 (d,  $J = 10.2$  Hz, 1 H), 3.50–3.33 (m, 1 H), 3.14 (td,  $J = 11.9, 2.4$  Hz, 1 H), 2.93 (ddd,  $J = 13.0, 11.8, 3.2$  Hz, 1 H), 2.54 (d,  $J = 10.2$  Hz, 1 H), 2.43 (dt,  $J = 12.9, 2.7$  Hz, 1 H), 1.71 (s, 1 H), –0.27 (s, 9 H); **<sup>13</sup>C NMR** (100 MHz, CDCl<sub>3</sub>):  $\delta$  [ppm] = 151.1, 147.7, 129.0, 123.9, 65.1, 48.8, 34.6, 28.8, –2.1; **HRMS** (ESI): calculated for  $[C_{13}H_{21}N_2O_2SSi]^+$ :  $m/z = 297.1088$ , found:  $m/z = 297.1087$ ; **IR** ( $\nu/cm^{-1}$ , neat): 2952, 1604, 1520, 1347, 1313, 1250, 1108, 1014, 932, 841, 698.

### *trans*-3-(4-Fluorophenyl)-2-(trimethylsilyl)thiomorpholine (7c) (Scheme 2)

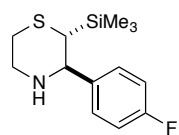

The photomediated synthesis of **7c** followed the general procedure with **1b** (117.8 mg, 0.5 mmol, 1.0 equiv) and 4-fluorobenzaldehyde (54.0  $\mu$ L, 0.5 mmol, 1.0 equiv) for 16 h. The desired product (51.9 mg, 39%, dr > 10:1) was obtained by flash column chromatography (10–30% EtOAc in hexanes) as yellowish oil.

**<sup>1</sup>H NMR** (400 MHz, CDCl<sub>3</sub>): δ [ppm] = 7.35–7.20 (m, 2 H), 7.03–6.92 (m, 2 H), 3.80 (d, *J* = 10.3 Hz, 1 H), 3.36 (ddd, *J* = 12.0, 3.7, 2.4 Hz, 1 H), 3.19–3.07 (m, 1 H), 2.98–2.80 (m, 1 H), 2.50 (dd, *J* = 10.4, 1.1 Hz, 1 H), 2.40 (dt, *J* = 13.0, 2.7 Hz, 1 H), 1.73 (br, 1 H), -0.27 (d, *J* = 1.0 Hz, 9 H); **<sup>13</sup>C NMR** (100 MHz, CDCl<sub>3</sub>): δ [ppm] = 162.5 (d, *J* = 246.4 Hz), 140.0 (d, *J* = 3.3 Hz), 129.5 (d, *J* = 8.0 Hz), 115.5 (d, *J* = 21.1 Hz), , 65.0, 49.2, 34.6, 28.8, -2.2; **HRMS** (ESI): calculated for [C<sub>13</sub>H<sub>21</sub>FNSSi]<sup>+</sup>: *m/z* = 270.1143, found: *m/z* = 270.1144; **IR** (ν/cm<sup>-1</sup>, neat): 3295, 2952, 2924, 2822, 1604, 1509, 1250, 1224, 1156, 1122, 1015, 930, 856, 837.

### 3-(4-(Trifluoromethyl)phenyl)-1,4-thiazepane (8a) (Scheme 2)

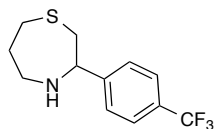

The photomediated synthesis of **8a** followed the general procedure with **1c** (88.7 mg, 0.5 mmol, 1.0 equiv) and 4-(trifluoromethyl)benzaldehyde (68.3 μL, 0.5 mmol, 1.0 equiv) for 48 h. The desired product (56.5 mg, 43%) was obtained by flash column chromatography (10–50% EtOAc in hexanes) as yellowish oil.

**<sup>1</sup>H NMR** (400 MHz, CDCl<sub>3</sub>): δ [ppm] = 7.57 (d, *J* = 8.1 Hz, 2 H), 7.48 (d, *J* = 8.1 Hz, 2 H), 4.03 (dd, *J* = 9.0, 3.9 Hz, 1 H), 3.24–3.05 (m, 2 H), 3.02–2.68 (m, 4 H), 2.06 (ddt, *J* = 14.4, 10.1, 5.1 Hz, 1 H), 1.97–1.78 (m, 2 H); **<sup>13</sup>C NMR** (100 MHz, CDCl<sub>3</sub>): δ [ppm] = 148.6 (q, *J* = 1.4 Hz), 129.7 (q, *J* = 32.4 Hz), 127.1, 125.6 (q, *J* = 3.7 Hz), 124.3 (q, *J* = 271.9 Hz), 66.8, 47.0, 43.3, 33.7, 33.0; **<sup>19</sup>F NMR** (377 MHz, CDCl<sub>3</sub>): δ [ppm] = -62.5; **HRMS** (ESI): calculated for [C<sub>12</sub>H<sub>15</sub>F<sub>3</sub>NS]<sup>+</sup>: *m/z* = 262.0872, found: *m/z* = 262.0875; **IR** (ν/cm<sup>-1</sup>, neat): 2922, 2846, 1618, 1416, 1326, 1164, 1124, 1067, 1017, 845, 723.

### 3-(1,4-Thiazepan-3-yl)benzonitrile (8b) (Scheme 2)

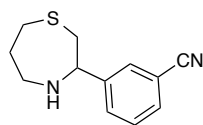

The photomediated synthesis of **8b** followed the general procedure with **1c** (88.7 mg, 0.5 mmol, 1.0 equiv) and 3-cyanobenzaldehyde (65.6 mg, 0.5 mmol, 1.0 equiv) for 48 h. The desired product (54.6 mg, 50%) was obtained by flash column chromatography (10–50% EtOAc in hexanes) as yellowish oil.

**<sup>1</sup>H NMR** (400 MHz, CDCl<sub>3</sub>): δ [ppm] = 7.69 (d, *J* = 1.7 Hz, 1 H), 7.59 (dt, *J* = 7.8, 1.6 Hz, 1 H), 7.52 (dt, *J* = 7.7, 1.4 Hz, 1 H), 7.41 (t, *J* = 7.8 Hz, 1 H), 4.01 (dd, *J* = 8.7, 4.0 Hz, 1 H), 3.19–3.01 (m, 2 H), 2.95 (ddd, *J* = 14.5, 4.1, 0.9 Hz, 1 H), 2.91–2.67 (m, 3 H), 2.04 (ddq, *J* = 14.7, 10.2, 5.2 Hz, 1 H), 1.97–1.79 (m, 2 H); **<sup>13</sup>C NMR** (100 MHz, CDCl<sub>3</sub>): δ [ppm] = 146.1, 131.3, 131.1, 130.5, 129.4, 118.9, 112.7, 65.7, 46.7, 43.0, 33.8, 33.1; **HRMS** (ESI): calculated for [C<sub>12</sub>H<sub>15</sub>N<sub>2</sub>S]<sup>+</sup>: *m/z* = 219.0950, found: *m/z* = 219.0953; **IR** (ν/cm<sup>-1</sup>, neat): 3342, 2918, 2846, 2228, 1668, 1581, 1479, 1429, 1335, 1130, 900, 808, 692.

### 3-(3-Bromophenyl)-1,4-thiazepane (8c) (Scheme 2)

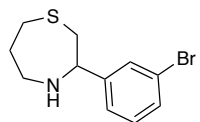

The photomediated synthesis of **8c** followed the general procedure with **1c** (88.7 mg, 0.5 mmol, 1.0 equiv) and 3-bromobenzaldehyde (58.3 μL, 0.5 mmol, 1.0 equiv) for 48 h. The desired product (61.3 mg, 45%) was obtained by flash column chromatography (10–30% EtOAc in hexanes) as yellowish oil.

**<sup>1</sup>H NMR** (400 MHz, CDCl<sub>3</sub>): δ [ppm] = 7.53 (t, *J* = 1.9 Hz, 1 H), 7.37 (ddd, *J* = 7.9, 2.1, 1.1 Hz, 1 H), 7.33–7.23 (m, 1 H), 7.18 (t, *J* = 7.8 Hz, 1 H), 3.92 (dd, *J* = 9.2, 3.8 Hz, 1 H), 3.23–3.03 (m, 2 H), 2.96–2.70 (m, 4 H), 2.13–1.97 (m, 1 H), 1.87 (ddd, *J* = 13.8, 10.1, 6.2, 4.0 Hz, 2 H). **<sup>13</sup>C NMR** (100 MHz, CDCl<sub>3</sub>): δ [ppm] = 146.9, 130.5, 130.3, 129.8, 125.4, 122.8, 66.9, 47.1, 43.4, 33.5, 32.9; **HRMS** (ESI): calculated for [C<sub>11</sub>H<sub>15</sub>BrNS]<sup>+</sup>: *m/z* = 272.0103, found: *m/z* = 272.0104; **IR** (ν/cm<sup>-1</sup>, neat): 3311, 2920, 2844, 1593, 1567, 1473, 1422, 1333, 1130, 1070, 997, 878, 789, 754, 694.

### 3.5 Substrate scope with heterocyclic aldehydes (Scheme 3)

#### 3-(Pyridin-4-yl)thiomorpholine (6k) (Scheme 3)

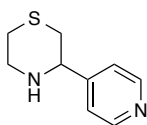

The photomediated synthesis of **6k** followed the general procedure with **1a** (81.7 mg, 0.5 mmol, 1.0 equiv), 4-pyridinecarboxaldehyde (47.1  $\mu$ L, 0.5 mmol, 1.0 equiv), and additional  $\text{BF}_3 \cdot \text{MeCN}$  (0.8 mL, 1.0 mmol, 2.0 equiv) for 16 h. The desired product (83.3 mg, 67%) was obtained by flash column chromatography (EtOAc:CH<sub>2</sub>Cl<sub>2</sub> = 1:1 to EtOAc:CH<sub>2</sub>Cl<sub>2</sub>:MeOH = 1:1:0.5) with spectral characteristics identical to those previously reported.<sup>13</sup>

**<sup>1</sup>H NMR** (400 MHz, CDCl<sub>3</sub>):  $\delta$  [ppm] = 8.79–8.36 (m, 2 H), 7.39–7.10 (m, 2 H), 3.94 (dd,  $J$  = 10.5, 2.3 Hz, 1 H), 3.45 (dt,  $J$  = 12.2, 3.1 Hz, 1 H), 3.15 (td,  $J$  = 11.9, 2.3 Hz, 1 H), 2.89 (ddd,  $J$  = 13.1, 11.7, 3.0 Hz, 1 H), 2.76 (dd,  $J$  = 13.1, 10.5 Hz, 1 H), 2.46 (ddt,  $J$  = 17.8, 10.7, 2.4 Hz, 2 H), 2.08 (br, 1 H); **<sup>13</sup>C NMR** (100 MHz, CDCl<sub>3</sub>):  $\delta$  [ppm] = 152.4, 150.3, 121.7, 61.7, 48.7, 34.5, 27.4.

#### 3-(2-Phenylpyrimidin-5-yl)thiomorpholine (6l) (Scheme 3)

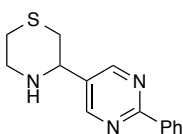

The photomediated synthesis of **6l** followed the general procedure with **1a** (81.7 mg, 0.5 mmol, 1.0 equiv), 2-phenylpyrimidine-5-carbaldehyde (92.1 mg, 0.5 mmol, 1.0 equiv), and additional  $\text{BF}_3 \cdot \text{MeCN}$  (1.2 mL, 1.5 mmol, 3.0 equiv) for 16 h. The desired product (96.0 mg, 75%) was obtained by flash column chromatography (30–70% EtOAc in hexanes) as pale yellow solids.

**m.p.**: 138–139 °C; **<sup>1</sup>H NMR** (400 MHz, CDCl<sub>3</sub>):  $\delta$  [ppm] = 8.75 (s, 2 H), 8.51–8.31 (m, 2 H), 7.58–7.38 (m, 3 H), 3.95 (dd,  $J$  = 10.6, 2.3 Hz, 1 H), 3.42 (dt,  $J$  = 12.2, 3.1 Hz, 1 H), 3.12 (td,  $J$  = 11.9, 2.3 Hz, 1 H), 2.98–2.73 (m, 2 H), 2.58–2.34 (m, 2 H), 1.89 (br, 1 H); **<sup>13</sup>C NMR** (100 MHz, CDCl<sub>3</sub>):  $\delta$  [ppm] = 164.3, 155.9, 137.4, 134.5, 130.8, 128.7, 128.2, 58.3, 48.8, 34.6, 27.4; **HRMS** (ESI): calculated for [C<sub>14</sub>H<sub>16</sub>N<sub>3</sub>S]<sup>+</sup>:  $m/z$  = 258.1059, found:  $m/z$  = 258.1063; **IR** (v/cm<sup>-1</sup>, neat): 3302, 2932, 2900, 1582, 1545, 1430, 1315, 1120, 785, 748, 693.

#### 3-(1-Benzyl-1*H*-imidazol-5-yl)thiomorpholine (6m) (Scheme 3)

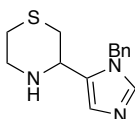

The photomediated synthesis of **6m** followed the general procedure with **1a** (81.7 mg, 0.5 mmol, 1.0 equiv), 1-benzyl-1*H*-imidazole-5-carboxaldehyde (93.1 mg, 0.5 mmol, 1.0 equiv), and additional  $\text{BF}_3 \cdot \text{MeCN}$  (1.2 mL, 1.5 mmol, 3.0 equiv). The desired product (108.6 mg, 84%) was obtained by flash column chromatography (EtOAc:CH<sub>2</sub>Cl<sub>2</sub> = 1:1 to EtOAc:CH<sub>2</sub>Cl<sub>2</sub>:MeOH = 1:1:0.5) as yellowish oil.

**<sup>1</sup>H NMR** (400 MHz, CDCl<sub>3</sub>):  $\delta$  [ppm] = 7.47 (d,  $J$  = 1.1 Hz, 1 H), 7.38–7.26 (m, 3 H), 7.12–7.06 (m, 2 H), 6.99 (s, 1 H), 5.29 (d,  $J$  = 15.7 Hz, 1 H), 5.18 (d,  $J$  = 15.7 Hz, 1 H), 3.85 (dd,  $J$  = 10.5, 2.3 Hz, 1 H), 3.31 (dt,  $J$  = 13.0, 3.0 Hz, 1 H), 2.97 (ddd,  $J$  = 12.9, 11.6, 2.5 Hz, 1 H), 2.80 (dd,  $J$  = 13.2, 10.5 Hz, 1 H), 2.71 (ddd,  $J$  = 13.4, 11.7, 3.0 Hz, 1 H), 2.40 (dt,  $J$  = 13.2, 2.1 Hz, 1 H), 2.32 (dq,  $J$  = 13.3, 2.5 Hz, 1 H), 2.03 (br, 1 H); **<sup>13</sup>C NMR** (100 MHz, CDCl<sub>3</sub>):  $\delta$  [ppm] = 138.4, 136.5, 133.5, 129.1, 128.2, 126.8, 126.7, 52.8, 48.9, 48.1, 31.9, 27.3; **HRMS** (ESI): calculated for [C<sub>14</sub>H<sub>18</sub>N<sub>3</sub>S]<sup>+</sup>:  $m/z$  = 260.1216, found:  $m/z$  = 260.1219; **IR** (v/cm<sup>-1</sup>, neat): 3291, 2911, 1667, 1496, 1454, 1418, 1359, 1245, 1227, 1114, 1028, 929, 734, 713.

#### 6-Phenyl-5-(thiomorpholin-3-yl)-2,3-dihydroimidazo[2,1-*b*]thiazole (6n) (Scheme 3)

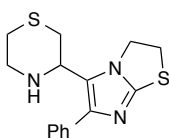

The photomediated synthesis of **6n** followed the general procedure with **1a** (81.7 mg, 0.5 mmol, 1.0 equiv), 6-phenyl-2,3-dihydroimidazo[2,1-*b*]thiazole-5-carbaldehyde (115.1 mg, 0.5 mmol, 1.0 equiv), and additional  $\text{BF}_3 \cdot \text{MeCN}$  (1.2 mL, 1.5 mmol, 3.0 equiv) for 16 h. The desired product (83.3 mg, 55%) was obtained by flash column chromatography (30% EtOAc in hexanes to EtOAc) as yellowish oil.

**<sup>1</sup>H NMR** (400 MHz, CDCl<sub>3</sub>): δ [ppm] = 7.54–7.45 (m, 2 H), 7.39 (dd, *J* = 8.5, 6.9 Hz, 2 H), 7.32–7.22 (m, 1 H), 4.58 (ddd, *J* = 11.1, 7.5, 6.1 Hz, 1 H), 4.32 (dd, *J* = 11.0, 2.4 Hz, 1 H), 4.23 (dt, *J* = 11.1, 7.6 Hz, 1 H), 3.87–3.70 (m, 2 H), 3.35 (dt, *J* = 11.8, 3.1 Hz, 1 H), 3.05 (td, *J* = 11.7, 2.2 Hz, 1 H), 2.98 (dd, *J* = 13.1, 10.9 Hz, 1 H), 2.85 (ddd, *J* = 13.1, 11.7, 2.9 Hz, 1 H), 2.53 (dt, *J* = 13.1, 2.3 Hz, 1 H), 2.40 (dq, *J* = 13.2, 2.5 Hz, 1 H), 1.99 (br, 1 H); **<sup>13</sup>C NMR** (100 MHz, CDCl<sub>3</sub>): δ [ppm] = 149.9, 143.7, 134.6, 128.6, 128.3, 127.9, 127.1, 53.9, 49.2, 47.8, 35.1, 32.2, 27.6; **HRMS** (ESI): calculated for [C<sub>15</sub>H<sub>18</sub>N<sub>3</sub>S<sub>2</sub>]<sup>+</sup>: *m/z* = 304.0937, found: *m/z* = 304.0938; **IR** (ν/cm<sup>-1</sup>, neat): 3056, 2922, 2850, 1716, 1671, 1603, 1577, 1550, 1493, 1461, 1443, 1407, 1344, 1278, 1115, 1023, 910, 773, 731, 701, 671.

### 3-(1-Methyl-1*H*-imidazol-2-yl)thiomorpholine (6o) (Scheme 3)

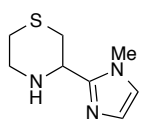

The photomediated synthesis of **6o** followed the general procedure with **1a** (81.7 mg, 0.5 mmol, 1.0 equiv), 1-methylimidazole-2-carboxaldehyde (55.1 mg, 0.5 mmol, 1.0 equiv), and additional BF<sub>3</sub>•MeCN (1.2 mL, 1.5 mmol, 3.0 equiv) for 16 h. The desired product (33.4 mg, 36%) was obtained by flash column chromatography (EtOAc:CH<sub>2</sub>Cl<sub>2</sub> = 1:1 to EtOAc:CH<sub>2</sub>Cl<sub>2</sub>:MeOH = 1:1:0.5) as yellowish oil.

**<sup>1</sup>H NMR** (400 MHz, CDCl<sub>3</sub>): δ [ppm] = 6.92 (d, *J* = 1.3 Hz, 1 H), 6.79 (d, *J* = 1.3 Hz, 1 H), 4.12 (dd, *J* = 10.8, 2.5 Hz, 1 H), 3.69 (s, 3 H), 3.44 (dtd, *J* = 13.6, 2.9, 0.9 Hz, 1 H), 3.26–2.98 (m, 2 H), 2.74 (ddd, *J* = 13.4, 11.9, 3.1 Hz, 1 H), 2.59 (dt, *J* = 13.7, 2.4 Hz, 1 H), 2.36 (dq, *J* = 13.5, 2.4 Hz, 1 H), 1.81 (br, 1 H); **<sup>13</sup>C NMR** (100 MHz, CDCl<sub>3</sub>): δ [ppm] = 148.5, 127.4, 121.3, 53.8, 48.0, 32.9, 31.2, 27.6; **HRMS** (ESI): calculated for [C<sub>8</sub>H<sub>14</sub>N<sub>3</sub>S]<sup>+</sup>: *m/z* = 184.0903, found: *m/z* = 184.0903; **IR** (ν/cm<sup>-1</sup>, neat): 3383, 2917, 1661, 1492, 1455, 1417, 1282, 1135, 1021, 932, 739.

### 3-(Thiazol-5-yl)thiomorpholine (6p) (Scheme 3)

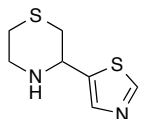

The photomediated synthesis of **6p** followed the general procedure with **1a** (81.7 mg, 0.5 mmol, 1.0 equiv), 1,3-thiazole-5-carbaldehyde (43.4 μL, 0.5 mmol, 1.0 equiv), and additional BF<sub>3</sub>•MeCN (1.2 mL, 1.5 mmol, 3.0 equiv) for 16 h. The desired product (66.9 mg, 72%) was obtained by flash column chromatography (EtOAc:CH<sub>2</sub>Cl<sub>2</sub> = 1:1 to EtOAc:CH<sub>2</sub>Cl<sub>2</sub>:MeOH = 1:1:0.2) as yellowish oil.

**<sup>1</sup>H NMR** (400 MHz, CDCl<sub>3</sub>): δ [ppm] = 8.65 (d, *J* = 0.7 Hz, 1 H), 7.78 – 7.64 (m, 1 H), 4.28 (dd, *J* = 10.2, 2.5 Hz, 1 H), 3.35 (dt, *J* = 12.4, 3.2 Hz, 1 H), 3.10 (ddd, *J* = 12.5, 11.4, 2.5 Hz, 1 H), 2.86–2.68 (m, 2 H), 2.57 (dt, *J* = 13.1, 2.2 Hz, 1 H), 2.38 (ddt, *J* = 13.3, 3.3, 2.2 Hz, 1 H), 1.97 (br, 1 H); **<sup>13</sup>C NMR** (100 MHz, CDCl<sub>3</sub>): δ [ppm] = 152.4, 142.1, 139.5, 55.2, 48.5, 35.4, 27.3; **HRMS** (ESI): calculated for [C<sub>7</sub>H<sub>11</sub>N<sub>2</sub>S<sub>2</sub>]<sup>+</sup>: *m/z* = 187.0358, found: *m/z* = 187.0360; **IR** (ν/cm<sup>-1</sup>, neat): 3405, 3281, 3077, 2909, 2818, 1665, 1448, 1405, 1308, 1294, 1244, 1107, 1018, 876, 802.

### 3-(Thiazol-4-yl)thiomorpholine (6q) (Scheme 3)

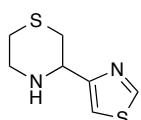

The photomediated synthesis of **6q** followed the general procedure with **1a** (81.7 mg, 0.5 mmol, 1.0 equiv), 4-thiazolecarboxaldehyde (56.6 mg, 0.5 mmol, 1.0 equiv), and additional BF<sub>3</sub>•MeCN (1.2 mL, 1.5 mmol, 3.0 equiv) for 16 h. The desired product (43.0 mg, 46%) was obtained by flash column chromatography (EtOAc:CH<sub>2</sub>Cl<sub>2</sub> = 1:1 to EtOAc:CH<sub>2</sub>Cl<sub>2</sub>:MeOH = 1:1:0.2) as yellowish oil.

**<sup>1</sup>H NMR** (400 MHz, CDCl<sub>3</sub>): δ [ppm] = 8.76 (d, *J* = 2.0 Hz, 1 H), 7.21 (dd, *J* = 2.0, 0.8 Hz, 1 H), 4.24 (ddd, *J* = 10.1, 2.7, 0.8 Hz, 1 H), 3.45 (dt, *J* = 12.6, 3.2 Hz, 1 H), 3.19 (ddd, *J* = 12.5, 11.5, 2.5 Hz, 1 H), 2.99–2.71 (m, 4 H), 2.45 (ddt, *J* = 13.3, 3.1, 2.2 Hz, 1 H), 2.22 (br, 1 H); **<sup>13</sup>C NMR** (100 MHz, CDCl<sub>3</sub>): δ [ppm] = 159.4, 153.1, 113.5, 58.0, 48.4, 32.9, 27.7; **HRMS** (ESI): calculated for [C<sub>7</sub>H<sub>11</sub>N<sub>2</sub>S<sub>2</sub>]<sup>+</sup>: *m/z* = 187.0358, found: *m/z* = 187.0361; **IR** (ν/cm<sup>-1</sup>, neat): 3415, 3082, 2919, 1666, 1443, 1415, 1309, 1289, 1147, 1035, 1018, 878, 827, 732.



**5-Methyl-3-(thiomorpholin-3-yl)isoxazole (6r) (Scheme 3)**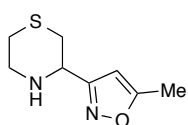

The photomediated synthesis of **6r** followed the general procedure with **1a** (81.7 mg, 0.5 mmol, 1.0 equiv), 5-methylisoxazole-3-carboxaldehyde (55.6 mg, 0.5 mmol, 1.0 equiv), and additional  $\text{BF}_3 \cdot \text{MeCN}$  (1.2 mL, 1.5 mmol, 3.0 equiv) for 16 h. The desired product (73.7 mg, 80%) was obtained by flash column chromatography ( $\text{EtOAc}:\text{CH}_2\text{Cl}_2 = 1:1$  to  $\text{EtOAc}:\text{CH}_2\text{Cl}_2:\text{MeOH} = 1:1:0.2$ ) as yellowish oil.

$^1\text{H NMR}$  (400 MHz,  $\text{CDCl}_3$ ):  $\delta$  [ppm] = 5.92 (s, 1 H), 4.08 (dt,  $J = 10.4, 2.1$  Hz, 1 H), 3.34 (dt,  $J = 12.5, 3.1$  Hz, 1 H), 3.14–3.01 (m, 1 H), 2.77 (tdd,  $J = 14.4, 10.8, 2.3$  Hz, 2 H), 2.58 (dq,  $J = 13.2, 2.0$  Hz, 1 H), 2.37 (ddd,  $J = 11.4, 3.9, 1.9$  Hz, 1 H), 2.34 (s, 2 H), 2.01 (s, 1 H);  $^{13}\text{C NMR}$  (100 MHz,  $\text{CDCl}_3$ ):  $\delta$  [ppm] = 169.6, 165.5, 99.6, 54.2, 47.8, 32.1, 27.4, 12.3; **HRMS** (ESI): calculated for  $[\text{C}_8\text{H}_{13}\text{N}_2\text{OS}]^+$ :  $m/z = 185.0743$ , found:  $m/z = 185.0743$ ; **IR** ( $\text{v}/\text{cm}^{-1}$ , neat): 3306, 3128, 2912, 2835, 1673, 1604, 1479, 1448, 1419, 1313, 1257, 1121, 1017, 898, 807, 748.

**3-Phenyl-5-(thiomorpholin-3-yl)isoxazole (6s) (Scheme 3)**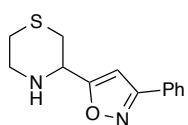

The photomediated synthesis of **6s** followed the general procedure with **5.1** (81.7 mg, 0.5 mmol, 1.0 equiv), 3-phenyl-1,2-oxazole-5-carbaldehyde (86.6 mg, 0.5 mmol, 1.0 equiv), and additional  $\text{BF}_3 \cdot \text{MeCN}$  (1.2 mL, 1.5 mmol, 3.0 equiv) for 16 h. The desired product (101.9 mg, 83%) was obtained by flash column chromatography ( $\text{EtOAc}:\text{CH}_2\text{Cl}_2 = 1:1$  to  $\text{EtOAc}:\text{CH}_2\text{Cl}_2:\text{MeOH} = 1:1:0.2$ ) as pale yellow solids.

**m.p.**: 117–118 °C;  $^1\text{H NMR}$  (400 MHz,  $\text{CDCl}_3$ ):  $\delta$  [ppm] = 7.83–7.67 (m, 1 H), 7.49–7.36 (m, 1 H), 6.48 (d,  $J = 0.8$  Hz, 1 H), 4.25 (ddd,  $J = 9.2, 3.3, 0.7$  Hz, 1 H), 3.39 (dt,  $J = 12.6, 3.4$  Hz, 1 H), 3.12 (ddd,  $J = 12.6, 10.8, 2.5$  Hz, 1 H), 2.93–2.72 (m, 2 H), 2.46 (dddd,  $J = 13.3, 4.0, 2.5, 1.5$  Hz, 1 H), 1.99 (s, 1 H);  $^{13}\text{C NMR}$  (100 MHz,  $\text{CDCl}_3$ ):  $\delta$  [ppm] = 173.7, 162.3, 130.1, 129.0, 128.9, 126.8, 98.6, 54.2, 47.5, 31.6, 27.6; **HRMS** (ESI): calculated for  $[\text{C}_{13}\text{H}_{15}\text{N}_2\text{OS}]^+$ :  $m/z = 247.0900$ , found:  $m/z = 247.0901$ ; **IR** ( $\text{v}/\text{cm}^{-1}$ , neat): 3241, 3116, 2912, 2818, 1597, 1577, 1468, 1441, 1405, 1312, 1010, 967, 950, 915, 826, 769, 692.

**3-(Quinolin-8-yl)thiomorpholine (6t) (Scheme 3)**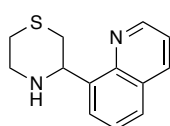

The photomediated synthesis of **6t** followed the general procedure with **1a** (81.7 mg, 0.5 mmol, 1.0 equiv), quinoline-8-carboxaldehyde (78.6 mg, 1.0 equiv), and additional  $\text{BF}_3 \cdot \text{MeCN}$  (0.8 mL, 1.0 mmol, 2.0 equiv). The desired product (72.6 mg, 63%) was obtained by flash column chromatography ( $\text{EtOAc}:\text{CH}_2\text{Cl}_2 = 1:1$  to  $\text{EtOAc}:\text{CH}_2\text{Cl}_2:\text{MeOH} = 1:1:0.2$ ) as brown oil.

$^1\text{H NMR}$  (400 MHz,  $\text{CDCl}_3$ ):  $\delta$  [ppm] = 8.87 (dd,  $J = 4.2, 1.8$  Hz, 1 H), 8.09 (dd,  $J = 8.3, 1.8$  Hz, 1 H), 7.73 (dd,  $J = 7.1, 1.5$  Hz, 1 H), 7.68 (dd,  $J = 8.1, 1.5$  Hz, 1 H), 7.50–7.45 (m, 1 H), 7.38–7.34 (m, 1 H), 5.00 (dd,  $J = 10.5, 2.3$  Hz, 1 H), 3.49–3.43 (m, 1 H), 3.25–3.18 (m, 1 H), 3.11–3.04 (m, 2 H), 2.97–2.89 (m, 1 H), 2.74–2.68 (m, 1 H), 2.45–2.41 (m, 1 H);  $^{13}\text{C NMR}$  (100 MHz,  $\text{CDCl}_3$ ):  $\delta$  [ppm] = 149.4, 145.7, 141.4, 136.4, 128.4, 127.4, 126.7, 126.4, 121.1, 58.2, 48.9, 33.3, 27.5; **HRMS** (ESI): calculated for  $[\text{C}_{13}\text{H}_{15}\text{N}_2\text{S}]^+$ :  $m/z = 231.0950$ , found:  $m/z = 231.0954$ ; **IR** ( $\text{v}/\text{cm}^{-1}$ , neat): 3300, 2907, 1596, 1576, 1498, 1465, 1447, 1365, 1318, 1309, 1152, 1119, 1030, 973, 884, 798.

**3-(Pyrazolo[1,5-*a*]pyridin-7-yl)thiomorpholine (6u) (Scheme 3)**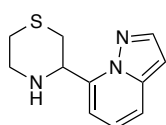

The photomediated synthesis of **6u** followed the general procedure with **1a** (81.7 mg, 0.5 mmol, 1.0 equiv), pyrazolo[1,5-*a*]pyridine-7-carbaldehyde (73.1 mg, 1.0 equiv), and additional  $\text{BF}_3 \cdot \text{MeCN}$  (1.2 mL, 1.5 mmol, 3.0 equiv). The desired product (82.4 mg, 75%) was obtained by flash column chromatography ( $\text{EtOAc}:\text{CH}_2\text{Cl}_2 = 1:1$  to  $\text{EtOAc}:\text{CH}_2\text{Cl}_2:\text{MeOH} = 1:1:0.2$ ) as brown oil.

**<sup>1</sup>H NMR** (400 MHz, CDCl<sub>3</sub>): δ [ppm] = 7.95 (d, *J* = 2.2 Hz, 1 H), 7.45 (dt, *J* = 8.8, 1.8 Hz, 1 H), 7.07 (ddt, *J* = 8.8, 6.8, 1.8 Hz, 1 H), 6.81 (dd, *J* = 7.1, 2.3 Hz, 1 H), 6.51 (q, *J* = 2.1 Hz, 1 H), 4.77 (dt, *J* = 9.2, 2.9 Hz, 1 H), 3.44 (dt, *J* = 12.4, 3.3 Hz, 1 H), 3.24 (tq, *J* = 12.2, 2.3 Hz, 1 H), 3.09–2.80 (m, 3 H), 2.64 (br, 1 H), 2.48 (ddt, *J* = 14.9, 3.7, 1.9 Hz, 1 H); **<sup>13</sup>C NMR** (100 MHz, CDCl<sub>3</sub>): δ [ppm] = 142.0, 141.2, 140.6, 123.2, 117.0, 108.4, 97.1, 57.0, 48.5, 30.7, 27.8; **HRMS** (ESI): calculated for [C<sub>11</sub>H<sub>14</sub>N<sub>3</sub>S]<sup>+</sup>: *m/z* = 220.0903, found: *m/z* = 220.0904; **IR** (ν/cm<sup>-1</sup>, neat): 3411, 2917, 2712, 2634, 1635, 1547, 1524, 1455, 1417, 1310, 1215, 1181, 1152, 1039, 916, 796, 780, 730.

### *trans*-3-(Pyridin-2-yl)-2-(trimethylsilyl)thiomorpholine (7d) (Scheme 3)

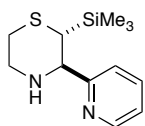

The photomediated synthesis of **7d** followed the general procedure with **1b** (117.8 mg, 0.5 mmol, 1.0 equiv), 2-pyridinecarboxaldehyde (47.1 μL, 0.5 mmol, 1.0 equiv), and additional BF<sub>3</sub>•MeCN (0.8 mL, 1.0 mmol, 2.0 equiv) for 16 h. The desired product (39.3 mg, 31%) was obtained by flash column chromatography (EtOAc:CH<sub>2</sub>Cl<sub>2</sub> = 1:1 to EtOAc:CH<sub>2</sub>Cl<sub>2</sub>:MeOH = 1:1:0.5) as brown oil.

**<sup>1</sup>H NMR** (400 MHz, CDCl<sub>3</sub>): δ [ppm] = 8.54 (ddd, *J* = 4.8, 1.8, 1.1 Hz, 1 H), 7.64 (td, *J* = 7.7, 1.8 Hz, 1 H), 7.29 (dt, *J* = 7.7, 1.1 Hz, 1 H), 7.19 (ddd, *J* = 7.7, 4.8, 1.1 Hz, 1 H), 4.01 (d, *J* = 10.3 Hz, 1 H), 3.44 (dt, *J* = 13.1, 3.0 Hz, 1 H), 3.15 (ddd, *J* = 13.1, 12.1, 2.6 Hz, 1 H), 2.86 (ddd, *J* = 13.1, 12.1, 3.0 Hz, 1 H), 2.72 (d, *J* = 10.3 Hz, 1 H), 2.39 (dt, *J* = 13.1, 2.6 Hz, 1 H), 2.27 (br, 1 H), -0.28 (s, 9 H); **<sup>13</sup>C NMR** (100 MHz, CDCl<sub>3</sub>): δ [ppm] = 149.7, 137.0, 123.2, 123.0, 65.4, 47.9, 32.9, 28.5, -2.5; **HRMS** (ESI): calculated for [C<sub>12</sub>H<sub>21</sub>N<sub>2</sub>SSi]<sup>+</sup>: *m/z* = 253.1189, found: *m/z* = 253.1189; **IR** (ν/cm<sup>-1</sup>, neat): 3288, 2918, 2849, 1589, 1472, 1434, 1249, 1154, 1121, 1109, 996, 936, 851, 838.

### 3-(Quinolin-3-yl)-1,4-thiazepane (8d) (Scheme 3)

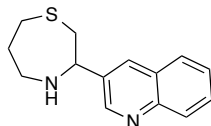

The photomediated synthesis of **8d** followed the general procedure with **1c** (88.7 mg, 0.5 mmol, 1.0 equiv), 3-quinolinecarboxaldehyde (78.6 mg, 1.0 equiv), and additional BF<sub>3</sub>•MeCN (0.8 mL, 1.0 mmol, 2.0 equiv) for 48 h. The desired product (83.2 mg, 68%) was obtained by flash column chromatography (EtOAc:CH<sub>2</sub>Cl<sub>2</sub> = 1:1 to EtOAc:CH<sub>2</sub>Cl<sub>2</sub>:MeOH = 1:1:0.2) as brown oil.

**<sup>1</sup>H NMR** (400 MHz, CDCl<sub>3</sub>): δ [ppm] = 8.87 (d, *J* = 2.2 Hz, 1 H), 8.10 (d, *J* = 2.1 Hz, 1 H), 8.05 (dq, *J* = 8.5, 0.9 Hz, 1 H), 7.76 (dd, *J* = 8.2, 1.4 Hz, 1 H), 7.65 (ddd, *J* = 8.4, 6.9, 1.5 Hz, 1 H), 7.49 (ddd, *J* = 8.1, 6.9, 1.2 Hz, 1 H), 4.16 (ddd, *J* = 8.9, 3.9, 0.7 Hz, 1 H), 3.23–3.07 (m, 2 H), 3.01 (ddd, *J* = 14.5, 4.0, 1.0 Hz, 1 H), 2.95–2.73 (m, 3 H), 2.06 (dtd, *J* = 19.7, 10.3, 9.2, 4.3 Hz, 2 H), 1.96–1.81 (m, 1 H); **<sup>13</sup>C NMR** (100 MHz, CDCl<sub>3</sub>): δ [ppm] = 150.4, 147.7, 137.1, 132.9, 129.3, 129.2, 128.0, 127.8, 126.8, 64.5, 46.9, 43.1, 33.5, 33.0; **HRMS** (ESI): calculated for [C<sub>14</sub>H<sub>17</sub>N<sub>2</sub>S]<sup>+</sup>: *m/z* = 245.1107, found: *m/z* = 245.1107; **IR** (ν/cm<sup>-1</sup>, neat): 3313, 3053, 2921, 2846, 1619, 1572, 1495, 1419, 1326, 1121, 1016, 914, 788, 754, 734.

### 3-(2-Methyl-2*H*-indazol-3-yl)-1,4-thiazepane (8e) (Scheme 3)

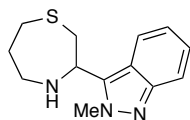

The photomediated synthesis of **8e** followed the general procedure with **1c** (88.7 mg, 0.5 mmol, 1.0 equiv), 2-methyl-2*H*-indazole-3-carbaldehyde (80.1 mg, 1.0 equiv), and additional BF<sub>3</sub>•MeCN (1.2 mL, 1.5 mmol, 3.0 equiv). The desired product (38.8 mg, 31%) was obtained by flash column chromatography (EtOAc:CH<sub>2</sub>Cl<sub>2</sub> = 1:1 to EtOAc:CH<sub>2</sub>Cl<sub>2</sub>:MeOH = 1:1:0.1) as yellowish solids.

**m.p.**: 139–140 °C; **<sup>1</sup>H NMR** (400 MHz, CDCl<sub>3</sub>): δ [ppm] = 7.83 (dt, *J* = 8.5, 1.1 Hz, 1 H), 7.61 (dt, *J* = 8.7, 1.0 Hz, 1 H), 7.24 (ddd, *J* = 8.8, 6.6, 1.1 Hz, 1 H), 7.02 (ddd, *J* = 8.5, 6.6, 0.9 Hz, 1 H), 4.48 (dd, *J* = 9.6, 3.5 Hz, 1 H), 4.21 (s, 3 H), 3.30 (ddd, *J* = 14.3, 5.6, 3.1 Hz, 1 H), 3.22–2.97 (m, 3 H), 2.90 (ddtd, *J* = 14.4, 11.1, 3.8, 1.2 Hz, 2 H), 2.12 (ddtd, *J* = 16.3, 11.0, 5.6, 4.0 Hz, 1 H), 2.02–1.84 (m, 2 H); **<sup>13</sup>C NMR** (100 MHz, CDCl<sub>3</sub>): δ [ppm] = 147.9, 136.3, 126.0, 121.2, 120.6, 119.8, 117.2, 61.1, 47.9, 41.0, 38.9, 32.9, 32.8; **HRMS**

(ESI): calculated for  $[C_{13}H_{18}N_3S]^+$ :  $m/z = 248.1216$ , found:  $m/z = 248.1217$ ; **IR** ( $\nu/cm^{-1}$ , neat): 3299, 3056, 2923, 2942, 1495, 1436, 1372, 1319, 1282, 1131, 1046, 999, 975, 889, 748, 741.

### 3-(1-Methyl-1*H*-benzo[*d*]imidazol-2-yl)-1,4-thiazepane (**8f**) (Scheme 3)

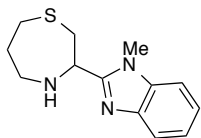

The photomediated synthesis of **8f** followed the general procedure with **1c** (88.7 mg, 0.5 mmol, 1.0 equiv), 1-methyl-1*H*-benzimidazole-2-carbaldehyde (80.1 mg, 1.0 equiv), and additional  $BF_3 \cdot MeCN$  (1.2 mL, 1.5 mmol, 3.0 equiv). The desired product (61.7 mg, 50%) was obtained by flash column chromatography (EtOAc:CH<sub>2</sub>Cl<sub>2</sub> = 1:1 to EtOAc:CH<sub>2</sub>Cl<sub>2</sub>:MeOH = 1:1:0.2) as brown oil.

**<sup>1</sup>H NMR** (400 MHz, CDCl<sub>3</sub>):  $\delta$  [ppm] = 7.87–7.70 (m, 1 H), 7.47–7.11 (m, 3 H), 4.27 (dd,  $J = 9.8, 4.8$  Hz, 1 H), 3.84 (s, 3 H), 3.54 (dd,  $J = 15.0, 9.8$  Hz, 1 H), 3.21 (ddd,  $J = 15.0, 4.8, 1.0$  Hz, 1 H), 3.09–2.90 (m, 2 H), 2.89–2.76 (m, 2 H), 2.21 (br, 1 H), 2.11 (ddq,  $J = 15.1, 6.9, 4.2$  Hz, 1 H), 1.84 (dtdd,  $J = 13.1, 6.0, 4.8, 3.1$  Hz, 1 H); **<sup>13</sup>C NMR** (100 MHz, CDCl<sub>3</sub>):  $\delta$  [ppm] = 155.0, 142.1, 136.1, 122.7, 122.0, 119.7, 109.2, 56.8, 44.7, 39.4, 34.8, 33.8, 30.1; **HRMS** (ESI): calculated for  $[C_{13}H_{18}N_3S]^+$ :  $m/z = 248.1216$ , found:  $m/z = 248.1217$ ; **IR** ( $\nu/cm^{-1}$ , neat): 3338, 3054, 2916, 1670, 1614, 1470, 1438, 1283, 1236, 1123, 1007, 929, 909, 767, 742.

### 3.6 Preliminary substrate scope of substituted morpholines and thiomorpholines with organophotocatalyst 2,4,6-triphenylpyrylium tetrafluoroborate (TPP•BF<sub>4</sub>) (Scheme 4)

#### Methyl 4-(thiomorpholin-3-yl)benzoate (6d) (Scheme 4)

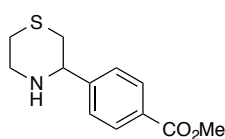

A mixture of the SLAP reagent **1a** (81.7 mg, 0.5 mmol, 1.0 equiv), methyl 4-formylbenzoate (82.1 mg, 0.5 mmol, 1.0 equiv), and MS 4A (100.0 mg) in CH<sub>2</sub>Cl<sub>2</sub> (1.0 mL, 0.5 M) under N<sub>2</sub> was stirred 4 h at room temperature. The reaction was filtered through Celite and washed with CH<sub>2</sub>Cl<sub>2</sub>. The filtrate was condensed under *vacuo* and the residue (imine product) was re-dissolved in MeCN (5.0 mL, 0.1 M) in a vial (7 mL), followed by the addition of Bi(OTf)<sub>3</sub> (656.2 mg, 1.0 mmol, 2.0 equiv) and photocatalyst TPP•BF<sub>4</sub> (9.9 mg, 25.0 μmol, 0.05 equiv). The reaction was stirred for 24 h at room temperature under the exposure of blue LEDs with a cooling fan to maintain the temperature. **WORKUP:** NH<sub>3(aq)</sub> (ca. 1.0 mL, ca. 12 M) and sat. Na<sub>2</sub>CO<sub>3(aq)</sub> (ca. 0.5 mL) were added, and the reaction was stirred for another 5 min to allow the formation of salt precipitates. After the mixture was filtered through Celite, the filtrate was evaporated under *vacuo* and the residue was extracted with CH<sub>2</sub>Cl<sub>2</sub>/water. The organic extracts were combined, dried over Na<sub>2</sub>SO<sub>4</sub>, filtered, and condensed under *vacuo*. The desired product (85.4 mg, 72%) was obtained by flash column chromatography (30–70% EtOAc in hexanes) with spectral characteristics identical to those previously mentioned.

*This preliminary condition was also applied to the following synthesis of morpholine substrate 12a and 12b. Please note this reaction system was not optimized.*

#### 3-(4-Fluorophenyl)morpholine (12a)

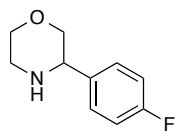

The photomediated synthesis of **12a** using Bi(OTf)<sub>3</sub> and TPP•BF<sub>4</sub> followed the previous procedure with SLAP reagent **11** (73.6 mg, 0.5 mmol, 1.0 equiv) and 4-fluorobenzaldehyde (54.0 mL, 0.5 mmol, 1.0 equiv) for 24 h. The desired product (56.6 mg, 62%) was obtained by flash column chromatography (30% EtOAc in hexanes to EtOAc) as yellowish oil.

<sup>1</sup>H NMR (400 MHz, CDCl<sub>3</sub>): δ [ppm] = 7.37–7.32 (m, 2 H), 7.03–6.97 (m, 2 H), 3.90–3.83 (m, 2 H), 3.77 (dd, *J* = 11.0, 3.2 Hz, 1 H), 3.62 (td, *J* = 11.6, 2.7 Hz, 1 H), 3.33 (dd, *J* = 11.0, 10.1 Hz, 1 H), 3.11 (td, *J* = 11.6, 3.3 Hz, 1 H), 2.99–2.95 (m, 1 H), 1.90 (br, 1 H); <sup>13</sup>C NMR (100 MHz, CDCl<sub>3</sub>): δ [ppm] = 162.4 (d, *J* = 245.7 Hz), 136.5 (d, *J* = 3.1 Hz), 128.8 (d, *J* = 8.0 Hz), 115.4 (d, *J* = 21.3 Hz), 73.8 (d, *J* = 1.4 Hz), 67.3, 59.9, 46.7; <sup>19</sup>F NMR (377 MHz, CDCl<sub>3</sub>): δ [ppm] = –114.7; HRMS (ESI): calculated for [C<sub>10</sub>H<sub>13</sub>FNO]<sup>+</sup>: *m/z* = 182.0976, found: *m/z* = 182.0978; IR (ν/cm<sup>-1</sup>, neat): 2957, 2850, 1604, 1509, 1450, 1333, 1296, 1223, 1157, 1140, 1106, 930, 834.

#### 3-(Morpholin-3-yl)benzonitrile (12b)

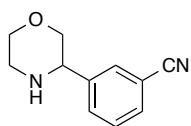

The photomediated synthesis of **12b** using Bi(OTf)<sub>3</sub> and TPP•BF<sub>4</sub> followed the previous procedure with SLAP reagent **11** (73.6 mg, 0.5 mmol, 1.0 equiv) and 3-cyanobenzaldehyde (65.6 mg, 0.5 mmol, 1.0 equiv) for 24 h. The desired product (61.7 mg, 66%) was obtained by flash column chromatography (30% EtOAc in hexanes to EtOAc) as yellowish oil.

<sup>1</sup>H NMR (400 MHz, CDCl<sub>3</sub>): δ [ppm] = 7.72 (t, *J* = 1.6 Hz, 1 H), 7.61 (dt, *J* = 7.7, 1.6 Hz, 1 H), 7.55 (dt, *J* = 7.7, 1.4 Hz, 1 H), 7.42 (t, *J* = 7.7 Hz, 1 H), 3.95 (dd, *J* = 10.0, 3.2 Hz, 1 H), 3.88–3.84 (m, 1 H), 3.78 (apparent dd, *J* = 11.1, 3.2 Hz, 1 H), 3.62 (ddd, *J* = 11.5, 11.3, 2.6 Hz, 1 H), 3.31 (apparent dd, *J* = 11.0, 10.0 Hz, 1 H), 3.11 (td, *J* = 11.5, 3.2 Hz, 1H), 2.99 (ddd, *J* = 11.5, 2.6, 1.6 Hz, 1 H), 1.90 (br, 1 H); <sup>13</sup>C NMR (100 MHz, CDCl<sub>3</sub>): δ [ppm] = 142.3, 131.8, 131.5, 130.9, 129.4, 118.8, 112.7, 73.4, 67.3, 59.8, 46.3; HRMS (ESI): calculated for [C<sub>11</sub>H<sub>13</sub>N<sub>2</sub>O]<sup>+</sup>: *m/z* = 189.1022, found: *m/z* = 189.1024; IR (ν/cm<sup>-1</sup>, neat): 3320, 2957, 2850, 2229, 1481, 1451, 1432, 1334, 1293, 1106, 928, 844, 743, 693.

## 3.7 Photocyclization of alkene mimics (Scheme 5)

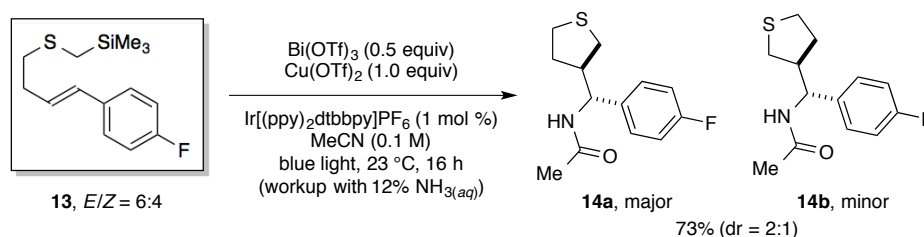3-(((Trimethylsilyl)methyl)thio)propanal (**S8**)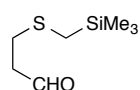

To a solution of prop-2-enal (0.74 mL, 11.00 mmol, 1.10 equiv) and Et<sub>3</sub>N (0.14 mL, 1.00 mmol, 0.10 equiv) in CH<sub>2</sub>Cl<sub>2</sub> (10 mL, 1.00 M), (trimethylsilyl)methanethiol (1.42 mL, 10.00 mmol, 1.00 equiv) was added slowly. The mixture was stirred at room temperature overnight, followed by washing with 5% HCl<sub>(aq)</sub> (3×5 mL), water, and brine. The organic layer was dried over Na<sub>2</sub>SO<sub>4</sub>, filtered, and evaporated under *vacuo* to afford the desired product (1.72 g, 98%) as colorless oil without further purification.

<sup>1</sup>H NMR (400 MHz, CDCl<sub>3</sub>): δ [ppm] = 9.74 (t, *J* = 1.5 Hz, 1 H), 2.79–2.68 (m, 4 H), 1.76 (s, 2 H), 0.05 (s, 9 H); <sup>13</sup>C NMR (100 MHz, CDCl<sub>3</sub>): δ [ppm] = 200.9, 43.2, 28.5, 18.6, –1.7; HRMS (EI): calculated for [C<sub>7</sub>H<sub>16</sub>OSSi]<sup>+</sup>: *m/z* = 176.0691, found: *m/z* = 176.0690; IR (ν/cm<sup>-1</sup>, neat): 2955, 2896, 2825, 2724, 1726, 1391, 1362, 1249, 1127, 1055, 846, 697.

(((4-(4-Fluorophenyl)but-3-en-1-yl)thio)methyl)trimethylsilane, mixture of *E,Z*-isomers (**13**)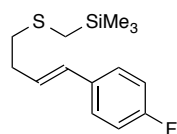

To an ice-cooled solution of (4-fluorobenzyl)triphenylphosphonium bromide (2.2 g, 5.5 mmol, 1.1 equiv) in anhydrous THF (10 mL), *t*BuOK (1.0 M solution in THF, 5.5 mL, 5.5 mmol, 1.1 equiv) was added dropwise. The mixture was warmed to room temperature, stirred for 1 h, and cooled again to 0 °C. A solution of **S8** (881.8 mg, 5.0 mmol, 1.0 equiv) in THF (10 mL) was added dropwise before the reaction was warmed to room temperature. The reaction was stirred for another 5 h and quenched with water. The solvent was removed under *vacuo* and the residue was extracted with EtOAc (3×10 mL). The organic extracts were combined, washed with brine, dried over Na<sub>2</sub>SO<sub>4</sub>, filtered, and evaporated under *vacuo*. The mixture of pure alkene products (*E:Z* = 6:4) was obtained by flash column chromatography as colorless oil (1.1 g, 81%).

The ratio of *E*-isomer:*Z*-isomer was 6:4 as determined by <sup>1</sup>H NMR. <sup>1</sup>H NMR (400 MHz, CDCl<sub>3</sub>): δ [ppm] = 7.60–7.56 (m, 1.2 H), 7.54–7.50 (m, 0.8 H), 7.32–7.24 (m, 2 H), 6.74–6.66 (m, 1 H), 6.43 (dt, *J* = 15.8, 6.8 Hz, 0.6 H), 6.00–5.94 (m, 0.4 H), 2.95–2.86 (m, 2.4 H), 2.81–2.75 (m, 1.6 H), 2.10 (s, 1.2 H), 2.03 (s, 0.8 H), 0.39 (s, 5.4 H), 0.37 (s, 3.6 H); <sup>13</sup>C NMR (100 MHz, CDCl<sub>3</sub>, peaks from the major isomer were marked with asterisks): δ [ppm] = 162.1\* (d, *J* = 246.0 Hz), 161.7 (d, *J* = 246.1 Hz), 133.8\* (d, *J* = 3.3 Hz), 133.5 (d, *J* = 3.4 Hz), 130.7 (d, *J* = 1.4 Hz), 130.4 (d, *J* = 7.8 Hz), 129.9, 129.0, 128.6\* (d, *J* = 2.3 Hz), 127.6\* (d, *J* = 7.9 Hz), 115.4\* (d, *J* = 21.5 Hz), 115.2 (d, *J* = 21.3 Hz), 36.1, 36.0\*, 32.8\*, 28.1, 18.6\*, 18.4, –1.56\*, –1.58; <sup>19</sup>F NMR (377 MHz, CDCl<sub>3</sub>): δ [ppm] = –115.3; HRMS (EI): calculated for [C<sub>14</sub>H<sub>21</sub>FSSi]<sup>+</sup>: *m/z* = 268.1117, found: *m/z* = 268.1116; IR (ν/cm<sup>-1</sup>, neat): 2954, 2909, 1729, 1602, 1508, 1249, 1227, 1157, 967, 846, 697.

*N*-((4-Fluorophenyl)(tetrahydrothiophen-3-yl)methyl)acetamide, diastereomers (**14**)

To a solution of alkene **13** (134.2 mg, 0.5 mmol, 1.0 equiv) in MeCN (5.0 mL, 0.1 M), Cu(OTf)<sub>2</sub> (180.8 mg, 0.5 mmol, 1.0 equiv), Bi(OTf)<sub>3</sub> (160.4 mg, 0.25 mmol, 0.5 equiv), and Ir[(ppy)<sub>2</sub>dtbbpy]PF<sub>6</sub> (4.6 mg, 5.0 μmol, 0.01 equiv) were added. The reaction was stirred for 16 h at room temperature under the exposure of blue LEDs (30 W) with a cooling fan to maintain the temperature. NH<sub>3(aq)</sub> (1 mL, ca. 12 M) was added and the reaction was stirred for another 10 min. After the solvents were removed under *vacuo*, the residue was re-dissolved in CH<sub>2</sub>Cl<sub>2</sub>/NH<sub>3(aq)</sub> and filtered. The filtrate was extracted with CH<sub>2</sub>Cl<sub>2</sub> and the combined organic

layers were washed with  $\text{NH}_3(\text{aq})$ . The final organic extracts were dried over  $\text{Na}_2\text{SO}_4$ , filtered, and condensed under *vacuo* (**14a:14b** = 2:1, determined by  $^1\text{H}$  NMR measurement of unpurified mixtures). The residue was purified by flash column chromatography to obtain white solids, pure **14a** (50.5 mg), pure **14b** (25.9 mg), and mixture of **14a** and **14b** (16.2 mg) (total 92.6 mg, 73%).

**14a.** (major) **m.p.:** 155–156 °C;  $^1\text{H}$  NMR (400 MHz,  $\text{CDCl}_3$ ):  $\delta$  [ppm] = 7.31–7.19 (m, 2 H), 7.11–6.94 (m, 2 H), 6.02 (d,  $J = 9.0$  Hz, 1 H), 4.96 (t,  $J = 9.0$  Hz, 1 H), 2.96 (ddd,  $J = 11.1, 7.3, 4.2$  Hz, 1 H), 2.90–2.82 (m, 1 H), 2.59–2.49 (m, 2 H), 2.45–2.36 (m, 1 H), 2.24–2.13 (m, 1 H), 1.96 (s, 3 H), 1.92–1.83 (m, 1 H);  $^{13}\text{C}$  NMR (100 MHz,  $\text{CDCl}_3$ ):  $\delta$  [ppm] = 169.3, 162.2 (d,  $J = 246.5$  Hz), 137.3 (d,  $J = 3.3$  Hz), 128.6 (d,  $J = 8.0$  Hz), 115.8 (d,  $J = 21.5$  Hz), 55.1, 50.1, 34.3, 34.1, 30.5, 23.5;  $^{19}\text{F}$  NMR (377 MHz,  $\text{CDCl}_3$ ):  $\delta$  [ppm] = -114.3; **HRMS** (EI): calculated for  $[\text{C}_{13}\text{H}_{17}\text{FNOS}]^+$ :  $m/z = 254.1009$ , found:  $m/z = 254.1006$ ; **IR** ( $\nu/\text{cm}^{-1}$ , neat): 3276, 3067, 2931, 2859, 1722, 1651, 1549, 1510, 1373, 1225, 1160, 1015, 835.

**14b.** (minor) **m.p.:** 139–140 °C;  $^1\text{H}$  NMR (400 MHz,  $\text{CDCl}_3$ ):  $\delta$  [ppm] = 7.24 (ddd,  $J = 8.7, 4.5, 1.9$  Hz, 2 H), 7.09–6.96 (m, 2 H), 6.16 (d,  $J = 8.6$  Hz, 1 H), 4.95 (t,  $J = 9.0$  Hz, 1 H), 2.93 (dd,  $J = 10.7, 6.5$  Hz, 1 H), 2.89–2.78 (m, 2 H), 2.74 (dd,  $J = 10.8, 8.6$  Hz, 1 H), 2.63–2.46 (m, 1 H), 1.97 (s, 3 H), 1.85 (dtd,  $J = 12.1, 5.9, 3.7$  Hz, 1 H), 1.58 (dtd,  $J = 12.7, 9.6, 7.7$  Hz, 1 H);  $^{13}\text{C}$  NMR (100 MHz,  $\text{CDCl}_3$ ):  $\delta$  [ppm] = 169.4, 162.2 (d,  $J = 246.3$  Hz), 137.8 (d,  $J = 3.3$  Hz), 128.4 (d,  $J = 8.1$  Hz), 115.8 (d,  $J = 21.4$  Hz), 56.0, 50.3, 34.6, 34.2, 30.7, 23.6;  $^{19}\text{F}$  NMR (377 MHz,  $\text{CDCl}_3$ ):  $\delta$  [ppm] = -114.6; **HRMS** (EI): calculated for  $[\text{C}_{13}\text{H}_{17}\text{FNOS}]^+$ :  $m/z = 254.1009$ , found:  $m/z = 254.1010$ ; **IR** ( $\nu/\text{cm}^{-1}$ , neat): 3277, 3067, 2931, 2860, 1735, 1651, 1549, 1510, 1373, 1225, 1160, 1014, 838.

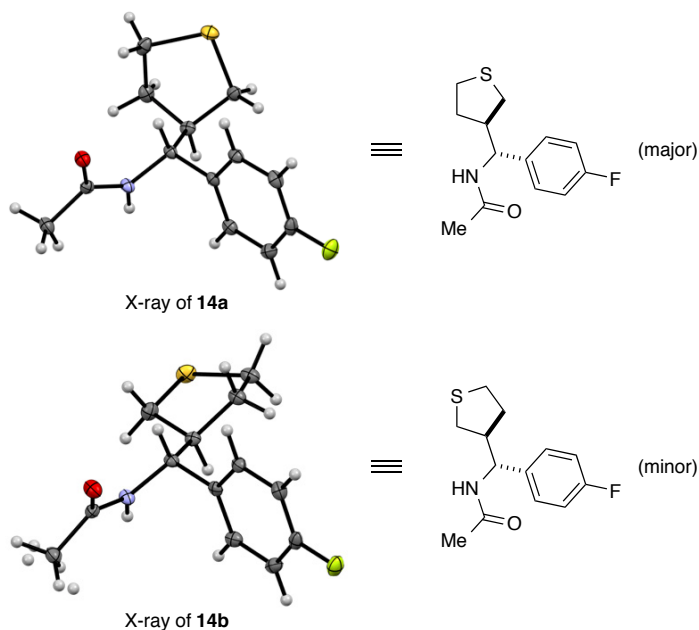

***N*-(Phenyl(3,4,6,10b-tetrahydro-1*H*-[1,4]thiazino[3,4-*a*]isoindol-6-yl)methyl)acetamide, mixture of isomers (**16**) (Scheme 5b)**

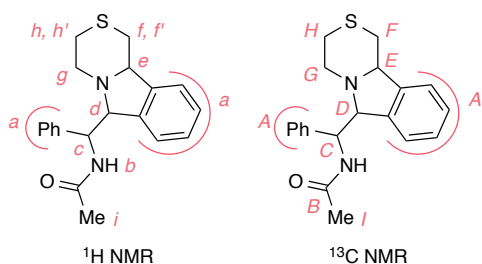

The photomediated cascade cyclization from imine **15** followed the general procedure (section 3.2) with **1a** (81.7 mg, 0.5 mmol, 1.0 equiv) and (*E*)-2-styrylbenzaldehyde<sup>15</sup> (104.1 mg, 0.5 mmol, 1.0 equiv) for 16 h. The desired product (mixture of isomers, 79.1 mg, 49%) was obtained by flash column chromatography.

$^1\text{H}$  NMR (400 MHz,  $\text{CDCl}_3$ ):  $\delta$  [ppm] = 7.47–7.18 (m, 8 H, *a*), 7.15 (tdd,  $J = 4.2, 3.2, 0.9$  Hz, 1 H, *a*), 6.40 (dd,  $J = 37.7, 7.8$  Hz, 1 H, *b*), 5.59 (dd,  $J = 7.8, 1.7$  Hz, 1 H, *c*), 4.43 (t,  $J = 2.2$  Hz, 1 H,

*d*), 3.88 (dd,  $J = 10.4, 2.5$  Hz, 1 H, *e*), 3.03 (dt,  $J = 12.5, 1.8$  Hz, 1 H, *f*), 2.96–2.70 (m, 2 H, *f'* & *h*), 2.55–2.39 (m, 2 H, *g*), 2.23 (dq,  $J = 12.4, 2.1$  Hz, 1 H, *h'*), 1.83 (s, 3 H, *i*);  $^{13}\text{C}$  NMR (100 MHz,  $\text{CDCl}_3$ , peaks from the major isomer were marked with asterisks):  $\delta$  [ppm] = 170.8, 169.9\* (**B**), 143.1, 140.8\* (**A**), 140.5\* (**A**), 138.9\* (**A**), 137.0, 129.2, 129.1, 128.8\* (**A**), 128.7, 128.3, 128.2\* (**A**), 127.9\* (**A**), 127.9, 127.7, 127.4, 127.3, 127.2\* (**A**), 126.5, 125.8, 125.7\* (**A**), 123.5, 122.2\* (**A**), 121.4, 121.1, 120.6\* (**A**), 120.4, 71.5\* (**D**), 70.3, 68.8\* (**E**), 66.9, 53.2\* (**C**), 52.7\* (**G**), 51.8, 50.1, 31.9\* (**F**), 28.7, 28.4\* (**H**), 23.4, 23.2\* (**I**); HRMS (EI): calculated for  $[\text{C}_{20}\text{H}_{23}\text{N}_2\text{OS}]^+$ :  $m/z = 339.1526$ , found:  $m/z = 339.1528$ ; IR ( $\text{v}/\text{cm}^{-1}$ , neat): 3342, 3059, 2915, 2809, 1661, 1496, 1460, 1370, 1293, 1263, 1031, 911, 728, 700.

#### 4. Stern-Volmer fluorescence quenching experiments

Fluorescence quenching studies were conducted using Quanta Master 7 (Photon Technology International, USA) of the Hilvert group at ETH Zürich. In each experiment, photocatalyst Ir[(ppy)<sub>2</sub>dtbbpy]PF<sub>6</sub> (100 μM in degassed MeCN) and varying concentrations of quenchers (100, 200, 300, 400, and 500 μM in degassed MeCN) were added into screw-top 1.0 cm quartz cuvettes. Each sample was irradiated at 460 nm, and the emission spectrum was collected. Plots of intensity of emission (580 nm) vs. concentrations of quenchers are shown according to the Stern-Volmer analysis  $I_0/I = 1 + k_q\tau_0[Q]$ .

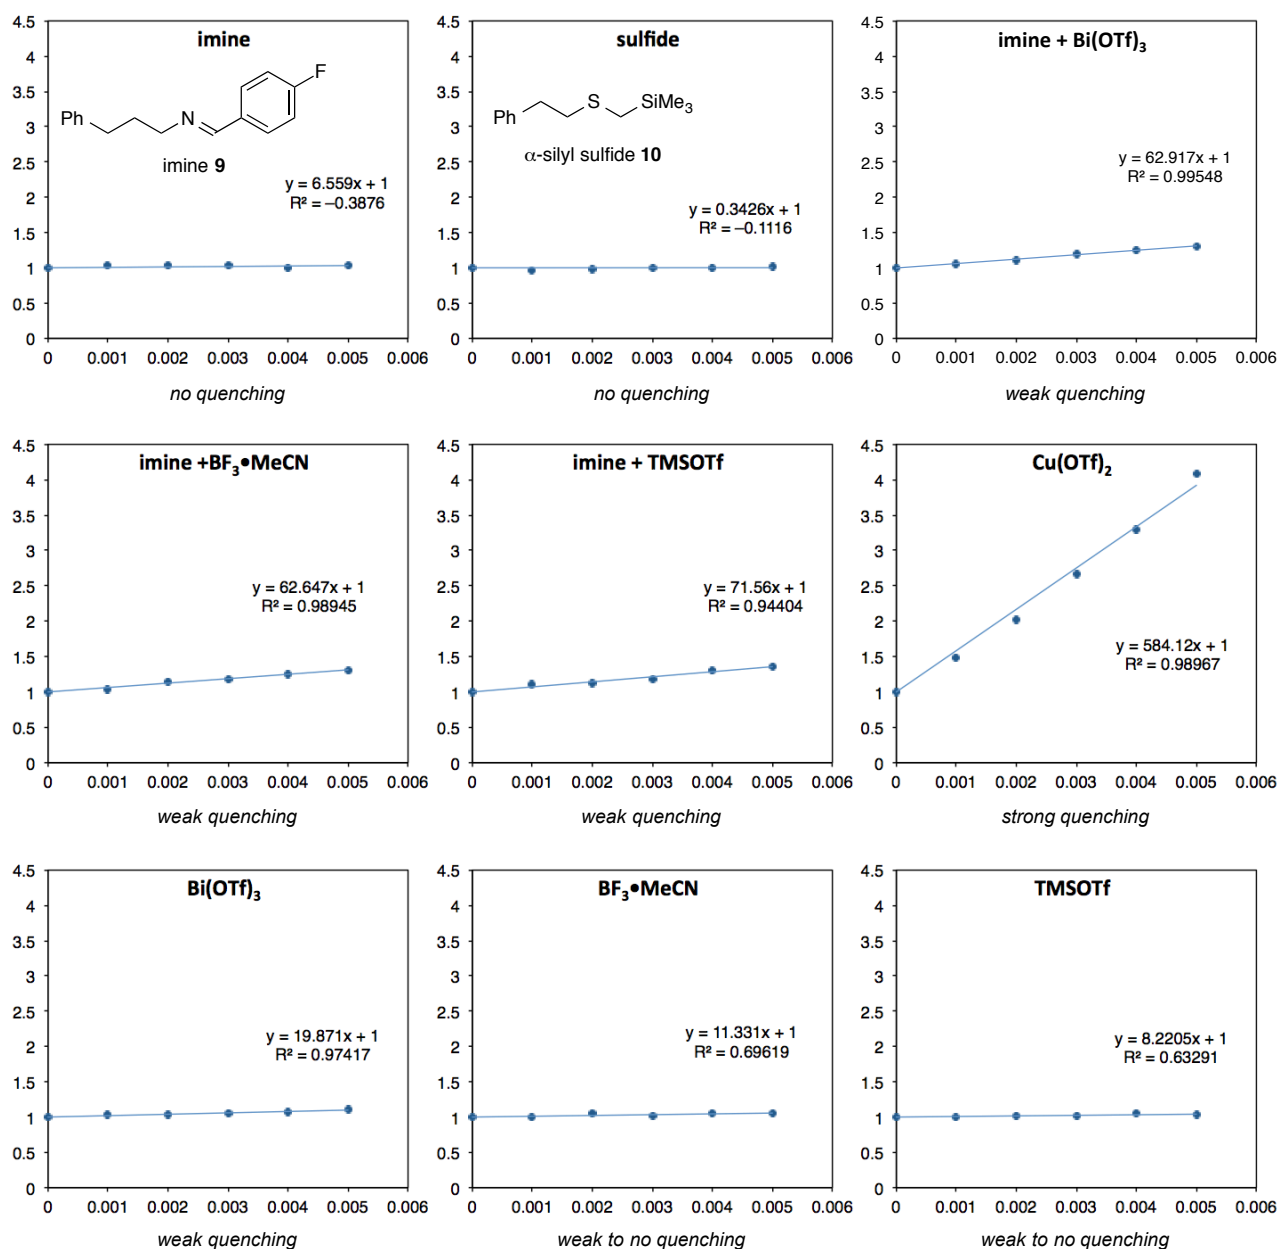

**Figure S3.** Stern–Volmer relationships of Ir[(ppy)<sub>2</sub>dtbbpy]PF<sub>6</sub> with different quenchers. The plots were presented as  $I_0/I$  (y-axis) vs. concentration of quenchers [M] (x-axis).

It is worth noting that the  $\lambda_{max}$  of photoexcited Ir[(ppy)<sub>2</sub>dtbbpy]PF<sub>6</sub> species is not affected by the additional Lewis acids.



### 5. Cyclic voltammogram of several reaction components

Cyclic voltammetry experiment was performed at room temperature using Metrohm Autolab PGSTAT128N of the Copéret group at ETH Zürich, with a Metrohm 3 mm glassy carbon disk or a Metrohm 3 mm Pt disk as the working electrode, a Pt sheet as counter electrode, and a 0.1 M  $\text{Ag}^+/\text{Ag}$  reference electrode in 0.1 M  $\text{NBu}_4\text{PF}_6$  in MeCN. Ferrocenium/ferrocene redox couple was used as an internal standard for the reference at +0.40 V vs. SCE in MeCN,<sup>16</sup> unless otherwise stated.

(a) Cyclic voltammograms of  $\alpha$ -silyl sulfide **10** with Lewis acids display no significant changes for oxidation on the sulfur of the sulfide substrate.

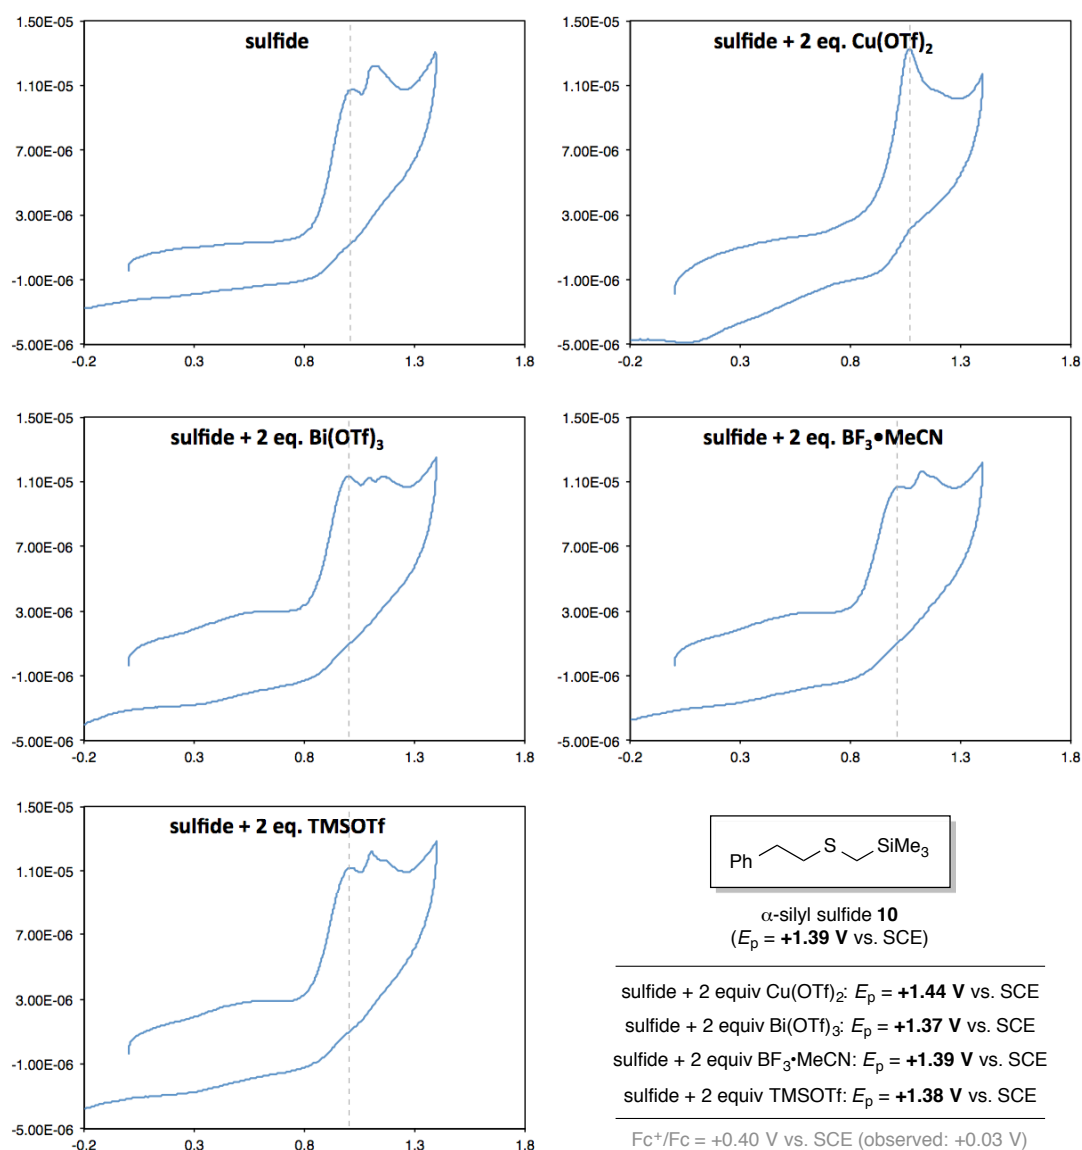

**Figure S4.** Cyclic voltammograms of  $\alpha$ -silyl sulfide **10** with Lewis acids. The cyclic voltammetry experiments were conducted using a glassy carbon electrode under 0.1 M  $\text{LiCO}_4$  in MeCN. Values of peak potential were shown corrected.

(b) The peak potential for the reduction of  $\text{BF}_3 \cdot \text{MeCN}$  was measured below  $-0.3$  V vs. SCE.

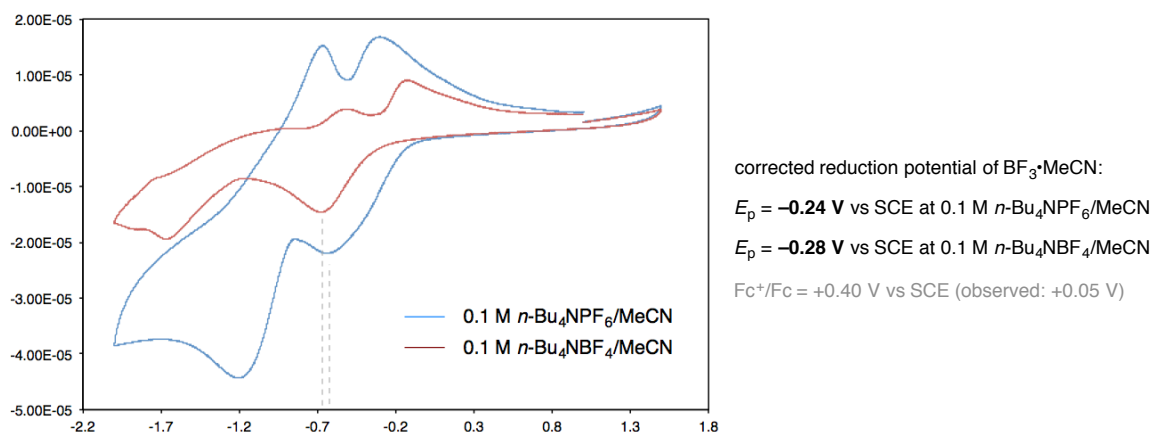

**Figure S5.** Cyclic voltammograms of  $\text{BF}_3 \cdot \text{MeCN}$ . The cyclic voltammetry experiments were conducted using a Pt electrode under 0.1 M  $n\text{-Bu}_4\text{NPF}_6$  or  $n\text{-Bu}_4\text{NBF}_4$  in MeCN. Values of peak potential were shown corrected.

(c) The additional TMSOTf affects the redox abilities of iridium complex only in its reductive quenching cycle (decrease of oxidation potential and increase of reduction ability). The reduction of TMSOTf was also observed ( $E_p = -0.18$  V vs. SCE).

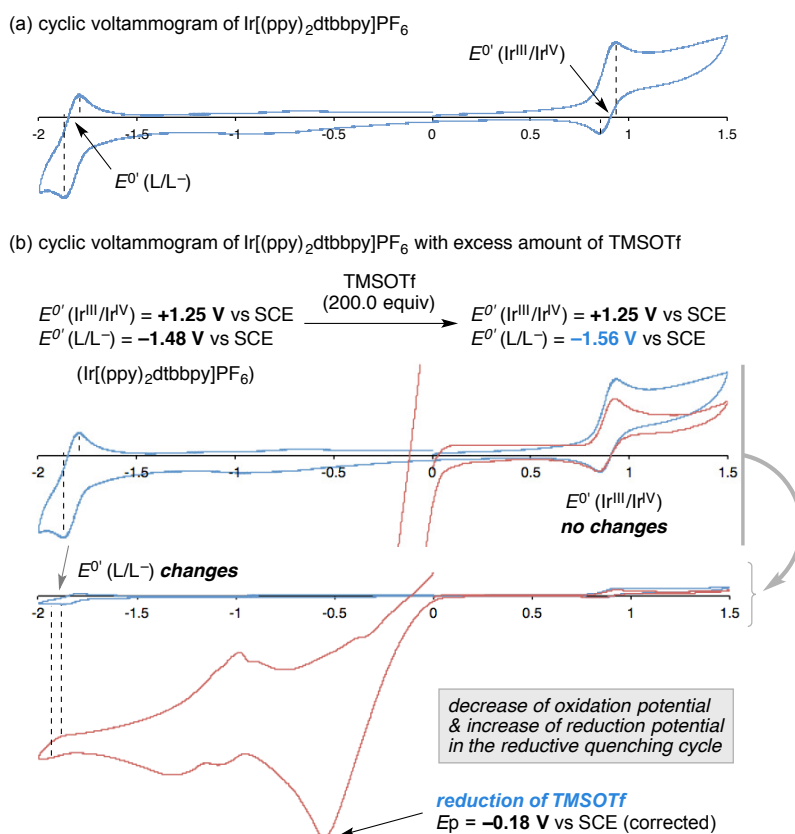

**Figure S6.** Cyclic voltammograms of (a)  $\text{Ir}[(\text{ppy})_2\text{dtbbpy}]\text{PF}_6$  and (b)  $\text{Ir}[(\text{ppy})_2\text{dtbbpy}]\text{PF}_6$  with excess amount of TMSOTf. The cyclic voltammetry experiments were conducted using a Pt electrode at 0.1 M  $n\text{-Bu}_4\text{NPF}_6$  in MeCN. Values of peak potential were shown corrected. ( $\text{Fc}^+/\text{Fc} = +0.40$  V vs. SCE; observed:  $+0.05$  V)

## 6. X-ray crystallography

### 6.1 Crystal structure of 14a

Crystals of **14a** were obtained by recrystallization from EtOAc. The X-ray data was collected to confirm the relative stereochemistry.

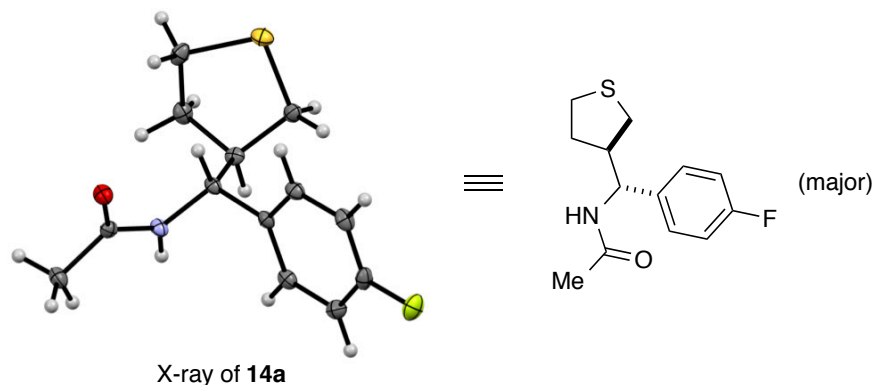

**Figure S7.** ORTEP representation of **14a**. Ellipsoids include 50% of the electron density. We thank Dr. Nils Trapp from the X-ray crystallographic service of the Laboratorium für Organische Chemie at ETH Zürich for performing the experiments.

### Experimental

A suitable single crystal of **14a** [C<sub>13</sub>H<sub>16</sub>FNOS, code: cu\_jb221115\_1\_1\_0ma] was selected and measured on a Bruker Apex2 Duo (Cu) diffractometer. The crystal was kept at 100.0(2) K during data collection. Using Olex2,<sup>17</sup> the structure was solved with the XT<sup>18</sup> structure solution program using Direct Methods and refined with the XL<sup>19</sup> refinement package using Least Squares minimization.

### Crystal structure determination of 14a

Crystal Data for C<sub>13</sub>H<sub>16</sub>FNOS (*M* = 253.33 g/mol): orthorhombic, space group Fdd2 (no. 43), *a* = 26.3399(8) Å, *b* = 35.7236(11) Å, *c* = 5.1728(2) Å, *V* = 4867.4(3) Å<sup>3</sup>, *Z* = 16, *T* = 100.0(2) K,  $\mu(\text{CuK}\alpha)$  = 2.342 mm<sup>-1</sup>, *D*<sub>calc</sub> = 1.383 g/cm<sup>3</sup>, 15523 reflections measured (8.342° ≤ 2 $\Theta$  ≤ 133.346°), 2111 unique (*R*<sub>int</sub> = 0.0288, *R*<sub>sigma</sub> = 0.0165) which were used in all calculations. The final *R*<sub>1</sub> was 0.0231 (*I* > 2 $\sigma$ (*I*)) and *wR*<sub>2</sub> was 0.0595 (all data).

**Table S2.** Crystal data and structure refinement for **14a**.

|                                             |                                                               |
|---------------------------------------------|---------------------------------------------------------------|
| Identification code                         | cu_jb221115_1_1_0ma                                           |
| Empirical formula                           | C <sub>13</sub> H <sub>16</sub> FNOS                          |
| Formula weight                              | 253.33                                                        |
| Temperature/K                               | 100.0(2)                                                      |
| Crystal system                              | orthorhombic                                                  |
| Space group                                 | Fdd2                                                          |
| a/Å                                         | 26.3399(8)                                                    |
| b/Å                                         | 35.7236(11)                                                   |
| c/Å                                         | 5.1728(2)                                                     |
| $\alpha$ /°                                 | 90                                                            |
| $\beta$ /°                                  | 90                                                            |
| $\gamma$ /°                                 | 90                                                            |
| Volume/Å <sup>3</sup>                       | 4867.4(3)                                                     |
| Z                                           | 16                                                            |
| $\rho_{\text{calc}}$ /cm <sup>3</sup>       | 1.383                                                         |
| $\mu$ /mm <sup>-1</sup>                     | 2.342                                                         |
| F(000)                                      | 2144.0                                                        |
| Crystal size/mm <sup>3</sup>                | 0.24 × 0.23 × 0.11                                            |
| Radiation                                   | CuK $\alpha$ ( $\lambda$ = 1.54178)                           |
| 2 $\theta$ range for data collection/°      | 8.342 to 133.346                                              |
| Index ranges                                | -25 ≤ h ≤ 30, -41 ≤ k ≤ 41, -6 ≤ l ≤ 6                        |
| Reflections collected                       | 15523                                                         |
| Independent reflections                     | 2111 [R <sub>int</sub> = 0.0288, R <sub>sigma</sub> = 0.0165] |
| Data/restraints/parameters                  | 2111/2/158                                                    |
| Goodness-of-fit on F <sup>2</sup>           | 1.060                                                         |
| Final R indexes [I >= 2 $\sigma$ (I)]       | R <sub>1</sub> = 0.0231, wR <sub>2</sub> = 0.0595             |
| Final R indexes [all data]                  | R <sub>1</sub> = 0.0231, wR <sub>2</sub> = 0.0595             |
| Largest diff. peak/hole / e Å <sup>-3</sup> | 0.17/-0.22                                                    |
| Flack parameter                             | 0.013(4)                                                      |

**Table S3.** Fractional Atomic Coordinates (×10<sup>4</sup>) and Equivalent Isotropic Displacement Parameters (Å<sup>2</sup>×10<sup>3</sup>) for **14a**. U<sub>eq</sub> is defined as 1/3 of the trace of the orthogonalised U<sub>ij</sub> tensor.

| Atom | x         | y         | z         | U(eq)     |
|------|-----------|-----------|-----------|-----------|
| S1   | 4281.2(2) | 2810.0(2) | 2121.6(9) | 19.87(15) |
| F2   | 7015.0(4) | 2739.8(3) | 4713(3)   | 26.8(3)   |
| O3   | 5251.3(5) | 4004.9(4) | -682(3)   | 17.8(3)   |
| C4   | 6271.5(7) | 2830.0(5) | 2265(5)   | 18.7(4)   |
| N5   | 5187.1(6) | 3887.8(5) | 3602(4)   | 14.4(4)   |
| C6   | 5812.3(7) | 3017.6(5) | 1940(4)   | 16.6(4)   |
| C7   | 5145.4(7) | 3481.6(5) | 3288(4)   | 13.6(4)   |
| C8   | 5309.4(8) | 4528.1(5) | 2214(5)   | 20.2(4)   |
| C9   | 4666.6(7) | 2908.4(6) | 4985(4)   | 17.1(4)   |
| C10  | 6567.3(7) | 2924.4(5) | 4351(5)   | 18.1(4)   |
| C11  | 5246.7(6) | 4117.6(6) | 1570(4)   | 13.6(4)   |
| C12  | 6430.2(8) | 3195.4(6) | 6113(4)   | 18.4(4)   |
| C13  | 4726.2(7) | 3334.2(5) | 5110(4)   | 14.8(4)   |
| C14  | 4053.6(7) | 3291.5(6) | 1819(5)   | 19.5(4)   |
| C15  | 5966.5(8) | 3376.8(6) | 5783(4)   | 16.1(4)   |
| C16  | 5654.7(7) | 3289.1(5) | 3686(4)   | 13.9(4)   |
| C17  | 4202.5(7) | 3486.4(5) | 4326(5)   | 18.7(4)   |

**Table S4.** Anisotropic Displacement Parameters ( $\text{\AA}^2 \times 10^3$ ) for **14a**. The Anisotropic displacement factor exponent takes the form:  $-2\pi^2[h^2a^2U_{11}+2hka*b*U_{12}+\dots]$ .

| Atom | $U_{11}$ | $U_{22}$ | $U_{33}$ | $U_{23}$ | $U_{13}$ | $U_{12}$  |
|------|----------|----------|----------|----------|----------|-----------|
| S1   | 22.0(2)  | 19.8(2)  | 17.8(3)  | -4.4(2)  | -0.3(2)  | -2.94(18) |
| F2   | 19.3(6)  | 29.8(6)  | 31.2(8)  | 1.6(7)   | 0.0(6)   | 9.4(5)    |
| O3   | 24.6(7)  | 16.1(7)  | 12.8(8)  | -0.5(6)  | 1.8(6)   | -0.5(5)   |
| C4   | 22.6(10) | 15.6(9)  | 17.8(11) | -2.1(9)  | 5.6(10)  | 1.7(7)    |
| N5   | 19.1(8)  | 12.1(8)  | 11.9(9)  | -2.2(7)  | 1.2(7)   | 0.1(6)    |
| C6   | 19.3(9)  | 15.5(9)  | 15(1)    | -1.6(9)  | 1.3(9)   | -1.6(7)   |
| C7   | 16.8(10) | 11.8(9)  | 12.2(10) | -1.3(8)  | 1.8(7)   | -0.5(7)   |
| C8   | 26.4(10) | 12.9(9)  | 21.2(11) | -0.4(10) | 1.3(9)   | -1.3(7)   |
| C9   | 16(1)    | 17.7(9)  | 17.6(11) | 3.5(8)   | -0.5(8)  | -1.5(7)   |
| C10  | 14.3(9)  | 17.8(9)  | 22.1(11) | 5.7(9)   | 3.6(8)   | 2.7(7)    |
| C11  | 10.6(8)  | 14.3(9)  | 15.9(11) | -1.2(7)  | 0.6(7)   | 1.1(6)    |
| C12  | 17.8(10) | 21.6(10) | 15.9(11) | 1.5(8)   | -0.2(8)  | -3.1(8)   |
| C13  | 16.5(10) | 17.2(9)  | 10.8(10) | -0.7(8)  | 1.3(8)   | -1.0(7)   |
| C14  | 14.9(9)  | 25.6(10) | 18.1(10) | 4.3(9)   | 0.7(8)   | 2.4(7)    |
| C15  | 19.2(9)  | 14.5(9)  | 14.7(10) | -0.8(8)  | 3.3(8)   | -1.9(8)   |
| C16  | 15.5(10) | 12.1(9)  | 13.9(11) | 1.7(7)   | 2.7(7)   | -2.3(7)   |
| C17  | 17.0(9)  | 17.4(9)  | 21.8(12) | -0.1(9)  | 5.8(9)   | 2.0(7)    |

**Table S5.** Bond Lengths for **14a**.

| Atom | Atom | Length/ $\text{\AA}$ | Atom | Atom | Length/ $\text{\AA}$ |
|------|------|----------------------|------|------|----------------------|
| S1   | C9   | 1.830(2)             | C7   | C13  | 1.544(3)             |
| S1   | C14  | 1.828(2)             | C7   | C16  | 1.522(3)             |
| F2   | C10  | 1.364(2)             | C8   | C11  | 1.513(3)             |
| O3   | C11  | 1.233(3)             | C9   | C13  | 1.530(3)             |
| C4   | C6   | 1.393(3)             | C10  | C12  | 1.378(3)             |
| C4   | C10  | 1.373(3)             | C12  | C15  | 1.393(3)             |
| N5   | C7   | 1.464(2)             | C13  | C17  | 1.537(3)             |
| N5   | C11  | 1.343(3)             | C14  | C17  | 1.524(3)             |
| C6   | C16  | 1.389(3)             | C15  | C16  | 1.396(3)             |

**Table S6.** Bond Angles for **14a**.

| Atom | Atom | Atom | Angle/ $^\circ$ | Atom | Atom | Atom | Angle/ $^\circ$ |
|------|------|------|-----------------|------|------|------|-----------------|
| C14  | S1   | C9   | 94.04(10)       | O3   | C11  | C8   | 121.58(19)      |
| C10  | C4   | C6   | 118.00(19)      | N5   | C11  | C8   | 115.65(19)      |
| C11  | N5   | C7   | 121.85(18)      | C10  | C12  | C15  | 118.40(19)      |
| C16  | C6   | C4   | 121.1(2)        | C9   | C13  | C7   | 112.74(16)      |
| N5   | C7   | C13  | 108.91(16)      | C9   | C13  | C17  | 104.39(15)      |
| N5   | C7   | C16  | 111.51(15)      | C17  | C13  | C7   | 111.10(16)      |
| C16  | C7   | C13  | 113.18(16)      | C17  | C14  | S1   | 105.82(14)      |
| C13  | C9   | S1   | 106.38(14)      | C12  | C15  | C16  | 120.4(2)        |
| F2   | C10  | C4   | 118.66(18)      | C6   | C16  | C7   | 119.40(18)      |
| F2   | C10  | C12  | 118.40(19)      | C6   | C16  | C15  | 119.09(19)      |
| C4   | C10  | C12  | 122.93(18)      | C15  | C16  | C7   | 121.50(18)      |
| O3   | C11  | N5   | 122.77(18)      | C14  | C17  | C13  | 107.09(16)      |

**Table S7.** Torsion Angles for **14a**.

| A  | B   | C   | D   | Angle/°     | A   | B   | C   | D   | Angle/°     |
|----|-----|-----|-----|-------------|-----|-----|-----|-----|-------------|
| S1 | C9  | C13 | C7  | -80.84(18)  | C7  | C13 | C17 | C14 | 71.34(19)   |
| S1 | C9  | C13 | C17 | 39.85(18)   | C9  | S1  | C14 | C17 | -11.91(15)  |
| S1 | C14 | C17 | C13 | 37.47(18)   | C9  | C13 | C17 | C14 | -50.4(2)    |
| F2 | C10 | C12 | C15 | -178.29(17) | C10 | C4  | C6  | C16 | -0.7(3)     |
| C4 | C6  | C16 | C7  | -178.76(17) | C10 | C12 | C15 | C16 | -1.1(3)     |
| C4 | C6  | C16 | C15 | 0.7(3)      | C11 | N5  | C7  | C13 | -138.17(18) |
| C4 | C10 | C12 | C15 | 1.1(3)      | C11 | N5  | C7  | C16 | 96.2(2)     |
| N5 | C7  | C13 | C9  | -178.05(17) | C12 | C15 | C16 | C6  | 0.2(3)      |
| N5 | C7  | C13 | C17 | 65.2(2)     | C12 | C15 | C16 | C7  | 179.69(18)  |
| N5 | C7  | C16 | C6  | -133.87(19) | C13 | C7  | C16 | C6  | 102.9(2)    |
| N5 | C7  | C16 | C15 | 46.7(3)     | C13 | C7  | C16 | C15 | -76.5(2)    |
| C6 | C4  | C10 | F2  | 179.21(17)  | C14 | S1  | C9  | C13 | -16.49(15)  |
| C6 | C4  | C10 | C12 | -0.2(3)     | C16 | C7  | C13 | C9  | -53.4(2)    |
| C7 | N5  | C11 | O3  | 2.7(3)      | C16 | C7  | C13 | C17 | -170.21(16) |
| C7 | N5  | C11 | C8  | -177.16(17) |     |     |     |     |             |

**Table S8.** Hydrogen Atom Coordinates ( $\text{\AA} \times 10^4$ ) and Isotropic Displacement Parameters ( $\text{\AA}^2 \times 10^3$ ) for **14a**.

| Atom | x        | y       | z        | U(eq) |
|------|----------|---------|----------|-------|
| H4   | 6377     | 2642    | 1079     | 22    |
| H6   | 5603     | 2959    | 499      | 20    |
| H7   | 5035     | 3431    | 1472     | 16    |
| H8A  | 5629     | 4620    | 1481     | 30    |
| H8B  | 5315     | 4560    | 4096     | 30    |
| H8C  | 5025     | 4670    | 1483     | 30    |
| H9A  | 4496     | 2814    | 6561     | 21    |
| H9B  | 5003     | 2786    | 4838     | 21    |
| H12  | 6647     | 3257    | 7519     | 22    |
| H13  | 4804     | 3411    | 6926     | 18    |
| H14A | 4214     | 3416    | 318      | 23    |
| H14B | 3681     | 3296    | 1586     | 23    |
| H15  | 5862     | 3561    | 6993     | 19    |
| H17A | 3950     | 3433    | 5694     | 22    |
| H17B | 4219     | 3761    | 4064     | 22    |
| H5   | 5208(10) | 3984(8) | 5150(50) | 28    |

## 6.2 Crystal structure of 14b

Crystals of **14b** were obtained by recrystallization from EtOAc. The X-ray data was collected to confirm the relative stereochemistry.

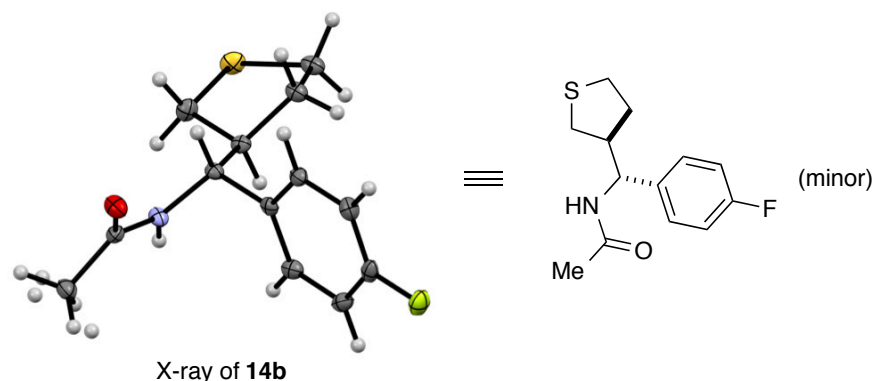

**Figure S8.** ORTEP representation of **14b**. Ellipsoids include 50% of the electron density. We thank Dr. Nils Trapp from the X-ray crystallographic service of the Laboratorium für Organische Chemie at ETH Zürich for performing the experiments.

## Experimental

A suitable single crystal of **14b** [ $C_{13}H_{16}FNOS$ , code: cu\_jb221115\_2\_1\_0m] was selected and measured on a Bruker Apex2 Duo (Cu) diffractometer. The crystal was kept at 100.0(2) K during data collection. Using Olex2,<sup>17</sup> the structure was solved with the XT<sup>18</sup> structure solution program using Direct Methods and refined with the XL<sup>19</sup> refinement package using Least Squares minimization.

## Crystal structure determination of 14b

Crystal Data for  $C_{13}H_{16}FNOS$  ( $M=253.33$  g/mol): monoclinic, space group  $P2_1/c$  (no. 14),  $a = 5.11580(10)$  Å,  $b = 17.1099(3)$  Å,  $c = 14.2535(2)$  Å,  $\beta = 99.9200(10)^\circ$ ,  $V = 1228.97(4)$  Å<sup>3</sup>,  $Z = 4$ ,  $T = 100.0(2)$  K,  $\mu(\text{CuK}\alpha) = 2.319$  mm<sup>-1</sup>,  $D_{\text{calc}} = 1.369$  g/cm<sup>3</sup>, 11653 reflections measured ( $8.146^\circ \leq 2\Theta \leq 133.388^\circ$ ), 2146 unique ( $R_{\text{int}} = 0.0283$ ,  $R_{\text{sigma}} = 0.0209$ ) which were used in all calculations. The final  $R_1$  was 0.0281 ( $I > 2\sigma(I)$ ) and  $wR_2$  was 0.0711 (all data).

**Table S9.** Crystal data and structure refinement for **14b**.

|                                             |                                                               |
|---------------------------------------------|---------------------------------------------------------------|
| Identification code                         | cu_jb221115_2_1_0m                                            |
| Empirical formula                           | C <sub>13</sub> H <sub>16</sub> FNOS                          |
| Formula weight                              | 253.33                                                        |
| Temperature/K                               | 100.0(2)                                                      |
| Crystal system                              | monoclinic                                                    |
| Space group                                 | P2 <sub>1</sub> /c                                            |
| a/Å                                         | 5.11580(10)                                                   |
| b/Å                                         | 17.1099(3)                                                    |
| c/Å                                         | 14.2535(2)                                                    |
| α/°                                         | 90                                                            |
| β/°                                         | 99.9200(10)                                                   |
| γ/°                                         | 90                                                            |
| Volume/Å <sup>3</sup>                       | 1228.97(4)                                                    |
| Z                                           | 4                                                             |
| ρ <sub>calc</sub> /g/cm <sup>3</sup>        | 1.369                                                         |
| μ/mm <sup>-1</sup>                          | 2.319                                                         |
| F(000)                                      | 536.0                                                         |
| Crystal size/mm <sup>3</sup>                | 0.24 × 0.12 × 0.08                                            |
| Radiation                                   | CuKα (λ = 1.54178)                                            |
| 2θ range for data collection/°              | 8.146 to 133.388                                              |
| Index ranges                                | -5 ≤ h ≤ 6, -20 ≤ k ≤ 15, -15 ≤ l ≤ 16                        |
| Reflections collected                       | 11653                                                         |
| Independent reflections                     | 2146 [R <sub>int</sub> = 0.0283, R <sub>sigma</sub> = 0.0209] |
| Data/restraints/parameters                  | 2146/1/159                                                    |
| Goodness-of-fit on F <sup>2</sup>           | 1.057                                                         |
| Final R indexes [I ≥ 2σ (I)]                | R <sub>1</sub> = 0.0281, wR <sub>2</sub> = 0.0706             |
| Final R indexes [all data]                  | R <sub>1</sub> = 0.0287, wR <sub>2</sub> = 0.0711             |
| Largest diff. peak/hole / e Å <sup>-3</sup> | 0.26/-0.27                                                    |
| Identification code                         | cu_jb221115_2_1_0m                                            |

**Table S10.** Fractional Atomic Coordinates (×10<sup>4</sup>) and Equivalent Isotropic Displacement Parameters (Å<sup>2</sup>×10<sup>3</sup>) for **14b**. U<sub>eq</sub> is defined as 1/3 of of the trace of the orthogonalised U<sub>ij</sub> tensor.

| Atom | x           | y         | z          | U(eq)     |
|------|-------------|-----------|------------|-----------|
| S1   | -409.9(6)   | 4197.8(2) | 3369.7(2)  | 21.63(12) |
| F2   | 6760.3(16)  | -74.0(5)  | 6092.3(6)  | 24.0(2)   |
| O3   | 10021.3(18) | 3548.0(6) | 6519.3(7)  | 20.5(2)   |
| N4   | 5549(2)     | 3591.2(6) | 6149.2(8)  | 14.9(2)   |
| C5   | 7860(3)     | 3719.8(7) | 6737.4(9)  | 14.7(3)   |
| C6   | 6443(3)     | 702.4(8)  | 5895.6(9)  | 17.4(3)   |
| C7   | 5824(2)     | 2276.2(7) | 5490.6(8)  | 13.2(3)   |
| C8   | 4366(2)     | 1914.0(8) | 6108.6(9)  | 16.7(3)   |
| C9   | 5452(2)     | 3143.5(7) | 5269.1(9)  | 13.2(3)   |
| C10  | 2805(2)     | 3301.4(7) | 4608.8(9)  | 13.9(3)   |
| C11  | -2(3)       | 3177.3(8) | 3037.3(9)  | 18.1(3)   |
| C12  | 7916(3)     | 1032.4(8) | 5277.8(9)  | 18.0(3)   |
| C13  | 7642(3)     | 4080.9(8) | 7682(1)    | 20.2(3)   |
| C14  | 2594(2)     | 2901.6(8) | 3639.0(9)  | 16.6(3)   |
| C15  | 2313(3)     | 4168.0(8) | 4388.5(10) | 19.3(3)   |
| C16  | 7586(2)     | 1824.9(8) | 5077.8(9)  | 15.5(3)   |
| C17  | 4663(3)     | 1123.7(8) | 6318.4(9)  | 18.6(3)   |



**Table S11.** Anisotropic Displacement Parameters ( $\text{\AA}^2 \times 10^3$ ) for **14b**. The Anisotropic displacement factor exponent takes the form:  $-2\pi^2[h^2a^2U_{11}+2hka*b*U_{12}+\dots]$ .

| Atom | $U_{11}$  | $U_{22}$  | $U_{33}$  | $U_{23}$ | $U_{13}$  | $U_{12}$ |
|------|-----------|-----------|-----------|----------|-----------|----------|
| S1   | 19.12(19) | 21.30(19) | 22.96(19) | 5.38(13) | -0.59(13) | 4.22(13) |
| F2   | 27.8(4)   | 14.7(4)   | 27.4(4)   | 3.3(3)   | -1.0(3)   | -0.8(3)  |
| O3   | 12.3(5)   | 29.9(5)   | 19.7(5)   | -4.9(4)  | 3.5(4)    | -1.5(4)  |
| N4   | 11.3(5)   | 18.4(6)   | 15.8(5)   | -3.6(4)  | 5.0(4)    | -0.1(4)  |
| C5   | 14.9(6)   | 13.7(6)   | 15.8(6)   | 0.0(5)   | 3.8(5)    | -2.5(5)  |
| C6   | 17.4(6)   | 14.3(6)   | 17.6(6)   | 1.0(5)   | -5.5(5)   | -2.1(5)  |
| C7   | 9.7(6)    | 17.4(6)   | 11.2(6)   | -0.7(5)  | -1.8(5)   | -1.3(5)  |
| C8   | 12.8(6)   | 22.2(7)   | 14.9(6)   | 0.7(5)   | 2.0(5)    | 0.7(5)   |
| C9   | 11.0(6)   | 16.6(6)   | 12.6(6)   | -1.4(5)  | 3.3(5)    | -0.4(5)  |
| C10  | 10.8(6)   | 16.5(6)   | 14.9(6)   | 0.3(5)   | 3.2(5)    | 0.5(5)   |
| C11  | 13.6(6)   | 25.5(7)   | 15.3(6)   | -0.1(5)  | 2.9(5)    | 1.7(5)   |
| C12  | 16.2(6)   | 18.1(7)   | 19.2(7)   | -3.8(5)  | 1.3(5)    | 0.7(5)   |
| C13  | 22.4(7)   | 21.8(7)   | 17.2(7)   | -4.9(5)  | 5.5(5)    | -2.5(6)  |
| C14  | 12.8(6)   | 21.9(7)   | 14.9(6)   | -0.9(5)  | 2.2(5)    | 1.5(5)   |
| C15  | 17.6(7)   | 17.4(7)   | 22.0(7)   | 1.8(5)   | 0.6(5)    | 1.1(5)   |
| C16  | 14.1(6)   | 17.9(7)   | 14.9(6)   | -1.7(5)  | 3.1(5)    | -2.5(5)  |
| C17  | 16.4(6)   | 22.7(7)   | 16.1(6)   | 4.2(5)   | 0.8(5)    | -3.8(5)  |

**Table S12.** Bond Lengths for **14b**.

| Atom | Atom | Length/ $\text{\AA}$ | Atom | Atom | Length/ $\text{\AA}$ |
|------|------|----------------------|------|------|----------------------|
| S1   | C11  | 1.8305(14)           | C7   | C8   | 1.3940(18)           |
| S1   | C15  | 1.8316(14)           | C7   | C9   | 1.5223(17)           |
| F2   | C6   | 1.3616(15)           | C7   | C16  | 1.3918(18)           |
| O3   | C5   | 1.2345(16)           | C8   | C17  | 1.388(2)             |
| N4   | C5   | 1.3446(17)           | C9   | C10  | 1.5341(17)           |
| N4   | C9   | 1.4634(16)           | C10  | C14  | 1.5294(17)           |
| C5   | C13  | 1.5028(18)           | C10  | C15  | 1.5276(18)           |
| C6   | C12  | 1.375(2)             | C11  | C14  | 1.5263(18)           |
| C6   | C17  | 1.379(2)             | C12  | C16  | 1.3899(19)           |

**Table S13.** Bond Angles for **14b**.

| Atom | Atom | Atom | Angle/ $^\circ$ | Atom | Atom | Atom | Angle/ $^\circ$ |
|------|------|------|-----------------|------|------|------|-----------------|
| C11  | S1   | C15  | 94.22(6)        | N4   | C9   | C7   | 110.37(10)      |
| C5   | N4   | C9   | 121.10(10)      | N4   | C9   | C10  | 109.25(10)      |
| O3   | C5   | N4   | 122.24(12)      | C7   | C9   | C10  | 111.39(10)      |
| O3   | C5   | C13  | 122.09(12)      | C14  | C10  | C9   | 113.14(10)      |
| N4   | C5   | C13  | 115.66(11)      | C15  | C10  | C9   | 113.19(10)      |
| F2   | C6   | C12  | 118.26(12)      | C15  | C10  | C14  | 105.36(10)      |
| F2   | C6   | C17  | 118.97(12)      | C14  | C11  | S1   | 106.05(9)       |
| C12  | C6   | C17  | 122.77(12)      | C6   | C12  | C16  | 118.12(12)      |
| C8   | C7   | C9   | 120.19(11)      | C11  | C14  | C10  | 106.78(10)      |
| C16  | C7   | C8   | 118.46(12)      | C10  | C15  | S1   | 105.41(9)       |
| C16  | C7   | C9   | 121.34(11)      | C12  | C16  | C7   | 121.28(12)      |
| C17  | C8   | C7   | 121.24(12)      | C6   | C17  | C8   | 118.13(12)      |

**Table S14.** Torsion Angles for **14b**.

| A  | B   | C   | D   | Angle/°     | A   | B   | C   | D   | Angle/°     |
|----|-----|-----|-----|-------------|-----|-----|-----|-----|-------------|
| S1 | C11 | C14 | C10 | 35.73(12)   | C9  | N4  | C5  | C13 | -171.19(11) |
| F2 | C6  | C12 | C16 | 179.94(11)  | C9  | C7  | C8  | C17 | 179.74(11)  |
| F2 | C6  | C17 | C8  | -179.95(11) | C9  | C7  | C16 | C12 | -179.74(11) |
| N4 | C9  | C10 | C14 | 176.05(10)  | C9  | C10 | C14 | C11 | -174.55(10) |
| N4 | C9  | C10 | C15 | 56.28(14)   | C9  | C10 | C15 | S1  | 165.27(8)   |
| C5 | N4  | C9  | C7  | 74.48(14)   | C11 | S1  | C15 | C10 | -18.00(10)  |
| C5 | N4  | C9  | C10 | -162.73(11) | C12 | C6  | C17 | C8  | -0.16(19)   |
| C6 | C12 | C16 | C7  | 0.20(19)    | C14 | C10 | C15 | S1  | 41.14(11)   |
| C7 | C8  | C17 | C6  | -0.18(19)   | C15 | S1  | C11 | C14 | -10.03(10)  |
| C7 | C9  | C10 | C14 | -61.76(13)  | C15 | C10 | C14 | C11 | -50.39(13)  |
| C7 | C9  | C10 | C15 | 178.46(10)  | C16 | C7  | C8  | C17 | 0.51(18)    |
| C8 | C7  | C9  | N4  | 48.09(15)   | C16 | C7  | C9  | N4  | -132.70(12) |
| C8 | C7  | C9  | C10 | -73.44(14)  | C16 | C7  | C9  | C10 | 105.76(13)  |
| C8 | C7  | C16 | C12 | -0.52(19)   | C17 | C6  | C12 | C16 | 0.15(19)    |
| C9 | N4  | C5  | O3  | 8.36(19)    |     |     |     |     |             |

**Table S15.** Hydrogen Atom Coordinates ( $\text{\AA} \times 10^4$ ) and Isotropic Displacement Parameters ( $\text{\AA}^2 \times 10^3$ ) for **14b**.

| Atom | x     | y    | z    | U(eq) |
|------|-------|------|------|-------|
| H8   | 3145  | 2214 | 6392 | 20    |
| H9   | 6928  | 3324 | 4944 | 16    |
| H10  | 1339  | 3102 | 4926 | 17    |
| H11A | -1506 | 2857 | 3171 | 22    |
| H11B | 85    | 3136 | 2351 | 22    |
| H12  | 9125  | 727  | 4996 | 22    |
| H13A | 5770  | 4172 | 7716 | 30    |
| H13B | 8415  | 3727 | 8196 | 30    |
| H13C | 8600  | 4579 | 7750 | 30    |
| H13D | 6752  | 3715 | 8052 | 30    |
| H13E | 6611  | 4565 | 7578 | 30    |
| H13F | 9422  | 4197 | 8031 | 30    |
| H14A | 4118  | 3048 | 3332 | 20    |
| H14B | 2585  | 2326 | 3714 | 20    |
| H15A | 3923  | 4418 | 4227 | 23    |
| H15B | 1811  | 4443 | 4943 | 23    |

**Table S16.** Atomic Occupancy for **14b**.

| Atom Occupancy | Atom Occupancy | Atom Occupancy |
|----------------|----------------|----------------|
| H13A 0.650(18) | H13B 0.650(18) | H13C 0.650(18) |
| H13D 0.350(18) | H13E 0.350(18) | H13F 0.350(18) |

## 7. References

- (1) Leonard, J.; Lygo, B.; Procter, G. *Advanced Practical Organic Chemistry*, 2nd ed., CRC Press, Taylor & Francis, 1998.
- (2) Still, W. C.; Kahn, M.; Mitra, A. Rapid chromatographic technique for preparative separations with moderate resolution. *J. Org. Chem.* **1978**, *43*, 2923–2925.
- (3) Guda, D. R.; Park, S.-J.; Lee, M.-W.; Kim, T.-J.; Lee, M. E. Syntheses and anti-allergic activity of 2-((bis(trimethylsilyl)methylthio/methylsulfonyl)methyl)-5-aryl-1,3,4-oxadiazoles. *Eur. J. Med. Chem.* **2013**, *62*, 84–88.
- (4) Anderson, W. K.; Milowsky, A. S. Synthesis and antineoplastic activity of bis[[[(alkylamino)carbonyl]oxy]methyl]-substituted 3-pyrrolines as prodrugs of tumor inhibitory pyrrolebis(carbamates). *J. Med. Chem.* **1986**, *29*, 2241–2249.
- (5) Ponard Pharmaceuticals, Inc.; Sun, C. L.; Li, X. Rapamycin analogs as anti-cancer agents. WO 2009/131631 A1, **2009**.
- (6) Yoon, U. C.; Mariano, P. S. Mechanistic and synthetic aspects of amine–enone single electron transfer photochemistry. *Acc. Chem. Res.* **1992**, *25*, 233–240.
- (7) Yoon, U. C.; Kwon, H. C.; Hyung, T. G.; Choi, K. H.; Oh, S. W.; Yang, S.; Zhao, Z.; Mariano, P. S. The photochemistry of polydonor-substituted phthalimides: Curtin–Hammett-type control of competing reactions of potentially interconverting zwitterionic biradical intermediates. *J. Am. Chem. Soc.* **2004**, *126*, 1110–1124.
- (8) Cho, D. W.; Yoon, U. C.; Mariano, P. S. Studies leading to the development of a single-electron transfer (SET) photochemical strategy for syntheses of macrocyclic polyethers, polythioethers, and polyamides. *Acc. Chem. Res.* **2011**, *44*, 204–215.
- (9) Slinker, J. D.; Gorodetsky, A. A.; Lowry, M. S.; Wang, J.; Parker, S.; Rohl, R.; Bernhard, S.; Malliaras, G. G. Efficient yellow electroluminescence from a single layer of a cyclometalated iridium complex. *J. Am. Chem. Soc.* **2004**, *126*, 2763–2767.
- (10) Lowry, M. S.; Goldsmith, J. I.; Slinker, J. D.; Rohl, R.; Pascal, R. A.; Malliaras, G. G.; Bernhard, S. Single-layer electroluminescent devices and photoinduced hydrogen production from an ionic iridium(III) complex. *Chem. Mater.* **2005**, *17*, 5712–5719.
- (11) Uoyama, H.; Goushi, K.; Shizu, K.; Nomura, H.; Adachi, C. Highly efficient organic light-emitting diodes from delayed fluorescence. *Nature* **2012**, *492*, 234–238.
- (12) Luo, J.; Zhang, J. Donor–acceptor fluorophores for visible-light-promoted organic synthesis: photoredox/Ni dual catalytic C(sp<sup>3</sup>)–C(sp<sup>2</sup>) cross-coupling. *ACS Catal.* **2016**, *6*, 873–877.
- (13) Vo, C.-V. T.; Mikutis, G.; Bode, J. W. SnAP reagents for the transformation of aldehydes into substituted thiomorpholines—an alternative to cross-coupling with saturated heterocycles. *Angew. Chem. Int. Ed.* **2013**, *52*, 1705–1708.
- (14) Luescher, M. U.; Bode, J. W. Catalytic synthesis of *N*-unprotected piperazines, morpholines, and thiomorpholines from aldehydes and SnAP reagents. *Angew. Chem. Int. Ed.* **2015**, *54*, 10884–10888.
- (15) Jagdale, A. R.; Youn, S. W. Au<sup>I</sup>-catalyzed intramolecular cyclization of 2-alkenylphenyl carbonyl compounds: exploring the oxophilic Lewis acidity of Au<sup>I</sup> species. *Eur. J. Org. Chem.* **2011**, *2011*, 3904–3910.
- (16) Connelly, N. G.; Geiger, W. E. Chemical redox agents for organometallic chemistry. *Chem. Rev.* **1996**, *96*, 877–910.
- (17) Dolomanov, O. V.; Bourhis, L. J.; Gildea, R. J.; Howard, J. A. K.; Puschmann, H. OLEX2: a complete structure solution, refinement and analysis program. *J. Appl. Cryst.* **2009**, *42*, 339–341.
- (18) Sheldrick, G. M. SHELXT – Integrated space-group and crystalstructure determination. *Acta Cryst.* **2015**, *A71*, 3–8.
- (19) Sheldrick, G. M. A short history of SHELX. *Acta Cryst.* **2008**, *A64*, 112–122.

## 8. NMR spectra

### Table of contents

|                                                                                                                                                                            |     |
|----------------------------------------------------------------------------------------------------------------------------------------------------------------------------|-----|
| 2-(((Trimethylsilyl)methyl)thio)ethanamine ( <b>1a</b> ).....                                                                                                              | S41 |
| 2-((Bis(trimethylsilyl)methyl)thio)ethanamine ( <b>1b</b> ).....                                                                                                           | S42 |
| 3-(((Trimethylsilyl)methyl)thio)propan-1-ol ( <b>S1</b> ).....                                                                                                             | S43 |
| 2-(3-(((Trimethylsilyl)methyl)thio)propyl)isoindoline-1,3-dione ( <b>S2</b> ).....                                                                                         | S44 |
| 3-(((Trimethylsilyl)methyl)thio)propan-1-amine ( <b>1c</b> ).....                                                                                                          | S45 |
| 2-((Trimethylsilyl)methoxy)ethyl 4-methylbenzenesulfonate ( <b>S3</b> ).....                                                                                               | S46 |
| 2-(2-((Trimethylsilyl)methoxy)ethyl)isoindoline-1,3-dione ( <b>S4</b> ).....                                                                                               | S47 |
| 2-((Trimethylsilyl)methoxy)ethan-1-amine ( <b>11</b> ).....                                                                                                                | S48 |
| 3-(4-Fluorophenyl)thiomorpholine ( <b>6a</b> ) (Table S1, entry 4).....                                                                                                    | S49 |
| 3-(4-(Trifluoromethyl)phenyl)thiomorpholine ( <b>6b</b> ) (Scheme 2).....                                                                                                  | S50 |
| 3-(4-Nitrophenyl)thiomorpholine ( <b>6c</b> ) (Scheme 2).....                                                                                                              | S51 |
| Methyl 4-(thiomorpholin-3-yl)benzoate ( <b>6d</b> ) (Scheme 2).....                                                                                                        | S52 |
| 3-(4-Methoxyphenyl)thiomorpholine ( <b>6e</b> ) (Scheme 2).....                                                                                                            | S53 |
| <i>N</i> -(4-(Thiomorpholin-3-yl)phenyl)acetamide ( <b>6f</b> ) (Scheme 2).....                                                                                            | S54 |
| 3-Mesitylthiomorpholine ( <b>6g</b> ) (Scheme 2).....                                                                                                                      | S55 |
| 3-(Thiophen-3-yl)thiomorpholine ( <b>6h</b> ) (Scheme 2).....                                                                                                              | S56 |
| ( <i>E</i> )-3-Styrylthiomorpholine ( <b>6i</b> ) (Scheme 2).....                                                                                                          | S57 |
| 9-Oxa-4-thia-1-azaspiro[5.5]undecane ( <b>6j</b> ) (Scheme 2).....                                                                                                         | S58 |
| <i>trans</i> -3-(4-(Trifluoromethyl)phenyl)-2-(trimethylsilyl)thiomorpholine ( <b>7a</b> ) (Scheme 2).....                                                                 | S59 |
| <i>trans</i> -3-(4-Nitrophenyl)-2-(trimethylsilyl)thiomorpholine ( <b>7b</b> ) (Scheme 2).....                                                                             | S60 |
| <i>trans</i> -3-(4-Fluorophenyl)-2-(trimethylsilyl)thiomorpholine ( <b>7c</b> ) (Scheme 2).....                                                                            | S61 |
| 3-(4-(Trifluoromethyl)phenyl)-1,4-thiazepane ( <b>8a</b> ) (Scheme 2).....                                                                                                 | S62 |
| 3-(1,4-Thiazepan-3-yl)benzotrile ( <b>8b</b> ) (Scheme 2).....                                                                                                             | S63 |
| 3-(3-Bromophenyl)-1,4-thiazepane ( <b>8c</b> ) (Scheme 2).....                                                                                                             | S64 |
| 3-(Pyridin-4-yl)thiomorpholine ( <b>6k</b> ) (Scheme 3).....                                                                                                               | S65 |
| 3-(2-Phenylpyrimidin-5-yl)thiomorpholine ( <b>6l</b> ) (Scheme 3).....                                                                                                     | S66 |
| 3-(1-Benzyl-1 <i>H</i> -imidazol-5-yl)thiomorpholine ( <b>6m</b> ) (Scheme 3).....                                                                                         | S67 |
| 6-Phenyl-5-(thiomorpholin-3-yl)-2,3-dihydroimidazo[2,1- <i>b</i> ]thiazole ( <b>6n</b> ) (Scheme 3).....                                                                   | S68 |
| 3-(1-Methyl-1 <i>H</i> -imidazol-2-yl)thiomorpholine ( <b>6o</b> ) (Scheme 3).....                                                                                         | S69 |
| 3-(Thiazol-5-yl)thiomorpholine ( <b>6p</b> ) (Scheme 3).....                                                                                                               | S70 |
| 3-(Thiazol-4-yl)thiomorpholine ( <b>6q</b> ) (Scheme 3).....                                                                                                               | S71 |
| 5-Methyl-3-(thiomorpholin-3-yl)isoxazole ( <b>6r</b> ) (Scheme 3).....                                                                                                     | S72 |
| 3-Phenyl-5-(thiomorpholin-3-yl)isoxazole ( <b>6s</b> ) (Scheme 3).....                                                                                                     | S73 |
| 3-(Quinolin-8-yl)thiomorpholine ( <b>6t</b> ) (Scheme 3).....                                                                                                              | S74 |
| 3-(Pyrazolo[1,5- <i>a</i> ]pyridin-7-yl)thiomorpholine ( <b>6u</b> ) (Scheme 3).....                                                                                       | S75 |
| <i>trans</i> -3-(Pyridin-2-yl)-2-(trimethylsilyl)thiomorpholine ( <b>7d</b> ) (Scheme 3).....                                                                              | S76 |
| 3-(Quinolin-3-yl)-1,4-thiazepane ( <b>8d</b> ) (Scheme 3).....                                                                                                             | S77 |
| 3-(2-Methyl-2 <i>H</i> -indazol-3-yl)-1,4-thiazepane ( <b>8e</b> ) (Scheme 3).....                                                                                         | S78 |
| 3-(1-Methyl-1 <i>H</i> -benzo[ <i>d</i> ]imidazol-2-yl)-1,4-thiazepane ( <b>8f</b> ) (Scheme 3).....                                                                       | S79 |
| 3-(4-Fluorophenyl)morpholine ( <b>12a</b> ).....                                                                                                                           | S80 |
| 3-(Morpholin-3-yl)benzotrile ( <b>12b</b> ).....                                                                                                                           | S81 |
| 3-(((Trimethylsilyl)methyl)thio)propanal ( <b>S8</b> ).....                                                                                                                | S82 |
| (((4-(4-Fluorophenyl)but-3-en-1-yl)thio)methyl)trimethylsilane, mixture of <i>E,Z</i> -isomers ( <b>13</b> ).....                                                          | S83 |
| <i>N</i> -((4-Fluorophenyl)(tetrahydrothiophen-3-yl)methyl)acetamide, diastereomers ( <b>14</b> ).....                                                                     | S84 |
| <i>N</i> -(Phenyl(3,4,6,10 <i>b</i> -tetrahydro-1 <i>H</i> -[1,4]thiazino[3,4- <i>a</i> ]isoindol-6-yl)methyl)acetamide, mixture of isomers ( <b>16</b> ) (Scheme 5b)..... | S86 |

## 2-(((Trimethylsilyl)methyl)thio)ethanamine (1a)

11-10-12-bhsieh.10.fid  
Sample fly-11-128  
group bode

$^1\text{H NMR}$  (400 MHz,  $\text{CDCl}_3$ )  $\delta$  2.85, 2.85, 2.84, 2.84, 2.83, 2.82, 2.82, 2.57, 2.57, 2.56, 2.56, 2.54, 2.54, 1.71, 1.71, 1.33, 0.05.

$^1\text{H NMR}$  (400 MHz, Chloroform-*d*)  $\delta$  2.84 (td,  $J = 6.2, 1.0$  Hz, 2 H), 2.56 (td,  $J = 6.2, 1.0$  Hz, 2 H), 1.71 (d,  $J = 1.0$  Hz, 2 H), 1.33 (br, 2 H), 0.05 (s, 9 H).

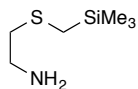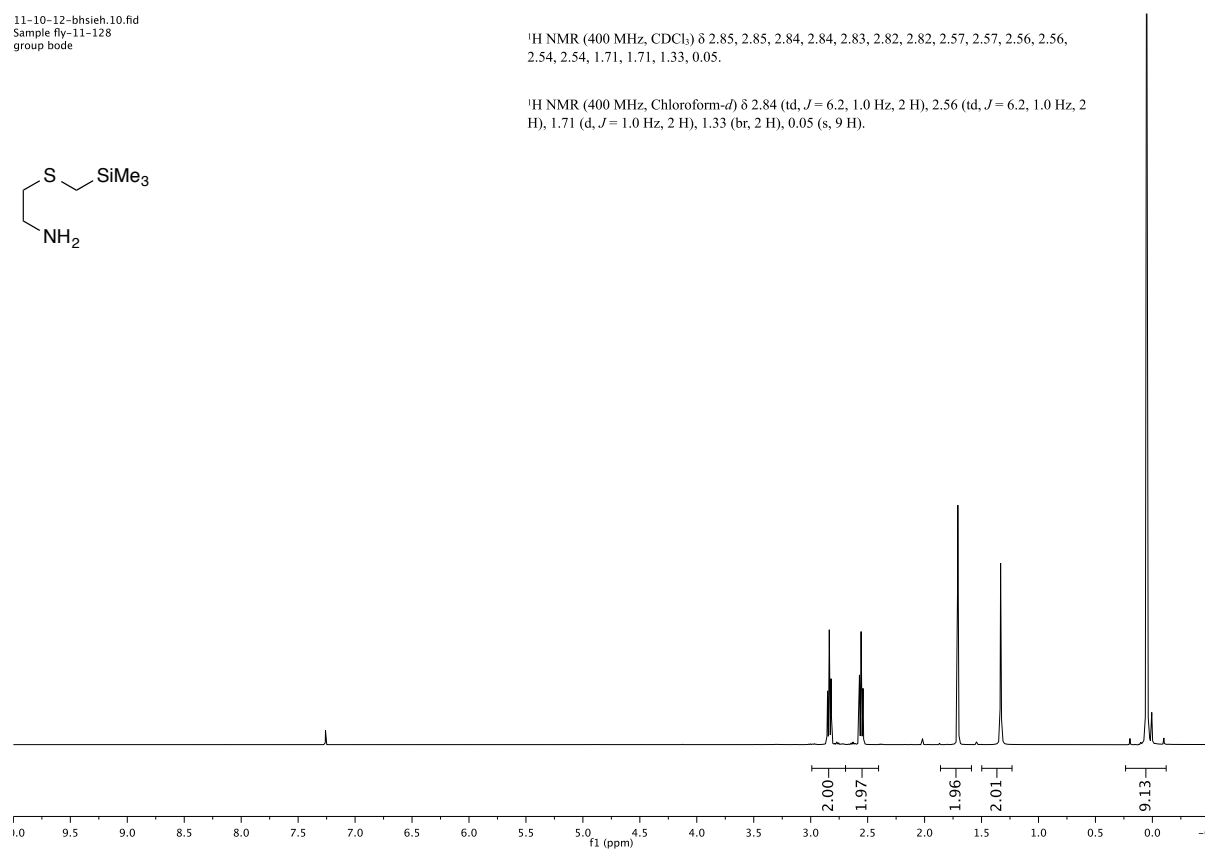

11-10-12-bhsieh.11.fid  
Sample fly-11-128  
group bode

40.3  
40.3  
17.9  
-1.7

$^{13}\text{C NMR}$  (101 MHz,  $\text{CDCl}_3$ )  $\delta$  40.3, 40.3, 17.9, -1.7.

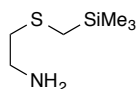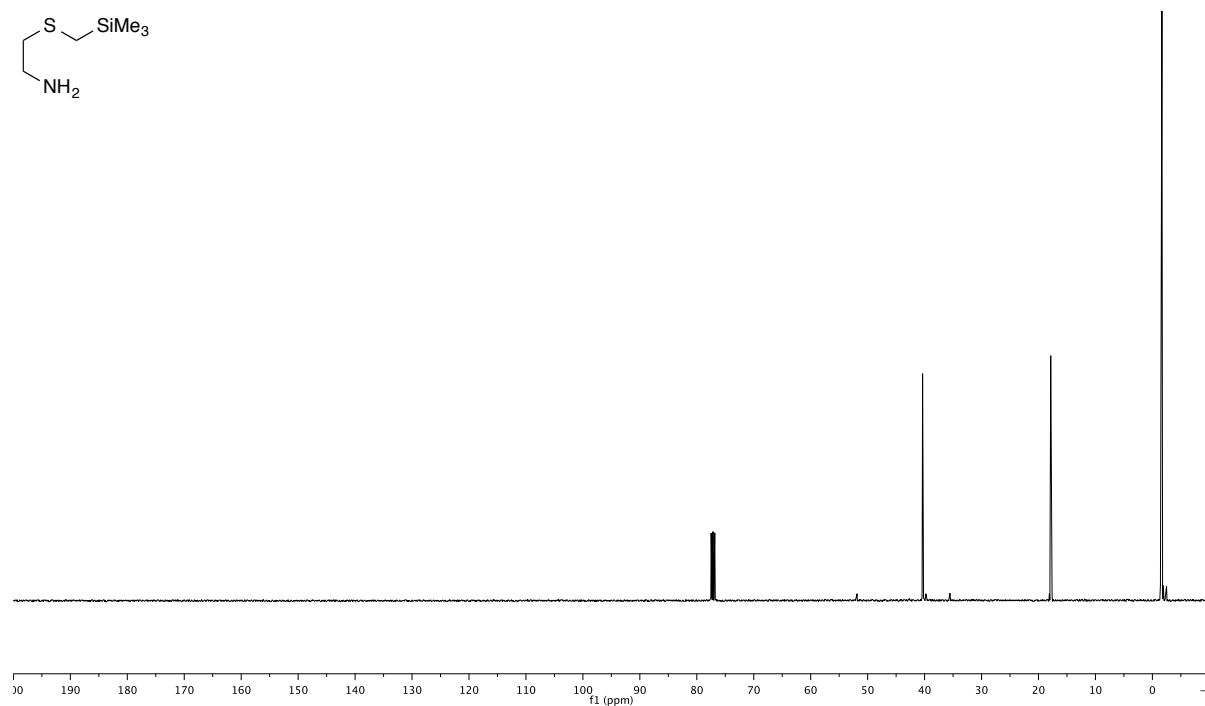

## 2-((Bis(trimethylsilyl)methyl)thio)ethanamine (1b)

23-25-07-bhsieh.10.fid  
Sample fly-08-057  
group bode  
PRO CDCl<sub>3</sub> /opt/v bhsieh 23

<sup>1</sup>H NMR (400 MHz, CDCl<sub>3</sub>) δ 2.83, 2.81, 2.81, 2.81, 2.81, 2.80, 2.58, 2.57, 2.56, 2.56, 2.55, 2.54, 1.57, 0.61, 0.61, 0.10.

<sup>1</sup>H NMR (400 MHz, Chloroform-*d*) δ 2.83–2.80 (m, 2 H), 2.56 (ddd, *J* = 7.1, 5.8, 1.1 Hz, 2 H), 1.57 (br, 1 H), 0.61 (d, *J* = 1.1 Hz, 2 H), 0.10 (s, 18 H).

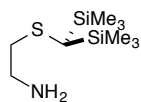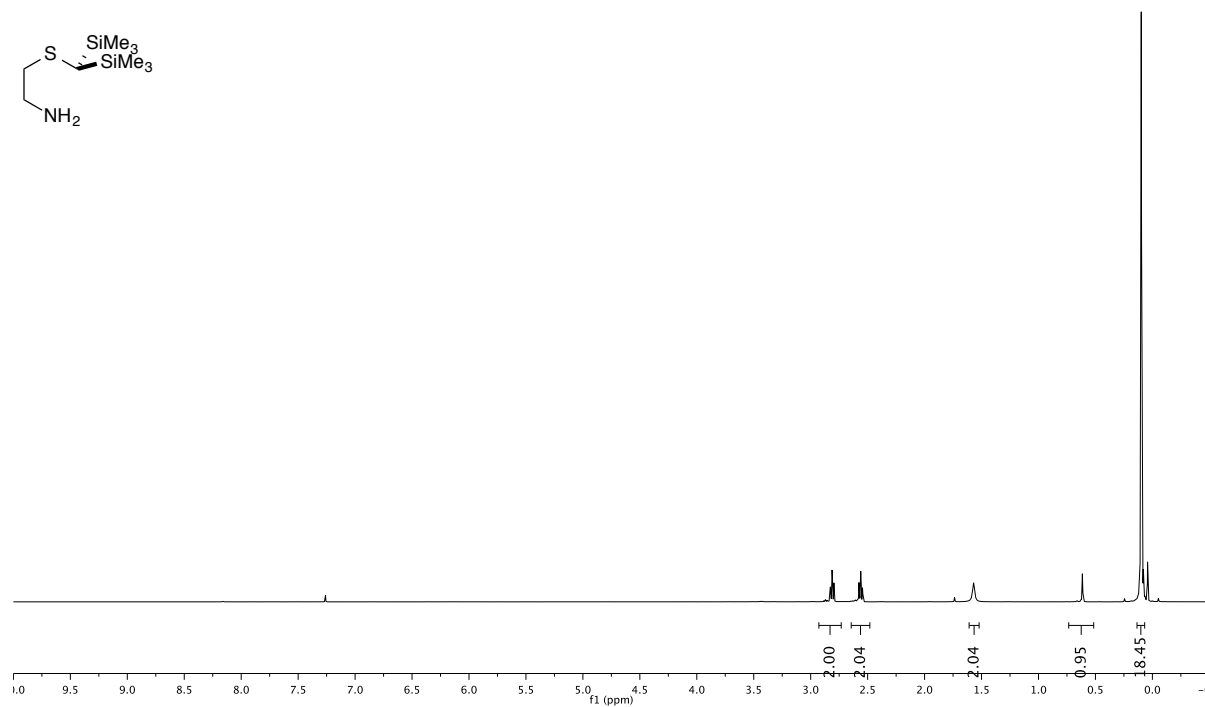

23-25-07-bhsieh.11.fid  
Sample fly-08-057  
group bode  
CAR CDCl<sub>3</sub> /opt/v bhsieh 23

<sup>13</sup>C NMR (101 MHz, CDCl<sub>3</sub>) δ 41.0, 40.9, 17.0, -0.1.

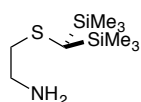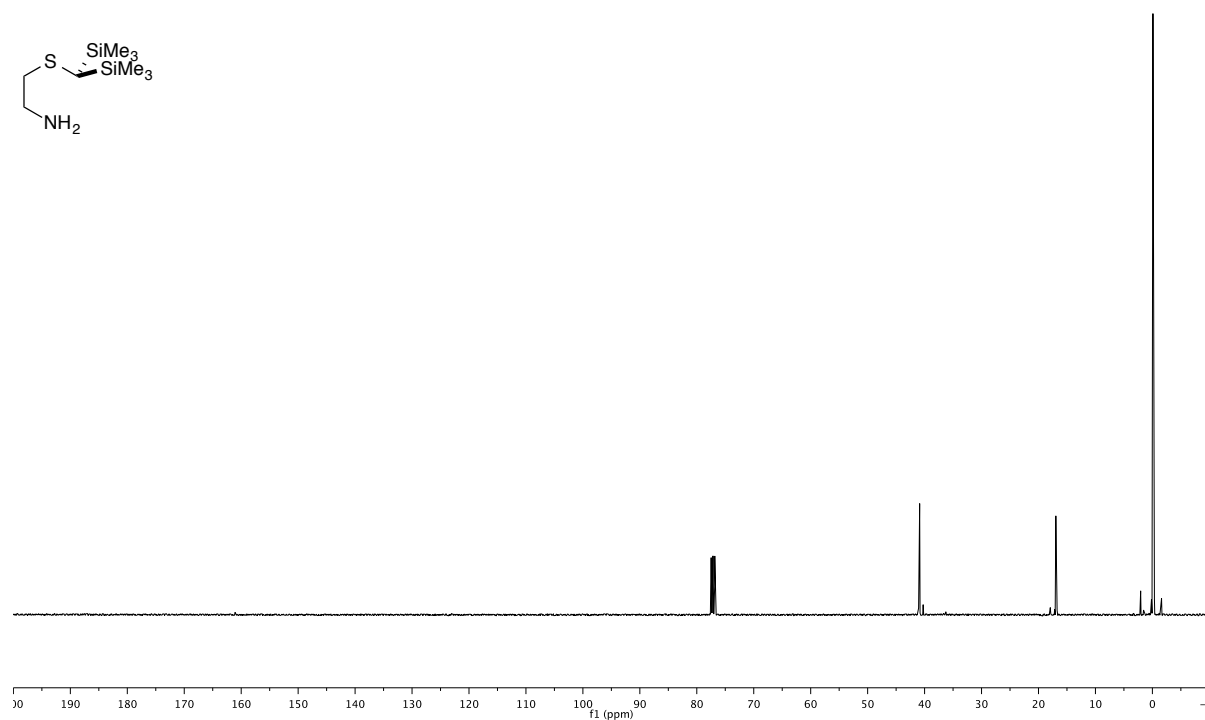

## 3-(((Trimethylsilyl)methyl)thio)propan-1-ol (S1)

43-25-07-bhsieh.10.fid  
Sample fly-07-148  
group bode

$^1\text{H NMR}$  (400 MHz,  $\text{CDCl}_3$ )  $\delta$  3.74, 3.74, 3.74, 3.73, 3.73, 3.72, 3.71, 3.71, 2.63, 2.62, 2.61, 2.60, 2.59, 2.59, 2.02, 1.88, 1.87, 1.87, 1.86, 1.86, 1.86, 1.85, 1.84, 1.84, 1.84, 1.83, 1.83, 1.82, 1.82, 1.81, 1.81, 1.81, 1.77, 0.07.

$^1\text{H NMR}$  (400 MHz, Chloroform-*d*)  $\delta$  3.74-3.71 (m, 2 H), 2.61 (td,  $J = 7.1, 1.2$  Hz, 2 H), 2.02 (br, 1 H), 1.88-1.81 (m, 2 H), 1.77 (s, 2 H), 0.07 (s, 9 H).

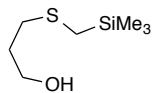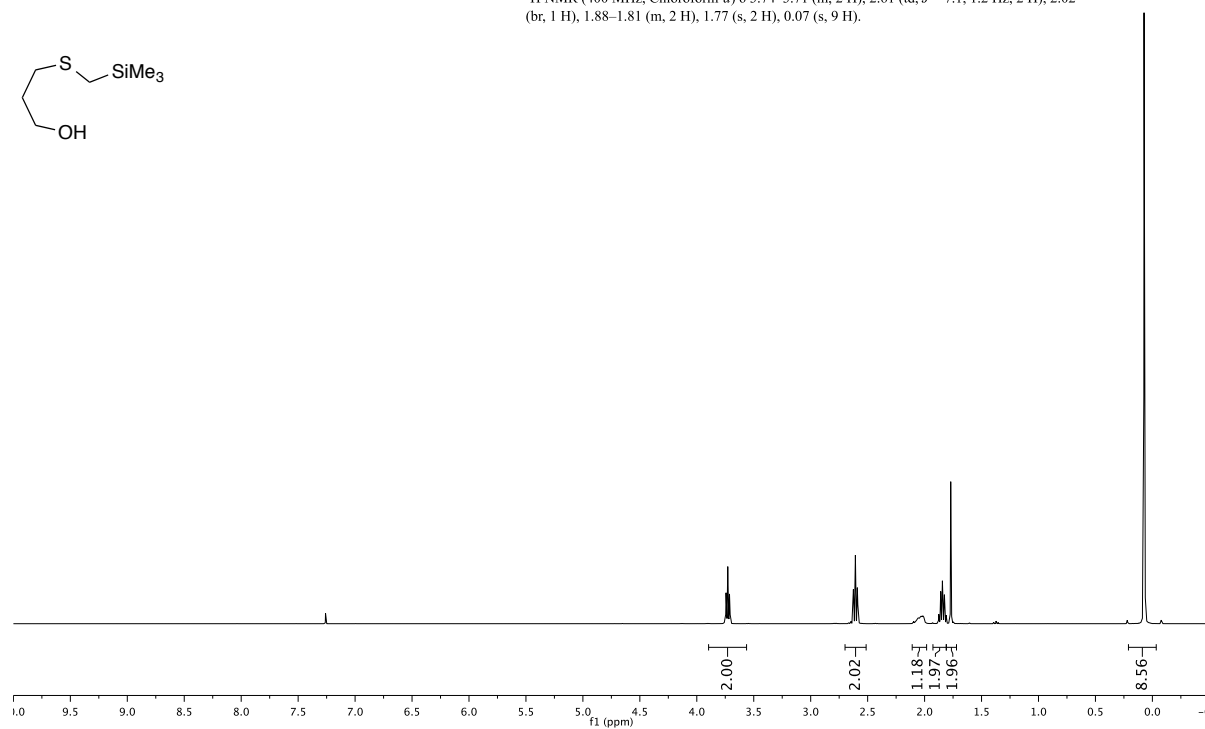

43-25-07-bhsieh.11.fid  
Sample fly-07-148  
group bode

62.1  
33.1  
31.2  
18.4  
-1.6

$^{13}\text{C NMR}$  (101 MHz,  $\text{CDCl}_3$ )  $\delta$  62.1, 33.1, 31.2, 18.4, -1.6.

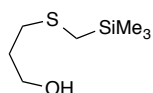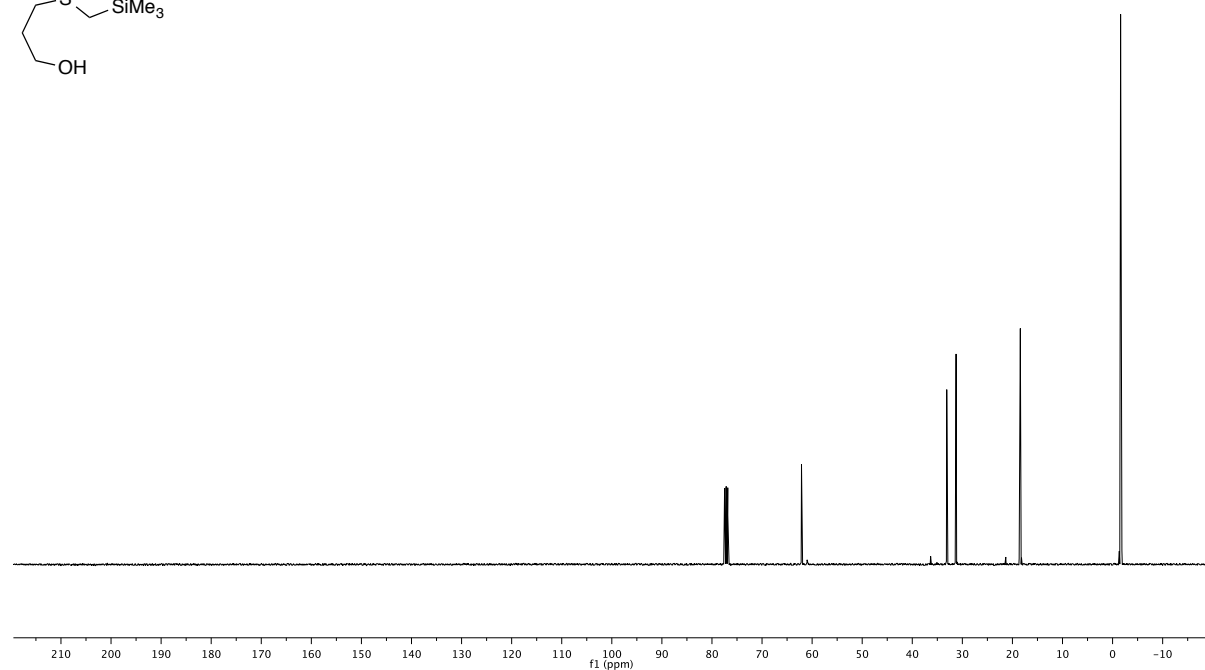

## 2-(3-(((Trimethylsilyl)methyl)thio)propyl)isoindoline-1,3-dione (S2)

44-25-07-bhsieh.10.fid  
Sample fly-07-153  
group bode

$^1\text{H NMR}$  (400 MHz,  $\text{CDCl}_3$ )  $\delta$  7.82, 7.81, 7.81, 7.80, 7.69, 7.69, 7.68, 7.67, 3.78, 3.76, 3.74, 2.55, 2.53, 2.51, 1.99, 1.97, 1.97, 1.95, 1.95, 1.94, 1.93, 1.93, 1.91, 1.74, 0.04.

$^1\text{H NMR}$  (400 MHz, Chloroform-*d*)  $\delta$  7.81 (dd,  $J = 5.5, 3.0$  Hz, 2 H), 7.68 (dd,  $J = 5.5, 3.0$  Hz, 2 H), 3.76 (dd,  $J = 7.6, 6.7$  Hz, 2 H), 2.55–2.51 (m, 2 H), 1.95 (qd,  $J = 7.4, 6.3$  Hz, 2 H), 1.74 (s, 2 H), 0.04 (s, 9 H).

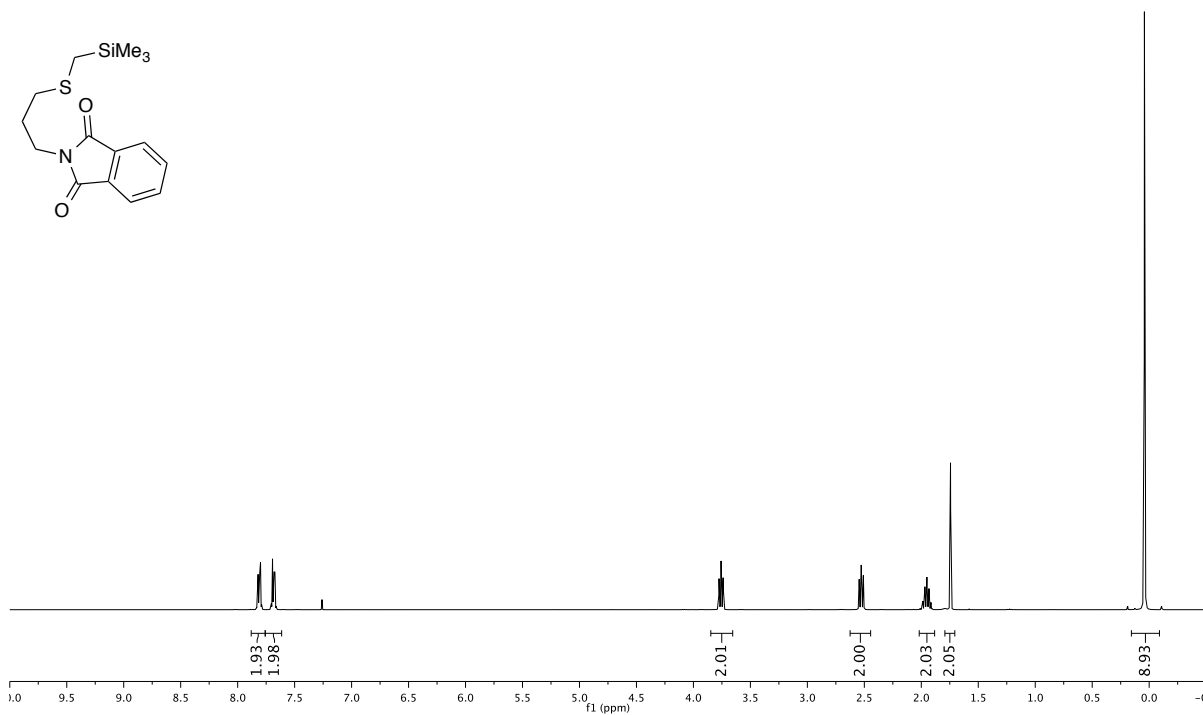

$^{13}\text{C NMR}$  (101 MHz,  $\text{CDCl}_3$ )  $\delta$  168.4, 134.0, 132.2, 123.3, 37.3, 33.4, 27.7, 18.2, -1.6.

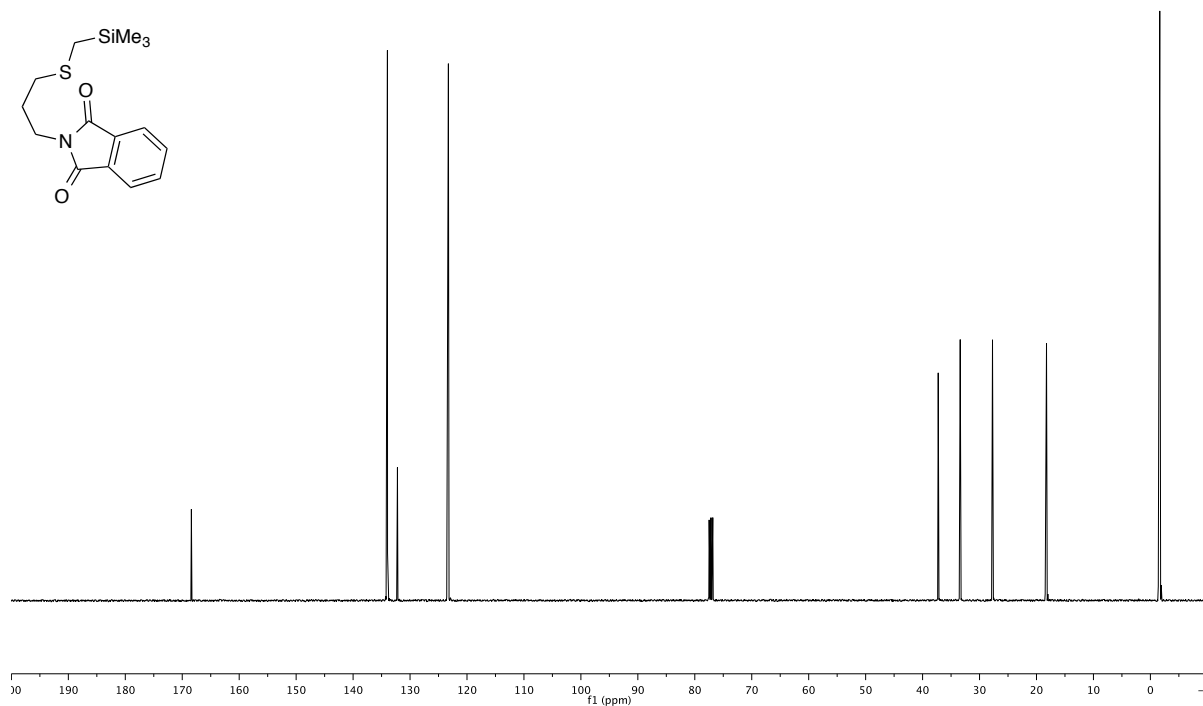



## 3-(((Trimethylsilyl)methyl)thio)propan-1-amine (1c)

45-25-07-bhsieh.10.fid  
Sample fly-08-078  
group bode

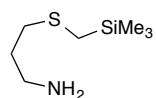

<sup>1</sup>H NMR (400 MHz, CDCl<sub>3</sub>) δ 2.80, 2.78, 2.76, 2.56, 2.55, 2.54, 2.54, 2.52, 2.52, 2.11, 1.77, 1.75, 1.75, 1.74, 1.74, 1.74, 1.72, 1.70, 0.06.

<sup>1</sup>H NMR (400 MHz, Chloroform-*d*) δ 2.78 (t, *J* = 6.9 Hz, 2 H), 2.54 (td, *J* = 7.2, 1.0 Hz, 2 H), 2.11 (br, 2 H), 1.77–1.70 (m, 4 H), 0.06 (s, 9 H).

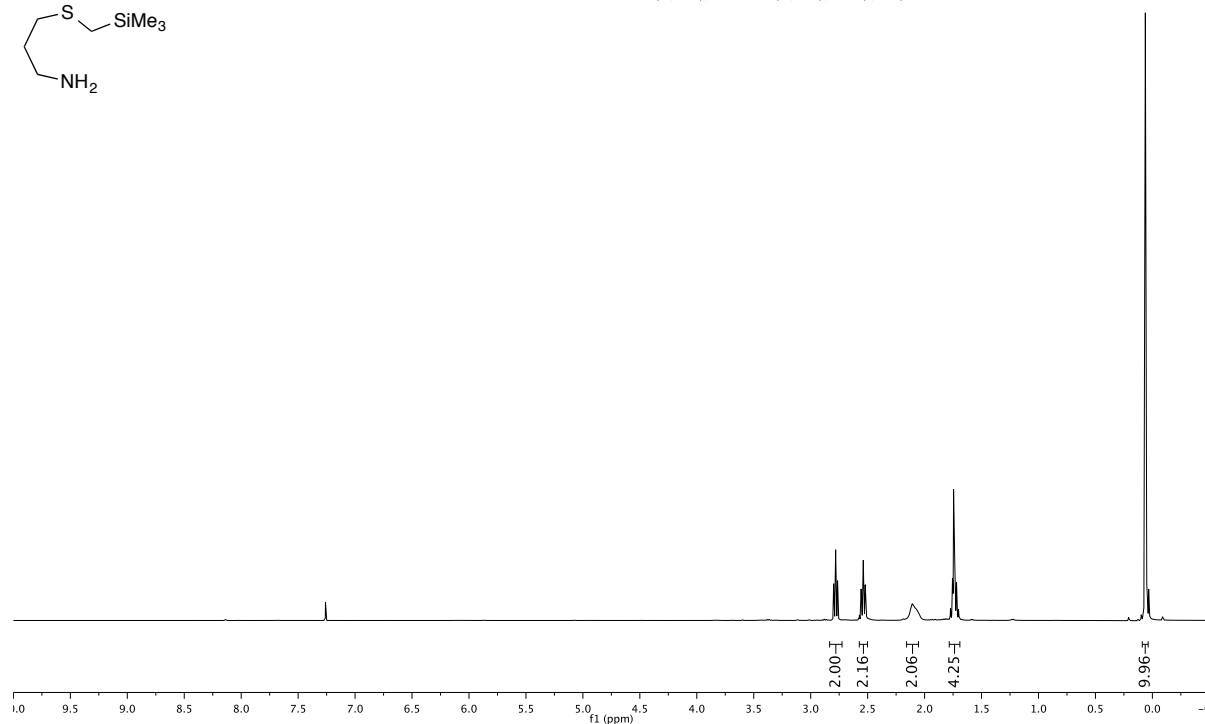

45-25-07-bhsieh.11.fid  
Sample fly-08-078  
group bode

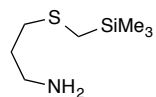

<sup>13</sup>C NMR (101 MHz, CDCl<sub>3</sub>) δ 41.0, 33.6, 32.3, 18.5, -1.6.

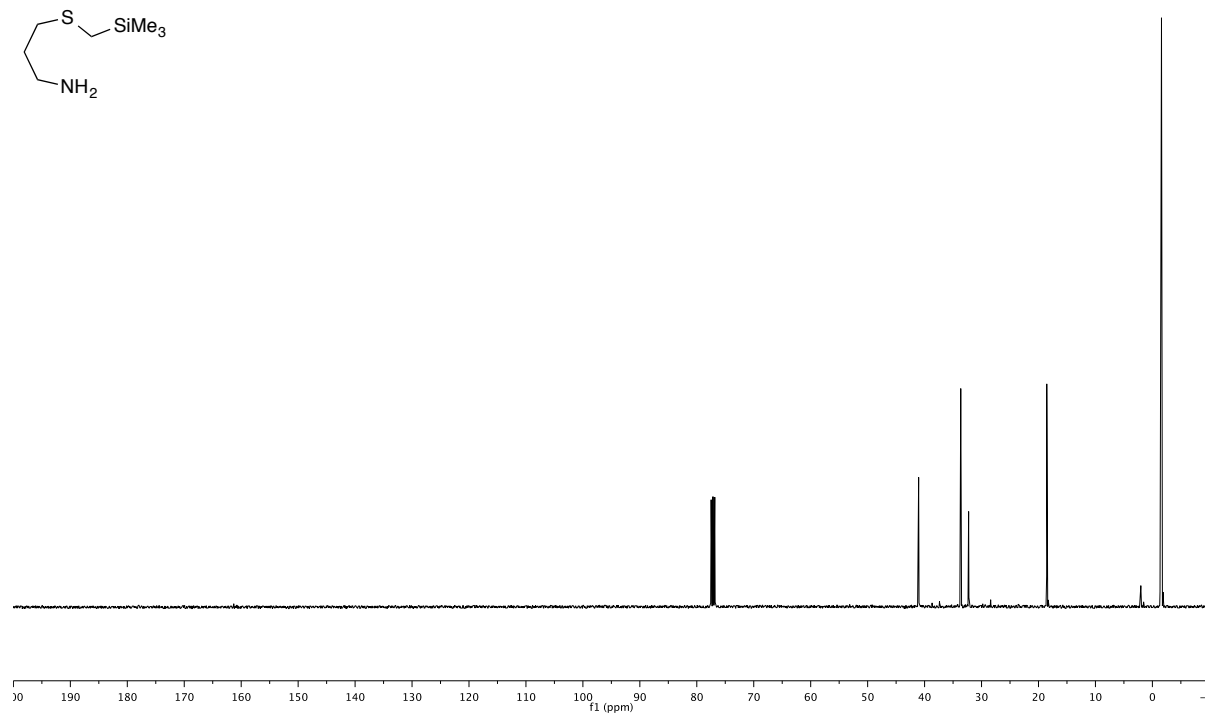

## 2-((Trimethylsilyl)methoxy)ethyl 4-methylbenzenesulfonate (S3)

35-26-07-bhsieh.10.fid  
Sample fly-12-041  
group bode  
PRO CDCl3 /opt/v bhsieh 35

$^1\text{H NMR}$  (400 MHz,  $\text{CDCl}_3$ )  $\delta$  7.79, 7.79, 7.78, 7.77, 7.33, 7.33, 7.33, 7.32, 7.31, 7.31, 4.13, 4.12, 4.12, 4.12, 4.11, 4.11, 4.10, 3.58, 3.57, 3.57, 3.56, 3.55, 3.05, 2.43, -0.02.

$^1\text{H NMR}$  (400 MHz, Chloroform-*d*)  $\delta$  7.78 (d,  $J = 8.3$  Hz, 2 H), 7.33–7.31 (m, 2 H), 4.13–4.10 (m, 2 H), 3.58–3.55 (m, 2 H), 3.05 (s, 2 H), 2.43 (s, 3 H), -0.02 (s, 9 H).

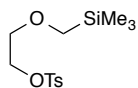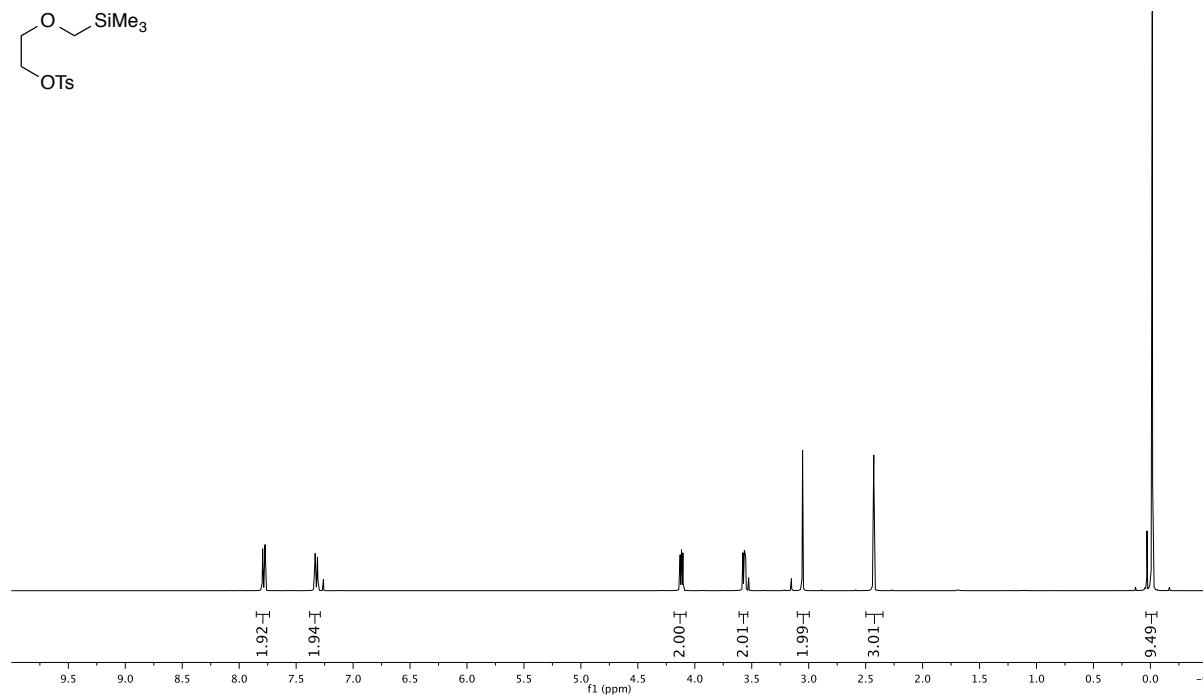

35-26-07-bhsieh.11.fid  
Sample fly-12-041  
group bode  
CAR CDCl3 /opt/v bhsieh 35

144.8, 133.2, 129.9, 128.0, 72.3, 69.3, 65.7, 21.7, -3.1

$^{13}\text{C NMR}$  (101 MHz,  $\text{CDCl}_3$ )  $\delta$  144.8, 133.2, 129.9, 128.0, 72.3, 69.3, 65.7, 21.7, -3.1.

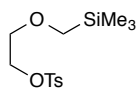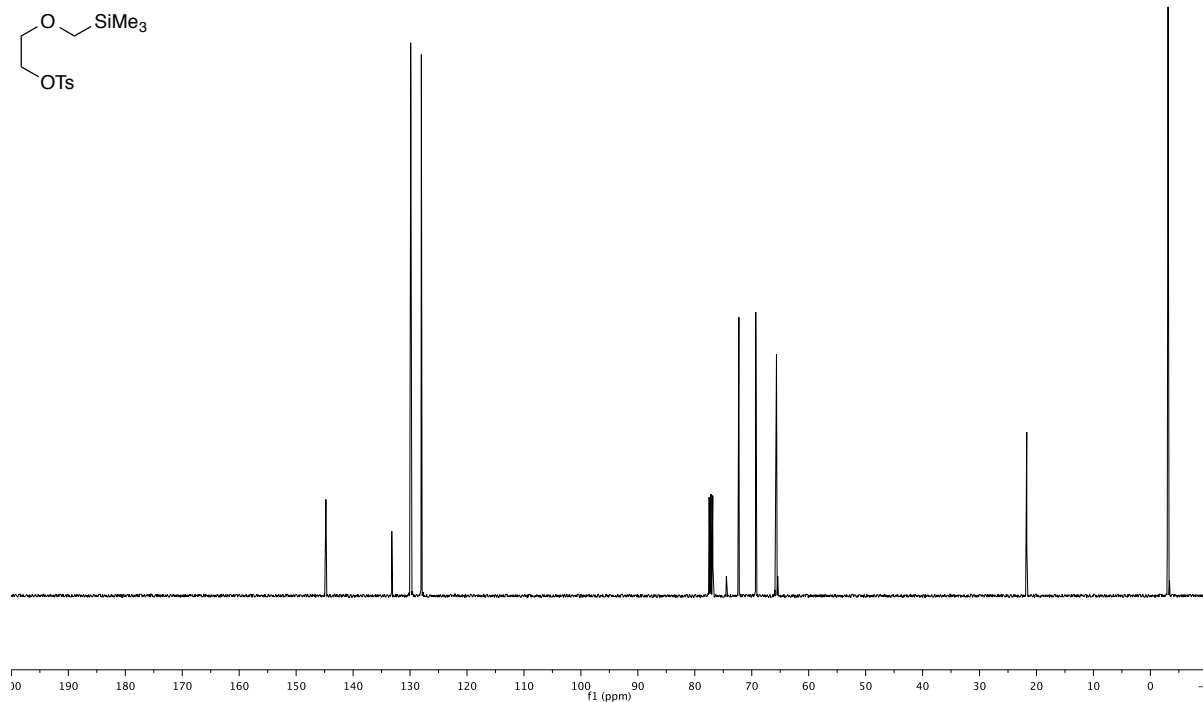

## 2-(2-((Trimethylsilyl)methoxy)ethyl)isoindoline-1,3-dione (S4)

51-26-07-bhsieh.10.fid  
Sample fly-12-042  
group bode

$^1\text{H NMR}$  (400 MHz,  $\text{CDCl}_3$ )  $\delta$  7.83, 7.83, 7.82, 7.82, 7.82, 7.81, 7.81, 7.81, 7.70, 7.69, 7.69, 7.69, 7.68, 7.68, 7.67, 3.88, 3.88, 3.87, 3.86, 3.85, 3.85, 3.63, 3.63, 3.62, 3.62, 3.61, 3.60, 3.12, -0.07, -0.07.

$^1\text{H NMR}$  (400 MHz, Chloroform-*d*)  $\delta$  7.82 (ddd,  $J = 5.6, 3.1, 1.3$  Hz, 2 H), 7.68 (ddd,  $J = 5.6, 3.1, 1.3$  Hz, 2 H), 3.87 (td,  $J = 5.8, 1.3$  Hz, 2 H), 3.63–3.60 (m, 2 H), 3.12 (s, 2 H), -0.07 (s, 9 H).

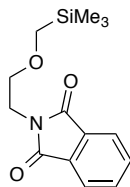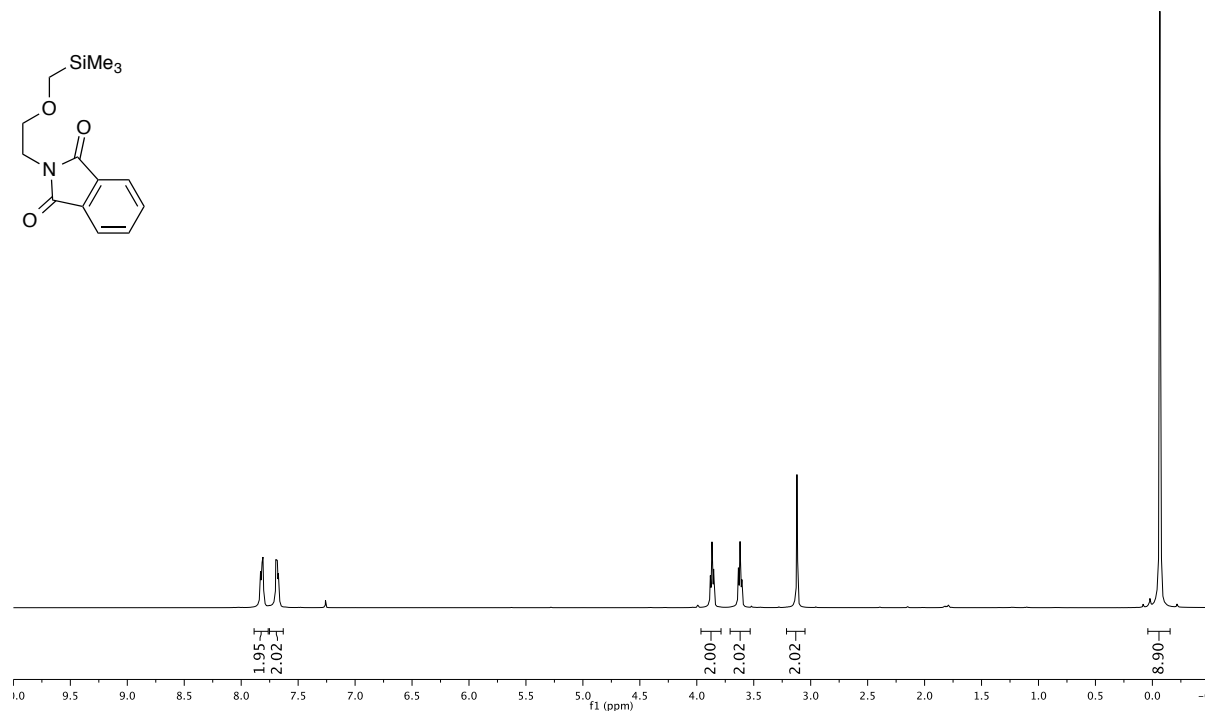

51-26-07-bhsieh.11.fid  
Sample fly-12-042  
group bode

168.3, 133.9, 132.3, 123.2, 71.6, 64.9, 37.1, -3.1

$^{13}\text{C NMR}$  (101 MHz,  $\text{CDCl}_3$ )  $\delta$  168.3, 133.9, 132.3, 123.2, 71.6, 64.9, 37.1, -3.1.

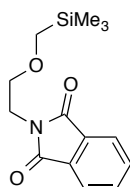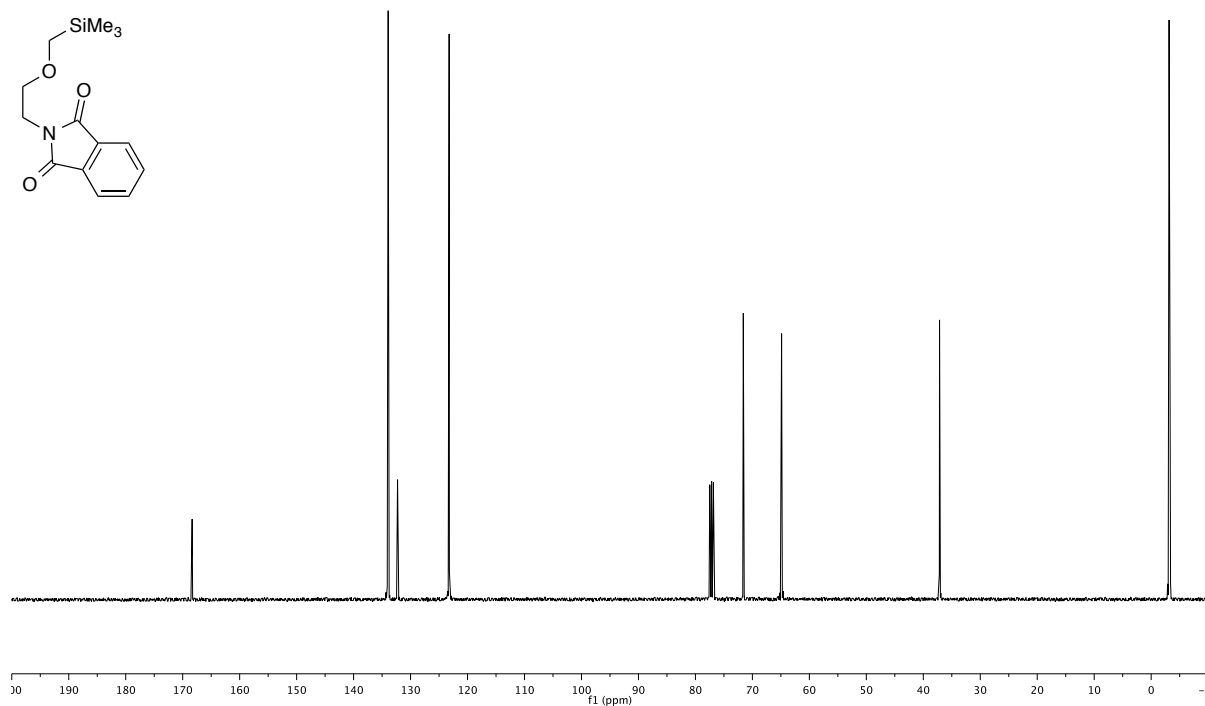

## 2-((Trimethylsilyl)methoxy)ethan-1-amine (11)

42-25-07-bhsieh.10.fid  
Sample fly-12-043  
group bode

$^1\text{H NMR}$  (400 MHz,  $\text{CDCl}_3$ )  $\delta$  3.42, 3.41, 3.40, 3.11, 2.82, 2.81, 2.79, 1.41, 0.04.

$^1\text{H NMR}$  (400 MHz, Chloroform-*d*)  $\delta$  3.41 (t,  $J = 5.1$  Hz, 2 H), 3.11 (s, 2 H), 2.81 (t,  $J = 5.1$  Hz, 2 H), 1.41 (br, 2 H), 0.04 (s, 9 H).

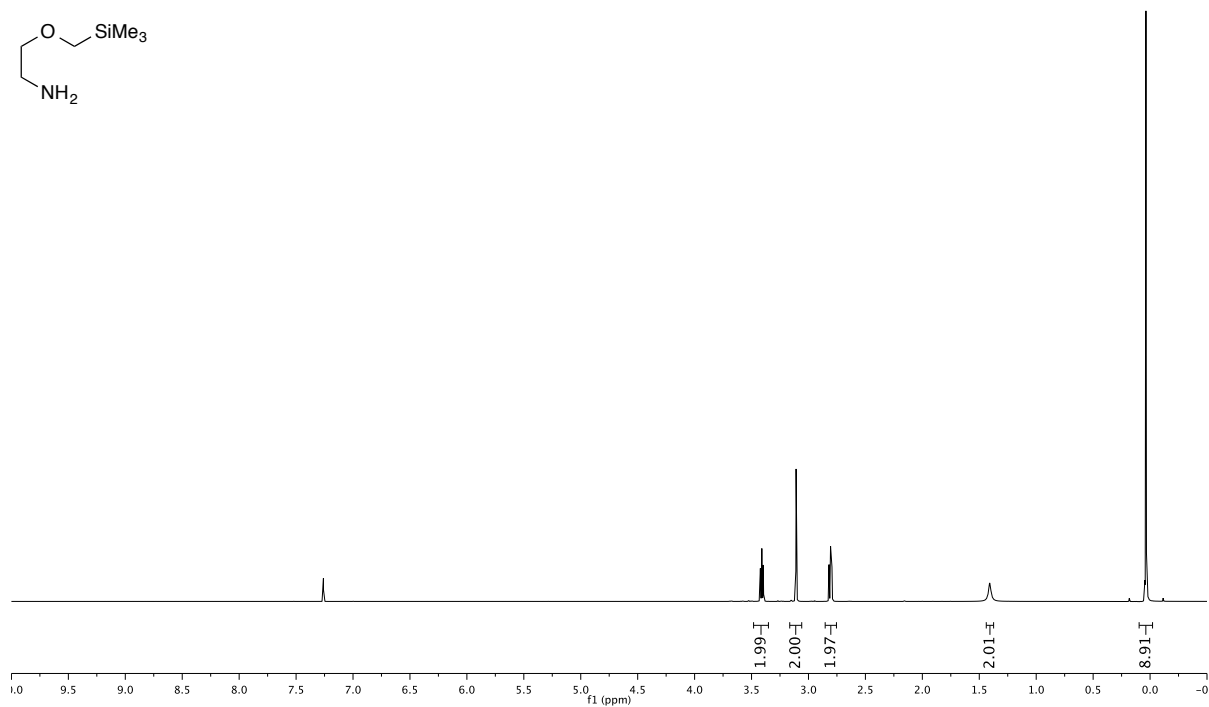

42-25-07-bhsieh.11.fid  
Sample fly-12-043  
group bode

77.5, 65.2, 41.9, -2.9

$^{13}\text{C NMR}$  (101 MHz,  $\text{CDCl}_3$ )  $\delta$  77.5, 65.2, 41.9, -2.9.

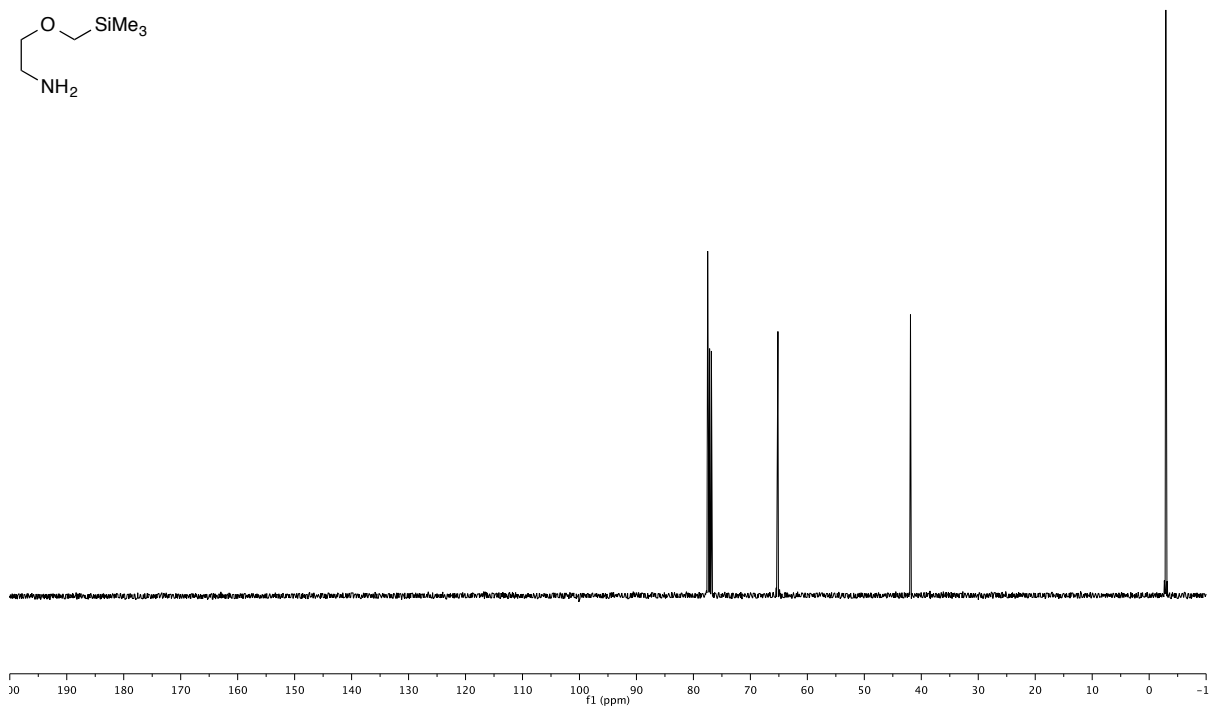

## 3-(4-Fluorophenyl)thiomorpholine (6a) (Table S1, entry 4)

13-11-12-bhsieh.10.fid  
Sample fly-11-130-CC-ab  
group bode

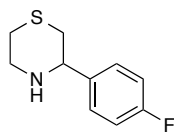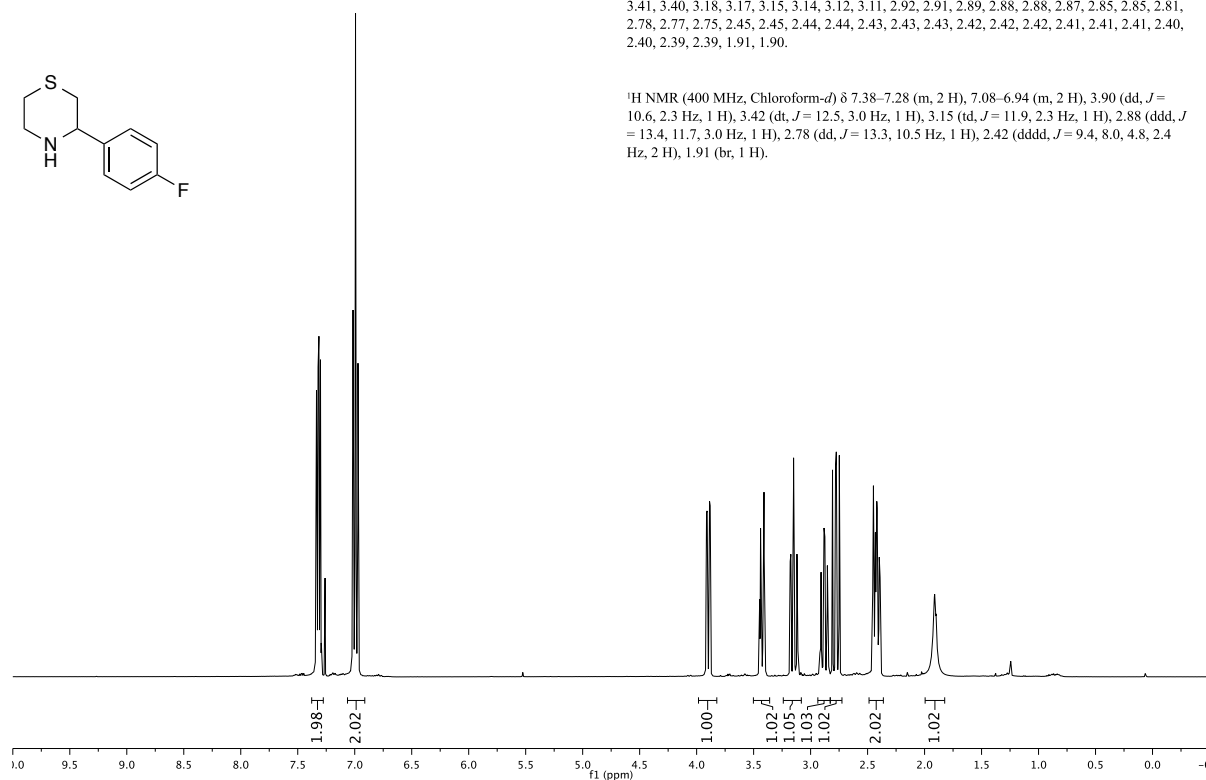

13-11-12-bhsieh.11.fid  
Sample fly-11-130-CC-ab  
group bode

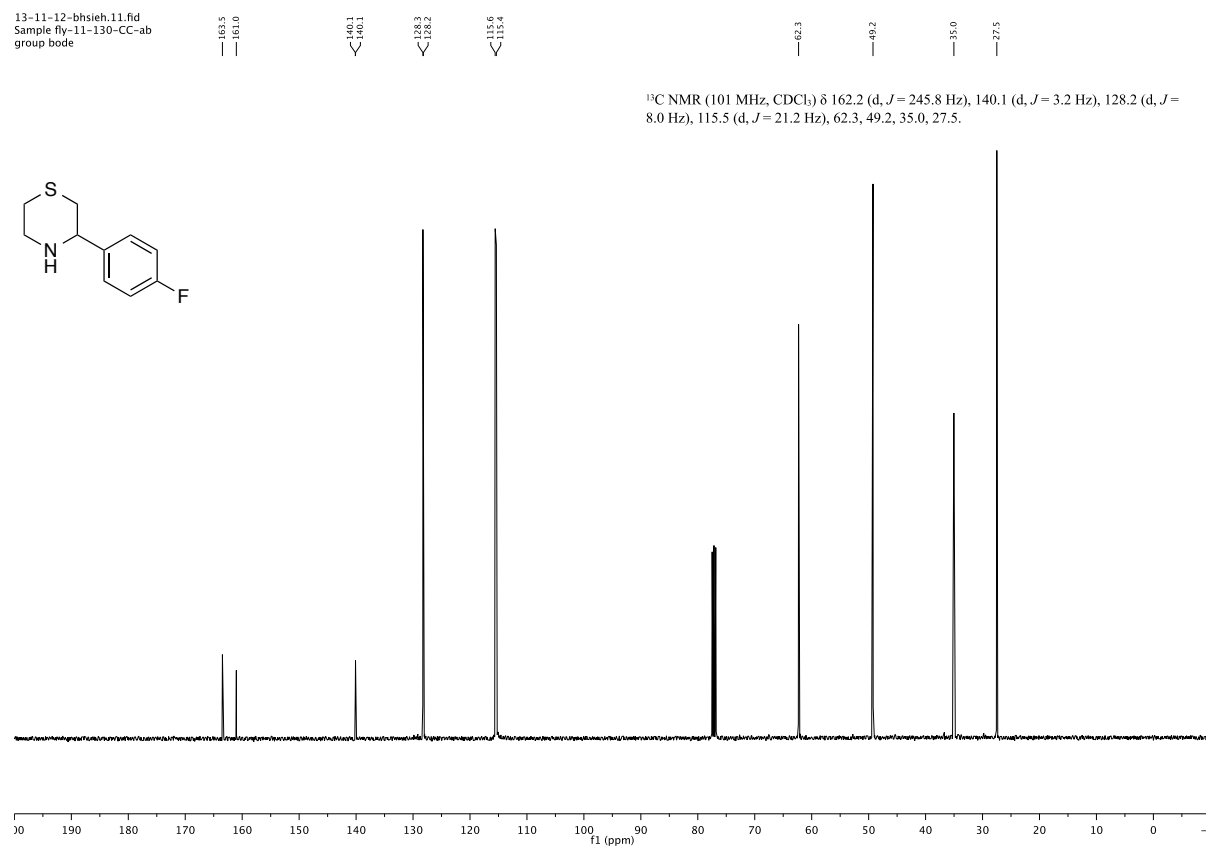

## 3-(4-(Trifluoromethyl)phenyl)thiomorpholine (6b) (Scheme 2)

28-24-12-bhsieh.10.fid  
Sample fly-08-136-CC-6-pCF3  
group bode  
PRO CDCl3 /opt/v bhsieh 28

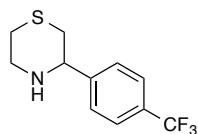

$^1\text{H NMR}$  (400 MHz,  $\text{CDCl}_3$ )  $\delta$  7.59, 7.59, 7.58, 7.57, 7.49, 7.47, 7.47, 7.47, 4.01, 4.00, 3.98, 3.98, 3.47, 3.47, 3.46, 3.45, 3.45, 3.44, 3.43, 3.42, 3.42, 3.20, 3.19, 3.17, 3.16, 3.14, 3.13, 2.93, 2.92, 2.92, 2.90, 2.90, 2.89, 2.89, 2.87, 2.86, 2.81, 2.79, 2.78, 2.76, 2.75, 2.48, 2.48, 2.47, 2.46, 2.45, 2.45, 2.45, 2.44, 2.44, 2.44, 2.42, 2.42, 2.41, 2.41, 1.82.

$^1\text{H NMR}$  (400 MHz, Chloroform-*d*)  $\delta$  7.66–7.54 (m, 1 H), 7.54–7.43 (m, 1 H), 3.99 (dd,  $J$  = 10.5, 2.2 Hz, 1 H), 3.57–3.33 (m, 1 H), 3.16 (td,  $J$  = 11.9, 2.3 Hz, 1 H), 2.89 (ddd,  $J$  = 12.9, 11.7, 3.0 Hz, 1 H), 2.78 (dd,  $J$  = 13.3, 10.6 Hz, 1 H), 2.45 (ddt,  $J$  = 11.9, 10.9, 2.4 Hz, 1 H), 1.82 (br, 1 H).

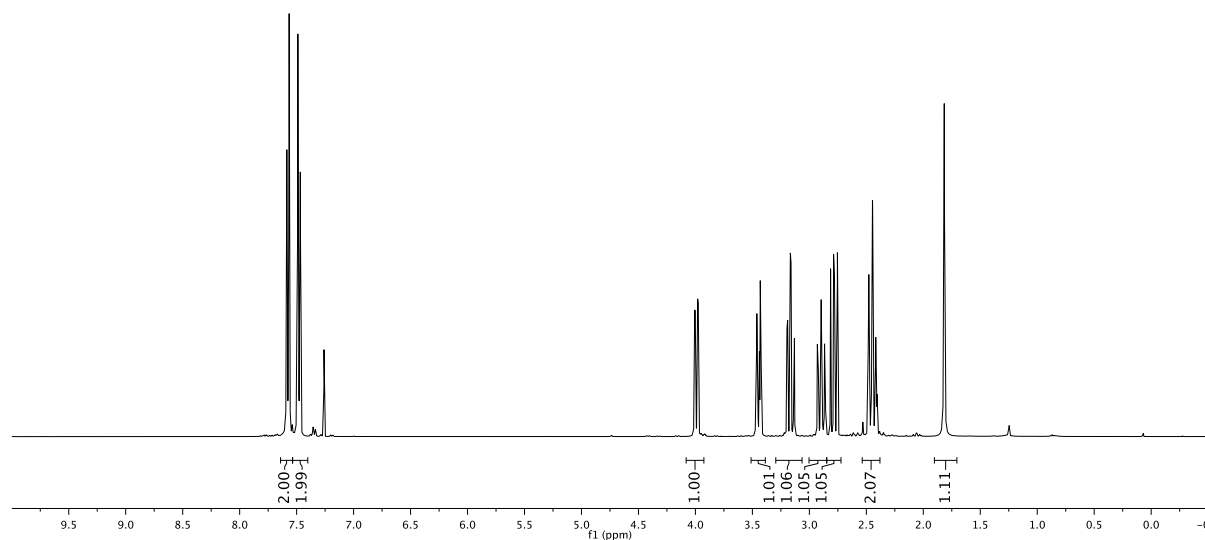

28-24-12-bhsieh.11.fid  
Sample fly-08-136-CC-6-pCF3  
group bode  
CAR CDCl3 /opt/v bhsieh 28

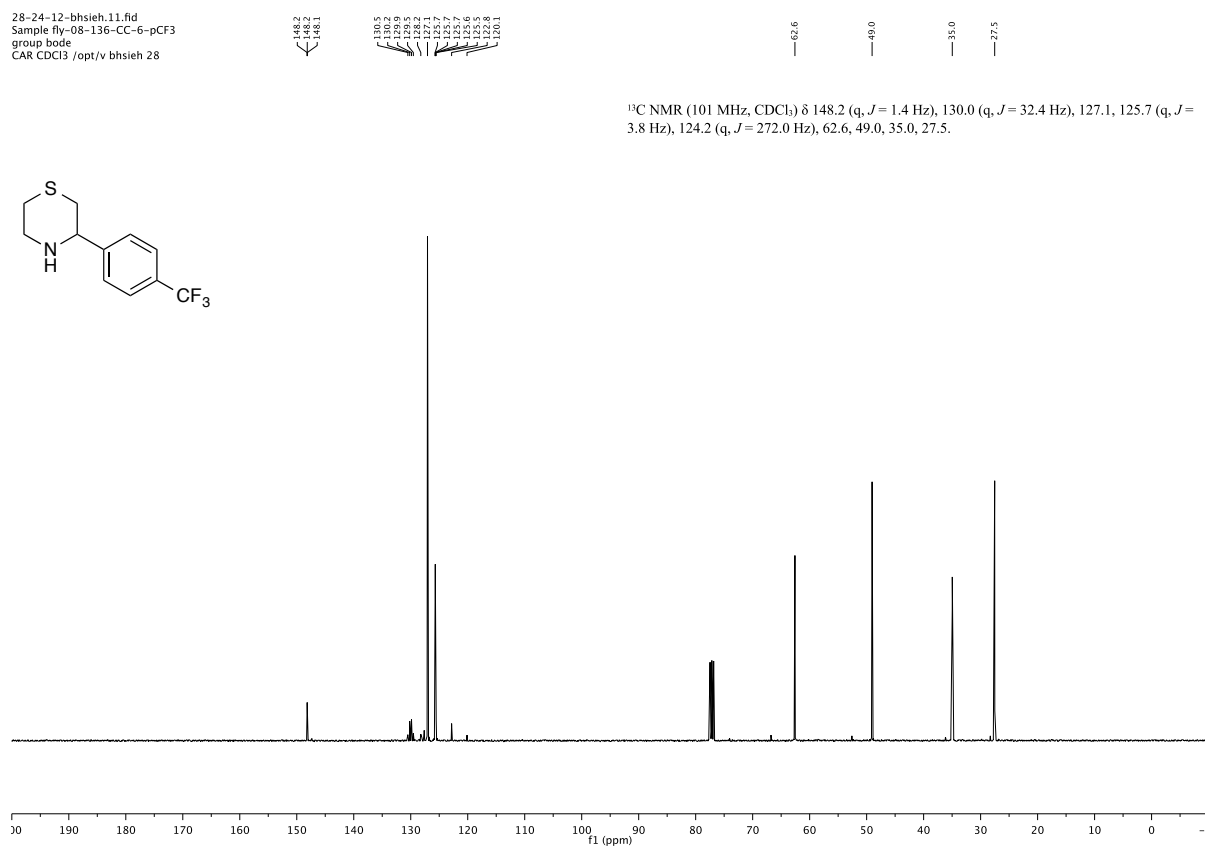

$^{13}\text{C NMR}$  (101 MHz,  $\text{CDCl}_3$ )  $\delta$  148.2 (q,  $J$  = 1.4 Hz), 130.0 (q,  $J$  = 32.4 Hz), 127.1, 125.7 (q,  $J$  = 3.8 Hz), 124.2 (q,  $J$  = 272.0 Hz), 62.6, 49.0, 35.0, 27.5.

## 3-(4-Nitrophenyl)thiomorpholine (6c) (Scheme 2)

25-24-12-bhsieh.10.fid  
 Sample fly-08-092-CC-6-pNO2  
 group bode  
 PRO CDCl3 /opt/v bhsieh 25

$^1\text{H NMR}$  (400 MHz,  $\text{CDCl}_3$ )  $\delta$  8.14, 8.14, 8.13, 8.12, 8.11, 8.11, 7.53, 7.53, 7.52, 7.51, 7.51, 7.50, 4.04, 4.03, 4.01, 4.01, 3.45, 3.45, 3.44, 3.42, 3.42, 3.41, 3.17, 3.16, 3.14, 3.13, 3.11, 3.10, 2.89, 2.89, 2.87, 2.86, 2.86, 2.85, 2.83, 2.82, 2.76, 2.73, 2.73, 2.70, 2.46, 2.46, 2.45, 2.44, 2.44, 2.43, 2.43, 2.42, 2.42, 2.42, 2.42, 2.41, 2.40, 2.39, 2.39, 1.84.

$^1\text{H NMR}$  (400 MHz, Chloroform-*d*)  $\delta$  8.23–8.02 (m, 2 H), 7.69–7.43 (m, 2 H), 4.02 (dd,  $J$  = 10.4, 2.3 Hz, 1 H), 3.43 (dt,  $J$  = 11.8, 3.0 Hz, 1 H), 3.14 (td,  $J$  = 11.9, 2.3 Hz, 1 H), 2.86 (ddd,  $J$  = 13.3, 11.7, 3.0 Hz, 1 H), 2.73 (dd,  $J$  = 13.2, 10.5 Hz, 1 H), 2.52–2.32 (m, 2 H), 1.84 (br, 1 H).

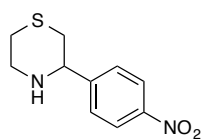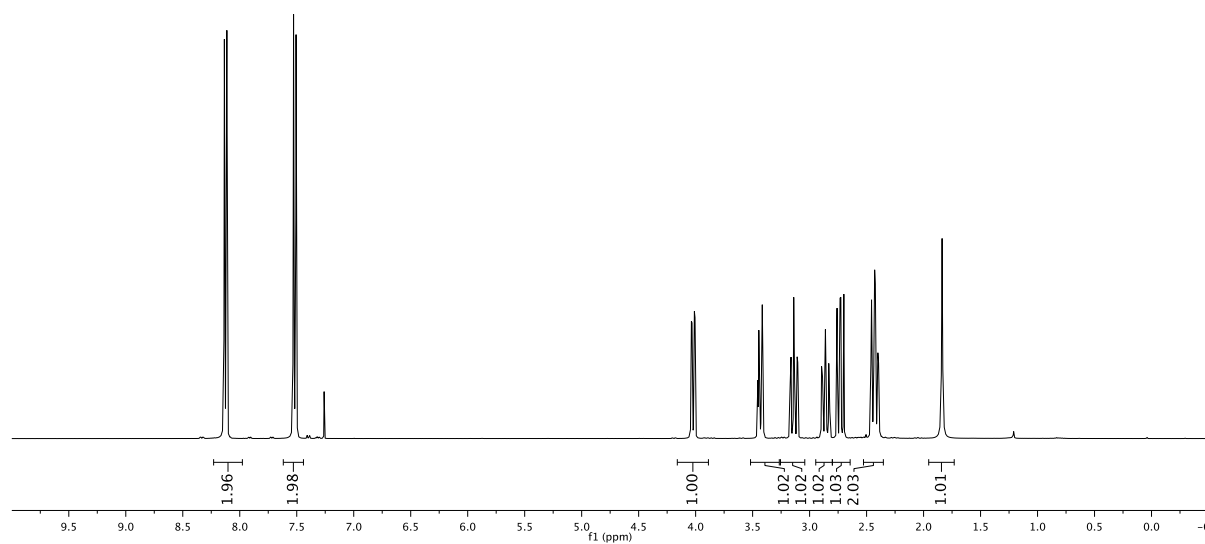

25-24-12-bhsieh.11.fid  
 Sample fly-08-092-CC-6-pNO2  
 group bode  
 CAR CDCl3 /opt/v bhsieh 25

151.4  
 147.4  
 127.5  
 123.9

62.2  
 48.7  
 34.8  
 27.4

$^{13}\text{C NMR}$  (101 MHz,  $\text{CDCl}_3$ )  $\delta$  151.4, 147.4, 127.5, 123.9, 62.2, 48.7, 34.8, 27.4.

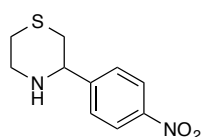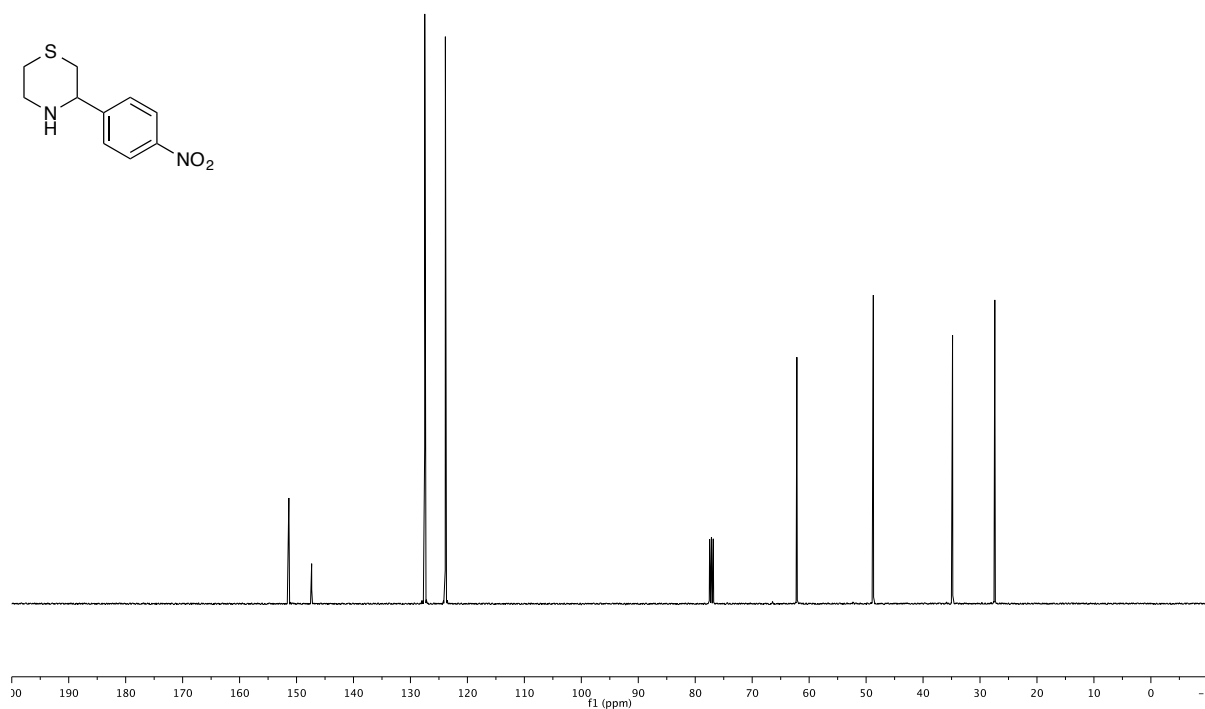

## Methyl 4-(thiomorpholin-3-yl)benzoate (6d) (Scheme 2)

22-24-12-bhsieh.10.fid  
Sample fly-08-040-CC-6-pCO2Me  
group bode  
PRO CDCl3 /opt/v bhsieh 22

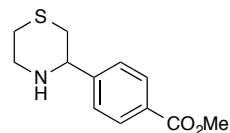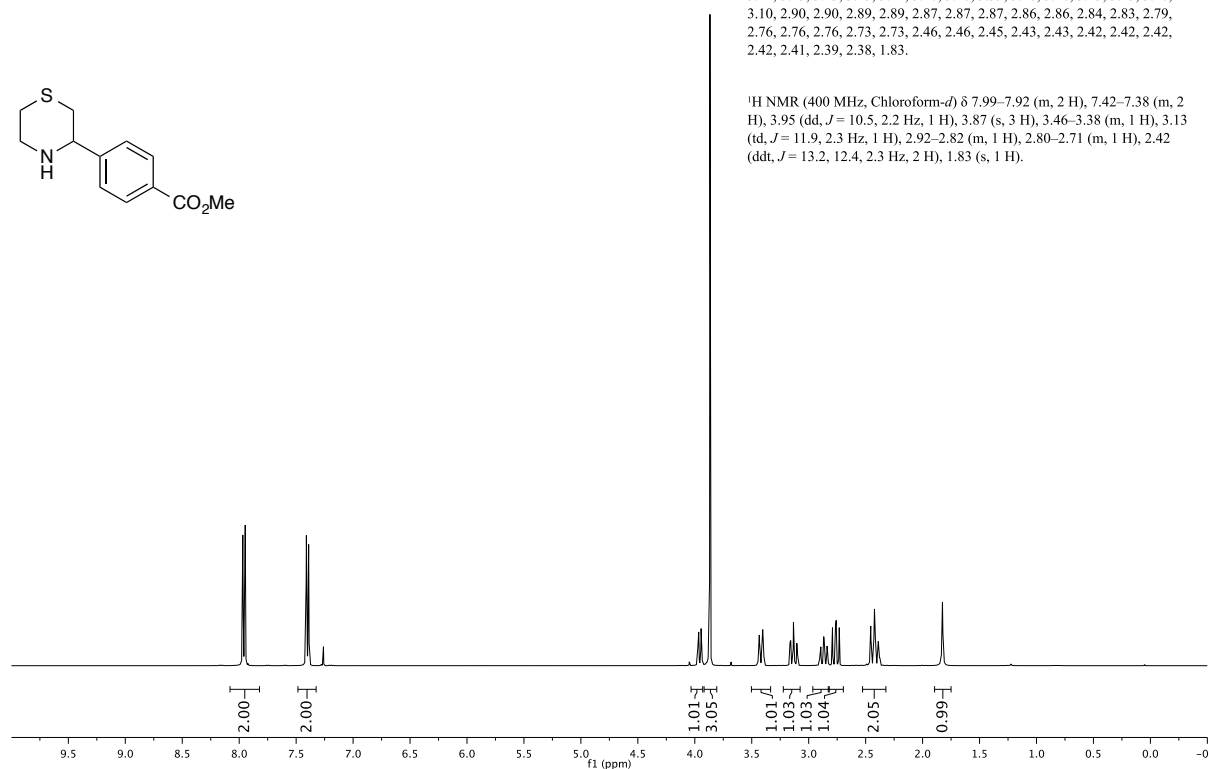

22-24-12-bhsieh.11.fid  
Sample fly-08-040-CC-6-pCO2Me  
group bode  
CAR CDCl3 /opt/v bhsieh 22

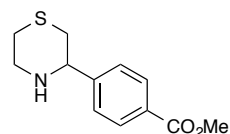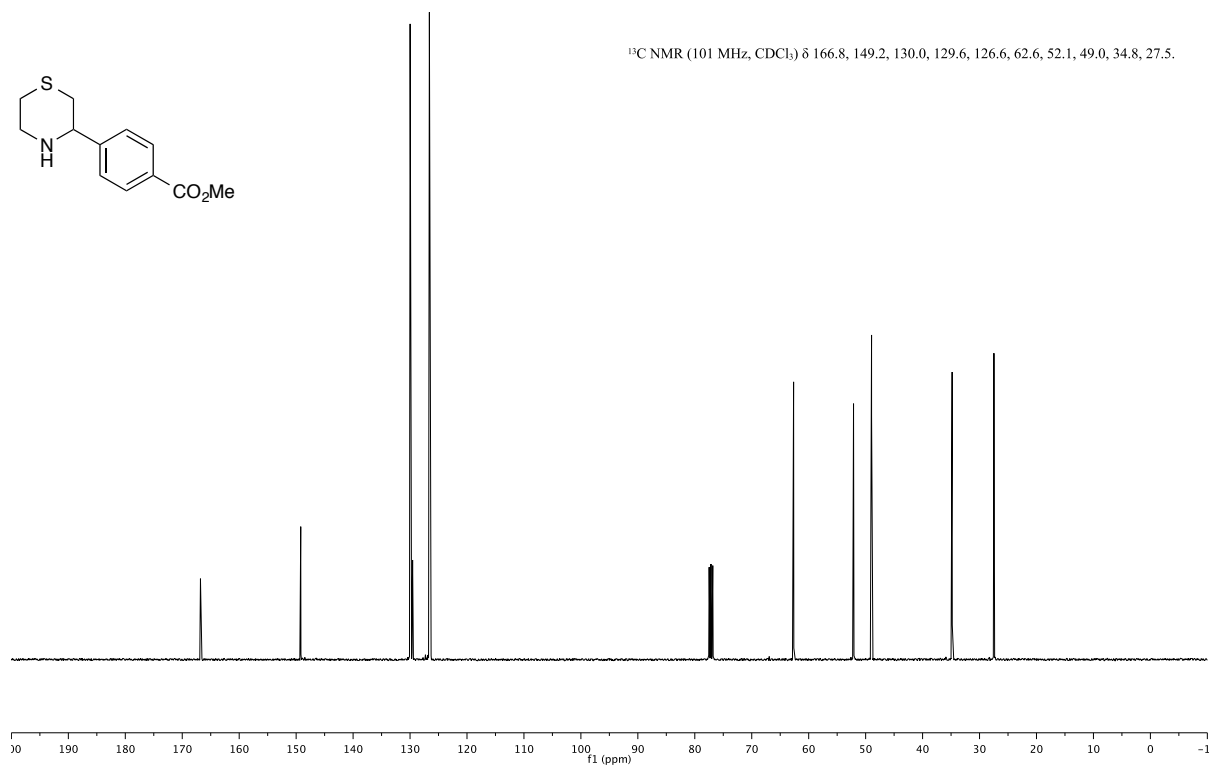



## 3-(4-Methoxyphenyl)thiomorpholine (6e) (Scheme 2)

21-23-12-bhsieh.10.fid  
 Sample fly-08-064-CC-6-pOMe  
 group bode  
 PRO CDCl<sub>3</sub> /opt/v bhsieh 21

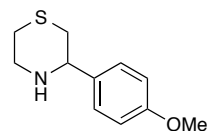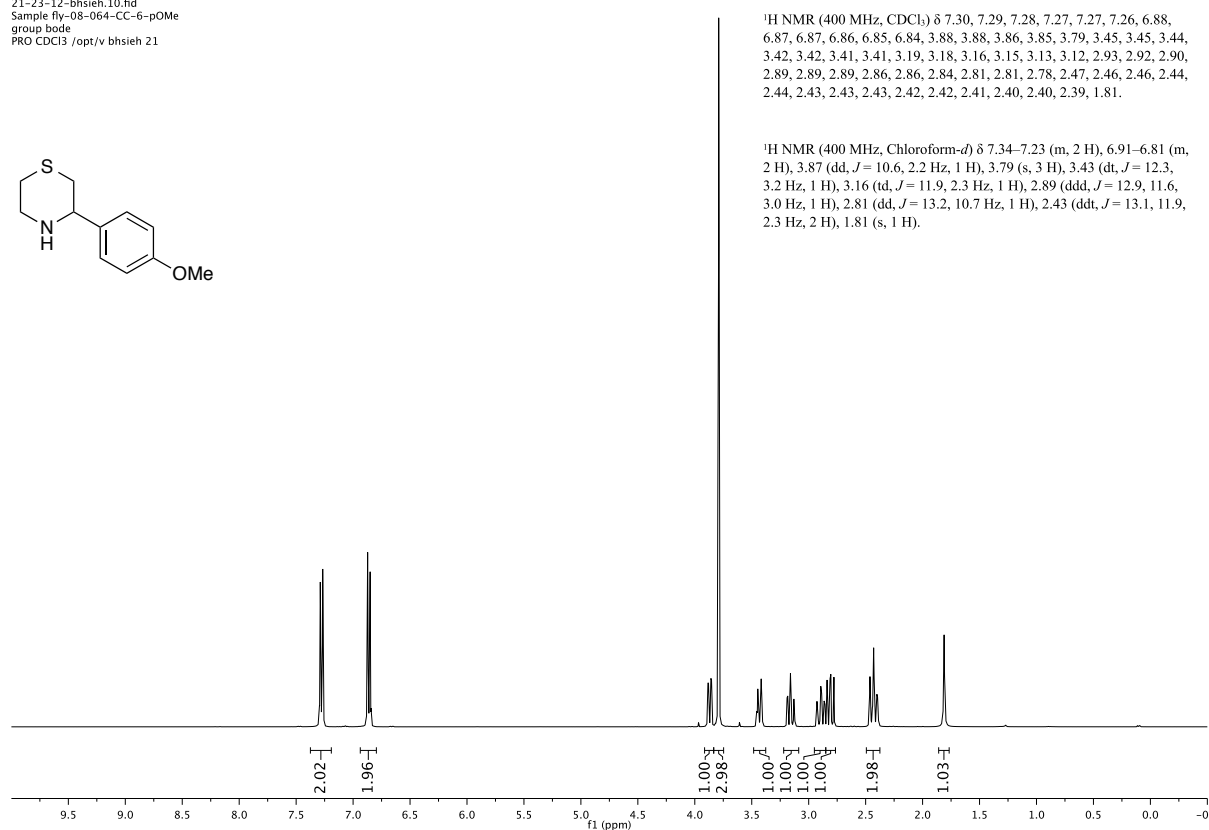

21-23-12-bhsieh.11.fid  
 Sample fly-08-064-CC-6-pOMe  
 group bode  
 CAR CDCl<sub>3</sub> /opt/v bhsieh 21

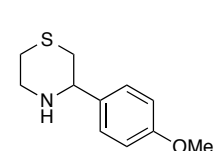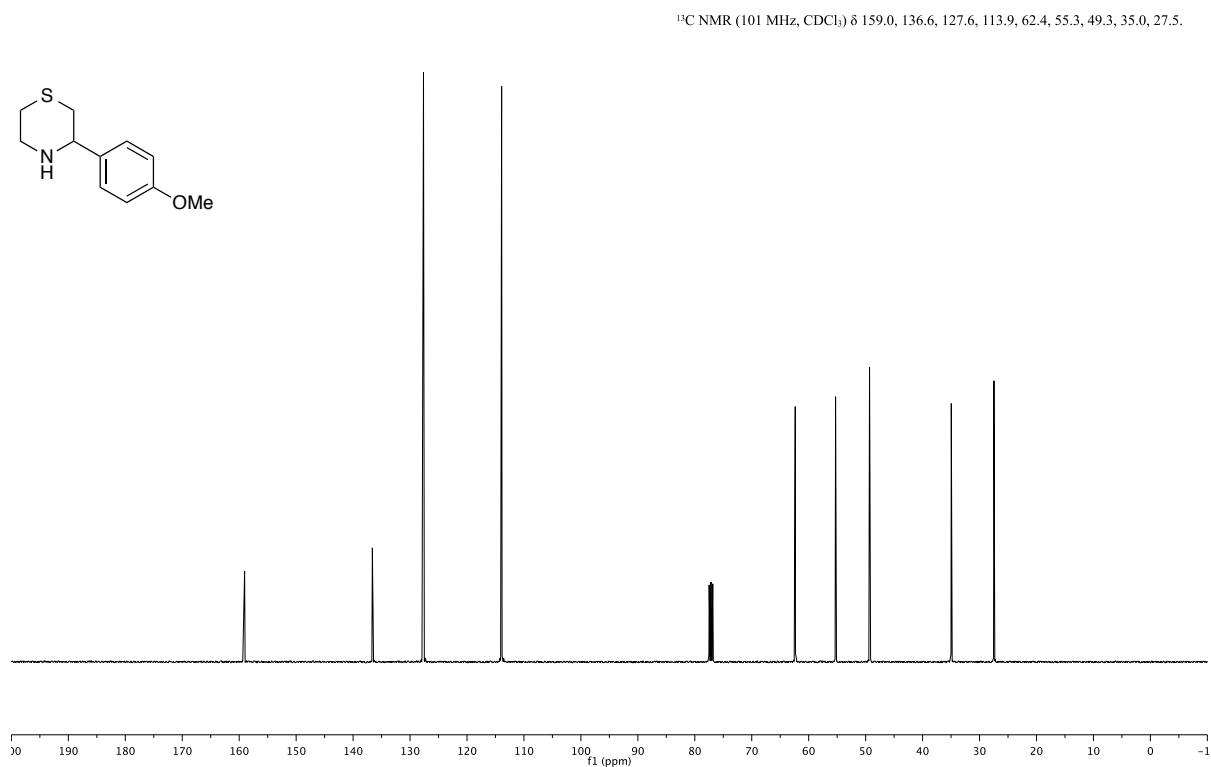

***N*-(4-(Thiomorpholin-3-yl)phenyl)acetamide (6f) (Scheme 2)**

52-20-01-bhsieh.10.fid  
Sample fly-11-144-CC-6-NHAc  
group bode

<sup>1</sup>H NMR (400 MHz, CDCl<sub>3</sub>) δ 7.67, 7.45, 7.44, 7.43, 7.42, 7.42, 7.41, 7.28, 7.28, 7.27, 7.25, 3.88, 3.88, 3.86, 3.85, 3.45, 3.44, 3.43, 3.42, 3.41, 3.40, 3.17, 3.17, 3.14, 3.14, 3.11, 3.11, 2.91, 2.90, 2.88, 2.88, 2.87, 2.87, 2.85, 2.84, 2.80, 2.78, 2.77, 2.74, 2.44, 2.44, 2.43, 2.43, 2.42, 2.42, 2.42, 2.41, 2.41, 2.40, 2.40, 2.39, 2.39, 2.38, 2.13, 1.94.

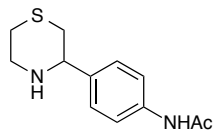

<sup>1</sup>H NMR (400 MHz, Chloroform-*d*) δ 7.67 (br, 1 H), 7.46–7.40 (m, 2 H), 7.30–7.24 (m, 2 H), 3.87 (dd, *J* = 10.6, 2.2 Hz, 1 H), 3.42 (dt, *J* = 12.1, 3.0 Hz, 1 H), 3.14 (td, *J* = 11.9, 2.3 Hz, 1 H), 2.87 (ddd, *J* = 13.4, 11.7, 3.0 Hz, 1 H), 2.77 (dd, *J* = 13.4, 10.6 Hz, 1 H), 2.46–2.36 (m, 2 H), 2.13 (s, 3 H), 1.94 (br, 1 H).

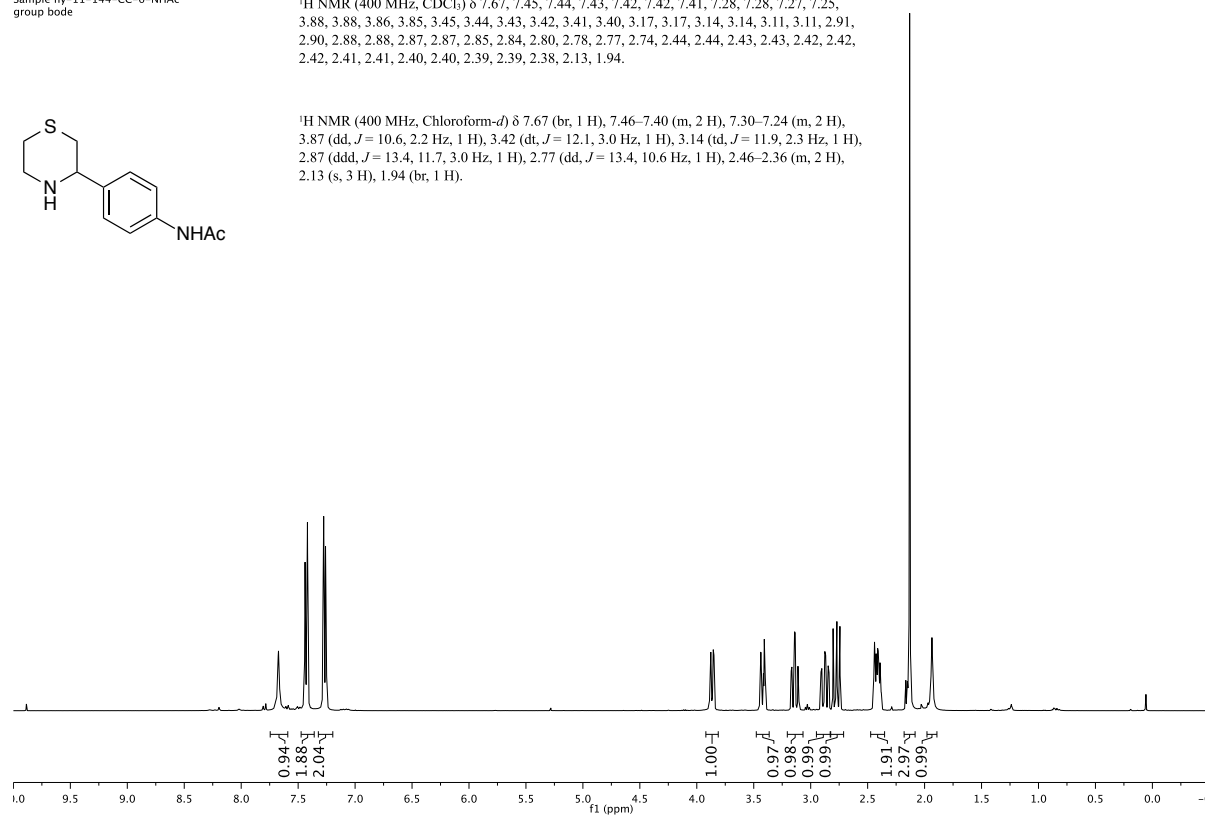

52-20-01-bhsieh.11.fid  
Sample fly-11-144-CC-6-NHAc  
group bode

168.7, 140.2, 137.4, 127.2, 120.3, 62.5, 49.2, 34.9, 27.5, 24.6

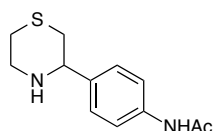

<sup>13</sup>C NMR (101 MHz, CDCl<sub>3</sub>) δ 168.7, 140.2, 137.4, 127.2, 120.3, 62.5, 49.2, 34.9, 27.5, 24.6.

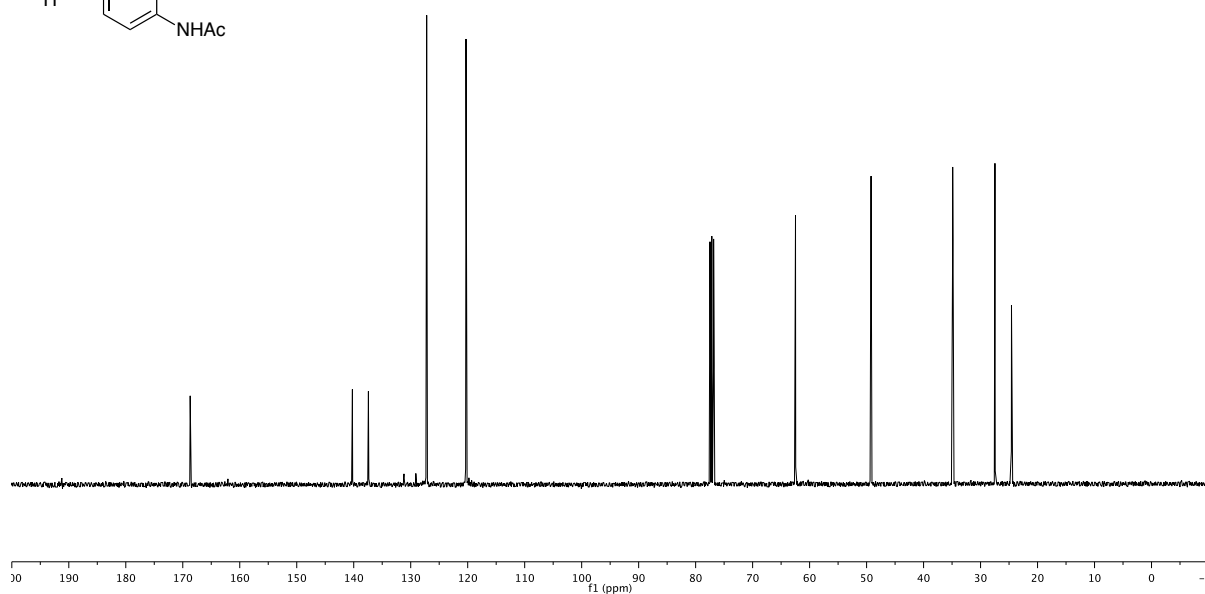

## 3-Mesitylthiomorpholine (6g) (Scheme 2)

26-24-12-bhsieh.10.fid  
 Sample fly-08-095-CC-6-Mes  
 group bode  
 PRO CDCl<sub>3</sub> /opt/v bhsieh 26

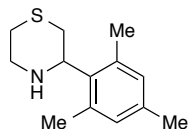

<sup>1</sup>H NMR (400 MHz, CDCl<sub>3</sub>) δ 6.84, 4.43, 4.42, 4.40, 4.40, 3.49, 3.48, 3.47, 3.46, 3.45, 3.44, 3.33, 3.30, 3.29, 3.27, 3.17, 3.16, 3.14, 3.13, 3.11, 3.10, 2.97, 2.96, 2.94, 2.94, 2.93, 2.93, 2.91, 2.90, 2.51, 2.44, 2.44, 2.43, 2.42, 2.41, 2.40, 2.40, 2.39, 2.31, 2.30, 2.30, 2.27, 2.27, 2.26, 1.62.

<sup>1</sup>H NMR (400 MHz, Chloroform-*d*) δ 6.84 (s, 2 H), 4.41 (dd, *J* = 10.9, 2.5 Hz, 1 H), 3.47 (dt, *J* = 11.7, 3.1 Hz, 1 H), 3.30 (dd, *J* = 13.1, 10.9 Hz, 1 H), 3.14 (td, *J* = 11.7, 2.2 Hz, 1 H), 2.94 (ddd, *J* = 13.0, 11.7, 2.9 Hz, 1 H), 2.51 (br, 6 H), 2.42 (dq, *J* = 12.9, 2.4 Hz, 1 H), 2.29 (dd, *J* = 13.2, 2.3 Hz, 1 H), 2.26 (s, 3 H), 1.62 (s, 1 H).

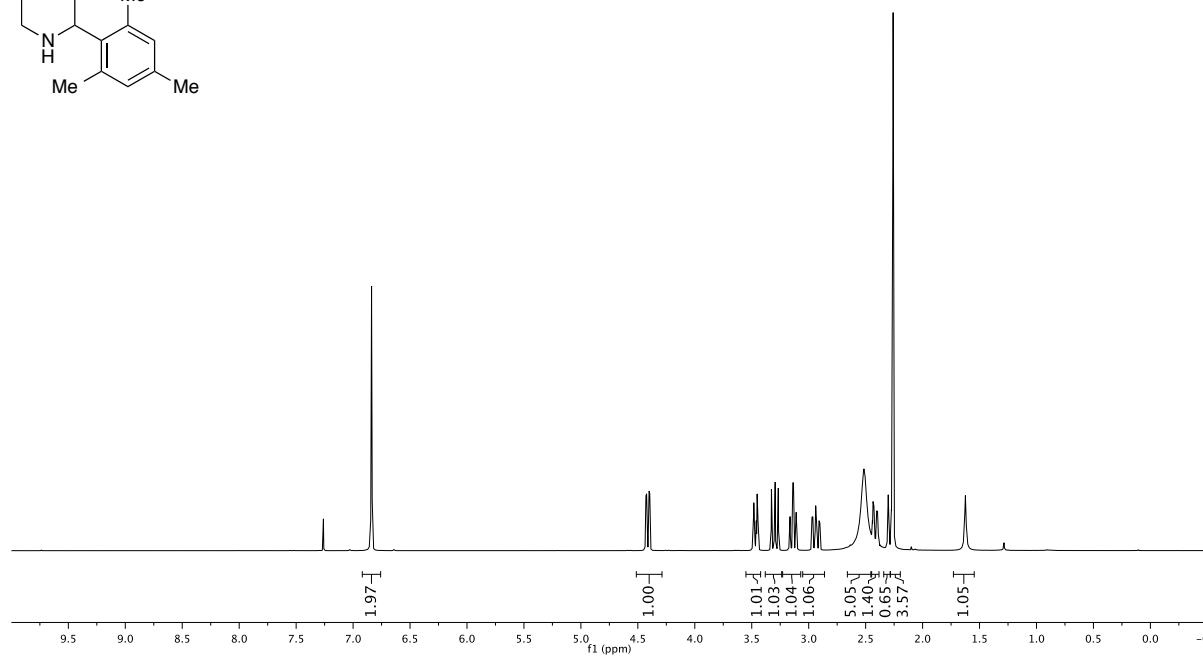

26-24-12-bhsieh.11.fid  
 Sample fly-08-095-CC-6-Mes  
 group bode  
 CAR CDCl<sub>3</sub> /opt/v bhsieh 26

136.8  
 136.6  
 130.3

60.3

50.2

30.2

27.8

21.6

<sup>13</sup>C NMR (101 MHz, CDCl<sub>3</sub>) δ 136.8, 136.7, 136.6, 130.3, 60.3, 50.2, 30.2, 27.8, 21.6, 20.8.

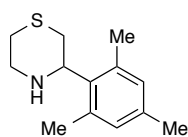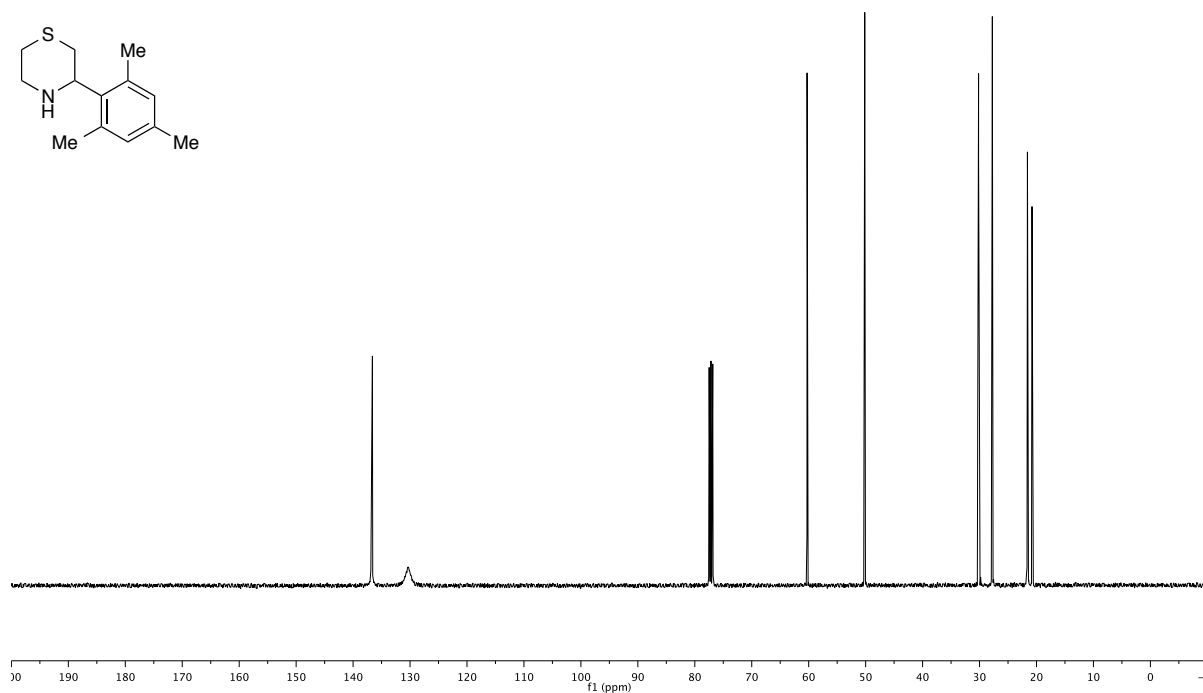

## 3-(Thiophen-3-yl)thiomorpholine (6h) (Scheme 2)

16-03-10-bhsieh.10.fid  
Sample fly-08-048-CC  
group bode

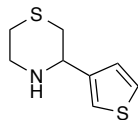

$^1\text{H NMR}$  (400 MHz,  $\text{CDCl}_3$ )  $\delta$  7.30, 7.29, 7.28, 7.28, 7.20, 7.20, 7.20, 7.19, 7.19, 7.08, 7.08, 7.07, 7.07, 7.06, 4.08, 4.08, 4.06, 4.05, 3.45, 3.45, 3.44, 3.42, 3.42, 3.41, 3.19, 3.18, 3.16, 3.15, 3.13, 3.12, 2.90, 2.90, 2.87, 2.87, 2.87, 2.86, 2.84, 2.83, 2.82, 2.81, 2.78, 2.59, 2.58, 2.57, 2.55, 2.55, 2.54, 2.45, 2.44, 2.44, 2.43, 2.42, 2.41, 2.40, 2.40, 1.90.

$^1\text{H NMR}$  (400 MHz, Chloroform-*d*)  $\delta$  7.29 (dd,  $J = 5.0, 3.0$  Hz, 1 H), 7.20 (dt,  $J = 2.8, 1.2$  Hz, 1 H), 7.08 (dd,  $J = 4.9, 1.3$  Hz, 1 H), 4.07 (dd,  $J = 10.5, 2.4$  Hz, 1 H), 3.43 (dt,  $J = 12.3, 3.1$  Hz, 1 H), 3.15 (td,  $J = 11.9, 2.4$  Hz, 1 H), 2.94-2.73 (m, 2 H), 2.56 (dt,  $J = 13.1, 2.3$  Hz, 1 H), 2.42 (dq,  $J = 13.2, 2.5$  Hz, 1H), 1.90 (s, 1 H).

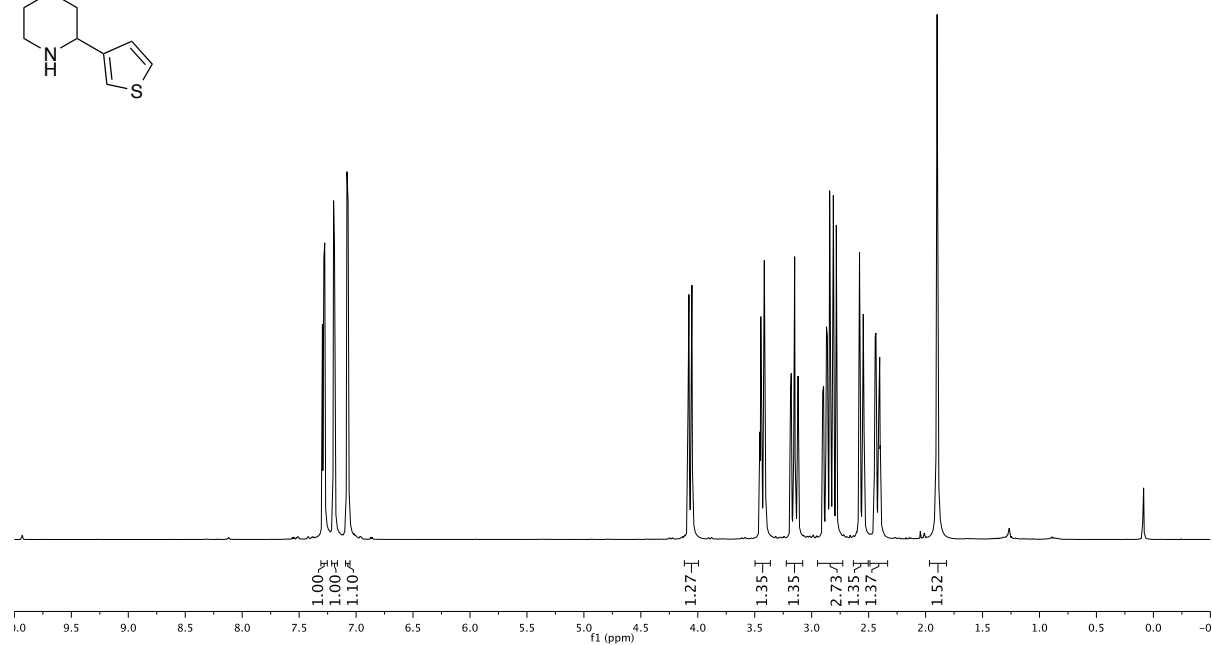

16-03-10-bhsieh.11.fid  
Sample fly-08-048-CC  
group bode

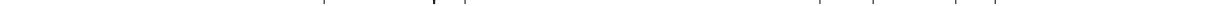

$^{13}\text{C NMR}$  (101 MHz,  $\text{CDCl}_3$ )  $\delta$  145.3, 126.1, 126.0, 120.6, 58.3, 49.0, 34.5, 27.5.

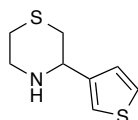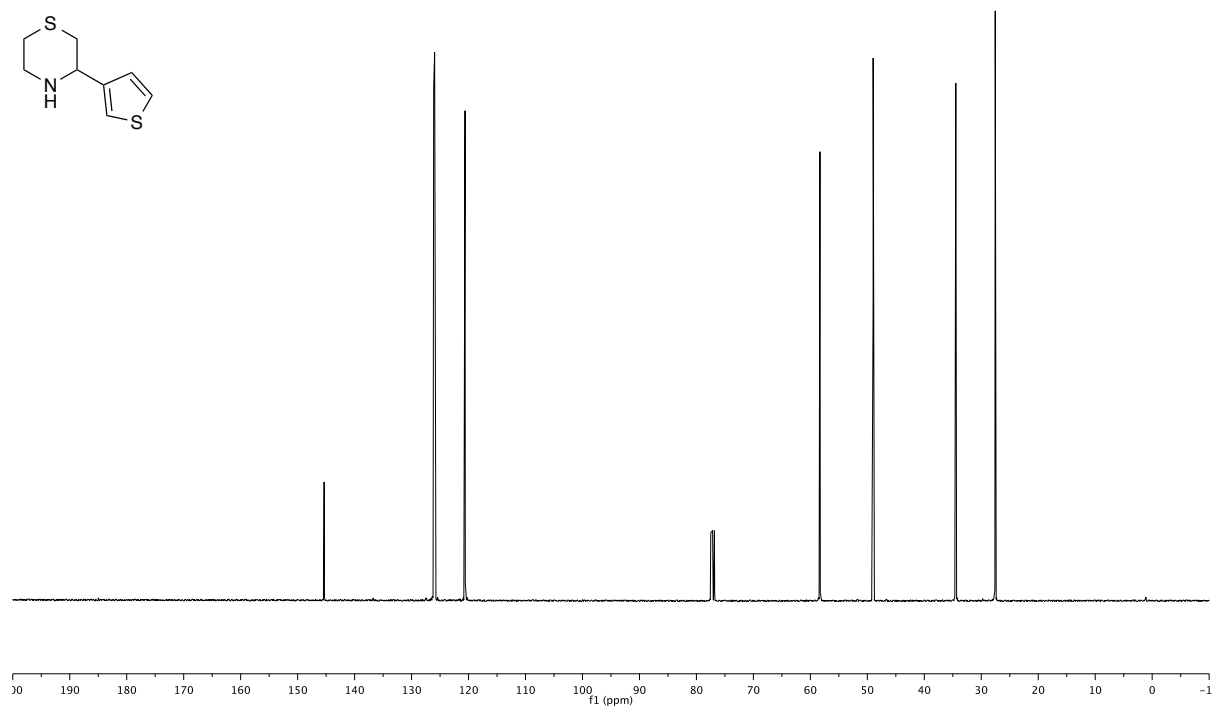

**(E)-3-Styrylthiomorpholine (6i) (Scheme 2)**

23-24-12-bhsieh.10.fid  
 Sample fly-08-041-CC-6-alkene  
 group bode  
 PRO CDCl<sub>3</sub> /opt/v bhsieh 23

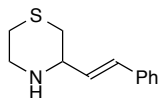

<sup>1</sup>H NMR (400 MHz, CDCl<sub>3</sub>) δ 7.37, 7.37, 7.36, 7.35, 7.35, 7.35, 7.34, 7.34, 7.33, 7.32, 7.32, 7.31, 7.31, 7.31, 7.30, 7.29, 7.29, 7.25, 7.25, 7.25, 7.24, 7.23, 7.23, 7.22, 7.21, 7.21, 6.59, 6.59, 6.55, 6.55, 6.21, 6.19, 6.17, 6.15, 3.60, 3.59, 3.59, 3.59, 3.58, 3.58, 3.57, 3.56, 3.56, 3.55, 3.55, 3.54, 3.42, 3.41, 3.40, 3.39, 3.38, 3.37, 3.13, 3.13, 3.10, 3.10, 3.07, 3.07, 2.83, 2.83, 2.80, 2.80, 2.80, 2.79, 2.77, 2.76, 2.70, 2.68, 2.67, 2.64, 2.52, 2.52, 2.51, 2.49, 2.48, 2.43, 2.43, 2.43, 2.42, 2.42, 2.40, 2.40, 2.39, 2.39, 2.39, 2.38, 1.77.

<sup>1</sup>H NMR (400 MHz, Chloroform-*d*) δ 7.38–7.27 (m, 4 H), 7.26–7.21 (m, 1 H), 6.57 (dd, *J* = 16.0, 1.1 Hz, 1 H), 6.18 (dd, *J* = 16.0, 7.0 Hz, 1 H), 3.62–3.52 (m, 1 H), 3.40 (dt, *J* = 12.2, 3.1 Hz, 1 H), 3.10 (td, *J* = 11.9, 2.4 Hz, 1 H), 2.80 (ddd, *J* = 13.2, 11.5, 3.0 Hz, 1 H), 2.67 (dd, *J* = 13.1, 10.2 Hz, 1 H), 2.50 (dt, *J* = 13.0, 2.2 Hz, 1 H), 2.45–2.38 (m, 1 H), 1.77 (s, 1 H).

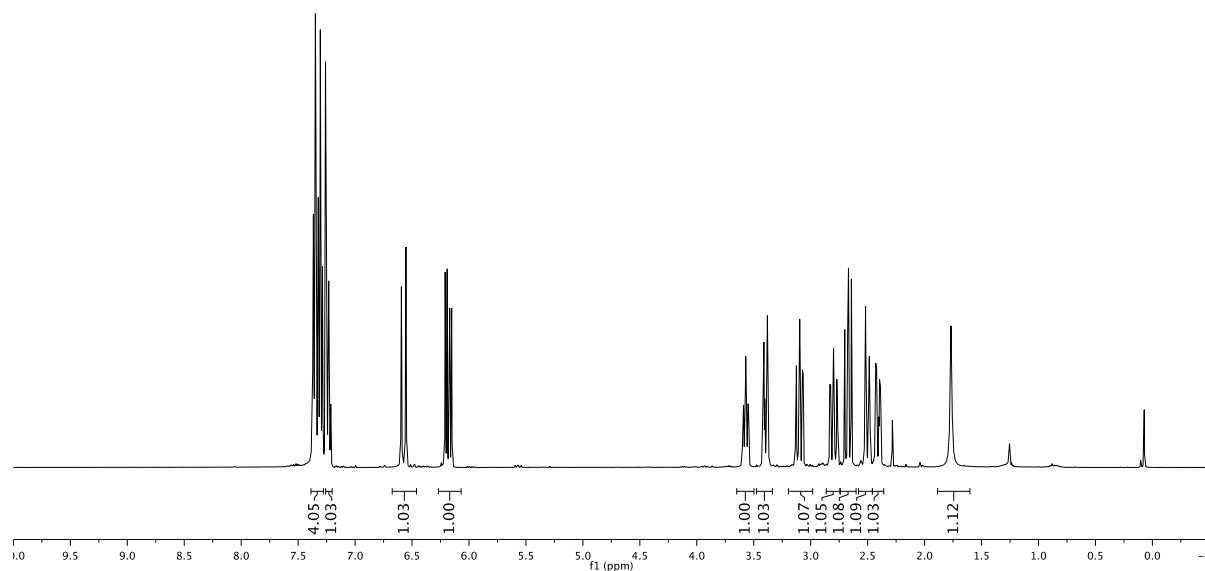

23-24-12-bhsieh.11.fid  
 Sample fly-08-041-CC-6-alkene  
 group bode  
 CAR CDCl<sub>3</sub> /opt/v bhsieh 23

136.6  
 131.7  
 130.7  
 127.8  
 126.5

59.8

48.2

33.1

27.6

<sup>13</sup>C NMR (101 MHz, CDCl<sub>3</sub>) δ 136.8, 131.7, 130.7, 128.7, 127.8, 126.5, 59.8, 48.2, 33.1, 27.6.

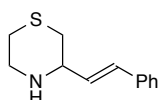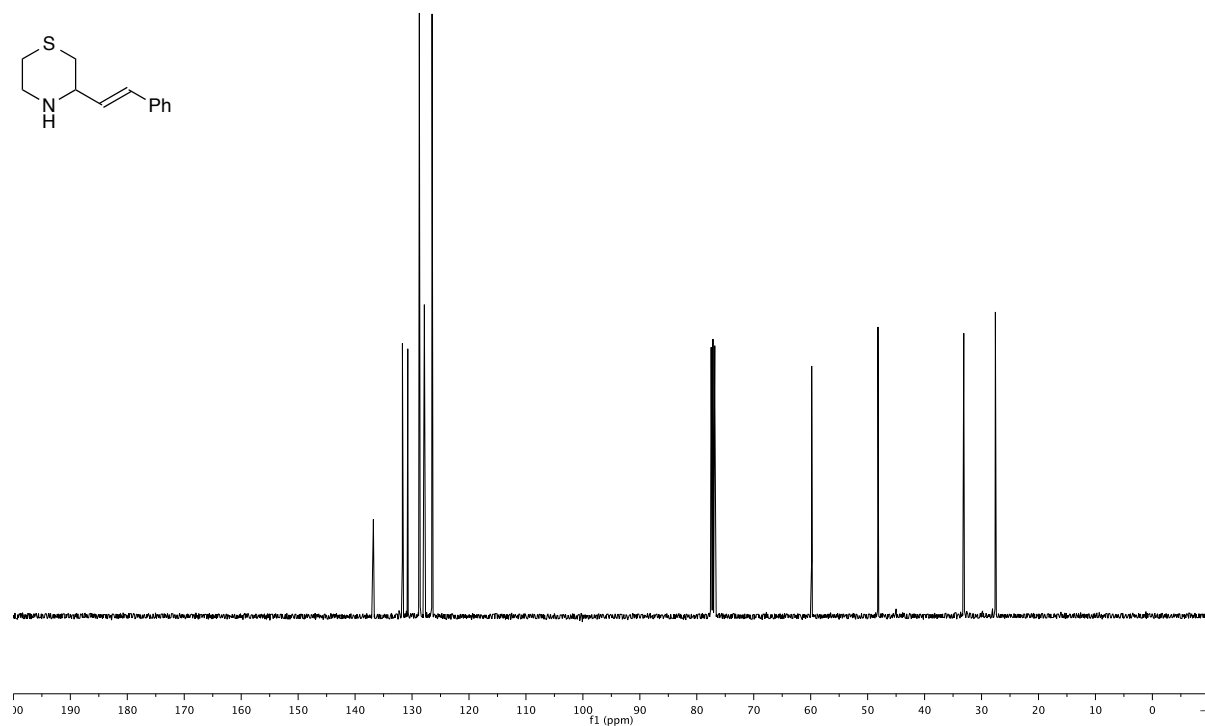

## 9-Oxa-4-thia-1-azaspiro[5.5]undecane (6j) (Scheme 2)

54-21-01-bhsieh.10.fid  
Sample fly-11-125-CC-6-sp-O  
group bode

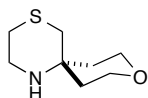

<sup>1</sup>H NMR (400 MHz, CDCl<sub>3</sub>) δ 3.77, 3.76, 3.75, 3.74, 3.73, 3.72, 3.71, 3.61, 3.59, 3.58, 3.58, 3.57, 3.56, 3.55, 3.10, 3.09, 3.08, 3.08, 3.07, 2.54, 2.51, 2.50, 2.49, 2.48, 1.81, 1.80, 1.79, 1.78, 1.76, 1.76, 1.75, 1.75, 1.74, 1.73, 1.71, 1.70.

<sup>1</sup>H NMR (400 MHz, Chloroform-*d*) δ 3.74 (ddd, *J* = 11.6, 7.1, 4.5 Hz, 2 H), 3.58 (dt, *J* = 12.1, 4.9 Hz, 2 H), 3.15–3.02 (m, 2 H), 2.54 (s, 2 H), 2.53–2.44 (m, 2 H), 1.86–1.68 (m, 5 H).

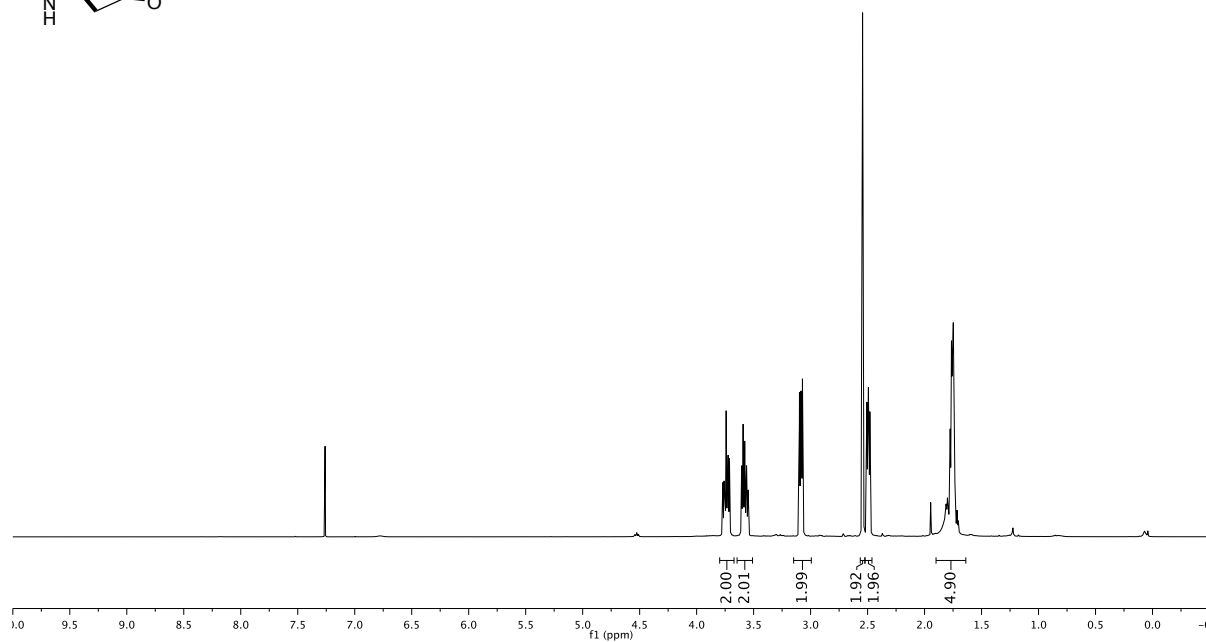

54-21-01-bhsieh.11.fid  
Sample fly-11-125-CC-6-sp-O  
group bode

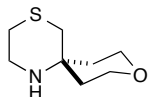

63.5  
47.8  
41.2  
37.4  
36.1  
28.4

<sup>13</sup>C NMR (101 MHz, CDCl<sub>3</sub>) δ 63.5, 47.8, 41.2, 37.4, 36.1, 28.4.

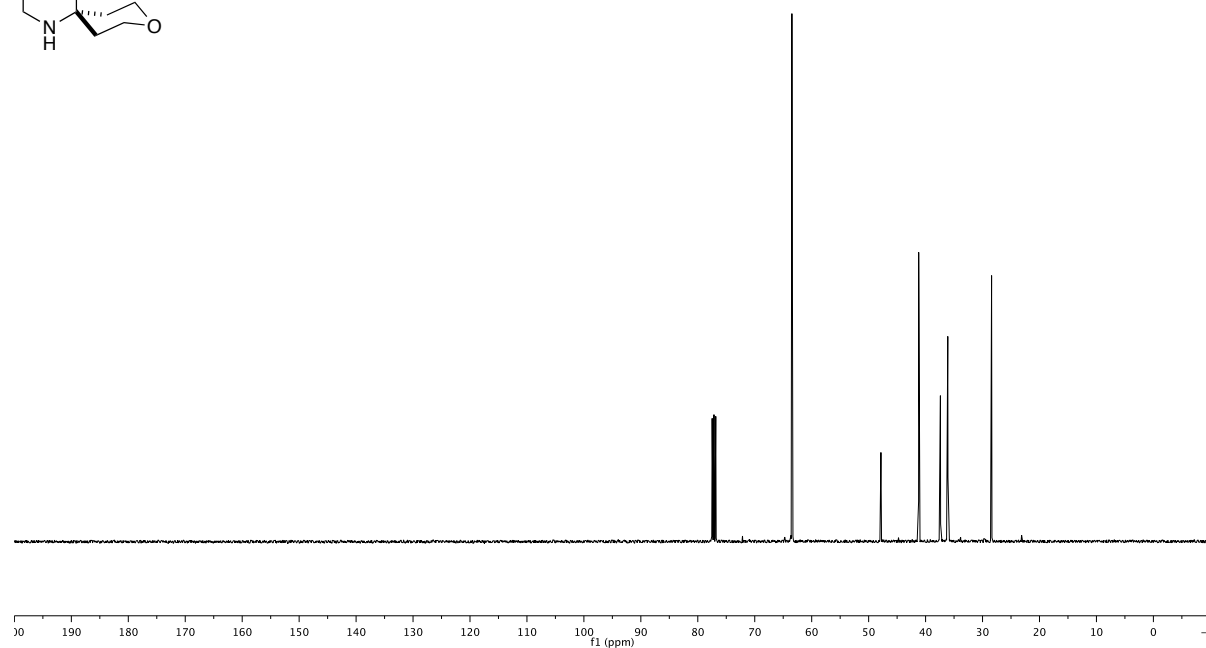

***trans*-3-(4-(Trifluoromethyl)phenyl)-2-(trimethylsilyl)thiomorpholine (7a) (Scheme 2)**

24-24-12-bhsieh.10.fid  
 Sample fly-08-059-CC-6TMS-pCF3  
 group bode  
 PRO CDCl3 /opt/v bhsieh 24

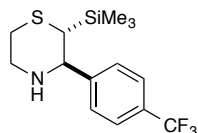

<sup>1</sup>H NMR (400 MHz, CDCl<sub>3</sub>) δ 7.57, 7.57, 7.55, 7.46, 7.44, 3.91, 3.88, 3.40, 3.39, 3.37, 3.36, 3.36, 3.18, 3.17, 3.15, 3.14, 3.12, 3.11, 2.97, 2.96, 2.94, 2.93, 2.93, 2.90, 2.90, 2.56, 2.54, 2.45, 2.44, 2.43, 2.41, 2.41, 2.40, 1.68, -0.28.

<sup>1</sup>H NMR (400 MHz, Chloroform-*d*) δ 7.64–7.52 (m, 2 H), 7.45 (d, *J* = 8.1 Hz, 2 H), 3.89 (d, *J* = 10.2 Hz, 1 H), 3.38 (dt, *J* = 12.0, 3.1 Hz, 1 H), 3.14 (td, *J* = 11.9, 2.4 Hz, 1 H), 2.93 (ddd, *J* = 12.9, 11.8, 3.2 Hz, 1 H), 2.55 (d, *J* = 10.2 Hz, 1 H), 2.42 (dt, *J* = 12.8, 2.6 Hz, 1 H), 1.68 (s, 1 H), -0.28 (s, 9 H).

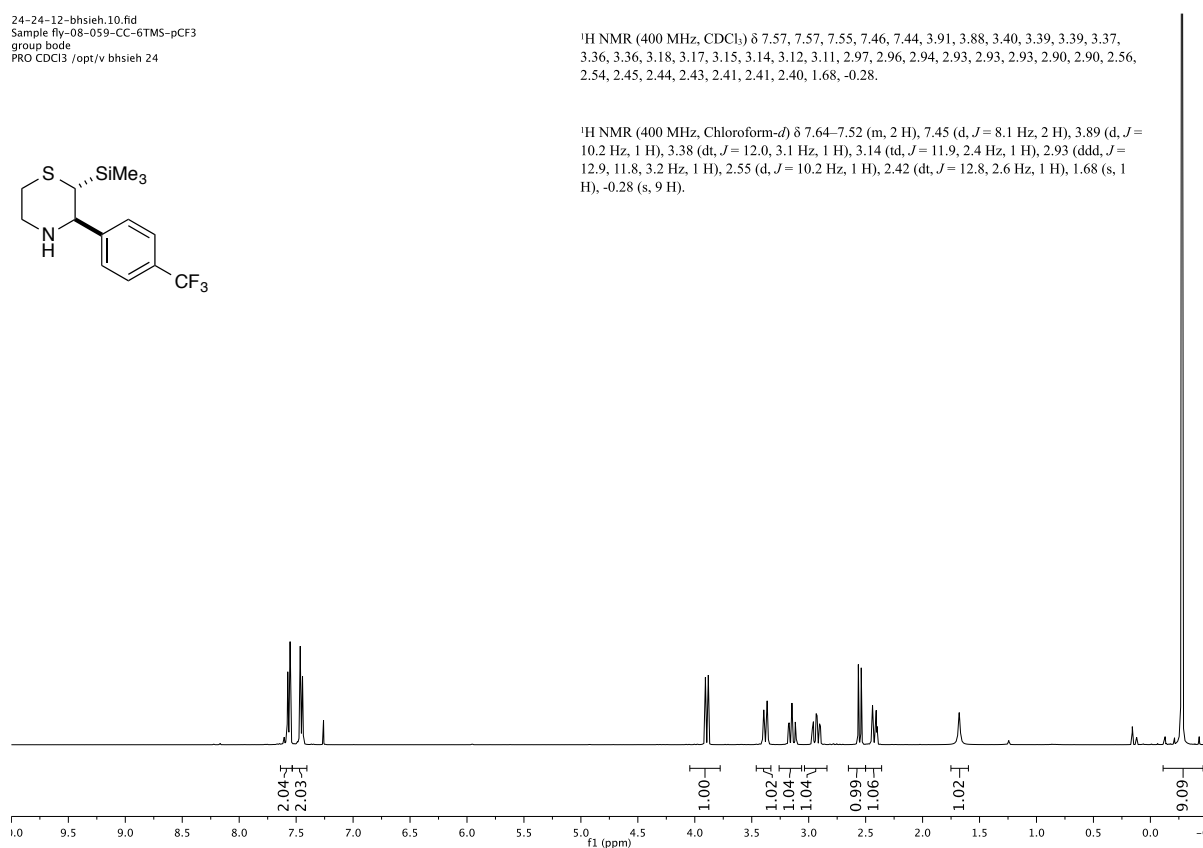

24-24-12-bhsieh.11.fid  
 Sample fly-08-059-CC-6TMS-pCF3  
 group bode  
 CAR CDCl3 /opt/v bhsieh 24

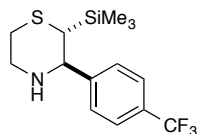

<sup>13</sup>C NMR (101 MHz, CDCl<sub>3</sub>) δ 147.9, 147.9, 131.0, 130.6, 130.3, 130.0, 128.4, 128.2, 125.7, 125.7, 125.6, 125.6, 122.8, 120.1, 65.5, 49.0, 34.5, 28.8, -2.2.

<sup>13</sup>C NMR (101 MHz, Chloroform-*d*) δ 147.9 (q, *J* = 1.4 Hz), 130.5 (q, *J* = 32.4 Hz), 128.4, 125.6 (q, *J* = 3.8 Hz), 124.1 (q, *J* = 272.1 Hz), 65.5, 49.0, 34.5, 28.8, -2.2.

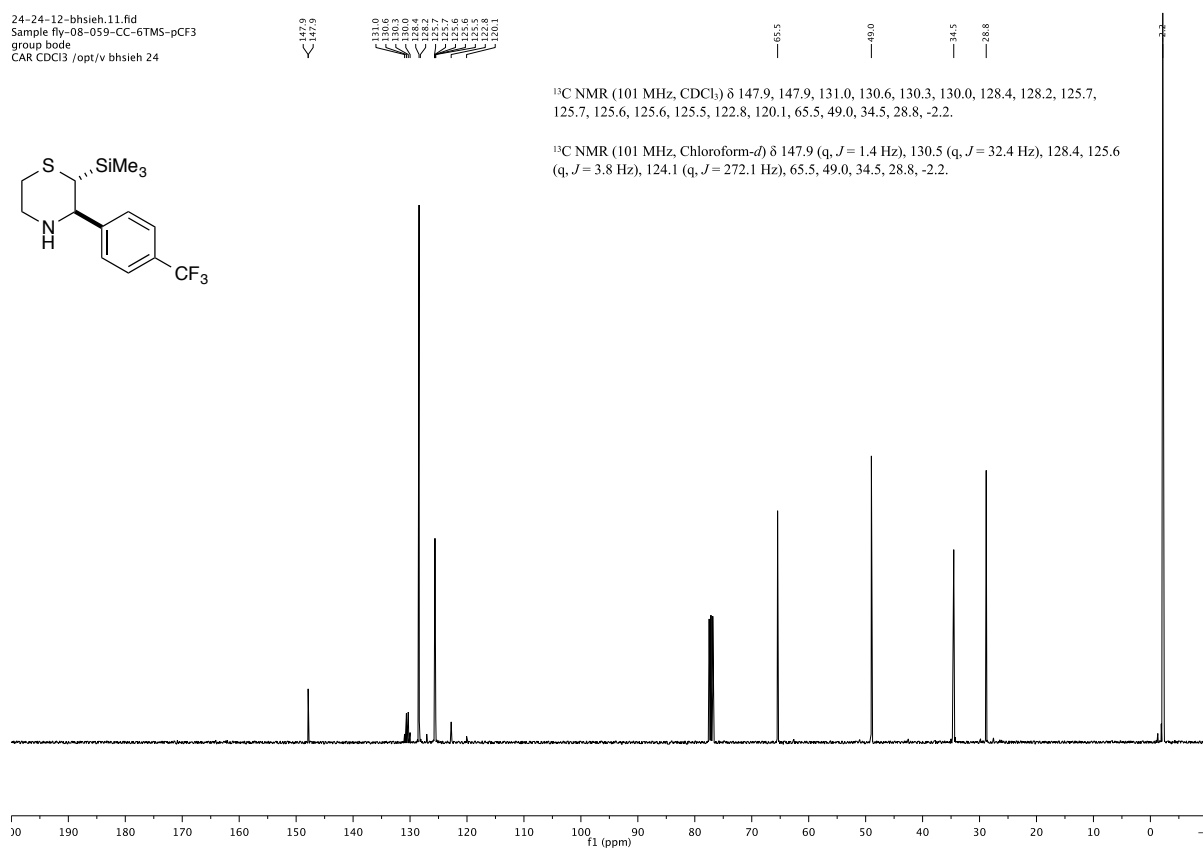

***trans*-3-(4-Nitrophenyl)-2-(trimethylsilyl)thiomorpholine (7b) (Scheme 2)**

29-25-12-bhsieh.10.fid  
 Sample fly-08-058-CC-6TMS-pNO2  
 group bode  
 PRO CDCl3 /opt/v bhsieh 29

<sup>1</sup>H NMR (400 MHz, CDCl<sub>3</sub>) δ 8.17, 8.15, 7.53, 7.51, 3.96, 3.93, 3.39, 3.37, 3.36, 3.36, 3.17, 3.16, 3.14, 3.13, 3.11, 3.10, 2.96, 2.95, 2.93, 2.93, 2.92, 2.92, 2.90, 2.89, 2.55, 2.52, 2.45, 2.44, 2.44, 2.42, 2.41, 1.71, -0.27.

<sup>1</sup>H NMR (400 MHz, Chloroform-*d*) δ 8.16 (d, *J* = 8.8 Hz, 2 H), 7.52 (d, *J* = 8.8 Hz, 2 H), 3.95 (d, *J* = 10.2 Hz, 1 H), 3.50–3.33 (m, 1 H), 3.14 (td, *J* = 11.9, 2.4 Hz, 1 H), 2.93 (ddd, *J* = 13.0, 11.8, 3.2 Hz, 1 H), 2.54 (d, *J* = 10.2 Hz, 1 H), 2.43 (dt, *J* = 12.9, 2.7 Hz, 1 H), 1.71 (s, 1 H), -0.27 (s, 9 H).

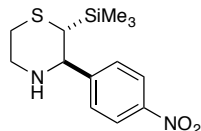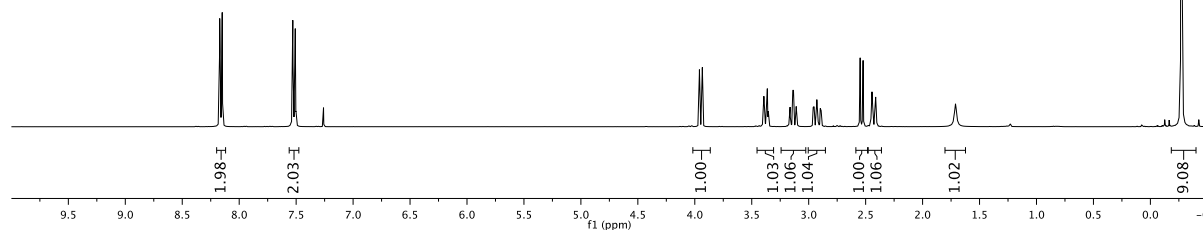

29-25-12-bhsieh.11.fid  
 Sample fly-08-058-CC-6TMS-pNO2  
 group bode  
 CAR CDCl3 /opt/v bhsieh 29

151.1  
 147.7  
 129.0  
 123.9

<sup>13</sup>C NMR (101 MHz, CDCl<sub>3</sub>) δ 151.1, 147.7, 129.0, 123.9, 65.1, 48.8, 34.6, 28.8, -2.1.

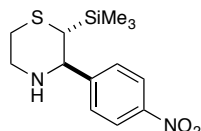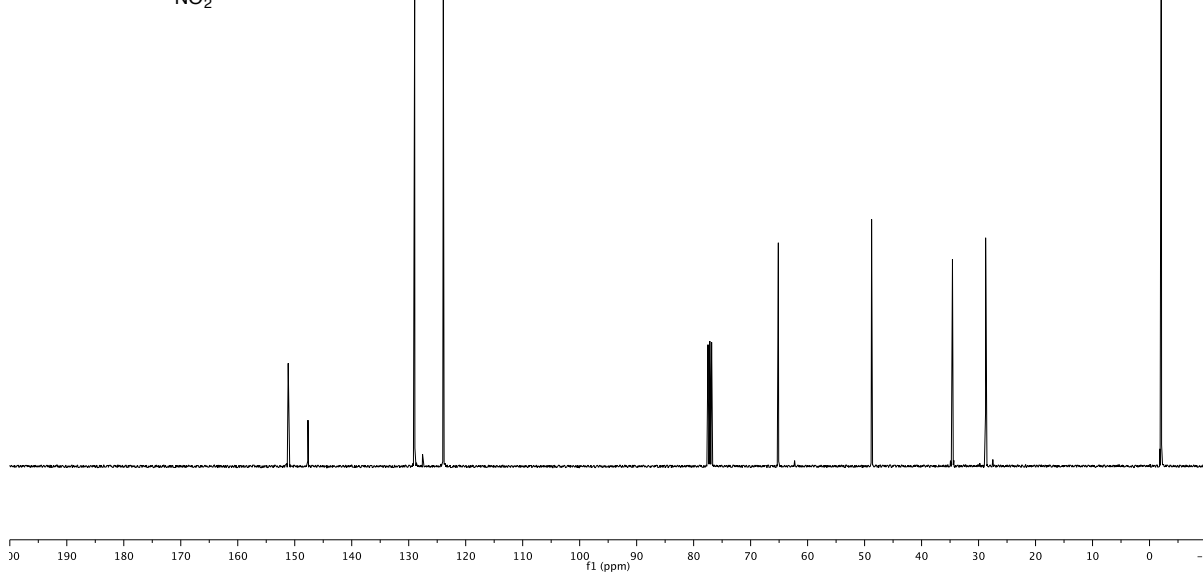



***trans*-3-(4-Fluorophenyl)-2-(trimethylsilyl)thiomorpholine (7c) (Scheme 2)**

15-03-10-bhsieh.10.fid  
Sample fly-08-049-CC  
group bode

<sup>1</sup>H NMR (400 MHz, CDCl<sub>3</sub>) δ 7.30, 7.30, 7.29, 7.29, 7.28, 7.27, 7.27, 7.00, 6.99, 6.98, 6.97, 6.96, 6.95, 3.81, 3.79, 3.39, 3.38, 3.37, 3.37, 3.37, 3.36, 3.35, 3.35, 3.34, 3.34, 3.16, 3.15, 3.15, 3.13, 3.12, 3.12, 3.10, 3.10, 3.09, 3.09, 2.94, 2.94, 2.93, 2.93, 2.91, 2.91, 2.90, 2.88, 2.87, 2.87, 2.87, 2.52, 2.52, 2.49, 2.49, 2.42, 2.41, 2.41, 2.40, 2.39, 2.38, 2.38, 1.73, -0.27, -0.28.

<sup>1</sup>H NMR (400 MHz, Chloroform-*d*) δ 7.35–7.20 (m, 2 H), 7.03–6.92 (m, 2 H), 3.80 (d, *J* = 10.3 Hz, 1 H), 3.36 (ddd, *J* = 12.0, 3.7, 2.4 Hz, 1 H), 3.19–3.07 (m, 1 H), 2.98–2.80 (m, 1 H), 2.50 (dd, *J* = 10.4, 1.1 Hz, 1 H), 2.40 (dt, *J* = 13.0, 2.7 Hz, 1 H), 1.73 (br, 1 H), -0.27 (d, *J* = 1.0 Hz, 9 H).

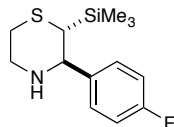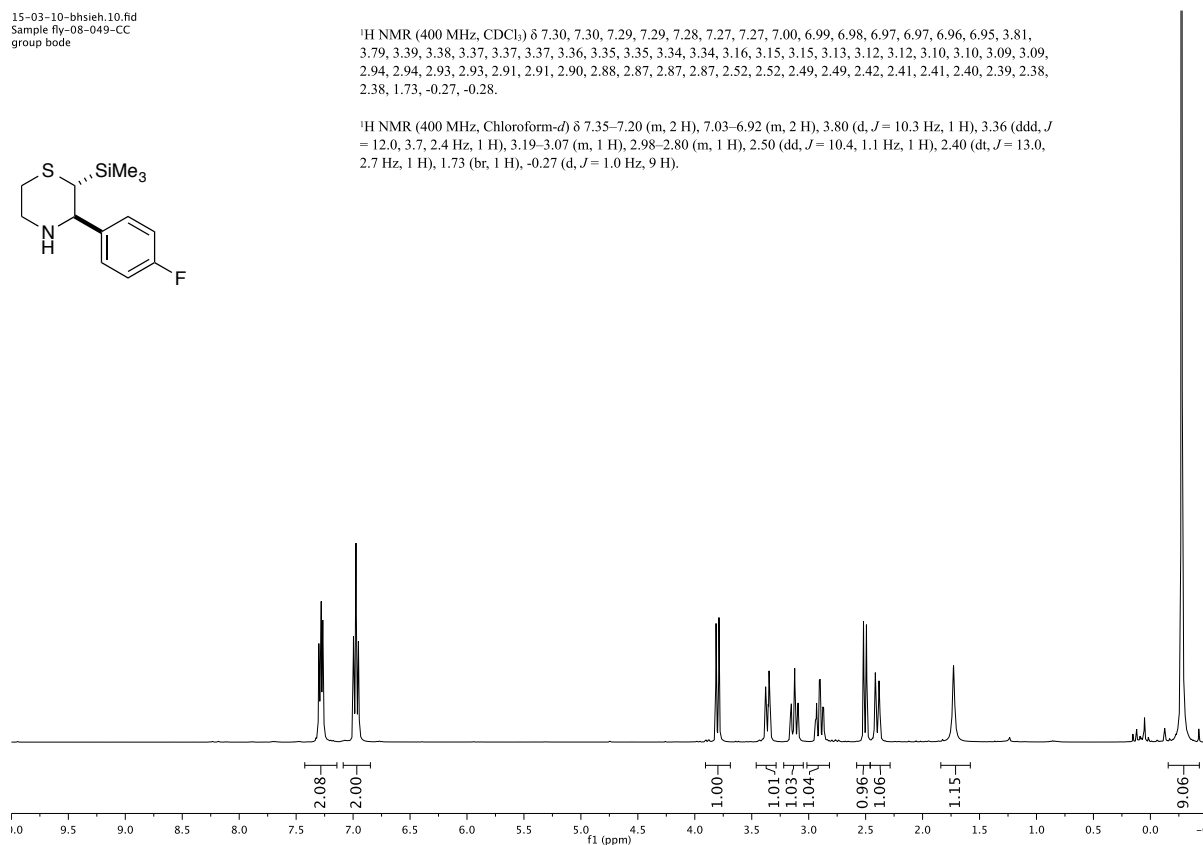

15-03-10-bhsieh.11.fid  
Sample fly-08-049-CC  
group bode

163.7, 161.3, 140.0, 140.0, 129.5, 129.4, 115.6, 115.4, 65.0, 49.2, 34.6, 28.8, -2.2

<sup>13</sup>C NMR (101 MHz, CDCl<sub>3</sub>) δ 163.7, 161.3, 140.0, 140.0, 129.5, 129.4, 115.6, 115.4, 65.0, 49.2, 34.6, 28.8, -2.2.

<sup>13</sup>C NMR (101 MHz, Chloroform-*d*) δ 162.5 (d, *J* = 246.4 Hz), 140.0 (d, *J* = 3.3 Hz), 129.5 (d, *J* = 8.0 Hz), 115.5 (d, *J* = 21.1 Hz), , 65.0, 49.2, 34.6, 28.8, -2.2.

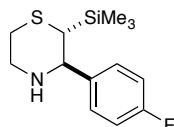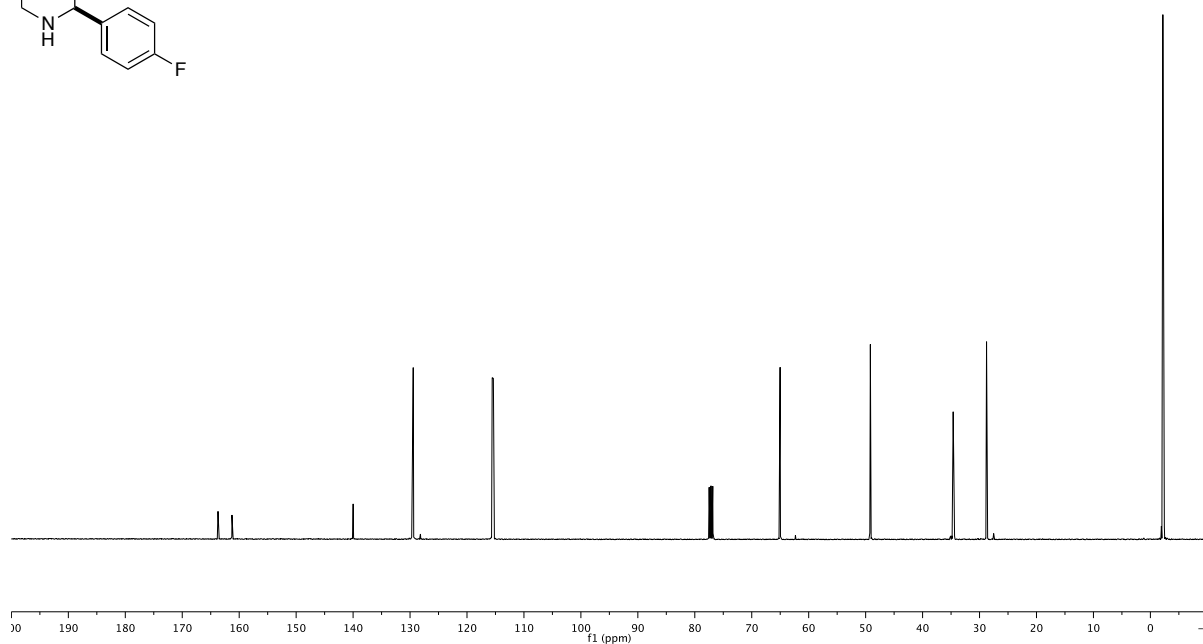

## 3-(4-(Trifluoromethyl)phenyl)-1,4-thiazepane (8a) (Scheme 2)

27-24-12-bhsieh.10.fid  
Sample fly-08-132-CC-7-pCF3  
group bode  
PRO CDCl3 /opt/v bhsieh 27

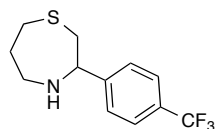

$^1\text{H NMR}$  (400 MHz,  $\text{CDCl}_3$ )  $\delta$  7.58, 7.56, 7.49, 7.47, 4.04, 4.03, 4.02, 4.01, 3.21, 3.20, 3.19, 3.18, 3.17, 3.16, 3.16, 3.15, 3.14, 3.13, 3.11, 3.10, 3.09, 3.08, 3.07, 2.96, 2.96, 2.95, 2.95, 2.93, 2.93, 2.93, 2.92, 2.92, 2.90, 2.89, 2.88, 2.87, 2.86, 2.85, 2.85, 2.84, 2.84, 2.83, 2.83, 2.82, 2.82, 2.81, 2.81, 2.80, 2.79, 2.77, 2.76, 2.74, 2.11, 2.10, 2.09, 2.08, 2.07, 2.06, 2.05, 2.05, 2.04, 2.03, 2.03, 2.01, 1.94, 1.93, 1.92, 1.92, 1.91, 1.90, 1.90, 1.89, 1.89, 1.88, 1.87, 1.87, 1.86, 1.86, 1.85, 1.84.

$^1\text{H NMR}$  (400 MHz, Chloroform-*d*)  $\delta$  7.57 (d,  $J = 8.1$  Hz, 2 H), 7.48 (d,  $J = 8.1$  Hz, 2 H), 4.03 (dd,  $J = 9.0, 3.9$  Hz, 1 H), 3.24–3.05 (m, 2 H), 3.02–2.68 (m, 4 H), 2.06 (ddt,  $J = 14.4, 10.1, 5.1$  Hz, 1 H), 1.97–1.78 (m, 2 H).

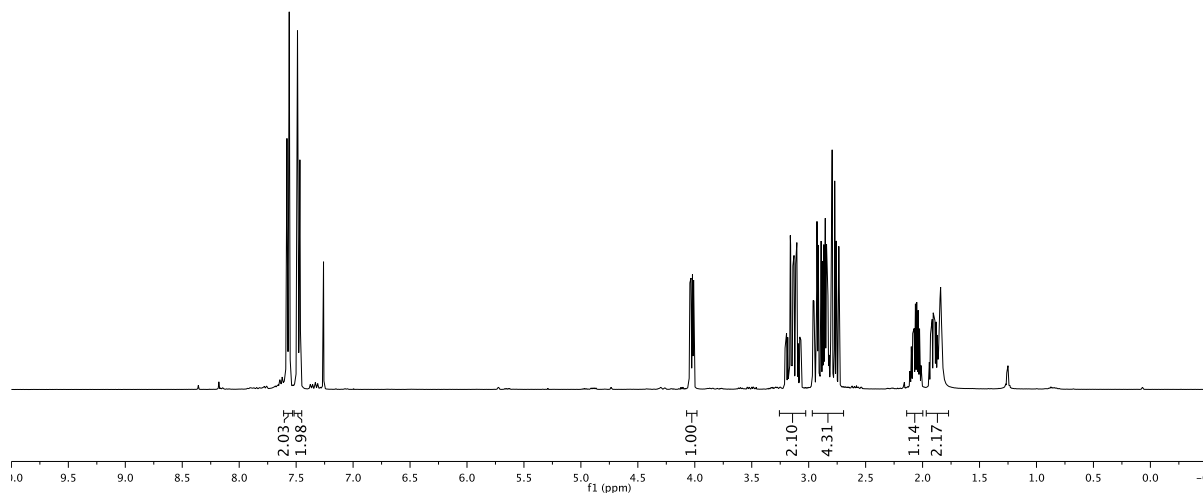

27-24-12-bhsieh.11.fid  
Sample fly-08-132-CC-7-pCF3  
group bode  
CAR CDCl3 /opt/v bhsieh 27

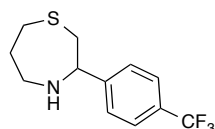

$^{13}\text{C NMR}$  (101 MHz,  $\text{CDCl}_3$ )  $\delta$  148.6 (q,  $J = 1.4$  Hz), 129.7 (q,  $J = 32.4$  Hz), 127.1, 125.6 (q,  $J = 3.7$  Hz), 124.3 (q,  $J = 271.9$  Hz), 66.8, 47.0, 43.3, 33.7, 33.0.

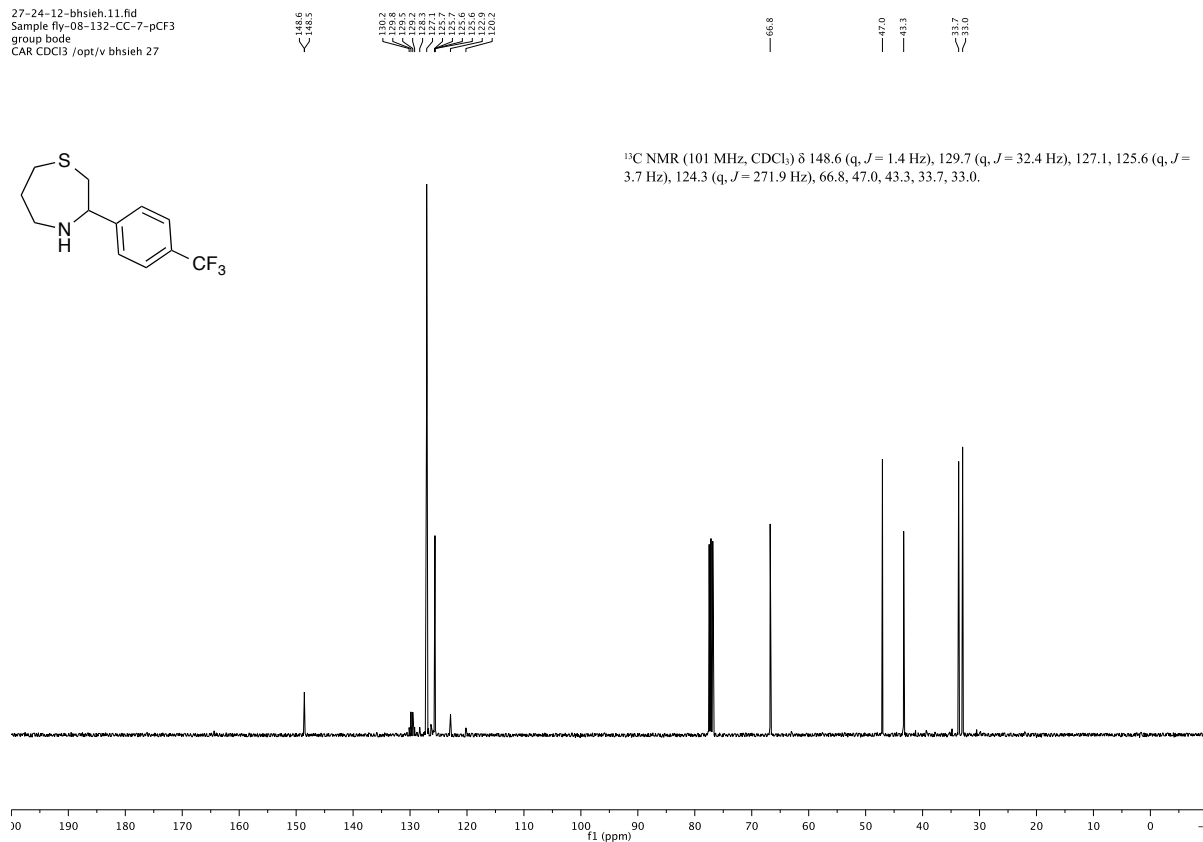

## 3-(1,4-Thiazepan-3-yl)benzonitrile (8b) (Scheme 2)

32-25-12-bhsieh.10.fid  
Sample fly-08-114-CC-7-mCN  
group bode  
PRO CDCl<sub>3</sub> /opt/v bhsieh 32

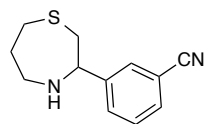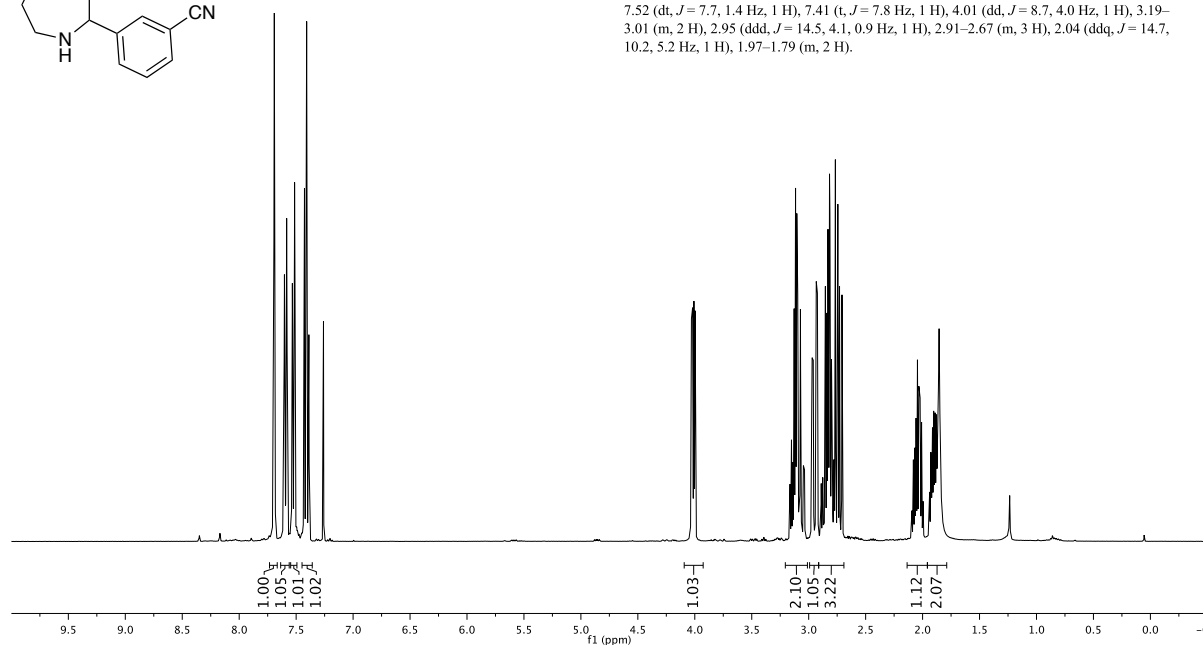

32-25-12-bhsieh.11.fid  
Sample fly-08-114-CC-7-mCN  
group bode  
CAR CDCl<sub>3</sub> /opt/v bhsieh 32

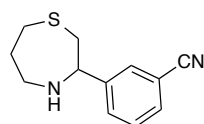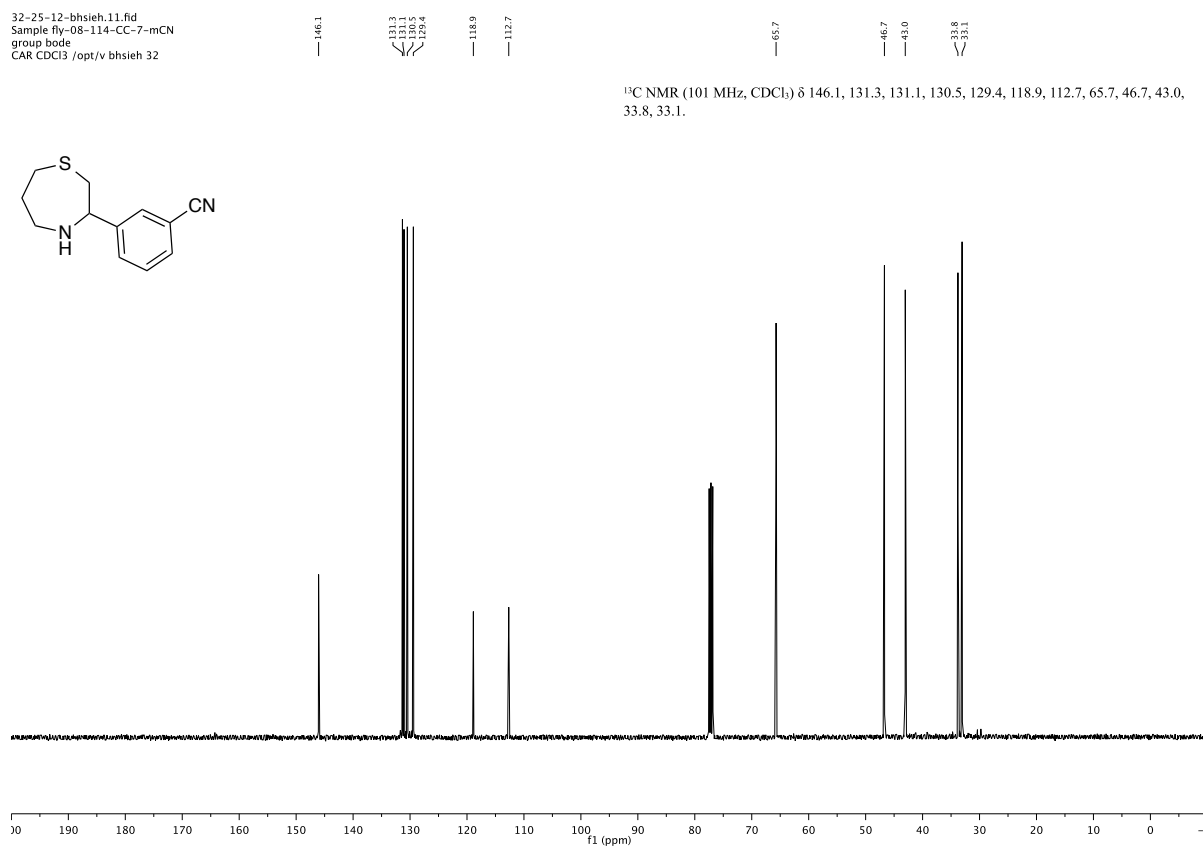

## 3-(3-Bromophenyl)-1,4-thiazepane (8c) (Scheme 2)

30-25-12-bhsieh.10.fid  
 Sample fly-08-097-7-mBr  
 group bode  
 PRO CDCl3 /opt/v bhsieh 30

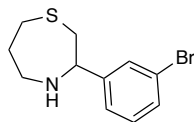

$^1\text{H NMR}$  (400 MHz,  $\text{CDCl}_3$ )  $\delta$  7.53, 7.53, 7.52, 7.39, 7.38, 7.38, 7.38, 7.37, 7.36, 7.36, 7.36, 7.28, 7.28, 7.28, 7.26, 7.26, 7.26, 7.20, 7.18, 7.16, 3.94, 3.93, 3.91, 3.90, 3.20, 3.19, 3.19, 3.18, 3.16, 3.15, 3.15, 3.14, 3.12, 3.11, 3.10, 3.09, 3.08, 3.06, 3.05, 2.93, 2.93, 2.92, 2.92, 2.91, 2.90, 2.90, 2.89, 2.89, 2.88, 2.87, 2.86, 2.85, 2.85, 2.84, 2.84, 2.84, 2.83, 2.83, 2.82, 2.82, 2.81, 2.80, 2.80, 2.79, 2.79, 2.78, 2.76, 2.75, 2.72, 2.10, 2.09, 2.09, 2.08, 2.07, 2.06, 2.06, 2.05, 2.04, 2.04, 2.03, 2.03, 2.02, 2.01, 2.00, 1.92, 1.91, 1.90, 1.90, 1.89, 1.88, 1.88, 1.87, 1.87, 1.86, 1.86, 1.85, 1.84, 1.84, 1.83, 1.82.

$^1\text{H NMR}$  (400 MHz, Chloroform-*d*)  $\delta$  7.53 (t,  $J = 1.9$  Hz, 1 H), 7.37 (ddd,  $J = 7.9, 2.1, 1.1$  Hz, 1 H), 7.33–7.23 (m, 1 H), 7.18 (t,  $J = 7.8$  Hz, 1 H), 3.92 (dd,  $J = 9.2, 3.8$  Hz, 1 H), 3.23–3.03 (m, 2 H), 2.96–2.70 (m, 4 H), 2.13–1.97 (m, 1 H), 1.87 (dddt,  $J = 13.8, 10.1, 6.2, 4.0$  Hz, 2 H).

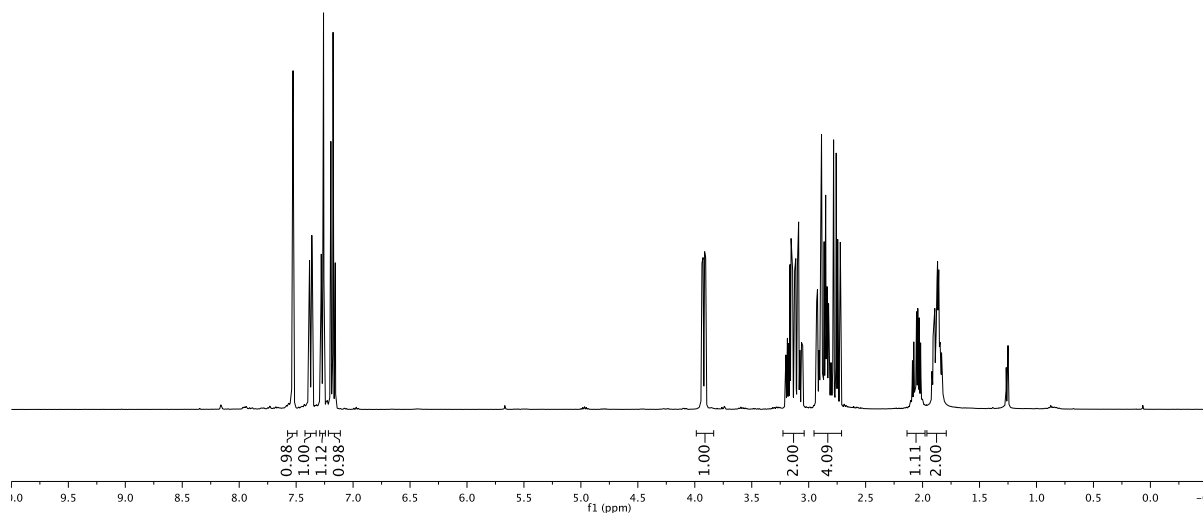

30-25-12-bhsieh.11.fid  
 Sample fly-08-097-7-mBr  
 group bode  
 CAR CDCl3 /opt/v bhsieh 30

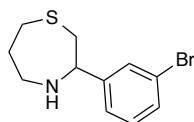

$^{13}\text{C NMR}$  (101 MHz,  $\text{CDCl}_3$ )  $\delta$  146.9, 130.5, 130.3, 129.8, 125.4, 122.8, 66.9, 47.1, 43.4, 33.5, 32.9.

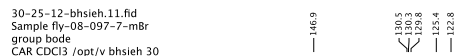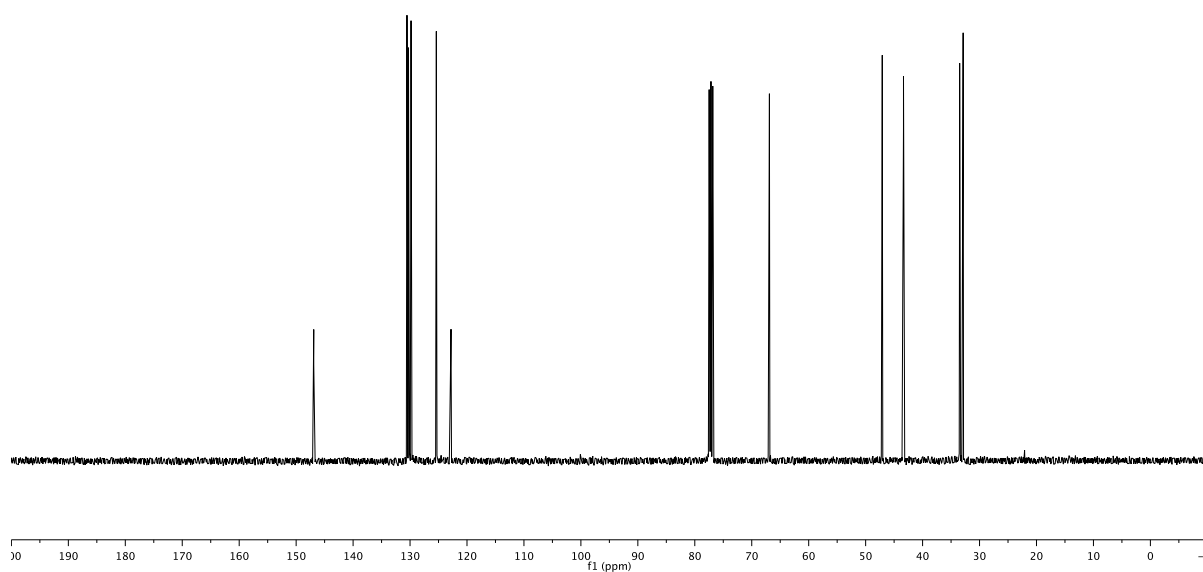

## 3-(Pyridin-4-yl)thiomorpholine (6k) (Scheme 3)

54-02-01-bhsieh.10.fid  
 Sample fly-08-104-CC-6-pPy  
 group bode  
 PRO CDCl<sub>3</sub> /opt/v bhsieh 54

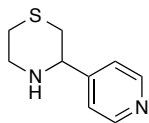

<sup>1</sup>H NMR (400 MHz, CDCl<sub>3</sub>) δ 8.56, 8.55, 8.54, 8.54, 7.29, 7.28, 7.28, 7.27, 3.96, 3.95, 3.93, 3.92, 3.47, 3.46, 3.46, 3.44, 3.43, 3.42, 3.18, 3.18, 3.15, 3.15, 3.12, 3.12, 2.92, 2.91, 2.89, 2.89, 2.88, 2.88, 2.86, 2.85, 2.79, 2.76, 2.75, 2.73, 2.50, 2.50, 2.49, 2.47, 2.47, 2.46, 2.46, 2.45, 2.45, 2.43, 2.42, 2.42, 2.08.

<sup>1</sup>H NMR (400 MHz, Chloroform-*d*) δ 8.79–8.36 (m, 2 H), 7.39–7.10 (m, 2 H), 3.94 (dd, *J* = 10.5, 2.3 Hz, 1 H), 3.45 (dt, *J* = 12.2, 3.1 Hz, 1 H), 3.15 (td, *J* = 11.9, 2.3 Hz, 1 H), 2.89 (ddd, *J* = 13.1, 11.7, 3.0 Hz, 1 H), 2.76 (dd, *J* = 13.1, 10.5 Hz, 1 H), 2.46 (ddt, *J* = 17.8, 10.7, 2.4 Hz, 2 H), 2.08 (br, 1 H).

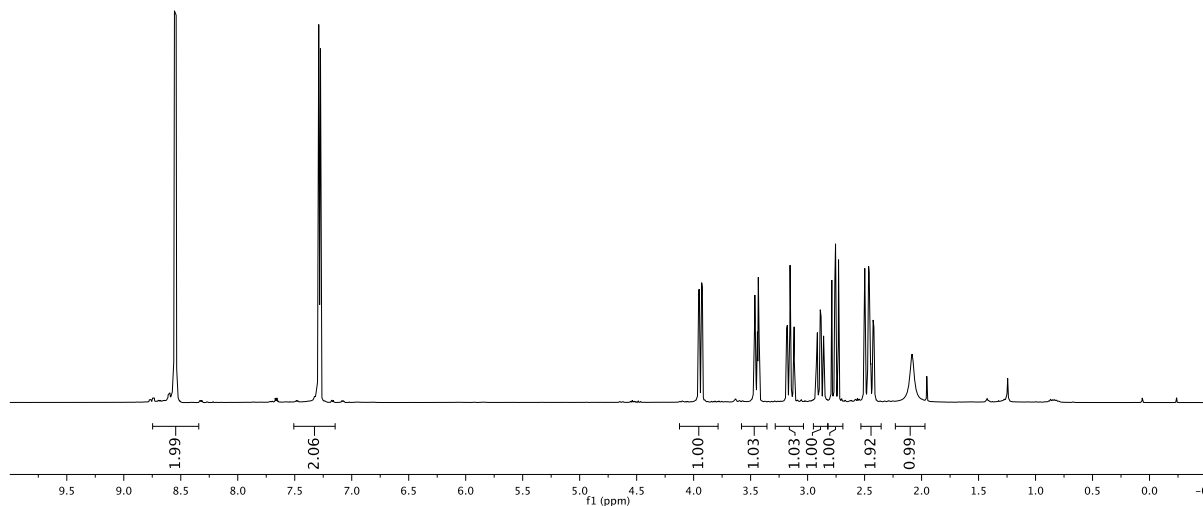

54-02-01-bhsieh.11.fid  
 Sample fly-08-104-CC-6-pPy  
 group bode  
 CAR CDCl<sub>3</sub> /opt/v bhsieh 54

152.4  
 150.3  
 121.7

61.7  
 48.7  
 34.5  
 27.4

<sup>13</sup>C NMR (101 MHz, CDCl<sub>3</sub>) δ 152.4, 150.3, 121.7, 61.7, 48.7, 34.5, 27.4.

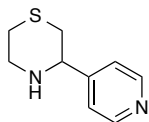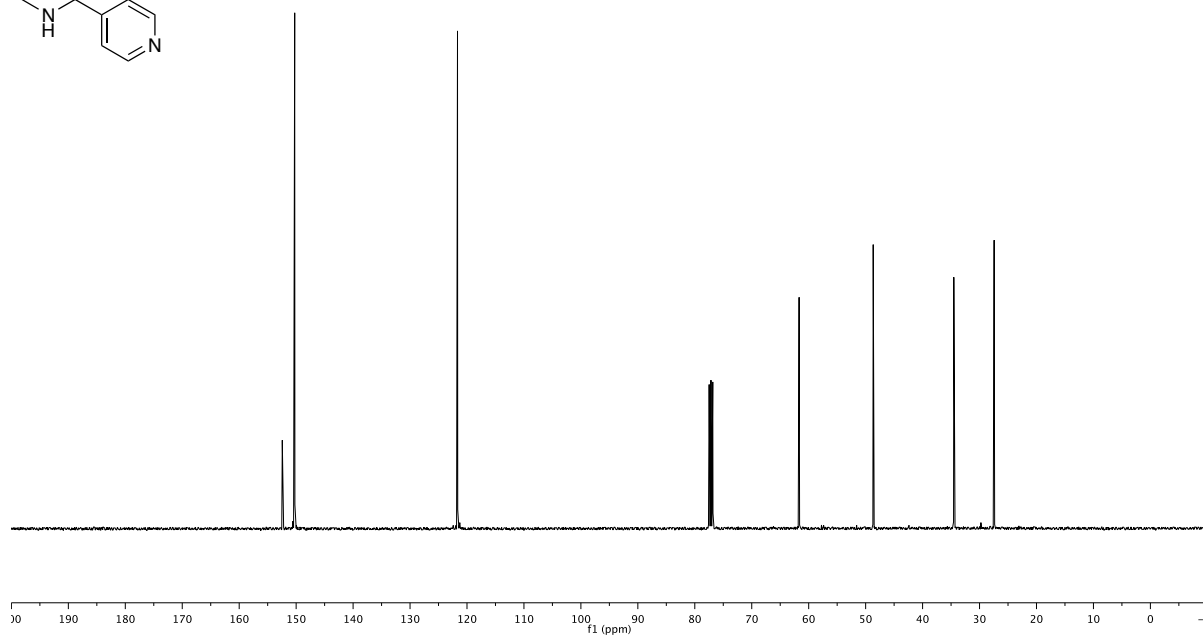

## 3-(2-Phenylpyrimidin-5-yl)thiomorpholine (6l) (Scheme 3)

34-26-12-bhsieh.10.fid  
Sample fly-09-026-CC-6-pdPh  
group bode  
PRO CDCl3 /opt/v bhsieh 34

$^1\text{H NMR}$  (400 MHz,  $\text{CDCl}_3$ )  $\delta$  8.75, 8.42, 8.41, 8.41, 8.41, 8.40, 8.40, 8.40, 8.39, 8.39, 8.39, 7.48, 7.48, 7.48, 7.47, 7.47, 7.47, 7.46, 7.45, 3.97, 3.96, 3.94, 3.93, 3.44, 3.43, 3.42, 3.41, 3.40, 3.39, 3.15, 3.14, 3.12, 3.11, 3.09, 3.09, 2.92, 2.91, 2.89, 2.88, 2.88, 2.88, 2.85, 2.85, 2.83, 2.82, 2.80, 2.50, 2.49, 2.48, 2.46, 2.46, 2.46, 2.45, 2.45, 2.44, 2.44, 2.42, 2.42, 2.41, 1.89.

$^1\text{H NMR}$  (400 MHz,  $\text{Chloroform-}d$ )  $\delta$  8.75 (s, 2 H), 8.51–8.31 (m, 2 H), 7.58–7.38 (m, 3 H), 3.95 (dd,  $J = 10.6, 2.3$  Hz, 1 H), 3.42 (dt,  $J = 12.2, 3.1$  Hz, 1 H), 3.12 (td,  $J = 11.9, 2.3$  Hz, 1 H), 2.98–2.73 (m, 2 H), 2.58–2.34 (m, 2 H), 1.89 (br, 1 H).

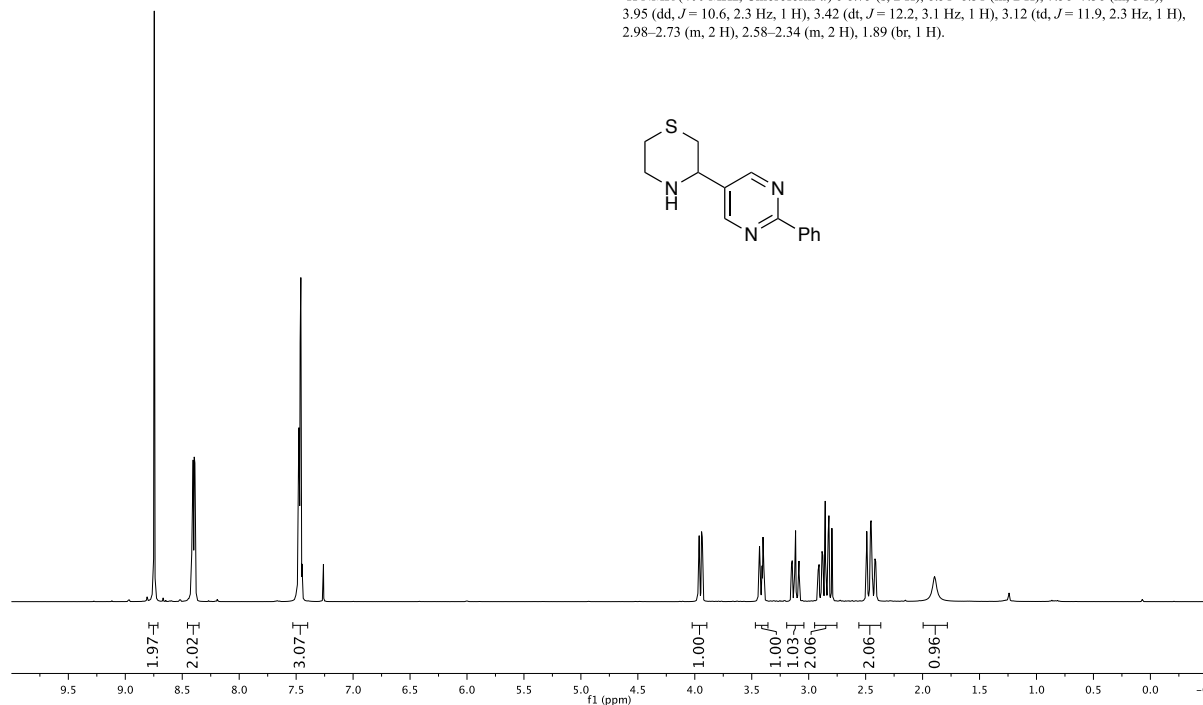

34-26-12-bhsieh.11.fid  
Sample fly-09-026-CC-6-pdPh  
group bode  
CAR CDCl3 /opt/v bhsieh 34

164.3

155.9

137.4

134.5

130.8

128.7

128.2

58.3

48.8

34.6

27.4

$^{13}\text{C NMR}$  (101 MHz,  $\text{CDCl}_3$ )  $\delta$  164.3, 155.9, 137.4, 134.5, 130.8, 128.7, 128.2, 58.3, 48.8, 34.6, 27.4.

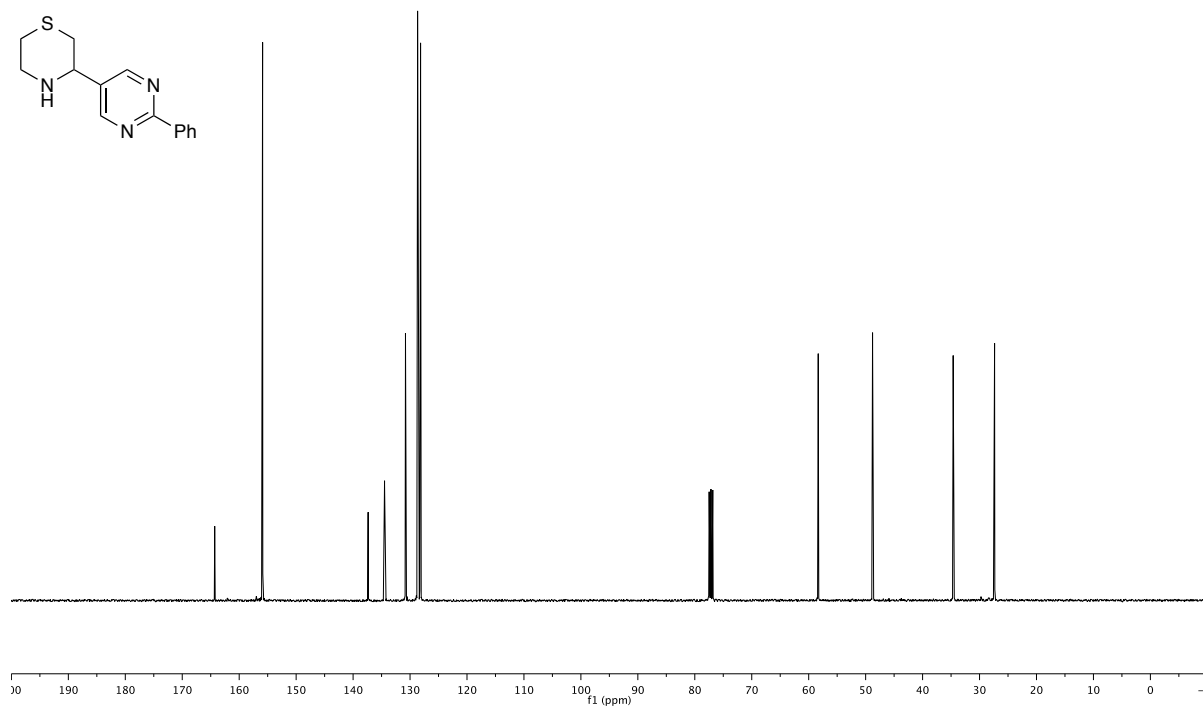

3-(1-Benzyl-1*H*-imidazol-5-yl)thiomorpholine (6m) (Scheme 3)

56-02-01-bhsieh.10.fid  
Sample fly-08-144-CC-6-im8n  
group bode  
PRO CDCl<sub>3</sub> /opt/v bhsieh 56

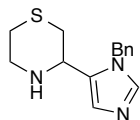

<sup>1</sup>H NMR (400 MHz, CDCl<sub>3</sub>) δ 7.47, 7.47, 7.36, 7.36, 7.35, 7.35, 7.34, 7.33, 7.33, 7.32, 7.32, 7.31, 7.31, 7.30, 7.29, 7.28, 7.28, 7.28, 7.10, 7.10, 7.09, 7.08, 7.08, 7.08, 6.99, 5.31, 5.27, 5.20, 5.16, 3.87, 3.86, 3.84, 3.84, 3.33, 3.32, 3.31, 3.30, 3.29, 3.28, 3.00, 3.00, 2.97, 2.97, 2.97, 2.96, 2.94, 2.94, 2.83, 2.80, 2.80, 2.77, 2.75, 2.74, 2.72, 2.71, 2.71, 2.70, 2.68, 2.68, 2.42, 2.42, 2.41, 2.39, 2.38, 2.38, 2.35, 2.34, 2.33, 2.33, 2.31, 2.31, 2.30, 2.29, 2.03.

<sup>1</sup>H NMR (400 MHz, Chloroform-*d*) δ 7.47 (d, *J* = 1.1 Hz, 1 H), 7.38–7.26 (m, 3 H), 7.12–7.06 (m, 2 H), 6.99 (s, 1 H), 5.29 (d, *J* = 15.7 Hz, 1 H), 5.18 (d, *J* = 15.7 Hz, 1 H), 3.85 (dd, *J* = 10.5, 2.3 Hz, 1 H), 3.31 (dt, *J* = 13.0, 3.0 Hz, 1 H), 2.97 (ddd, *J* = 12.9, 11.6, 2.5 Hz, 1 H), 2.80 (dd, *J* = 13.2, 10.5 Hz, 1 H), 2.71 (ddd, *J* = 13.4, 11.7, 3.0 Hz, 1 H), 2.40 (dt, *J* = 13.2, 2.1 Hz, 1 H), 2.32 (dq, *J* = 13.3, 2.5 Hz, 1 H), 2.03 (br, 1 H).

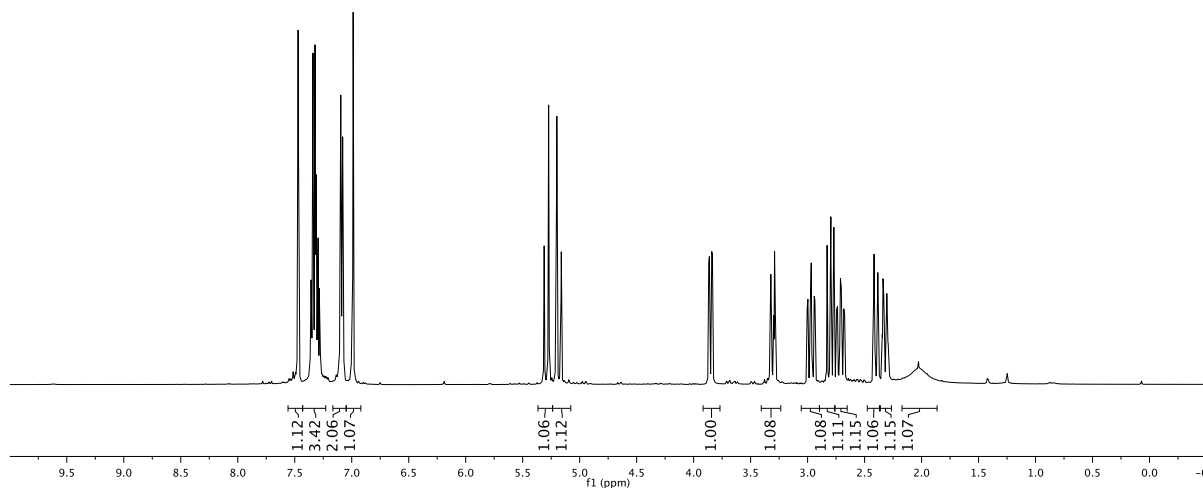

56-02-01-bhsieh.11.fid  
Sample fly-08-144-CC-6-im8n  
group bode  
CAR CDCl<sub>3</sub> /opt/v bhsieh 56

138.4  
136.5  
133.3  
129.1  
128.2  
126.8  
136.7

52.8  
48.9  
48.1  
31.9  
27.3

<sup>13</sup>C NMR (101 MHz, CDCl<sub>3</sub>) δ 138.4, 136.5, 133.5, 129.1, 128.2, 126.8, 126.7, 52.8, 48.9, 48.1, 31.9, 27.3.

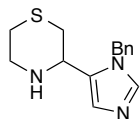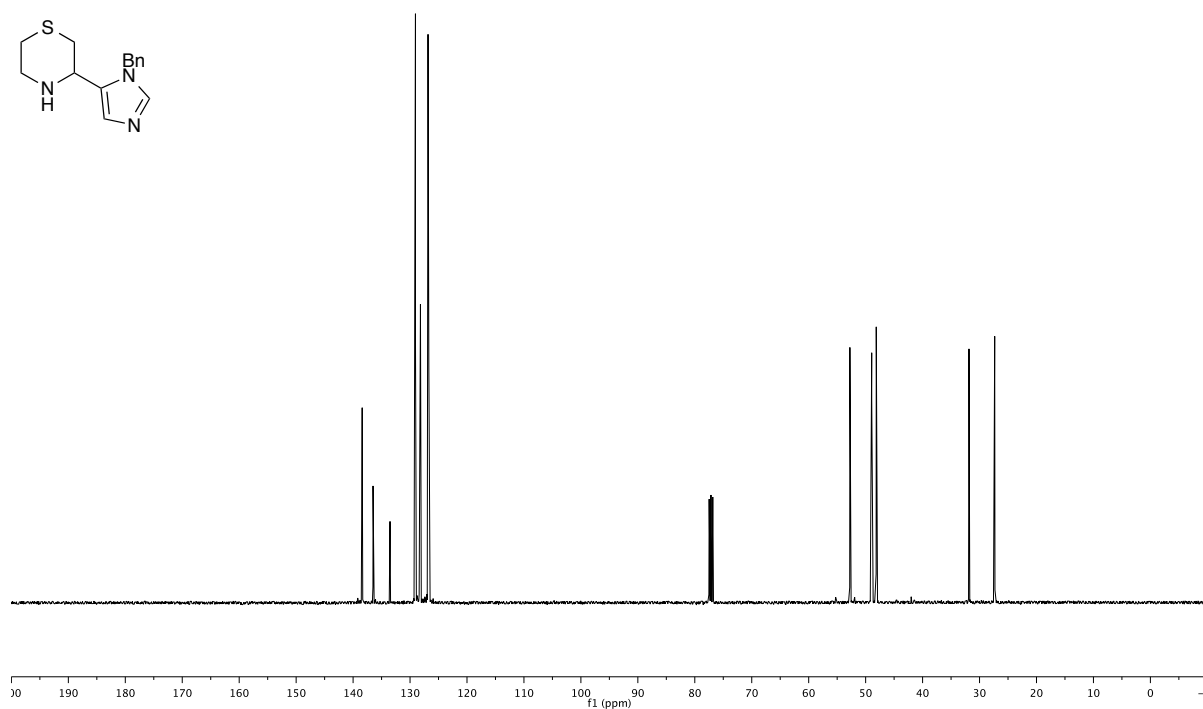

6-Phenyl-5-(thiomorpholin-3-yl)-2,3-dihydroimidazo[2,1-*b*]thiazole (6n) (Scheme 3)

2-03-01-bhsieh.10.fid  
Sample fly-08-150-CC-6-Phimidazoethiazole  
group bode

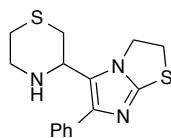

<sup>1</sup>H NMR (400 MHz, CDCl<sub>3</sub>) δ 7.50, 7.50, 7.49, 7.48, 7.48, 7.48, 7.47, 7.41, 7.40, 7.39, 7.38, 7.37, 7.37, 7.36, 7.31, 7.30, 7.30, 7.29, 7.29, 7.28, 7.27, 7.27, 4.61, 4.60, 4.59, 4.58, 4.58, 4.57, 4.57, 4.55, 4.34, 4.34, 4.31, 4.31, 4.26, 4.24, 4.24, 4.23, 4.22, 4.20, 3.83, 3.81, 3.80, 3.79, 3.78, 3.76, 3.76, 3.75, 3.74, 3.73, 3.73, 3.72, 3.37, 3.36, 3.35, 3.34, 3.33, 3.32, 3.08, 3.07, 3.05, 3.05, 3.02, 3.02, 3.01, 2.98, 2.97, 2.95, 2.88, 2.88, 2.85, 2.85, 2.85, 2.84, 2.82, 2.81, 2.55, 2.55, 2.54, 2.52, 2.51, 2.51, 2.43, 2.42, 2.42, 2.41, 2.40, 2.39, 2.38, 2.38, 1.99.

<sup>1</sup>H NMR (400 MHz, Chloroform-*d*) δ 7.54–7.45 (m, 2 H), 7.39 (dd, *J* = 8.5, 6.9 Hz, 2 H), 7.32–7.22 (m, 1 H), 4.58 (ddd, *J* = 11.1, 7.5, 6.1 Hz, 1 H), 4.32 (dd, *J* = 11.0, 2.4 Hz, 1 H), 4.23 (dt, *J* = 11.1, 7.6 Hz, 1 H), 3.87–3.70 (m, 2 H), 3.35 (dt, *J* = 11.8, 3.1 Hz, 1 H), 3.05 (td, *J* = 11.7, 2.2 Hz, 1 H), 2.98 (dd, *J* = 13.1, 10.9 Hz, 1 H), 2.85 (ddd, *J* = 13.1, 11.7, 2.9 Hz, 1 H), 2.53 (dt, *J* = 13.1, 2.3 Hz, 1 H), 2.40 (dq, *J* = 13.2, 2.5 Hz, 1 H), 1.99 (br, 1 H).

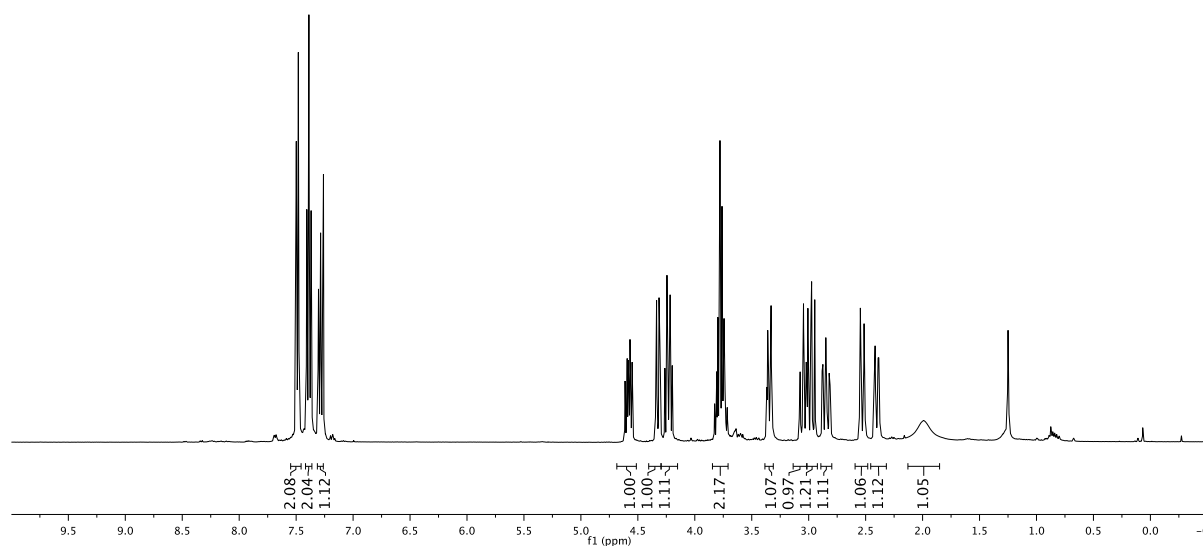

2-03-01-bhsieh.12.fid  
Sample fly-08-150-CC-6-Phimidazoethiazole  
group bode

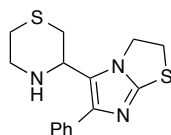

<sup>13</sup>C NMR (101 MHz, CDCl<sub>3</sub>) δ 149.9, 143.7, 134.6, 128.6, 128.3, 127.9, 127.1, 53.9, 49.2, 47.8, 35.1, 32.2, 27.6.

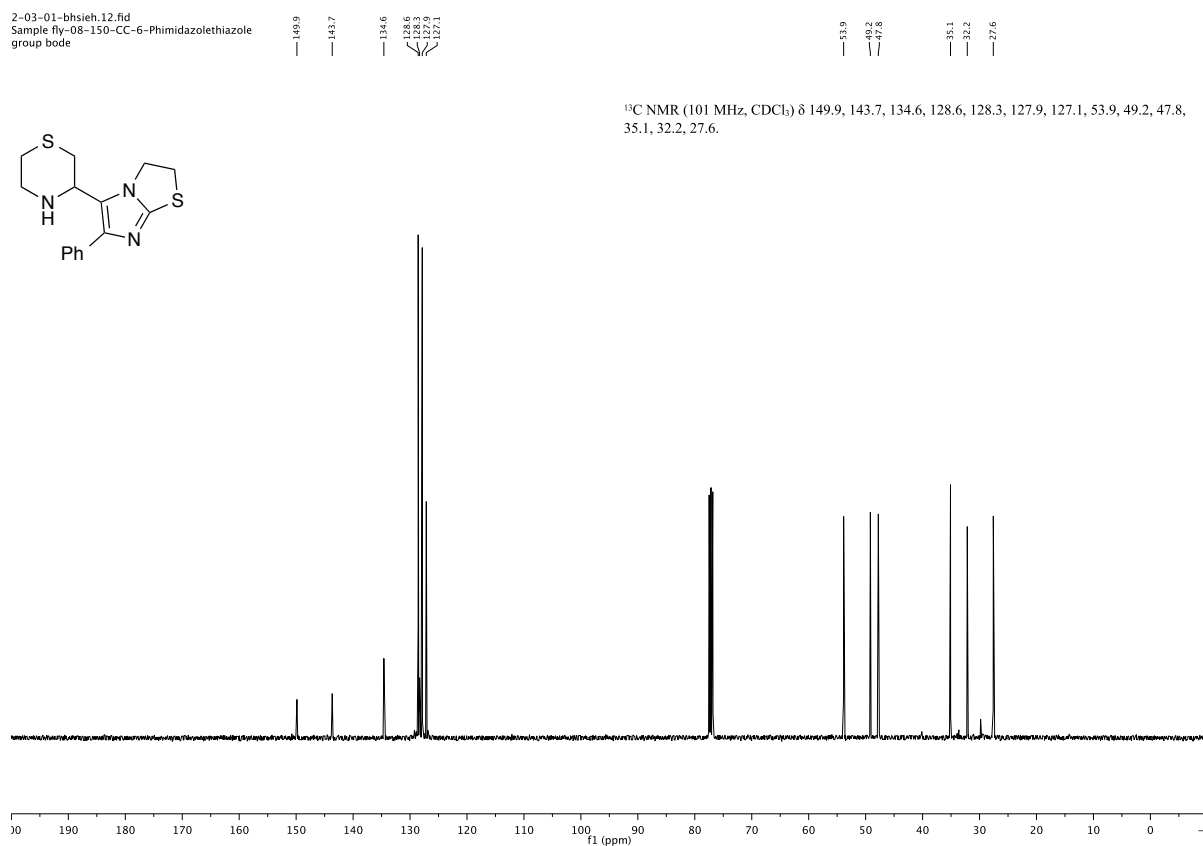



3-(1-Methyl-1*H*-imidazol-2-yl)thiomorpholine (60) (Scheme 3)

4-03-01-bhsieh.20.fid  
Sample fly-09-003-CC-6-2im3Me  
group bode

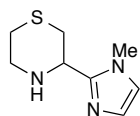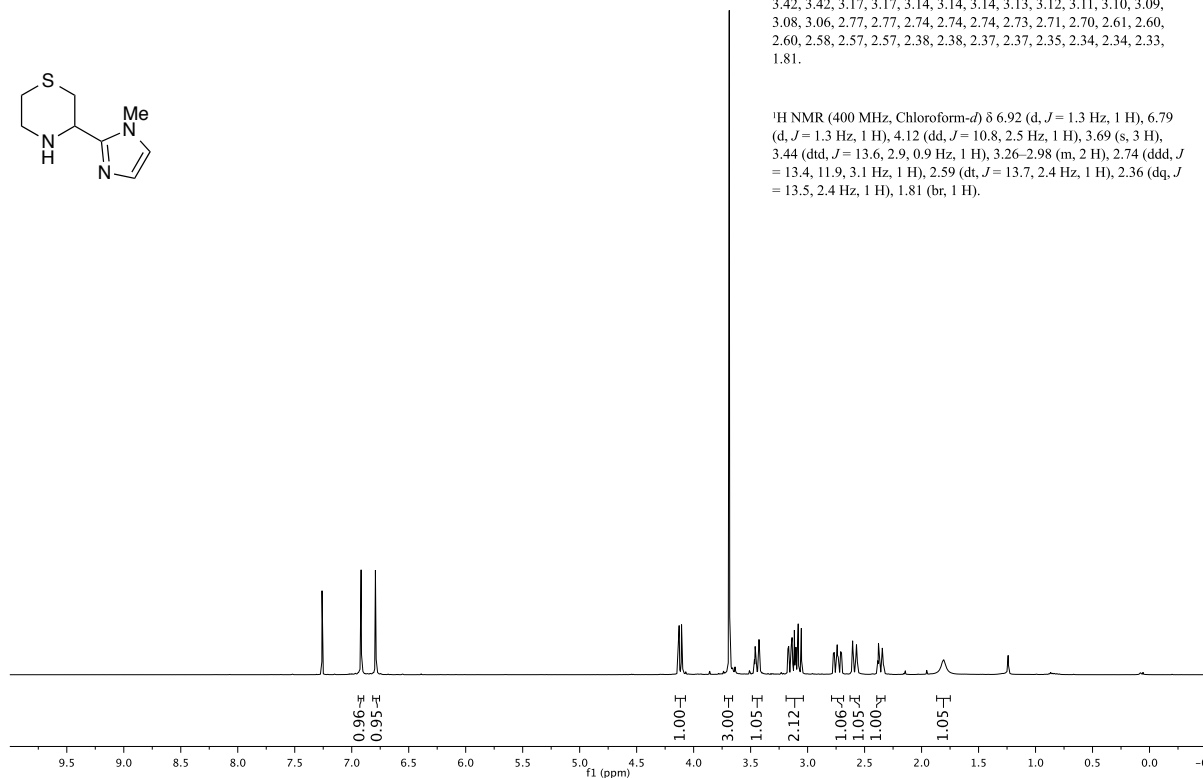

4-03-01-bhsieh.22.fid  
Sample fly-09-003-CC-6-2im3Me  
group bode

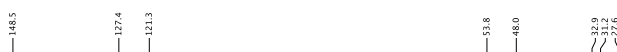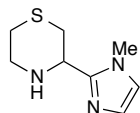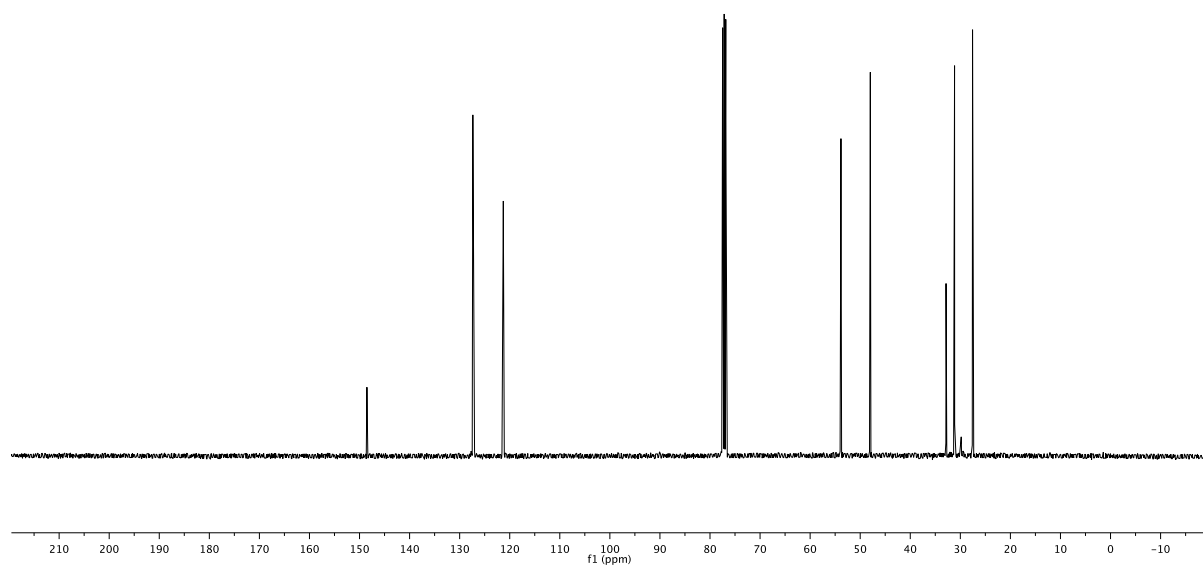

## 3-(Thiazol-5-yl)thiomorpholine (6p) (Scheme 3)

42-16-02-bhsieh.10.fid  
Sample fly-08-156-CC  
group bode

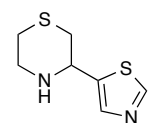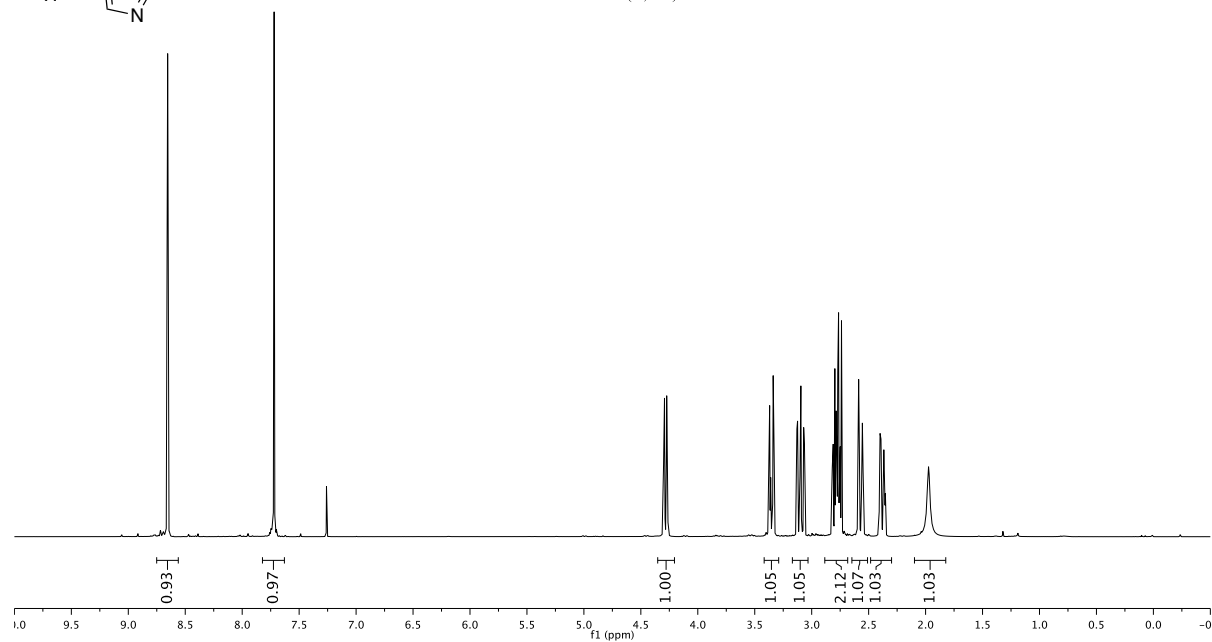

$^1\text{H NMR}$  (400 MHz,  $\text{CDCl}_3$ )  $\delta$  8.66, 8.65, 7.72, 7.72, 7.72, 4.30, 4.29, 4.27, 4.27, 3.38, 3.37, 3.36, 3.35, 3.34, 3.33, 3.13, 3.12, 3.10, 3.10, 3.10, 3.09, 3.07, 3.06, 2.82, 2.81, 2.80, 2.79, 2.79, 2.78, 2.78, 2.77, 2.76, 2.76, 2.75, 2.74, 2.59, 2.59, 2.58, 2.56, 2.55, 2.55, 2.41, 2.40, 2.40, 2.39, 2.39, 2.39, 2.37, 2.37, 2.36, 2.36, 2.36, 2.35, 1.97.

$^1\text{H NMR}$  (400 MHz, Chloroform-*d*)  $\delta$  8.65 (d,  $J = 0.7$  Hz, 1 H), 7.78 – 7.64 (m, 1 H), 4.28 (dd,  $J = 10.2, 2.5$  Hz, 1 H), 3.35 (dt,  $J = 12.4, 3.2$  Hz, 1 H), 3.10 (ddd,  $J = 12.5, 11.4, 2.5$  Hz, 1 H), 2.86–2.68 (m, 2 H), 2.57 (dt,  $J = 13.1, 2.2$  Hz, 1 H), 2.38 (ddt,  $J = 13.3, 3.3, 2.2$  Hz, 1 H), 1.97 (br, 1 H).

42-16-02-bhsieh.11.fid  
Sample fly-08-156-CC  
group bode

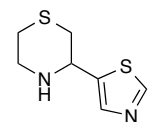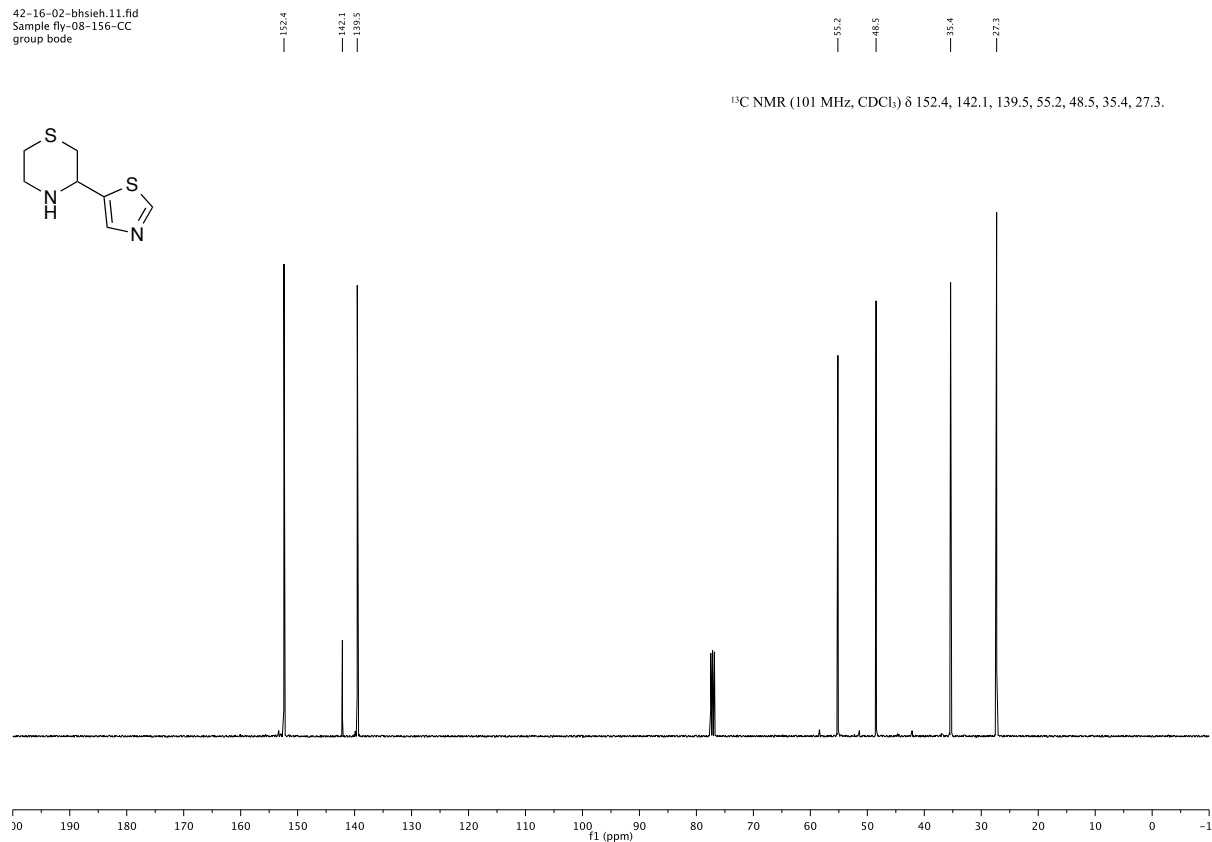

$^{13}\text{C NMR}$  (101 MHz,  $\text{CDCl}_3$ )  $\delta$  152.4, 142.1, 139.5, 55.2, 48.5, 35.4, 27.3.

## 3-(Thiazol-4-yl)thiomorpholine (6q) (Scheme 3)

3-26-12-bhsieh.10.fid  
Sample fly-09-011-CC-6-NCSC  
group bode

<sup>1</sup>H NMR (400 MHz, CDCl<sub>3</sub>) δ 8.77, 8.76, 7.21, 7.21, 7.20, 7.20, 4.26, 4.26, 4.25, 4.25, 4.24, 4.23, 4.23, 4.23, 3.47, 3.46, 3.46, 3.44, 3.43, 3.43, 3.22, 3.21, 3.19, 3.19, 3.18, 3.16, 3.15, 2.92, 2.90, 2.89, 2.88, 2.87, 2.86, 2.85, 2.85, 2.84, 2.84, 2.82, 2.81, 2.80, 2.80, 2.78, 2.77, 2.76, 2.47, 2.47, 2.46, 2.46, 2.46, 2.45, 2.44, 2.43, 2.43, 2.43, 2.42, 2.42, 2.22.

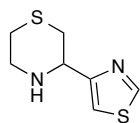

<sup>1</sup>H NMR (400 MHz, Chloroform-*d*) δ 8.76 (d, *J* = 2.0 Hz, 1 H), 7.21 (dd, *J* = 2.0, 0.8 Hz, 1 H), 4.24 (ddd, *J* = 10.1, 2.7, 0.8 Hz, 1 H), 3.45 (dt, *J* = 12.6, 3.2 Hz, 1 H), 3.19 (ddd, *J* = 12.5, 11.5, 2.5 Hz, 1 H), 2.99-2.71 (m, 4 H), 2.45 (ddt, *J* = 13.3, 3.1, 2.2 Hz, 1 H), 2.22 (br, 1 H).

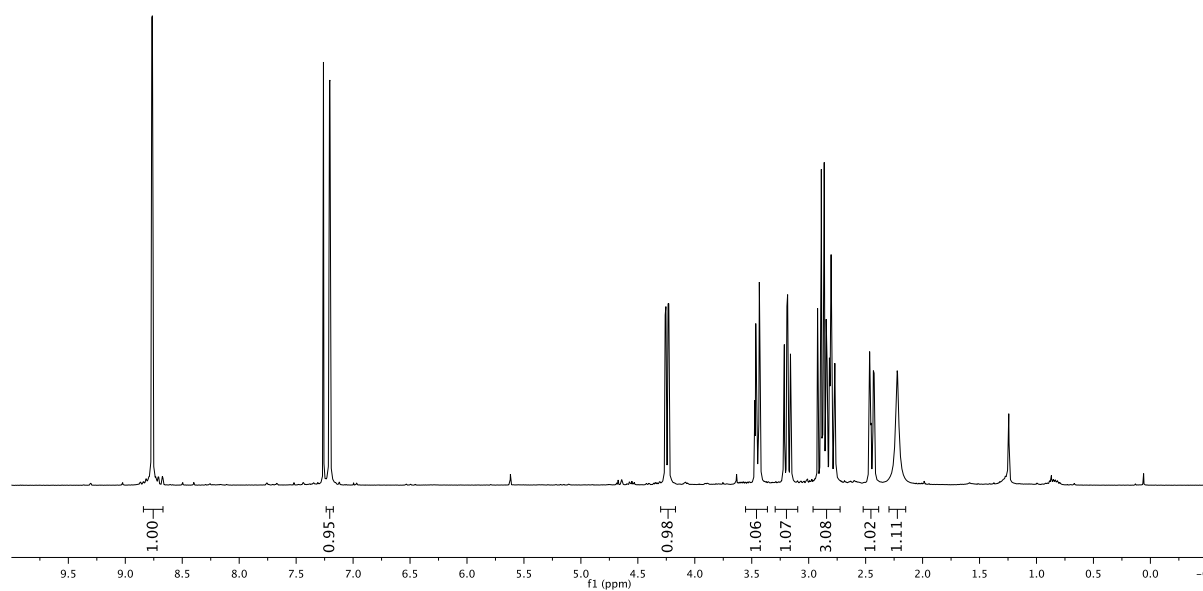

3-26-12-bhsieh.11.fid  
Sample fly-09-011-CC-6-NCSC  
group bode

159.4 153.1 113.5 58.0 48.4 32.9 27.7

<sup>13</sup>C NMR (101 MHz, CDCl<sub>3</sub>) δ 159.4, 153.1, 113.5, 58.0, 48.4, 32.9, 27.7.

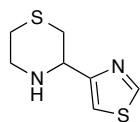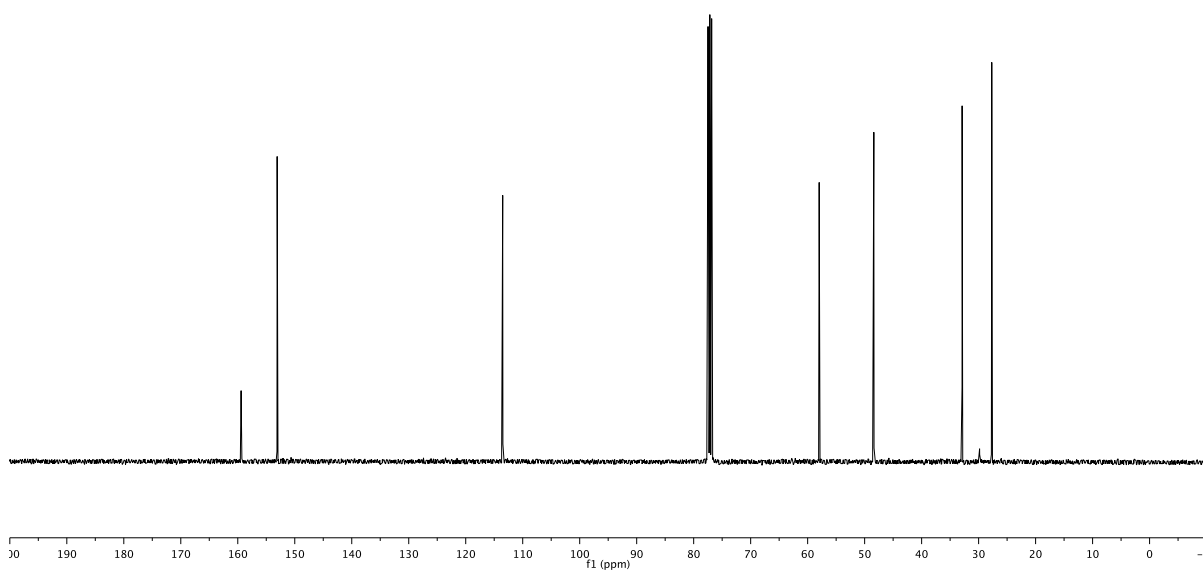

## 5-Methyl-3-(thiomorpholin-3-yl)isoxazole (6r) (Scheme 3)

35-15-02-bhsieh3.10.fid  
Sample fly-08-147-CC  
group bode  
PRO CDCl<sub>3</sub> /opt/v bhsieh 38

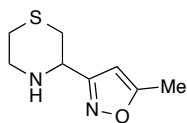

<sup>1</sup>H NMR (400 MHz, CDCl<sub>3</sub>) δ 5.92, 5.92, 5.92, 4.10, 4.09, 4.09, 4.07, 4.07, 4.06, 3.37, 3.36, 3.36, 3.35, 3.34, 3.33, 3.32, 3.32, 3.10, 3.09, 3.09, 3.07, 3.07, 3.06, 3.06, 3.04, 3.04, 3.03, 2.82, 2.81, 2.79, 2.79, 2.78, 2.78, 2.76, 2.75, 2.75, 2.73, 2.72, 2.72, 2.72, 2.60, 2.60, 2.59, 2.59, 2.57, 2.57, 2.56, 2.56, 2.40, 2.39, 2.39, 2.38, 2.38, 2.37, 2.36, 2.36, 2.35, 2.35, 2.34, 2.34, 2.33, 2.01.

<sup>1</sup>H NMR (400 MHz, Chloroform-*d*) δ 5.92 (s, 1 H), 4.08 (dt, *J* = 10.4, 2.1 Hz, 1 H), 3.34 (dt, *J* = 12.5, 3.1 Hz, 1 H), 3.14–3.01 (m, 1 H), 2.77 (tdd, *J* = 14.4, 10.8, 2.3 Hz, 2 H), 2.58 (dq, *J* = 13.2, 2.0 Hz, 1 H), 2.37 (ddd, *J* = 11.4, 3.9, 1.9 Hz, 1 H), 2.34 (s, 2 H), 2.01 (s, 1 H).

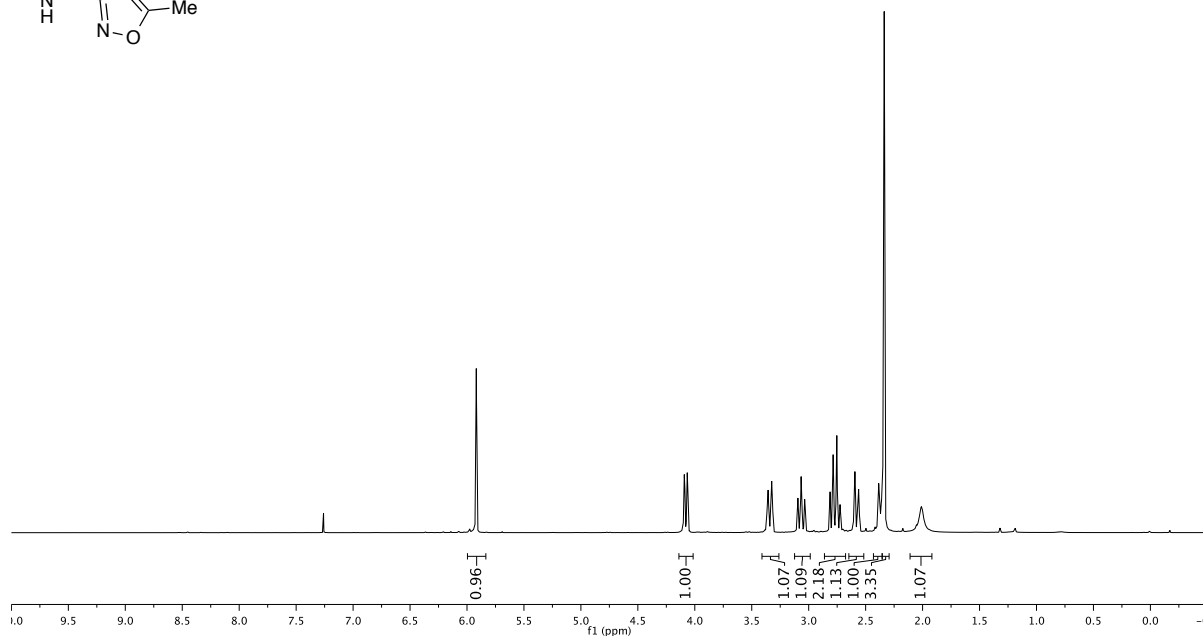

35-15-02-bhsieh3.11.fid  
Sample fly-08-147-CC  
group bode  
CAR CDCl<sub>3</sub> /opt/v bhsieh 38

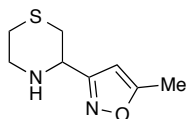

<sup>13</sup>C NMR (101 MHz, CDCl<sub>3</sub>) δ 169.6, 165.5, 99.6, 54.2, 47.8, 32.1, 27.4, 12.3.

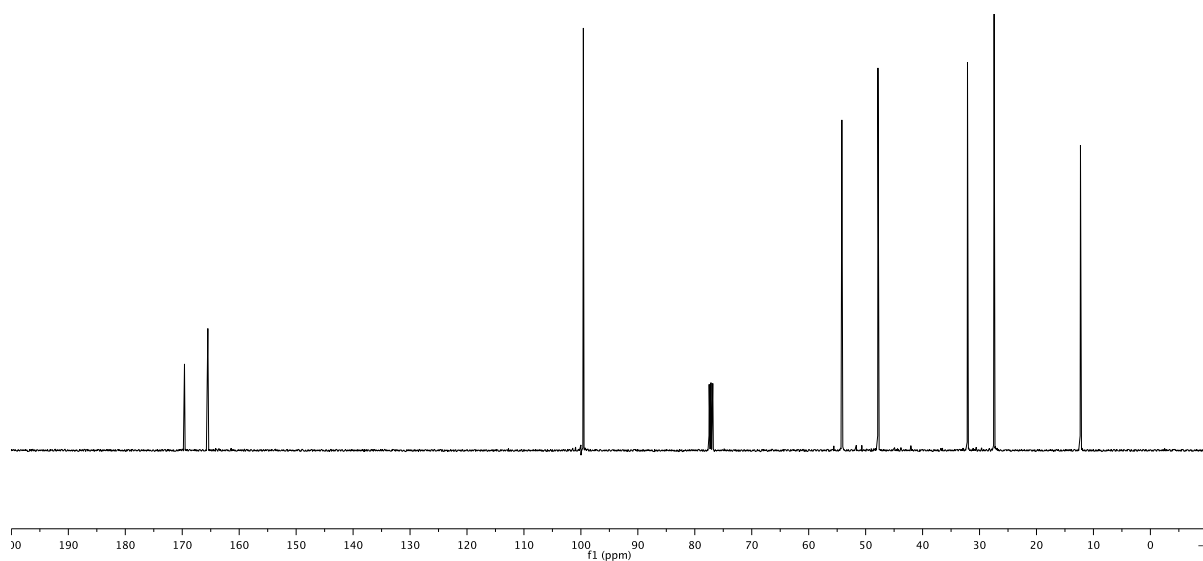

## 3-Phenyl-5-(thiomorpholin-3-yl)isoxazole (6s) (Scheme 3)

44-16-02-bhsieh.10.fid  
Sample fly-09-016-CC  
group bode

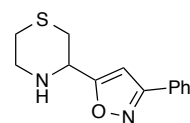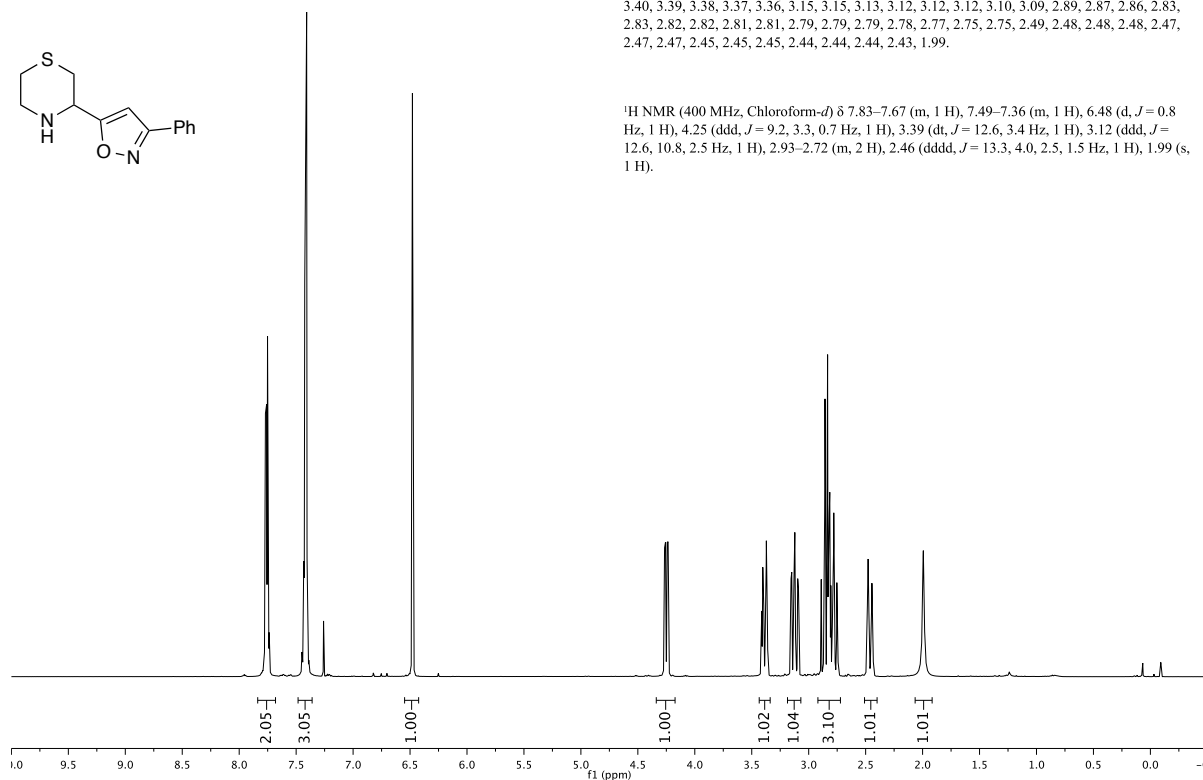

44-16-02-bhsieh.11.fid  
Sample fly-09-016-CC  
group bode

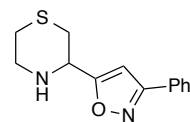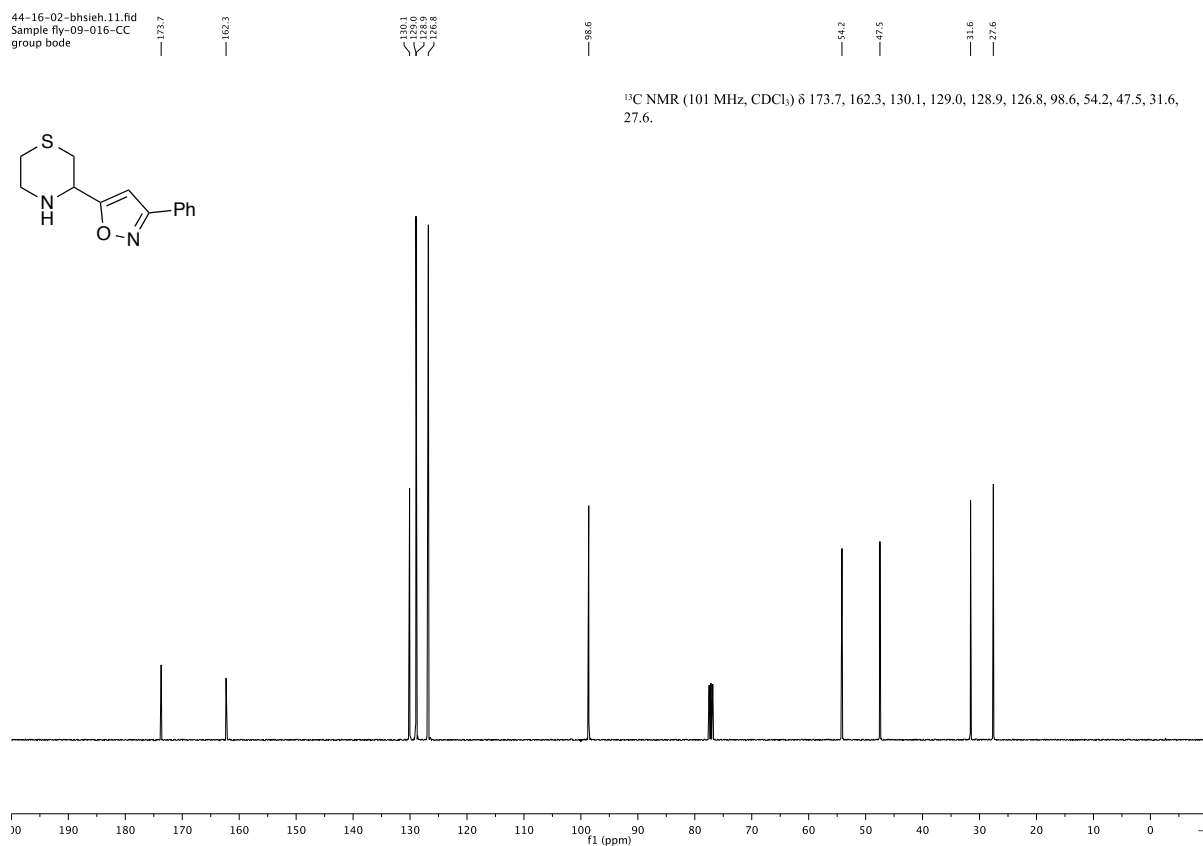

## 3-(Quinolin-8-yl)thiomorpholine (6t) (Scheme 3)

20-25-07-bhsieh.10.fid  
Sample fly-08-141-2-CC  
group bode  
PRO CDCl<sub>3</sub> /opt/v bhsieh 20

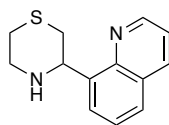

<sup>1</sup>H NMR (400 MHz, CDCl<sub>3</sub>) δ 8.88, 8.88, 8.87, 8.87, 8.10, 8.10, 8.09, 8.08, 8.08, 7.74, 7.74, 7.72, 7.72, 7.69, 7.69, 7.67, 7.67, 7.50, 7.48, 7.47, 7.46, 7.45, 7.45, 7.38, 7.37, 7.37, 7.36, 7.36, 7.35, 7.34, 5.02, 5.01, 4.99, 4.99, 3.49, 3.48, 3.47, 3.47, 3.46, 3.45, 3.43, 3.25, 3.25, 3.24, 3.23, 3.22, 3.22, 3.21, 3.20, 3.19, 3.19, 3.19, 3.18, 3.11, 3.10, 3.10, 3.08, 3.08, 3.07, 3.07, 3.06, 3.05, 3.04, 3.04, 2.97, 2.96, 2.95, 2.95, 2.94, 2.93, 2.93, 2.92, 2.92, 2.91, 2.90, 2.90, 2.89, 2.74, 2.73, 2.72, 2.72, 2.70, 2.70, 2.69, 2.68, 2.45, 2.45, 2.44, 2.43, 2.43, 2.42, 2.41.

<sup>1</sup>H NMR (400 MHz, Chloroform-*d*) δ 8.87 (dd, *J* = 4.2, 1.8 Hz, 1 H), 8.09 (dd, *J* = 8.3, 1.8 Hz, 1 H), 7.73 (dd, *J* = 7.1, 1.5 Hz, 1 H), 7.68 (dd, *J* = 8.1, 1.5 Hz, 1 H), 7.50–7.45 (m, 1 H), 7.38–7.34 (m, 1 H), 5.00 (dd, *J* = 10.5, 2.3 Hz, 1 H), 3.49–3.43 (m, 1 H), 3.25–3.18 (m, 1 H), 3.11–3.04 (m, 2 H), 2.97–2.89 (m, 1 H), 2.74–2.68 (m, 1 H), 2.45–2.41 (m, 1 H).

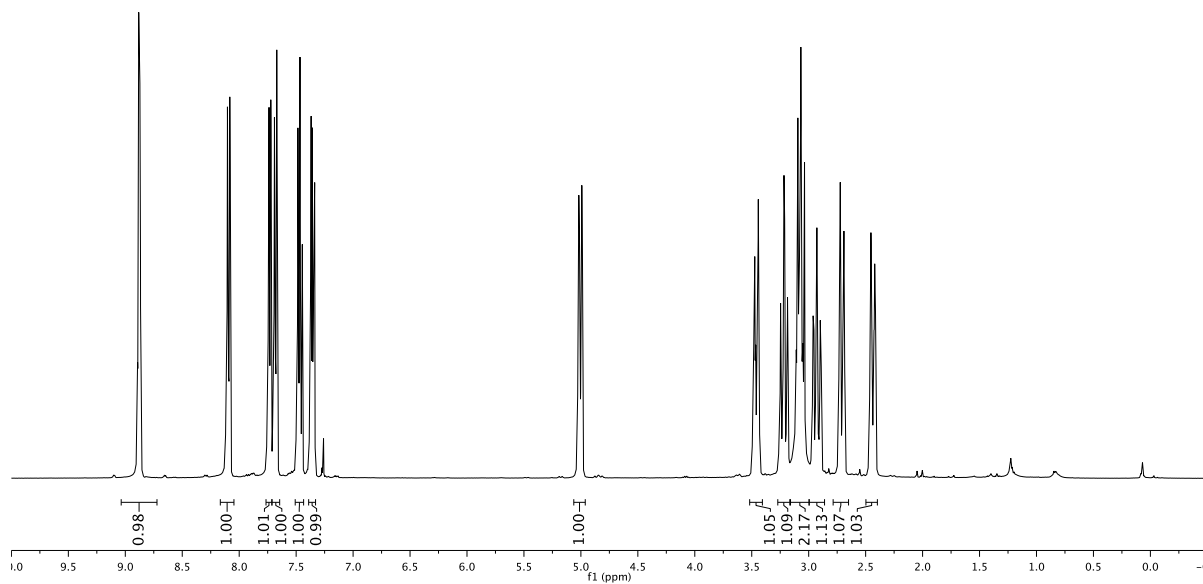

20-25-07-bhsieh.11.fid  
Sample fly-08-141-2-CC  
group bode  
CAR CDCl<sub>3</sub> /opt/v bhsieh 20

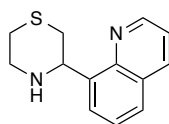

<sup>13</sup>C NMR (101 MHz, CDCl<sub>3</sub>) δ 149.4, 145.7, 141.4, 136.4, 128.4, 127.4, 126.7, 126.4, 121.1, 58.2, 48.9, 33.3, 27.5.

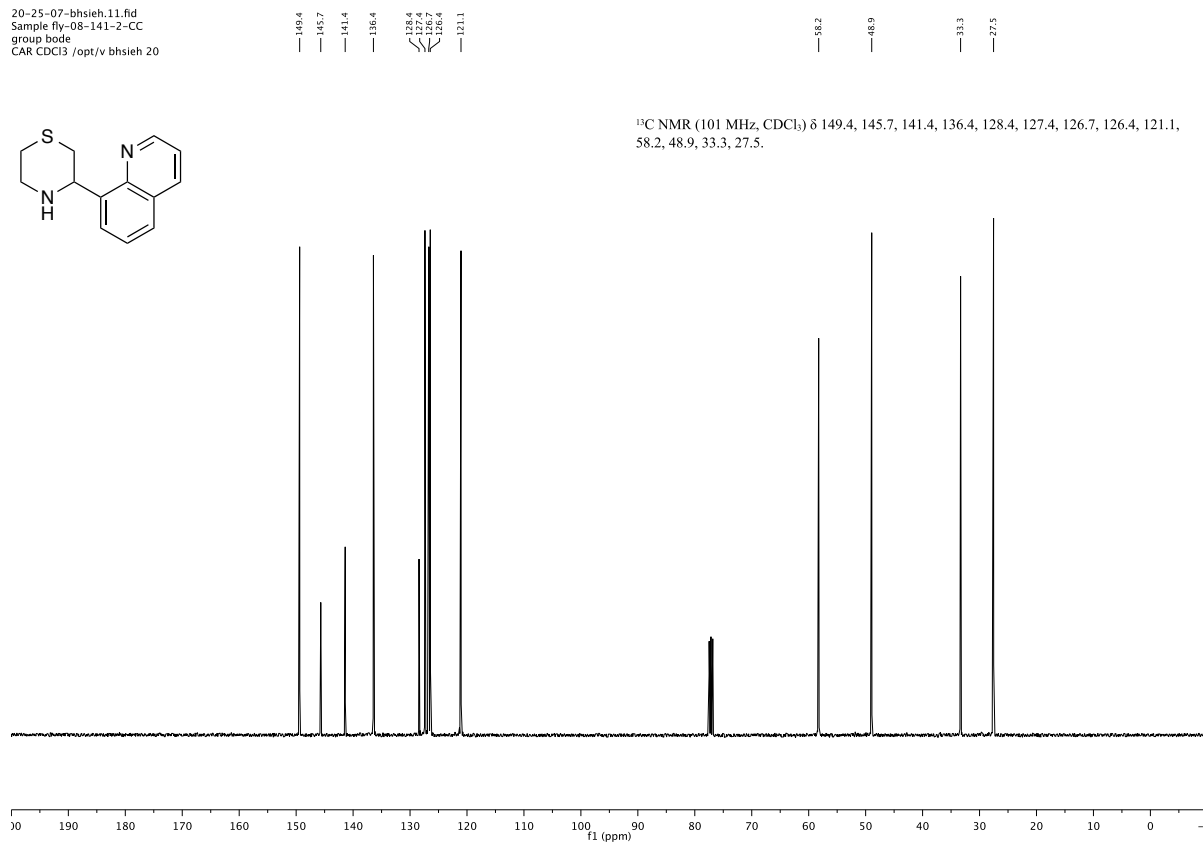

3-(Pyrazolo[1,5-*a*]pyridin-7-yl)thiomorpholine (6u) (Scheme 3)

41-15-02-bhsieh.50.fid  
Sample fly-09-032-CC  
group bode

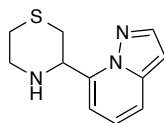

<sup>1</sup>H NMR (400 MHz, CDCl<sub>3</sub>) δ 7.95, 7.94, 7.94, 7.47, 7.47, 7.46, 7.45, 7.44, 7.44, 7.43, 7.09, 7.09, 7.08, 7.07, 7.07, 7.06, 7.06, 7.05, 7.05, 7.04, 6.83, 6.82, 6.81, 6.80, 6.52, 6.52, 6.51, 6.51, 4.79, 4.79, 4.78, 4.77, 4.76, 4.76, 3.47, 3.46, 3.45, 3.44, 3.43, 3.42, 3.41, 3.28, 3.27, 3.27, 3.26, 3.25, 3.24, 3.24, 3.23, 3.22, 3.21, 3.21, 3.20, 3.02, 3.01, 3.01, 2.99, 2.98, 2.98, 2.97, 2.96, 2.96, 2.95, 2.95, 2.94, 2.93, 2.92, 2.92, 2.90, 2.90, 2.90, 2.89, 2.89, 2.88, 2.87, 2.86, 2.85, 2.64, 2.51, 2.50, 2.50, 2.49, 2.49, 2.47, 2.46, 2.46, 2.46, 2.45, 2.45.

<sup>1</sup>H NMR (400 MHz, Chloroform-*d*) δ 7.95 (d, *J* = 2.2 Hz, 1 H), 7.45 (dt, *J* = 8.8, 1.8 Hz, 1 H), 7.07 (ddt, *J* = 8.8, 6.8, 1.8 Hz, 1 H), 6.81 (dd, *J* = 7.1, 2.3 Hz, 1 H), 6.51 (q, *J* = 2.1 Hz, 1 H), 4.77 (dt, *J* = 9.2, 2.9 Hz, 1 H), 3.44 (dt, *J* = 12.4, 3.3 Hz, 1 H), 3.24 (tq, *J* = 12.2, 2.3 Hz, 1 H), 3.09–2.80 (m, 3 H), 2.64 (br, 1 H), 2.48 (ddt, *J* = 14.9, 3.7, 1.9 Hz, 1 H).

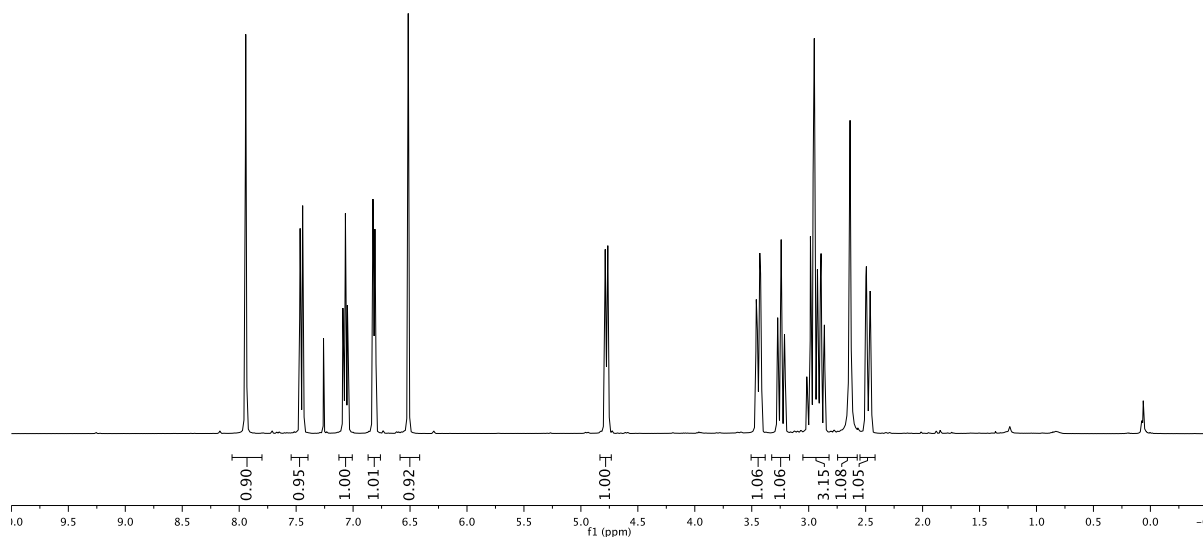

41-15-02-bhsieh.51.fid  
Sample fly-09-032-CC  
group bode

142.0  
141.2  
140.6  
123.2  
117.0  
108.4  
97.1  
57.0  
48.5  
30.7  
27.8

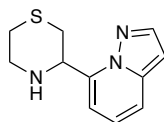

<sup>13</sup>C NMR (101 MHz, CDCl<sub>3</sub>) δ 142.0, 141.2, 140.6, 123.2, 117.0, 108.4, 97.1, 57.0, 48.5, 30.7, 27.8.

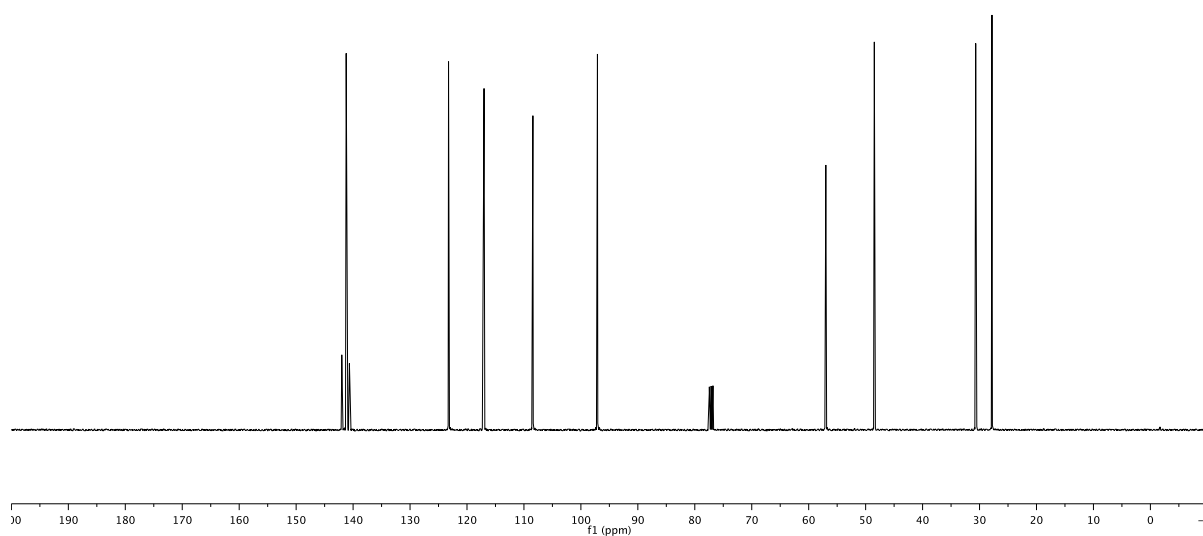

***trans*-3-(Pyridin-2-yl)-2-(trimethylsilyl)thiomorpholine (7d) (Scheme 3)**

51-28-07-bhsieh.10.fid  
Sample fly-08-108-CC  
group bode

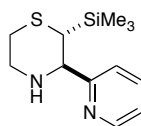

$^1\text{H NMR}$  (400 MHz,  $\text{CDCl}_3$ )  $\delta$  8.55, 8.55, 8.55, 8.55, 8.54, 8.54, 8.54, 8.53, 7.66, 7.66, 7.64, 7.64, 7.62, 7.62, 7.30, 7.30, 7.30, 7.28, 7.28, 7.28, 7.21, 7.20, 7.19, 7.19, 7.19, 7.18, 7.17, 7.17, 4.03, 4.00, 3.46, 3.46, 3.45, 3.43, 3.42, 3.42, 3.19, 3.18, 3.16, 3.15, 3.15, 3.15, 3.12, 2.90, 2.89, 2.87, 2.87, 2.86, 2.86, 2.84, 2.83, 2.73, 2.71, 2.41, 2.41, 2.40, 2.38, 2.37, 2.37, 2.27, -0.28.

$^1\text{H NMR}$  (400 MHz,  $\text{Chloroform-}d$ )  $\delta$  8.54 (ddd,  $J = 4.8, 1.8, 1.1$  Hz, 1 H), 7.64 (td,  $J = 7.7, 1.8$  Hz, 1 H), 7.29 (dt,  $J = 7.7, 1.1$  Hz, 1 H), 7.19 (ddd,  $J = 7.7, 4.8, 1.1$  Hz, 1 H), 4.01 (d,  $J = 10.3$  Hz, 1 H), 3.44 (dt,  $J = 13.1, 3.0$  Hz, 1 H), 3.15 (ddd,  $J = 13.1, 12.1, 2.6$  Hz, 1 H), 2.86 (ddd,  $J = 13.1, 12.1, 3.0$  Hz, 1 H), 2.72 (d,  $J = 10.3$  Hz, 1 H), 2.39 (dt,  $J = 13.1, 2.6$  Hz, 1 H), 2.27 (br, 1 H), -0.28 (s, 9 H).

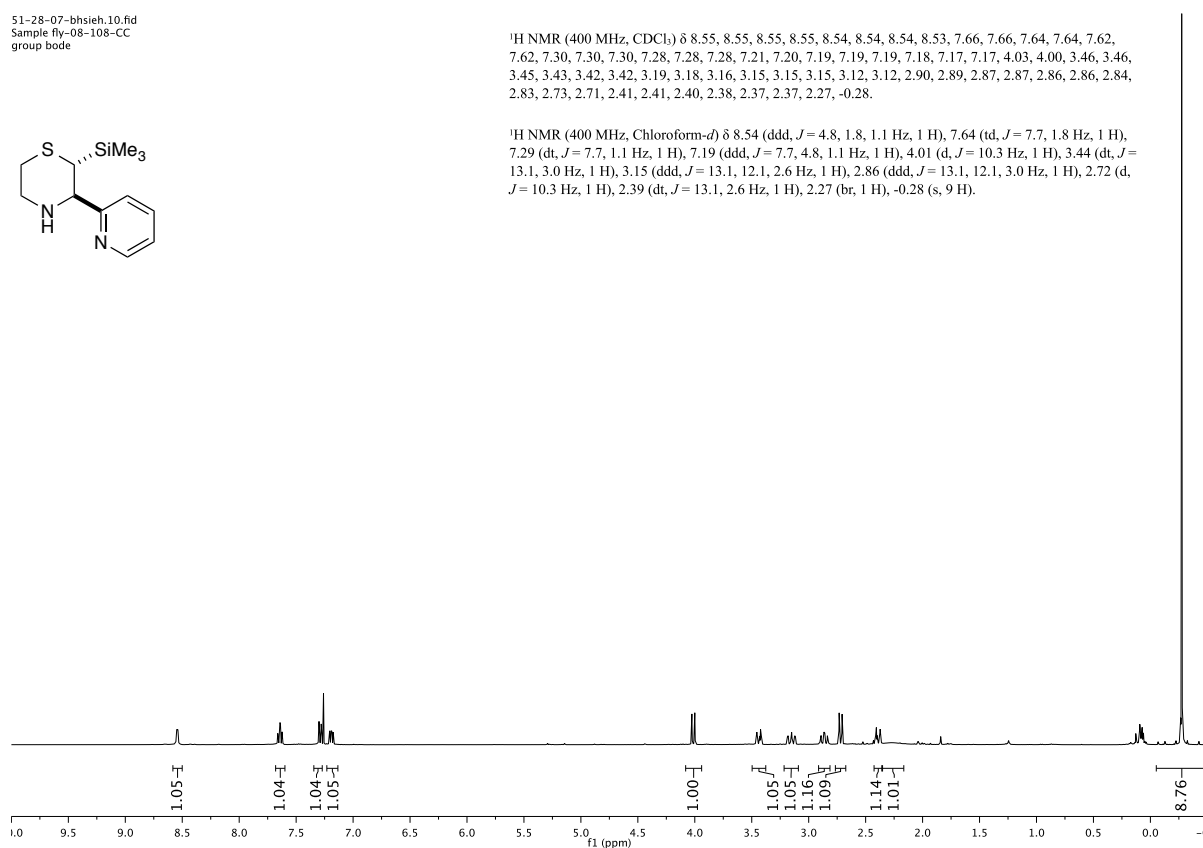

51-28-07-bhsieh.11.fid  
Sample fly-08-108-CC  
group bode

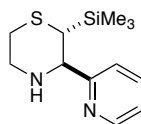

149.7  
137.0  
123.2  
123.0  
65.4  
47.9  
32.9  
28.5  
-2.5

$^{13}\text{C NMR}$  (101 MHz,  $\text{CDCl}_3$ )  $\delta$  149.7, 137.0, 123.2, 123.0, 65.4, 47.9, 32.9, 28.5, -2.5.

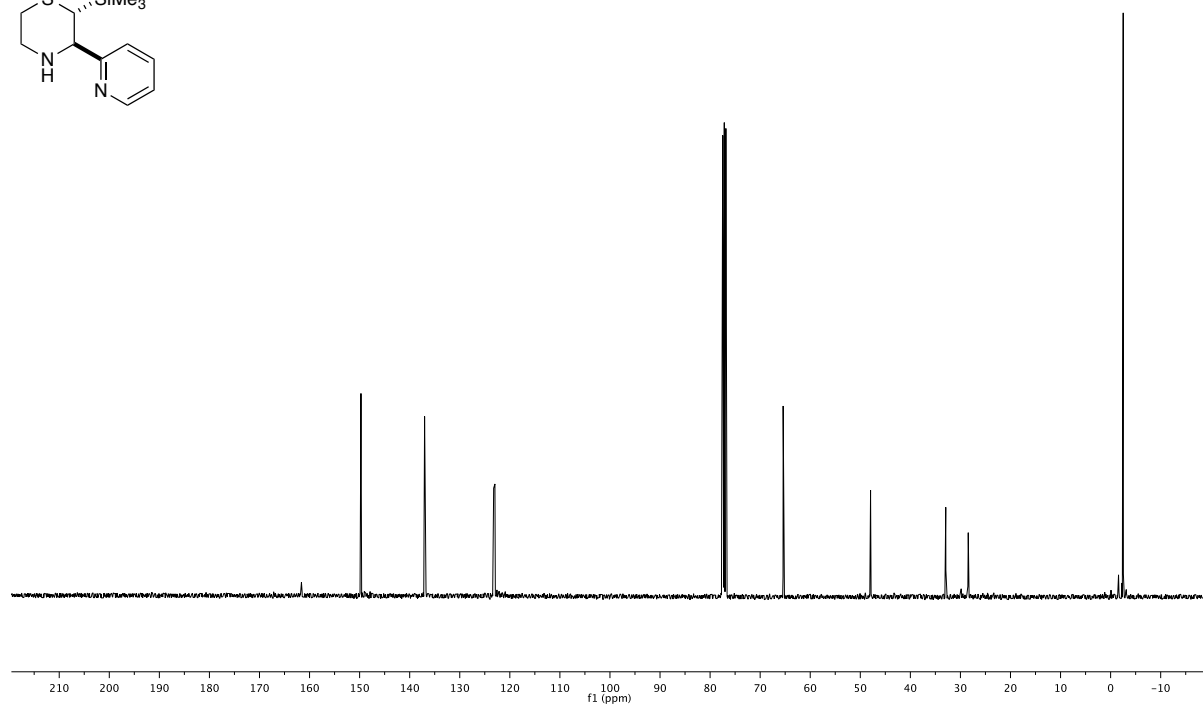



## 3-(Quinolin-3-yl)-1,4-thiazepane (8d) (Scheme 3)

11-06-01-bhsieh.10.fid  
Sample fly-08-118-CC-7-3quinoline  
group bode

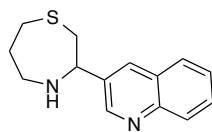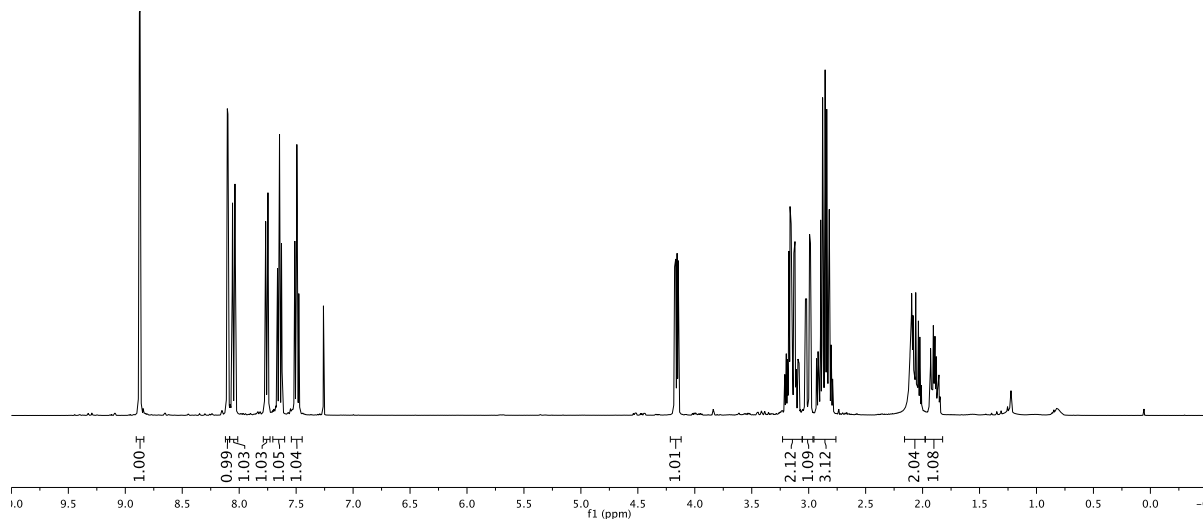

11-06-01-bhsieh.11.fid  
Sample fly-08-118-CC-7-3quinoline  
group bode

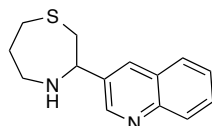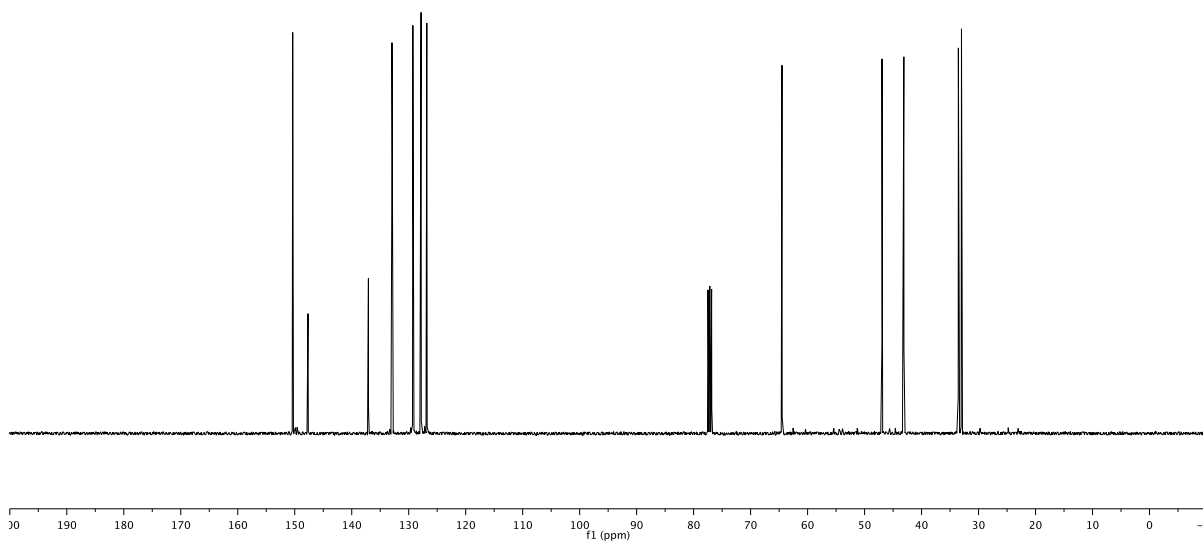

<sup>1</sup>H NMR (400 MHz, CDCl<sub>3</sub>) δ 8.88, 8.88, 8.87, 8.10, 8.10, 8.10, 8.06, 8.06, 8.06, 8.04, 8.04, 8.04, 8.03, 7.77, 7.77, 7.75, 7.75, 7.67, 7.66, 7.65, 7.65, 7.64, 7.63, 7.62, 7.51, 7.51, 7.50, 7.49, 7.49, 7.48, 7.47, 4.18, 4.18, 4.17, 4.17, 4.16, 4.15, 4.15, 4.14, 3.21, 3.20, 3.20, 3.19, 3.17, 3.16, 3.16, 3.15, 3.15, 3.14, 3.13, 3.12, 3.11, 3.09, 3.08, 3.03, 3.03, 3.02, 3.02, 2.99, 2.99, 2.98, 2.98, 2.93, 2.92, 2.91, 2.89, 2.88, 2.88, 2.87, 2.86, 2.85, 2.84, 2.84, 2.83, 2.82, 2.82, 2.81, 2.81, 2.80, 2.80, 2.79, 2.79, 2.10, 2.10, 2.08, 2.07, 2.07, 2.06, 2.05, 2.04, 2.02, 2.01, 1.94, 1.93, 1.92, 1.92, 1.91, 1.91, 1.90, 1.90, 1.89, 1.88, 1.88, 1.88, 1.87, 1.87, 1.87, 1.86, 1.86, 1.85.

<sup>1</sup>H NMR (400 MHz, Chloroform-*d*) δ 8.87 (d, *J* = 2.2 Hz, 1 H), 8.10 (d, *J* = 2.1 Hz, 1 H), 8.05 (dq, *J* = 8.5, 0.9 Hz, 1 H), 7.76 (dd, *J* = 8.2, 1.4 Hz, 1 H), 7.65 (ddd, *J* = 8.4, 6.9, 1.5 Hz, 1 H), 7.49 (ddd, *J* = 8.1, 6.9, 1.2 Hz, 1 H), 4.16 (ddd, *J* = 8.9, 3.9, 0.7 Hz, 1 H), 3.23–3.07 (m, 2 H), 3.01 (ddd, *J* = 14.5, 4.0, 1.0 Hz, 1 H), 2.95–2.73 (m, 3 H), 2.06 (dtd, *J* = 19.7, 10.3, 9.2, 4.3 Hz, 2 H), 1.96–1.81 (m, 1 H).

<sup>13</sup>C NMR (101 MHz, CDCl<sub>3</sub>) δ 150.4, 147.7, 137.1, 132.9, 129.3, 129.2, 128.0, 127.8, 126.8, 64.5, 46.9, 43.1, 33.5, 33.0.

## 3-(2-Methyl-2H-indazol-3-yl)-1,4-thiazepane (8e) (Scheme 3)

27-05-01-bhsieh.10.fid  
Sample fly-08-152-CC-7-2Meindazole  
group bode  
PRO CDCl3 /opt/v bhsieh 27

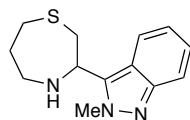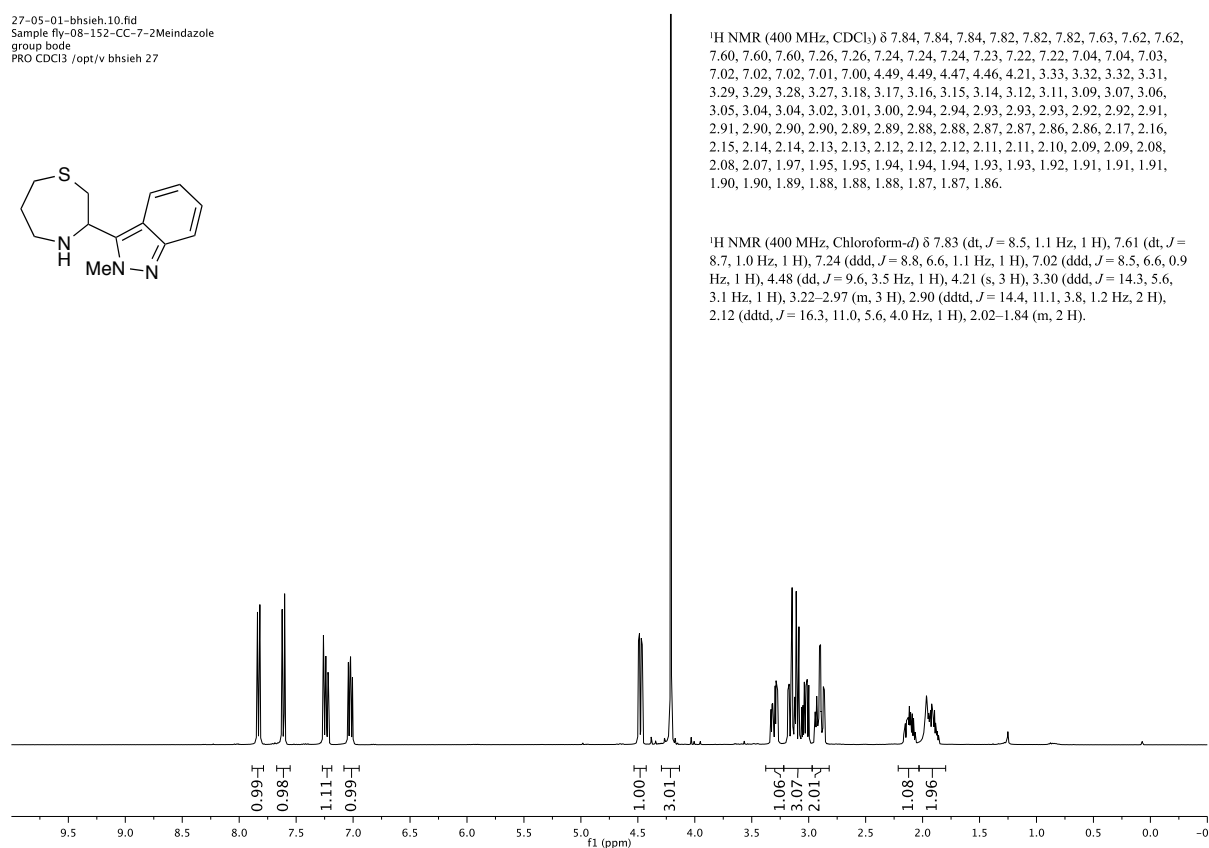

27-05-01-bhsieh.11.fid  
Sample fly-08-152-CC-7-2Meindazole  
group bode  
CAR CDCl3 /opt/v bhsieh 27

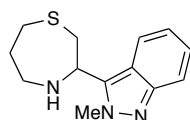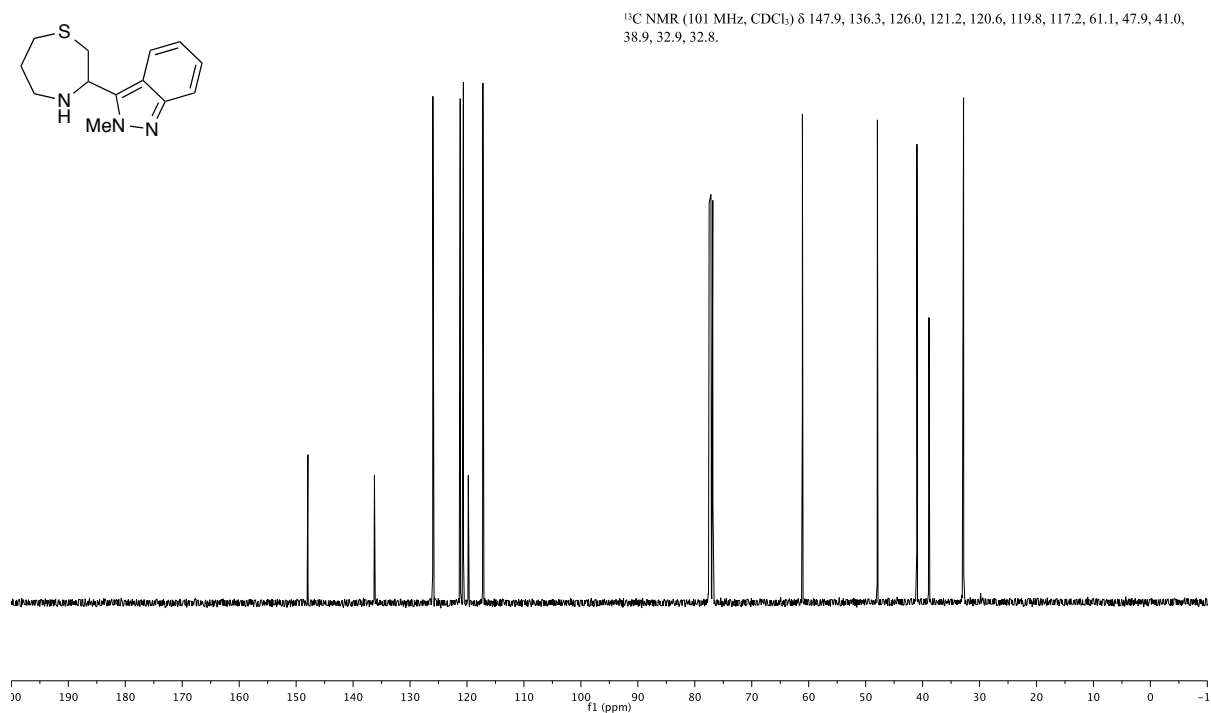

3-(1-Methyl-1*H*-benzo[*d*]imidazol-2-yl)-1,4-thiazepane (8f) (Scheme 3)

28-05-01-bhsieh.10.fid  
 Sample fly-08-161-CC-7-1Mebenzimidazole  
 group bode  
 PRO CDCl<sub>3</sub> /opt/v bhsieh 28

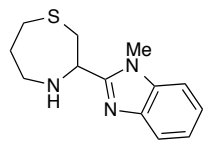

<sup>1</sup>H NMR (400 MHz, CDCl<sub>3</sub>) δ 7.78, 7.78, 7.78, 7.77, 7.76, 7.76, 7.35, 7.35, 7.35, 7.33, 7.33, 7.33, 7.31, 7.30, 7.29, 7.29, 7.28, 7.27, 7.27, 7.27, 7.27, 7.26, 7.26, 7.25, 7.24, 7.23, 4.29, 4.27, 4.26, 4.25, 3.84, 3.83, 3.58, 3.55, 3.54, 3.51, 3.23, 3.23, 3.22, 3.22, 3.20, 3.19, 3.18, 3.18, 3.06, 3.05, 3.04, 3.03, 3.02, 3.01, 3.00, 2.99, 2.98, 2.98, 2.97, 2.96, 2.94, 2.93, 2.86, 2.85, 2.85, 2.84, 2.84, 2.84, 2.83, 2.83, 2.82, 2.81, 2.21, 2.15, 2.14, 2.14, 2.13, 2.13, 2.12, 2.12, 2.11, 2.10, 2.10, 2.09, 2.09, 2.08, 2.07, 1.89, 1.88, 1.88, 1.87, 1.87, 1.86, 1.86, 1.85, 1.85, 1.85, 1.84, 1.84, 1.84, 1.83, 1.83, 1.83, 1.83, 1.82, 1.82, 1.81, 1.81, 1.81, 1.80.

<sup>1</sup>H NMR (400 MHz, Chloroform-*d*) δ 7.87–7.70 (m, 1 H), 7.47–7.11 (m, 3 H), 4.27 (dd, *J* = 9.8, 4.8 Hz, 1 H), 3.84 (s, 3 H), 3.54 (dd, *J* = 15.0, 9.8 Hz, 1 H), 3.21 (ddd, *J* = 15.0, 4.8, 1.0 Hz, 1 H), 3.09–2.90 (m, 2 H), 2.89–2.76 (m, 2 H), 2.21 (br, 1 H), 2.11 (ddq, *J* = 15.1, 6.9, 4.2 Hz, 1 H), 1.84 (dtdd, *J* = 13.1, 6.0, 4.8, 3.1 Hz, 1 H).

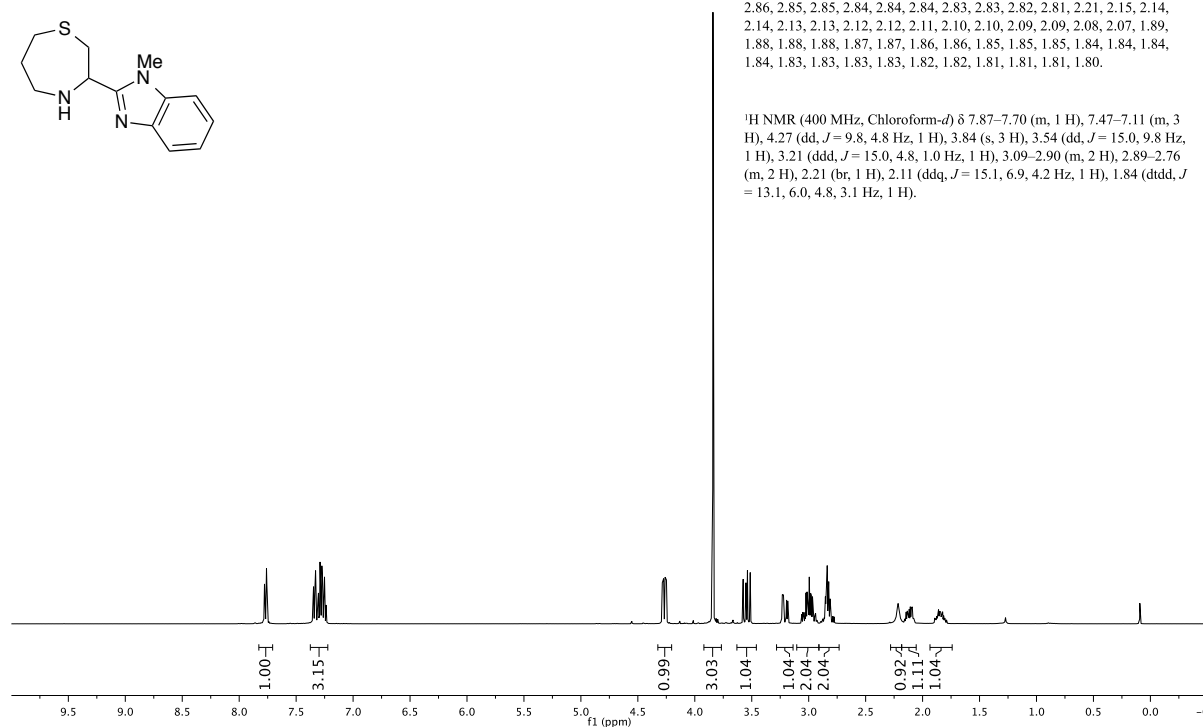

28-05-01-bhsieh.11.fid  
 Sample fly-08-161-CC-7-1Mebenzimidazole  
 group bode  
 CAR CDCl<sub>3</sub> /opt/v bhsieh 28

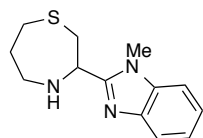

<sup>13</sup>C NMR (101 MHz, CDCl<sub>3</sub>) δ 155.0, 142.1, 136.1, 122.7, 122.0, 119.7, 109.2, 56.8, 44.7, 39.4, 34.8, 33.8, 30.1.

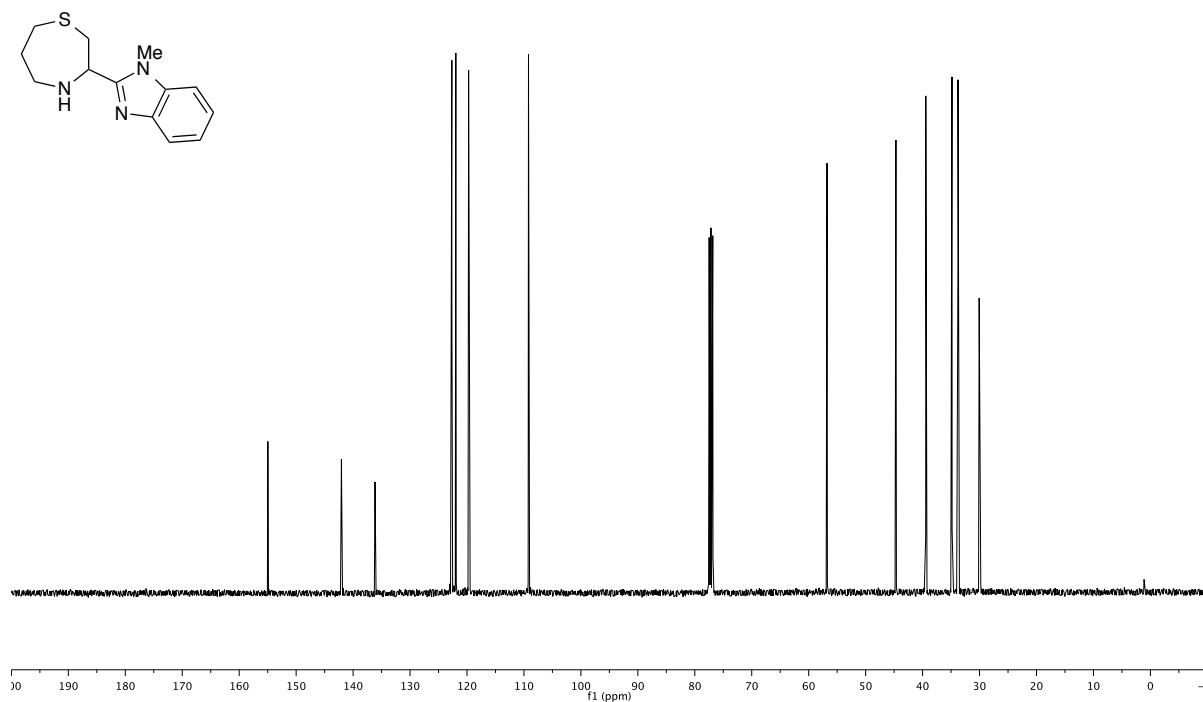

## 3-(4-Fluorophenyl)morpholine (12a)

40-26-07-bhsieh.10.fid  
Sample fly-12-038-CC  
group bode  
PRO CDCl<sub>3</sub> /opt/v bhsieh 40

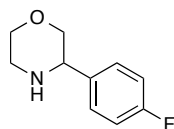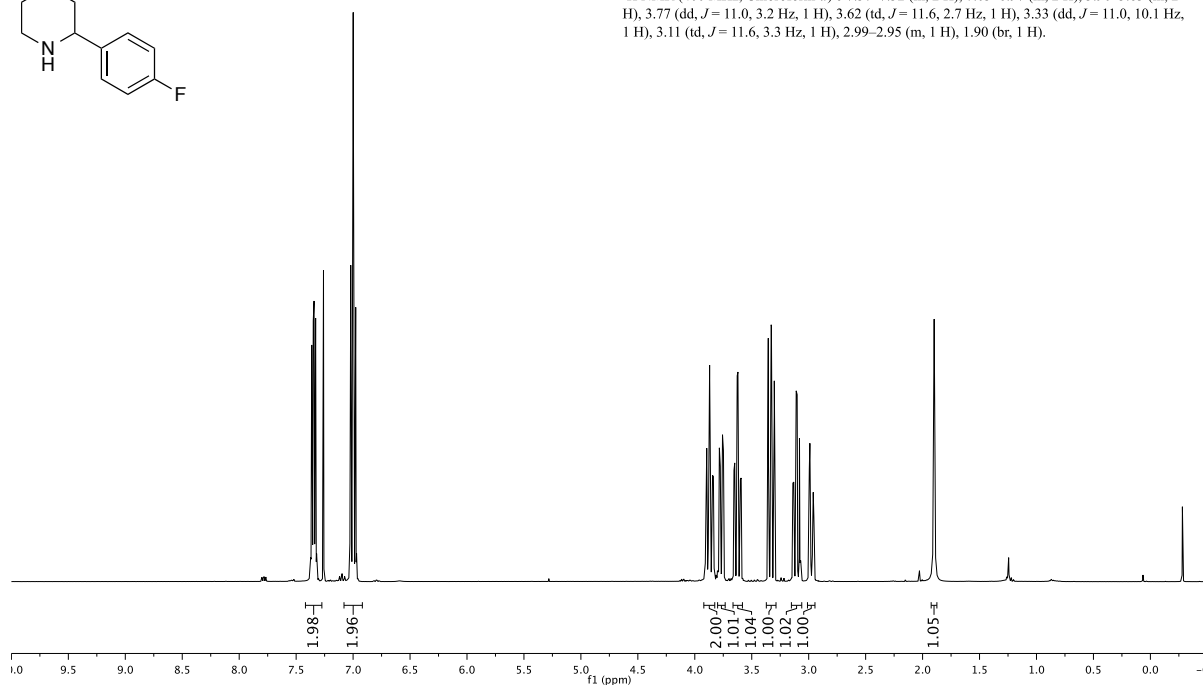

<sup>1</sup>H NMR (400 MHz, CDCl<sub>3</sub>) δ 7.37, 7.37, 7.36, 7.36, 7.36, 7.36, 7.35, 7.35, 7.34, 7.34, 7.33, 7.33, 7.33, 7.33, 7.32, 7.32, 7.03, 7.02, 7.02, 7.01, 7.00, 7.00, 6.99, 6.99, 6.98, 6.97, 3.90, 3.90, 3.88, 3.88, 3.87, 3.87, 3.87, 3.86, 3.86, 3.85, 3.85, 3.84, 3.84, 3.84, 3.83, 3.78, 3.78, 3.76, 3.75, 3.66, 3.65, 3.63, 3.62, 3.60, 3.59, 3.35, 3.33, 3.33, 3.30, 3.14, 3.13, 3.11, 3.10, 3.08, 3.07, 2.99, 2.99, 2.99, 2.98, 2.97, 2.96, 2.96, 2.95, 1.90.

<sup>1</sup>H NMR (400 MHz, Chloroform-*d*) δ 7.37–7.32 (m, 2 H), 7.03–6.97 (m, 2 H), 3.90–3.83 (m, 2 H), 3.77 (dd, *J* = 11.0, 3.2 Hz, 1 H), 3.62 (td, *J* = 11.6, 2.7 Hz, 1 H), 3.33 (dd, *J* = 11.0, 10.1 Hz, 1 H), 3.11 (td, *J* = 11.6, 3.3 Hz, 1 H), 2.99–2.95 (m, 1 H), 1.90 (br, 1 H).

40-26-07-bhsieh.11.fid  
Sample fly-12-038-CC  
group bode  
CAR CDCl<sub>3</sub> /opt/v bhsieh 40

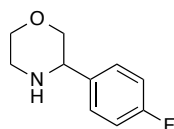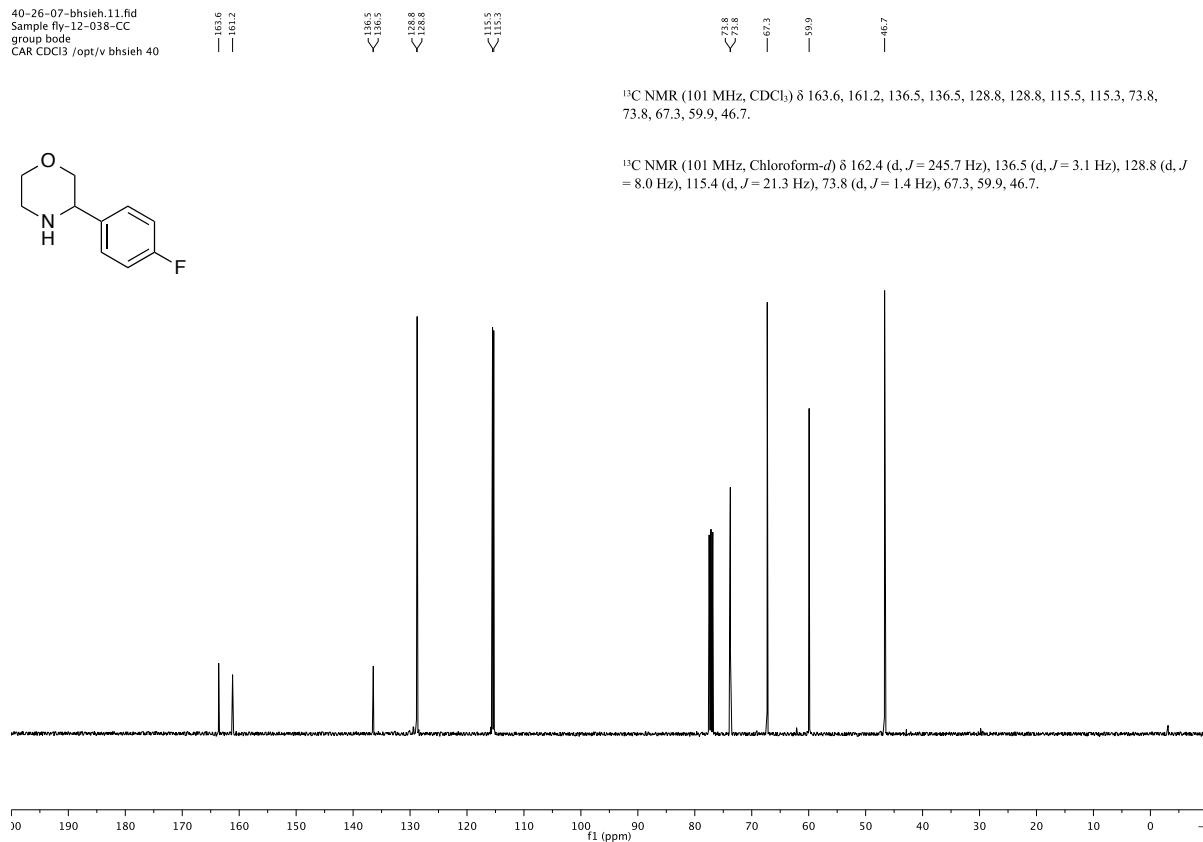

<sup>13</sup>C NMR (101 MHz, CDCl<sub>3</sub>) δ 163.6, 161.2, 136.5, 136.5, 128.8, 128.8, 115.5, 115.3, 73.8, 73.8, 67.3, 59.9, 46.7.

<sup>13</sup>C NMR (101 MHz, Chloroform-*d*) δ 162.4 (d, *J* = 245.7 Hz), 136.5 (d, *J* = 3.1 Hz), 128.8 (d, *J* = 8.0 Hz), 115.4 (d, *J* = 21.3 Hz), 73.8 (d, *J* = 1.4 Hz), 67.3, 59.9, 46.7.

## 3-(Morpholin-3-yl)benzonitrile (12b)

41-26-07-bhsieh.10.fid  
Sample fly-12-039-CC  
group bode  
PRO CDCl<sub>3</sub> /opt/v bhsieh 41

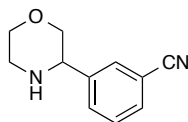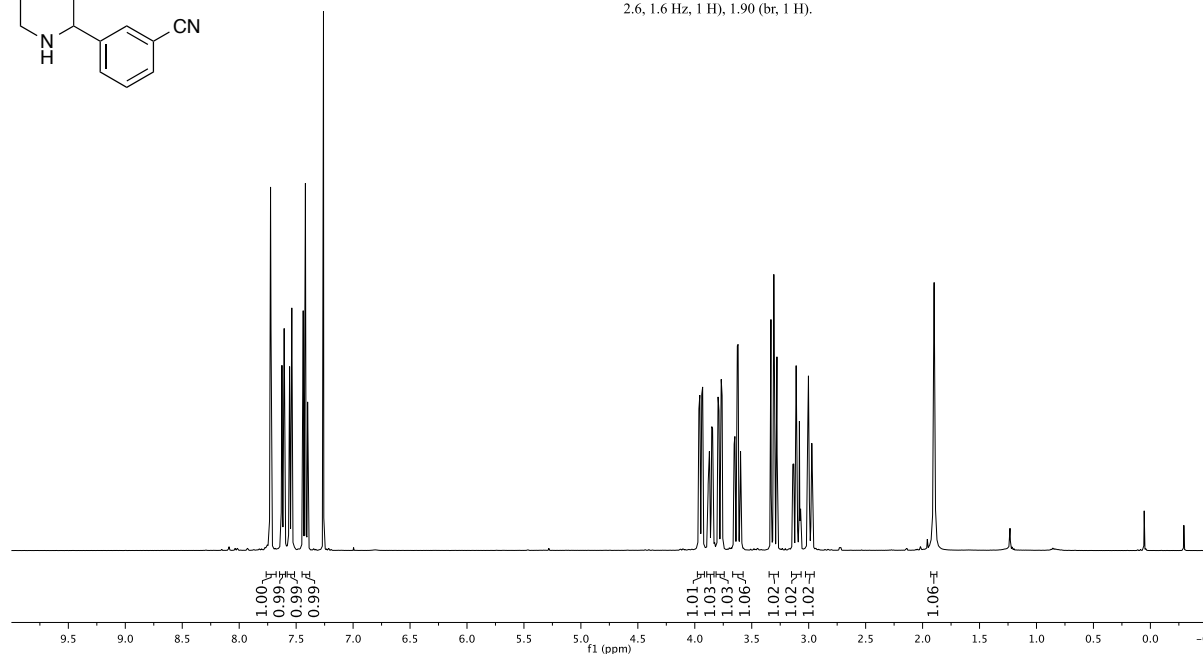

41-26-07-bhsieh.11.fid  
Sample fly-12-039-CC  
group bode  
CAR CDCl<sub>3</sub> /opt/v bhsieh 41

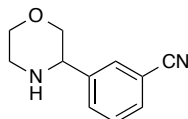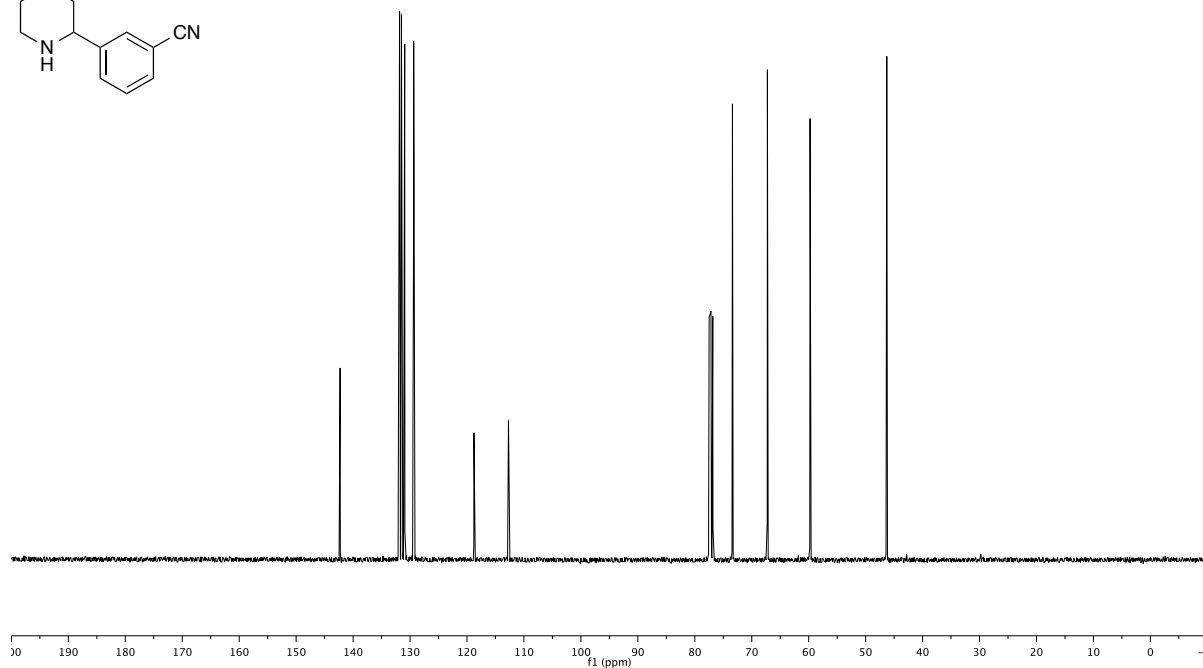

## 3-(((Trimethylsilyl)methyl)thio)propanal (S8)

41-20-11-bhsieh.10.fid  
Sample fly-11-101  
group bode

$^1\text{H NMR}$  (400 MHz,  $\text{CDCl}_3$ )  $\delta$  9.75, 9.74, 9.74, 2.79, 2.79, 2.78, 2.78, 2.77, 2.77, 2.77, 2.76, 2.75, 2.75, 2.75, 2.73, 2.72, 2.72, 2.72, 2.71, 2.71, 2.70, 2.70, 2.70, 2.70, 2.69, 2.69, 2.68, 2.68, 1.76, 0.05.

$^1\text{H NMR}$  (400 MHz, Chloroform-*d*)  $\delta$  9.74 (t,  $J = 1.5$  Hz, 1 H), 2.79–2.68 (m, 4 H), 1.76 (s, 2 H), 0.05 (s, 9 H).

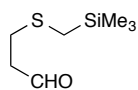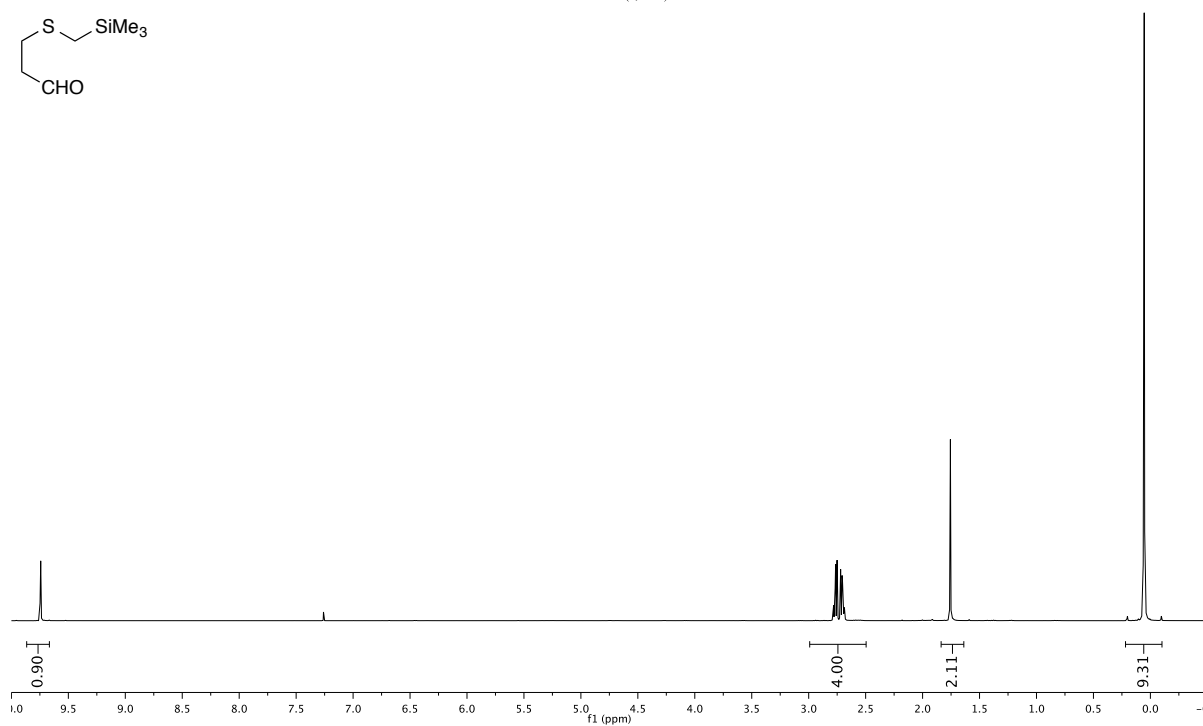

41-20-11-bhsieh.11.fid  
Sample fly-11-101  
group bode

43.2  
28.5  
18.6  
-1.7

$^{13}\text{C NMR}$  (101 MHz,  $\text{CDCl}_3$ )  $\delta$  200.9, 43.2, 28.5, 18.6, -1.7.

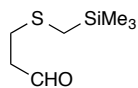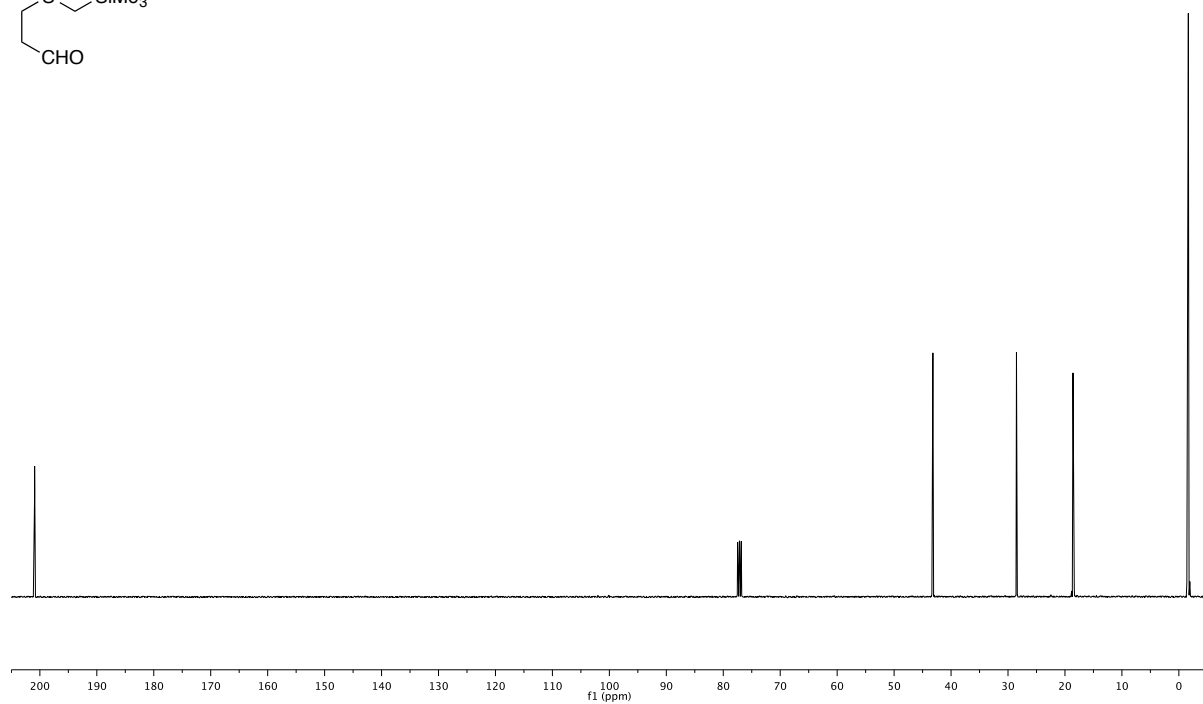

**(((4-(4-Fluorophenyl)but-3-en-1-yl)thio)methyl)trimethylsilane, mixture of *E,Z*-isomers (13)**

41-21-11-bhsieh.10.fid  
Sample fly-11-102  
group bode

<sup>1</sup>H NMR (400 MHz, CDCl<sub>3</sub>) δ 7.60, 7.59, 7.58, 7.57, 7.56, 7.54, 7.53, 7.53, 7.52, 7.51, 7.50, 7.32, 7.32, 7.31, 7.30, 7.29, 7.29, 7.28, 7.28, 7.27, 7.27, 7.26, 7.25, 7.25, 7.24, 7.24, 6.74, 6.71, 6.70, 6.70, 6.70, 6.66, 6.66, 6.66, 6.47, 6.45, 6.44, 6.43, 6.41, 6.40, 6.00, 6.00, 5.99, 5.97, 5.97, 5.96, 5.95, 5.94, 5.94, 2.95, 2.94, 2.93, 2.92, 2.92, 2.91, 2.91, 2.90, 2.90, 2.89, 2.89, 2.88, 2.88, 2.88, 2.87, 2.86, 2.81, 2.81, 2.80, 2.79, 2.79, 2.77, 2.77, 2.76, 2.75, 2.75, 2.10, 2.03, 0.39, 0.37.

The ratio of *E*-isomer & *Z*-isomer was 0.6:0.4, determined by <sup>1</sup>H NMR.

<sup>1</sup>H NMR (400 MHz, Chloroform-*d*) δ 7.60–7.56 (m, 1.2 H), 7.54–7.50 (m, 0.8 H), 7.32–7.24 (m, 2 H), 6.74–6.66 (m, 1 H), 6.43 (dt, *J* = 15.8, 6.8 Hz, 0.6 H), 6.00–5.94 (m, 0.4 H), 2.95–2.86 (m, 2.4 H), 2.81–2.75 (m, 1.6 H), 2.10 (s, 1.2 H), 2.03 (s, 0.8 H), 0.39 (s, 5.4 H), 0.37 (s, 3.6 H).

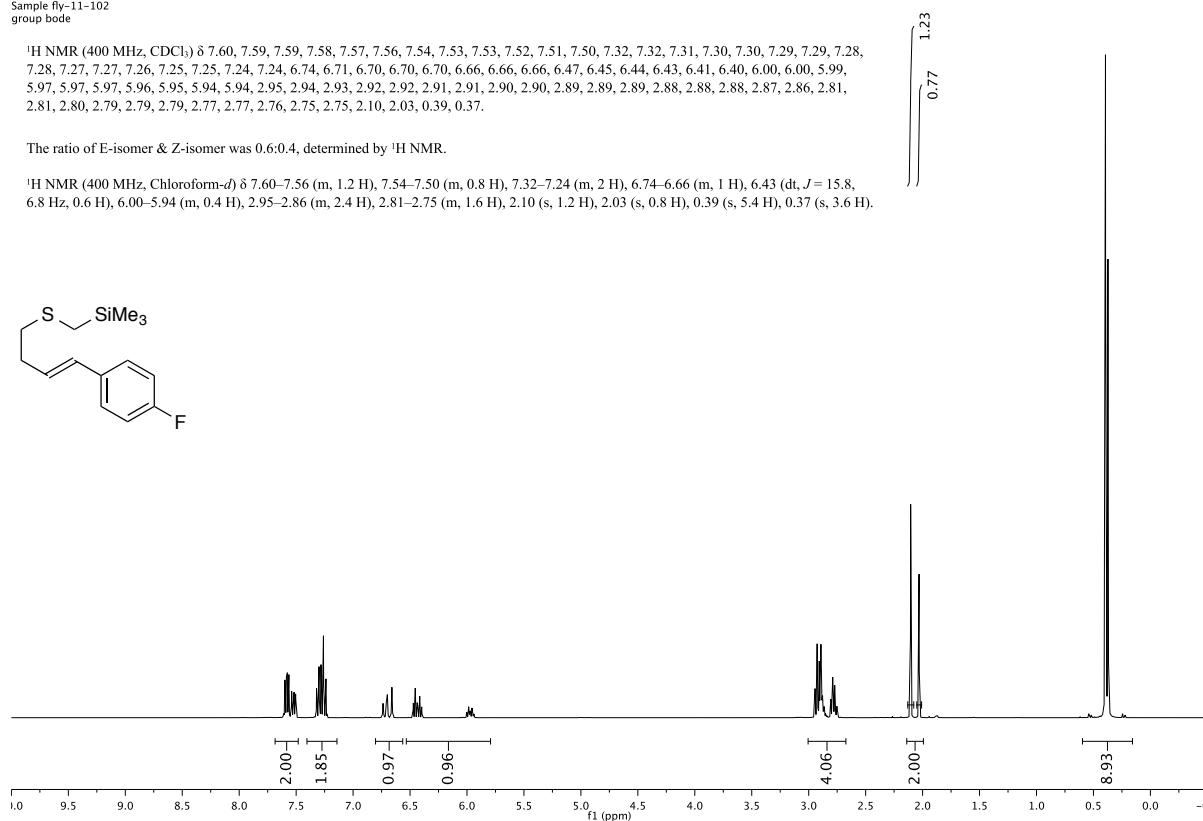

41-21-11-bhsieh.11.fid  
Sample fly-11-102  
group bode

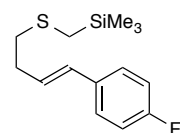

<sup>13</sup>C NMR (101 MHz, CDCl<sub>3</sub>) δ 163.3, 162.9, 160.9, 160.4, 133.8, 133.7, 133.5, 133.5, 130.7, 130.7, 130.4, 130.3, 129.9, 129.0, 128.6, 128.6, 127.6, 127.5, 115.5, 115.3, 115.3, 115.1, 36.1, 36.0, 32.8, 28.1, 18.6, 18.4, -1.6, -1.6.

<sup>13</sup>C NMR (101 MHz, Chloroform-*d*) δ 162.1\* (d, *J* = 246.0 Hz), 161.7 (d, *J* = 246.1 Hz), 133.8\* (d, *J* = 3.3 Hz), 133.5 (d, *J* = 3.4 Hz), 130.7 (d, *J* = 1.4 Hz), 130.4 (d, *J* = 7.8 Hz), 129.9, 129.0, 128.6\* (d, *J* = 2.3 Hz), 127.6\* (d, *J* = 7.9 Hz), 115.4\* (d, *J* = 21.5 Hz), 115.2 (d, *J* = 21.3 Hz), 36.1, 36.0\*, 32.8\*, 28.1, 18.6\*, 18.4, -1.56\*, -1.58.

Peaks of <sup>13</sup>C NMR from the major isomer were marked with asterisks if able to be recognized.

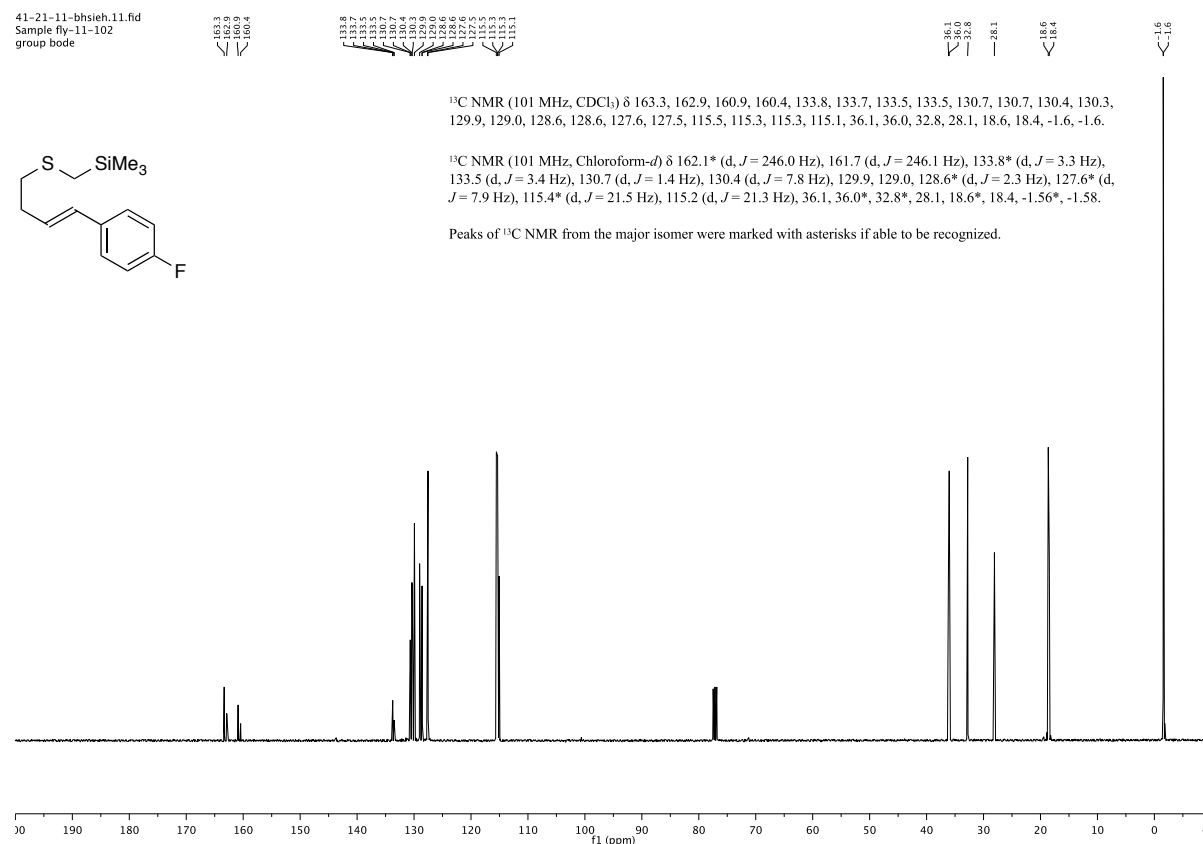

***N*-((4-Fluorophenyl)(tetrahydrothiophen-3-yl)methyl)acetamide, diastereomers (14)****major diastereomer product: 14a**

42-18-11-bhsieh.10.fid  
Sample fly-11-095-PTLC-2-B  
group bode

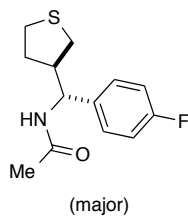

$^1\text{H NMR}$  (400 MHz,  $\text{CDCl}_3$ )  $\delta$  7.27, 7.26, 7.25, 7.24, 7.24, 7.23, 7.04, 7.03, 7.02, 7.02, 7.01, 7.01, 7.01, 7.00, 6.99, 6.03, 6.01, 4.98, 4.96, 4.93, 2.99, 2.98, 2.97, 2.96, 2.95, 2.94, 2.93, 2.89, 2.88, 2.87, 2.87, 2.86, 2.85, 2.83, 2.58, 2.57, 2.57, 2.57, 2.56, 2.55, 2.54, 2.54, 2.53, 2.53, 2.52, 2.51, 2.51, 2.42, 2.41, 2.40, 2.39, 2.38, 2.37, 2.22, 2.21, 2.21, 2.20, 2.20, 2.20, 2.19, 2.18, 2.18, 2.18, 2.17, 2.17, 2.16, 2.16, 2.15, 1.96, 1.96, 1.95, 1.92, 1.91, 1.90, 1.90, 1.89, 1.88, 1.87, 1.87, 1.86, 1.86, 1.85, 1.84, 1.82.

$^1\text{H NMR}$  (400 MHz, Chloroform-*d*)  $\delta$  7.31–7.19 (m, 2 H), 7.11–6.94 (m, 2 H), 6.02 (d,  $J = 9.0$  Hz, 1 H), 4.96 (t,  $J = 9.0$  Hz, 1 H), 2.96 (ddd,  $J = 11.1, 7.3, 4.2$  Hz, 1 H), 2.90–2.82 (m, 1 H), 2.59–2.49 (m, 2 H), 2.45–2.36 (m, 1 H), 2.24–2.13 (m, 1 H), 1.96 (s, 3 H), 1.92–1.83 (m, 1 H).

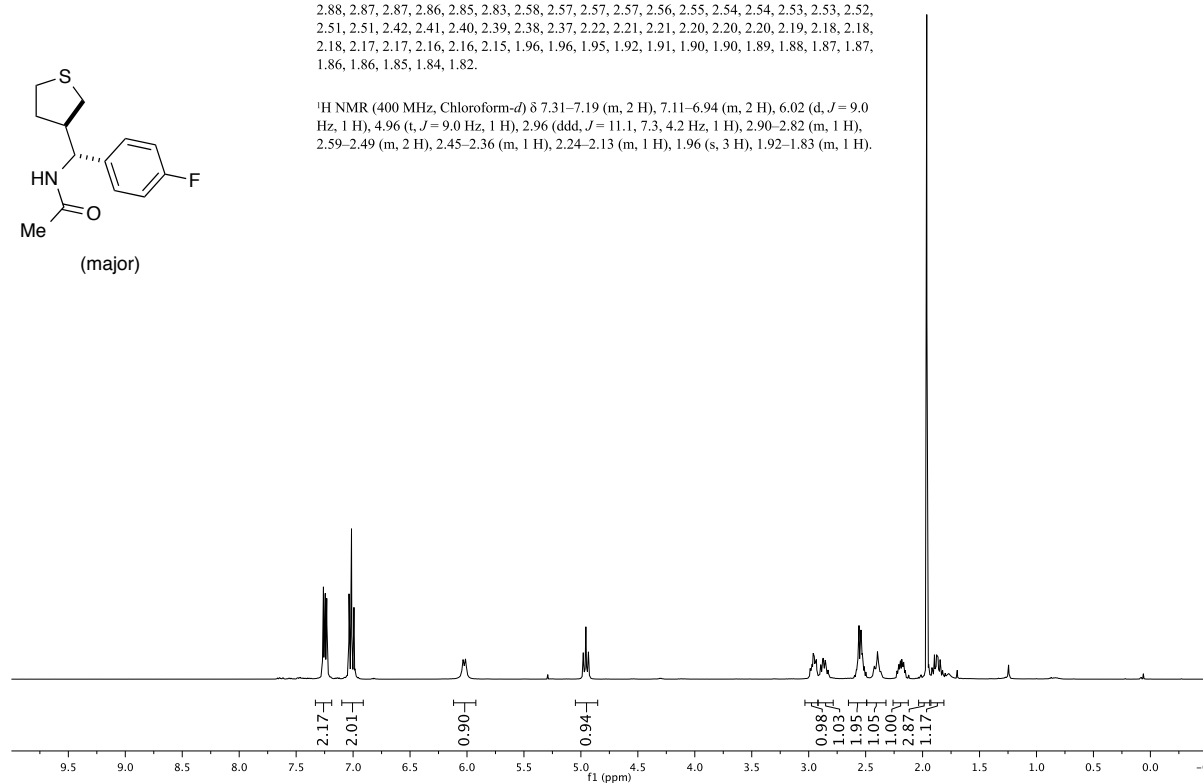

42-18-11-bhsieh.11.fid  
Sample fly-11-095-PTLC-2-B  
group bode

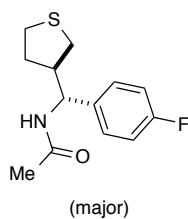

$^{13}\text{C NMR}$  (101 MHz,  $\text{CDCl}_3$ )  $\delta$  169.3, 162.2 (d,  $J = 246.5$  Hz), 137.3 (d,  $J = 3.3$  Hz), 128.6 (d,  $J = 8.0$  Hz), 115.8 (d,  $J = 21.5$  Hz), 55.1, 50.1, 34.3, 34.1, 30.5, 23.5.

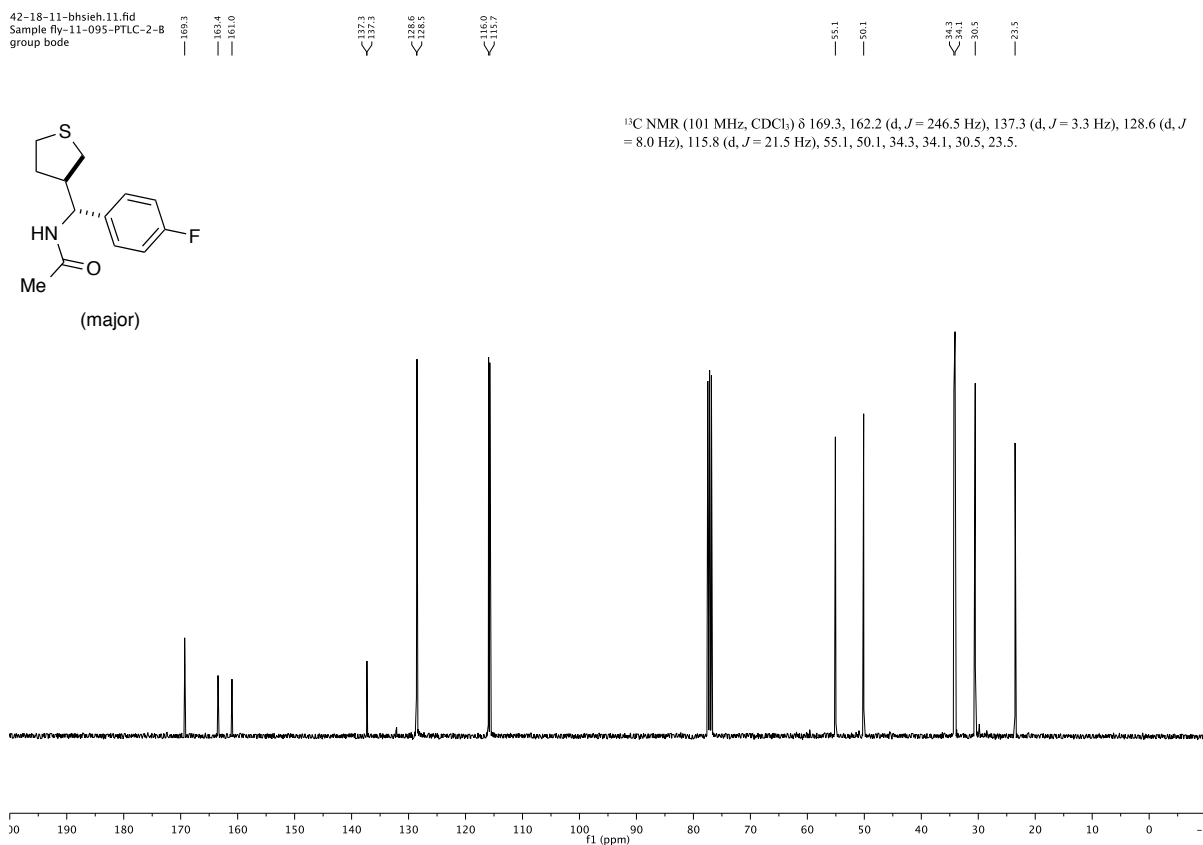



minor diastereomer product: **14b**

41-18-11-bhsieh.10.fid  
Sample fly-11-095-PTLC-2-A  
group bode

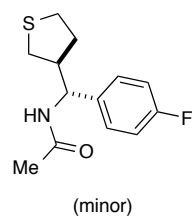

$^1\text{H NMR}$  (400 MHz,  $\text{CDCl}_3$ )  $\delta$  7.26, 7.26, 7.25, 7.24, 7.24, 7.23, 7.23, 7.22, 7.04, 7.03, 7.03, 7.02, 7.02, 7.01, 7.01, 7.00, 7.00, 6.17, 6.15, 4.97, 4.95, 4.93, 2.95, 2.93, 2.92, 2.91, 2.88, 2.87, 2.86, 2.85, 2.85, 2.84, 2.83, 2.82, 2.81, 2.81, 2.80, 2.79, 2.79, 2.77, 2.77, 2.75, 2.74, 2.72, 2.59, 2.57, 2.57, 2.56, 2.56, 2.56, 2.55, 2.54, 2.53, 2.52, 2.51, 2.50, 2.50, 2.49, 1.98, 1.97, 1.96, 1.96, 1.88, 1.87, 1.87, 1.86, 1.85, 1.84, 1.84, 1.83, 1.82, 1.81, 1.63, 1.61, 1.60, 1.60, 1.58, 1.58, 1.58, 1.57, 1.56, 1.55, 1.55, 1.53.

$^1\text{H NMR}$  (400 MHz,  $\text{Chloroform-}d$ )  $\delta$  7.24 (ddd,  $J = 8.7, 4.5, 1.9$  Hz, 2 H), 7.09–6.96 (m, 2 H), 6.16 (d,  $J = 8.6$  Hz, 1 H), 4.95 (t,  $J = 9.0$  Hz, 1 H), 2.93 (dd,  $J = 10.7, 6.5$  Hz, 1 H), 2.89–2.78 (m, 2 H), 2.74 (dd,  $J = 10.8, 8.6$  Hz, 1 H), 2.63–2.46 (m, 1 H), 1.97 (s, 3 H), 1.85 (dtd,  $J = 12.1, 5.9, 3.7$  Hz, 1 H), 1.58 (dtd,  $J = 12.7, 9.6, 7.7$  Hz, 1 H).

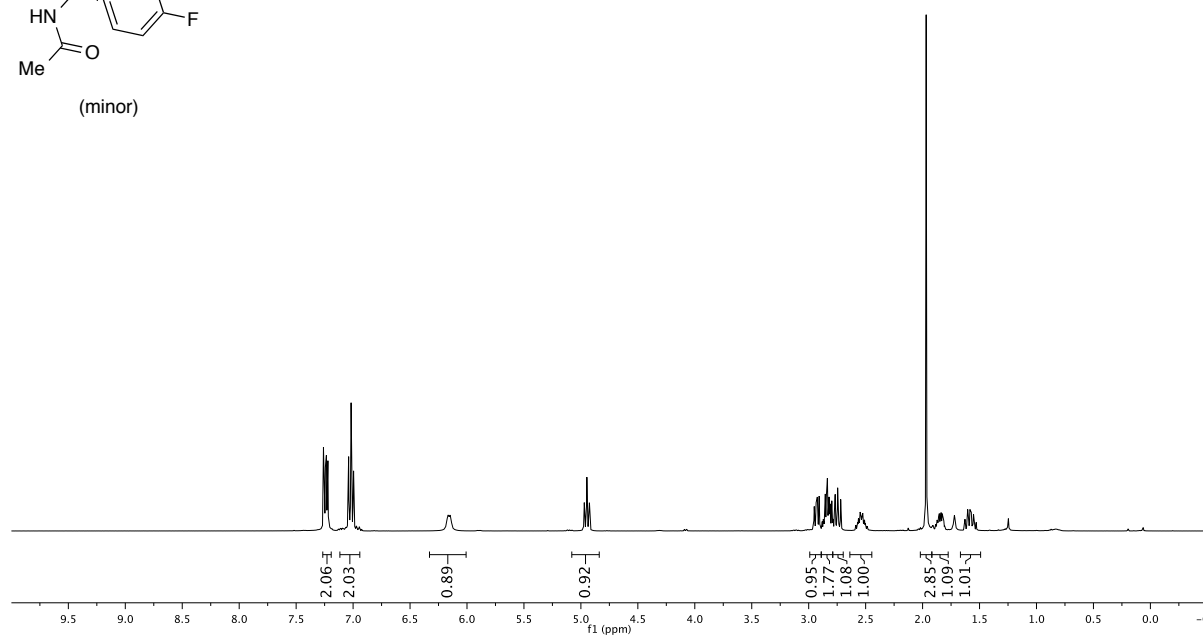

41-18-11-bhsieh.11.fid  
Sample fly-11-095-PTLC-2-A  
group bode

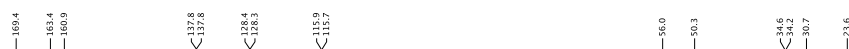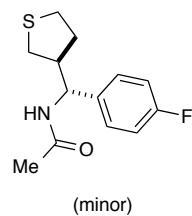

$^{13}\text{C NMR}$  (101 MHz,  $\text{CDCl}_3$ )  $\delta$  169.4, 162.2 (d,  $J = 246.3$  Hz), 137.8 (d,  $J = 3.3$  Hz), 128.4 (d,  $J = 8.1$  Hz), 115.8 (d,  $J = 21.4$  Hz), 56.0, 50.3, 34.6, 34.2, 30.7, 23.6.

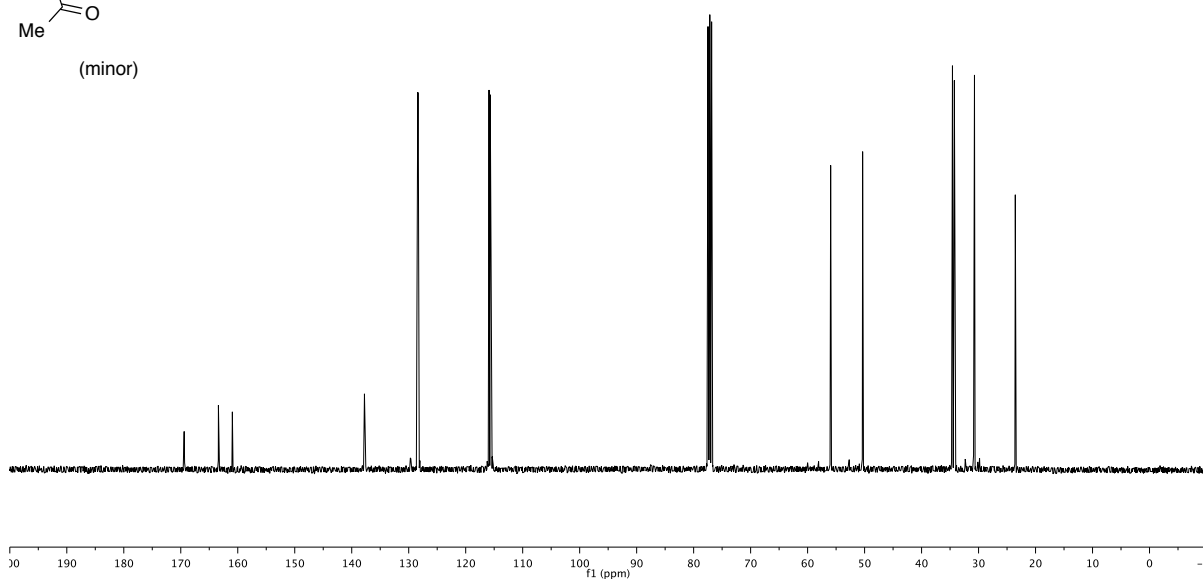

### *N*-(Phenyl(3,4,6,10*b*-tetrahydro-1*H*-[1,4]thiazino[3,4-*a*]isoindol-6-yl)methyl)acetamide, mixture of isomers (16) (Scheme 5*b*)

22-22-01-bhsieh.10.fid  
Sample fly-11-110-CC-double-cyc  
group bode  
PRO CDCl<sub>3</sub> /opt/v bhsieh 22

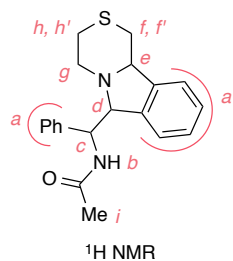

<sup>1</sup>H NMR (400 MHz, CDCl<sub>3</sub>)  $\delta$  7.43, 7.43, 7.42, 7.42, 7.41, 7.40, 7.39, 7.38, 7.38, 7.37, 7.37, 7.37, 7.36, 7.35, 7.35, 7.35, 7.34, 7.33, 7.32, 7.32, 7.31, 7.30, 7.30, 7.30, 7.29, 7.29, 7.27, 7.27, 7.26, 7.25, 7.25, 7.24, 7.24, 7.24, 7.23, 7.23, 7.21, 7.17, 7.16, 7.16, 7.16, 7.15, 7.15, 7.14, 7.14, 7.14, 7.14, 7.13, 6.45, 6.44, 6.36, 6.36, 6.34, 6.34, 5.60, 5.60, 5.58, 5.58, 5.45, 5.43, 4.43, 4.42, 4.41, 3.90, 3.89, 3.88, 3.87, 3.86, 3.86, 3.05, 3.05, 3.04, 3.03, 3.02, 3.02, 3.01, 3.00, 2.94, 2.93, 2.91, 2.91, 2.85, 2.84, 2.83, 2.82, 2.82, 2.81, 2.80, 2.80, 2.79, 2.78, 2.50, 2.49, 2.48, 2.48, 2.47, 2.46, 2.45, 2.25, 2.24, 2.24, 2.23, 2.22, 2.21, 2.21, 2.20, 1.97, 1.83.

<sup>1</sup>H NMR (400 MHz, Chloroform-*d*)  $\delta$  7.47–7.18 (m, 8 H, *a*), 7.15 (tdd,  $J=4.2, 3.2, 0.9$  Hz, 1 H, *a*), 6.40 (dd,  $J=37.7, 7.8$  Hz, 1 H, *b*), 5.59 (dd,  $J=7.8, 1.7$  Hz, 1 H, *c*), 4.43 (t,  $J=2.2$  Hz, 1 H, *d*), 3.88 (dd,  $J=10.4, 2.5$  Hz, 1 H, *e*), 3.03 (dt,  $J=12.5, 1.8$  Hz, 1 H, *f*), 2.96–2.70 (m, 2 H, *f* & *h*), 2.55–2.39 (m, 2 H, *g*), 2.23 (dq,  $J=12.4, 2.1$  Hz, 1 H, *h'*), 1.83 (s, 3 H, *i*).

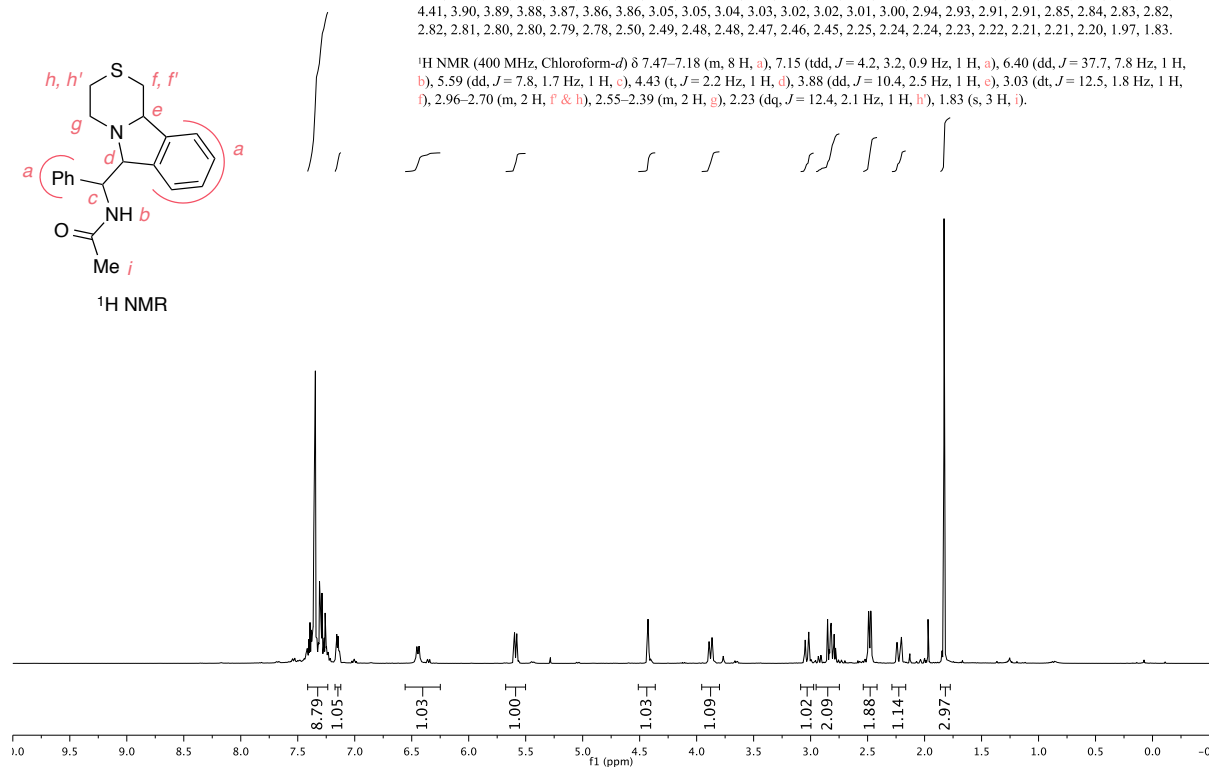

22-22-01-bhsieh.11.fid  
Sample fly-11-110-CC-double-cyc  
group bode  
CAR CDCl<sub>3</sub> /opt/v bhsieh 22

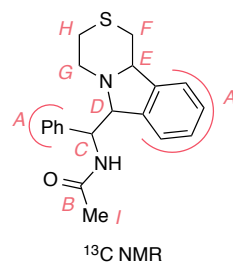

<sup>13</sup>C NMR (101 MHz, CDCl<sub>3</sub>)  $\delta$  170.8, 169.9\* (*B*), 143.1, 140.8\* (*A*), 140.5\* (*A*), 138.9\* (*A*), 137.0, 129.2, 129.1, 128.8\* (*A*), 128.7, 128.3, 128.2\* (*A*), 127.9\* (*A*), 127.9, 127.7, 127.4, 127.3, 127.2\* (*A*), 126.5, 125.8, 125.7\* (*A*), 123.5, 122.2\* (*A*), 121.4, 121.1, 120.6\* (*A*), 120.4, 71.5\* (*D*), 70.3, 68.8\* (*E*), 66.9, 53.2\* (*C*), 52.7\* (*G*), 51.8, 50.1, 31.9\* (*F*), 28.7, 28.4\* (*H*), 23.4, 23.2\* (*I*).

Peaks of <sup>13</sup>C NMR from the major isomer were marked with asterisks if able to be recognized.

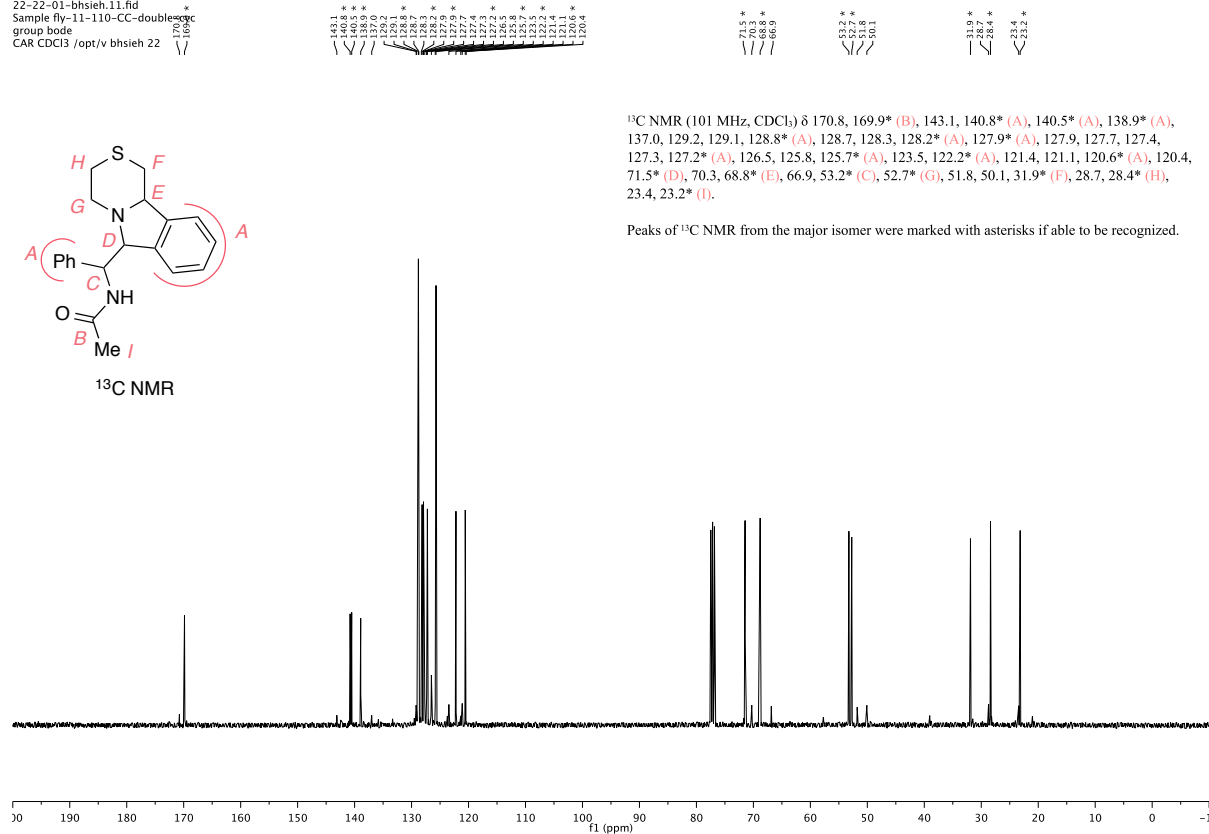

## \* COSY spectra of 16.

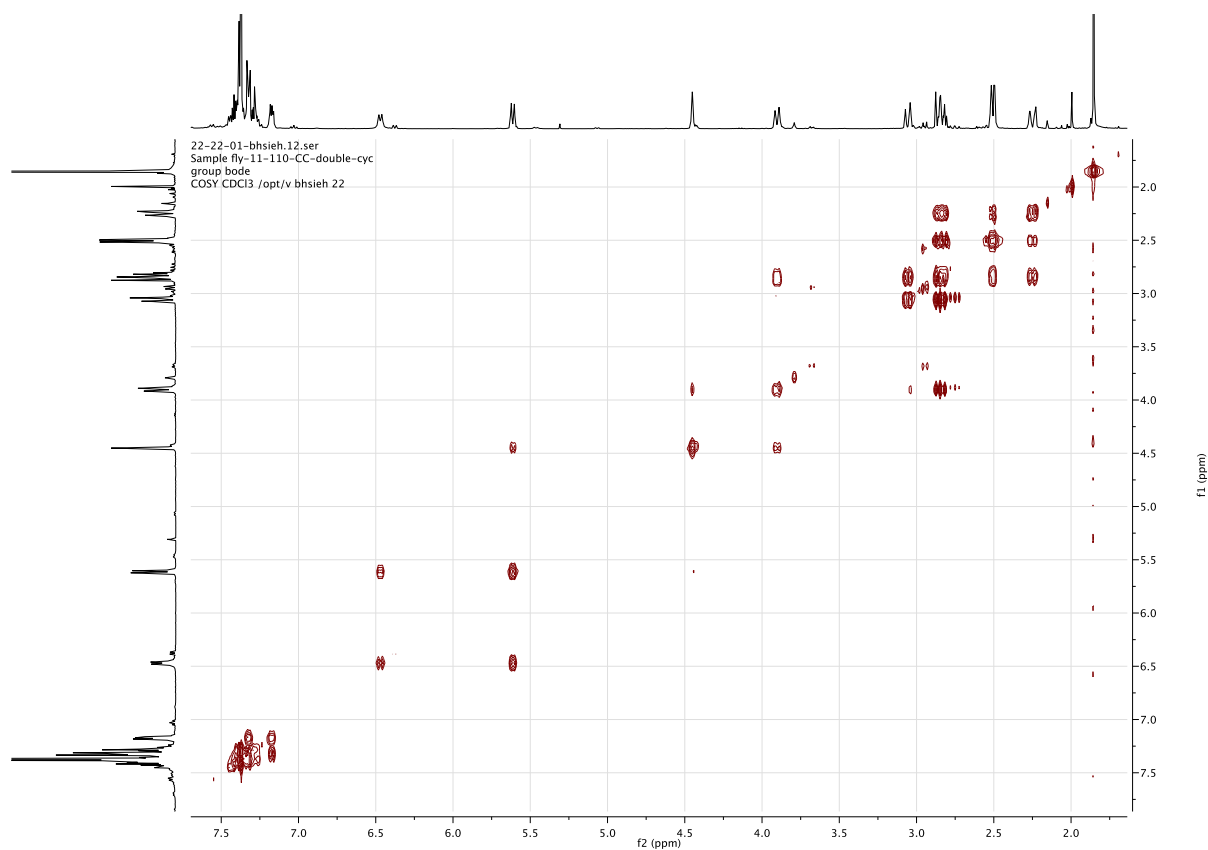

## \* HSQC spectra of 16.

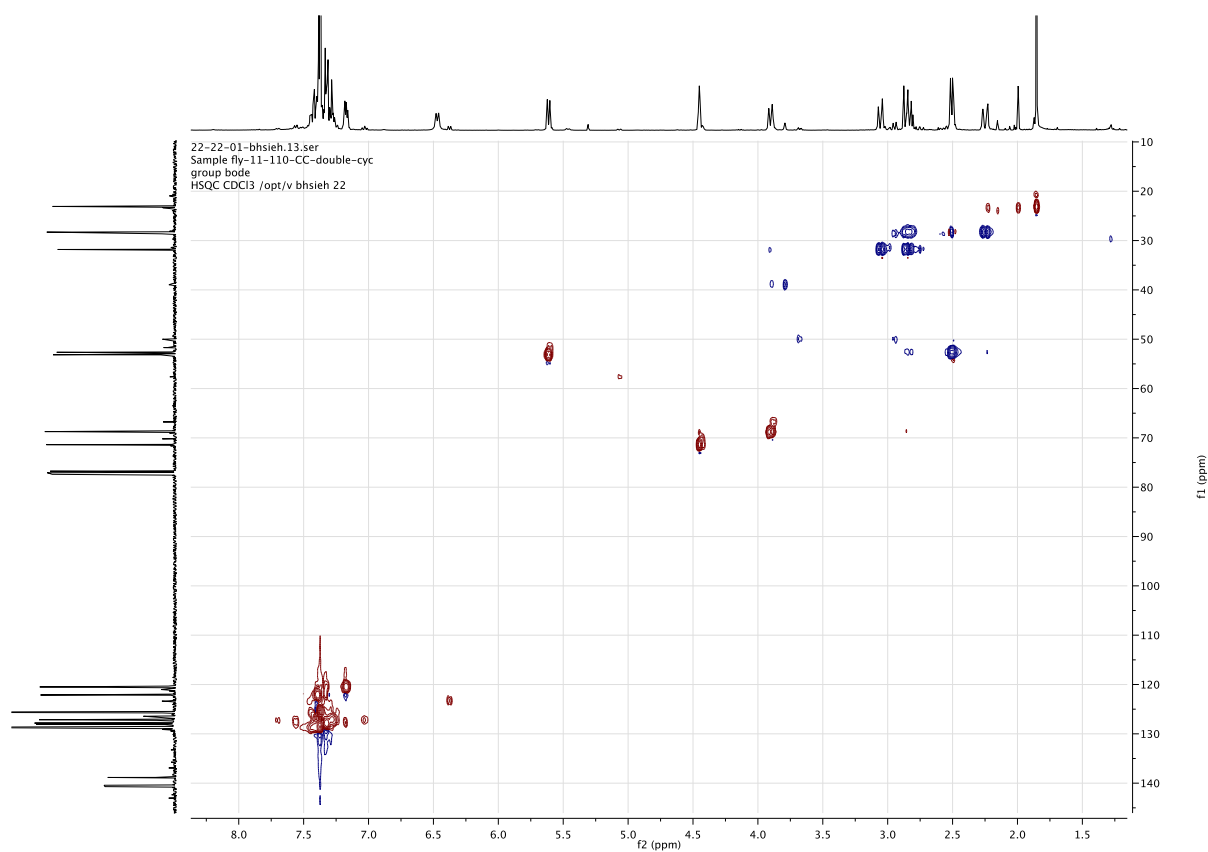

\* HMBC spectra of 16.

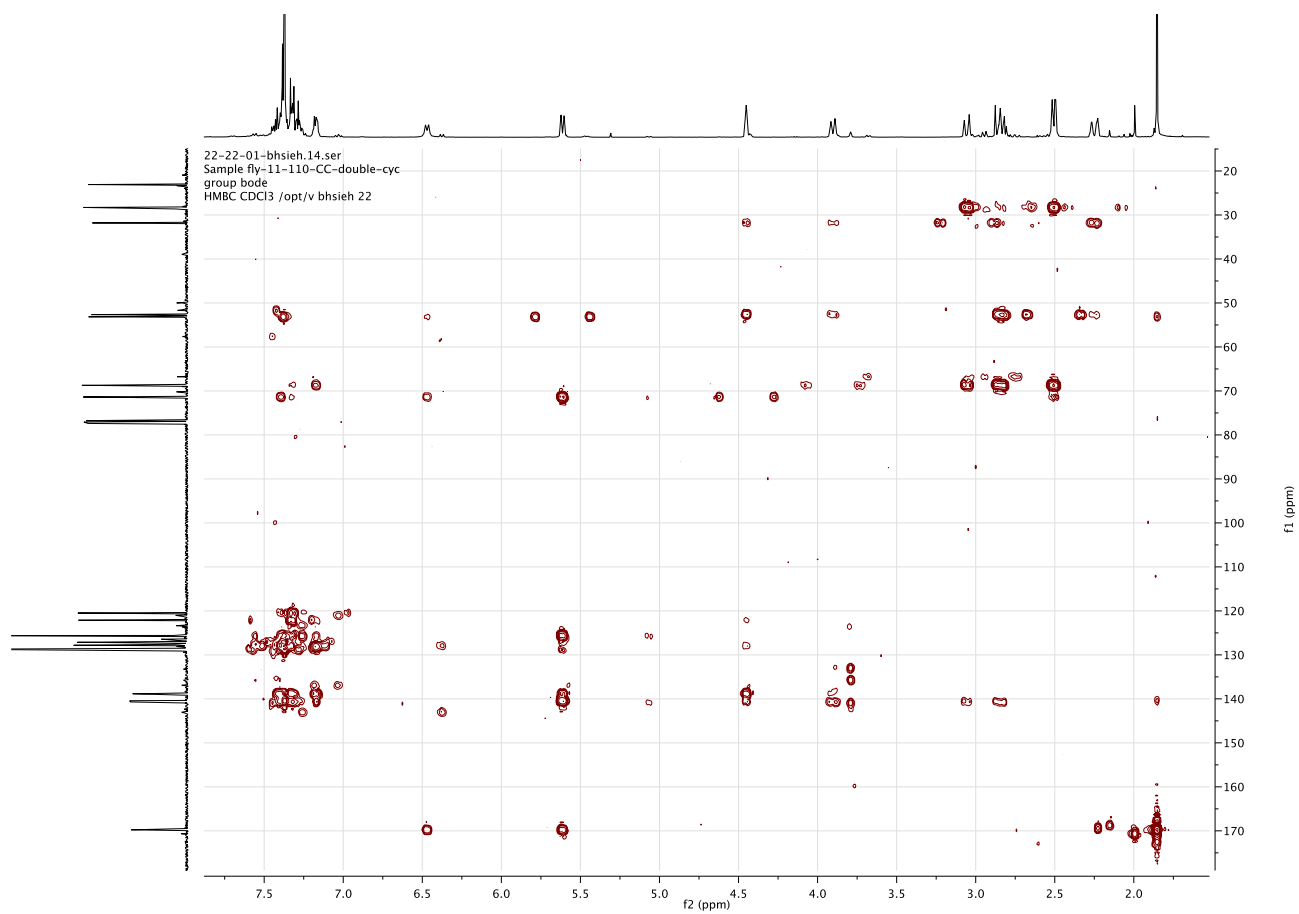

Supplement: oc6b00334_si_001.pdf [file oc6b00334_si_001.pdf]
